# Supplementary material for: Arabidopsis thaliana Accessions from the Chernobyl Exclusion Zone Show Decreased Sensitivity to Additional Acute Irradiation
Source: MDPI journal article supplement (doi:10.3390/plants11223142), 2022-11-17

**Figure S19.** Photos of the experimental plot Babchin (Polesye State Radiation-Ecological Reserve, Gomel Region, Republic of Belarus)  
**GPS coordinates :** 51.791470, 30.007070

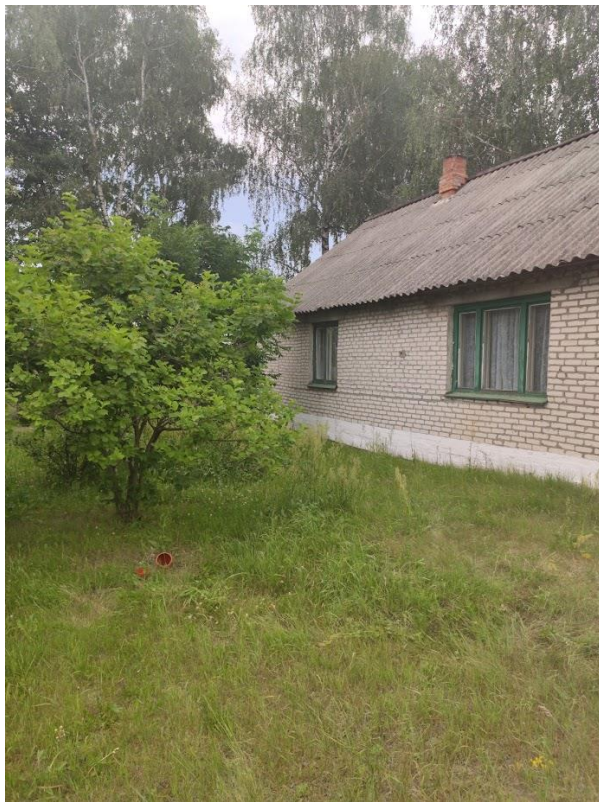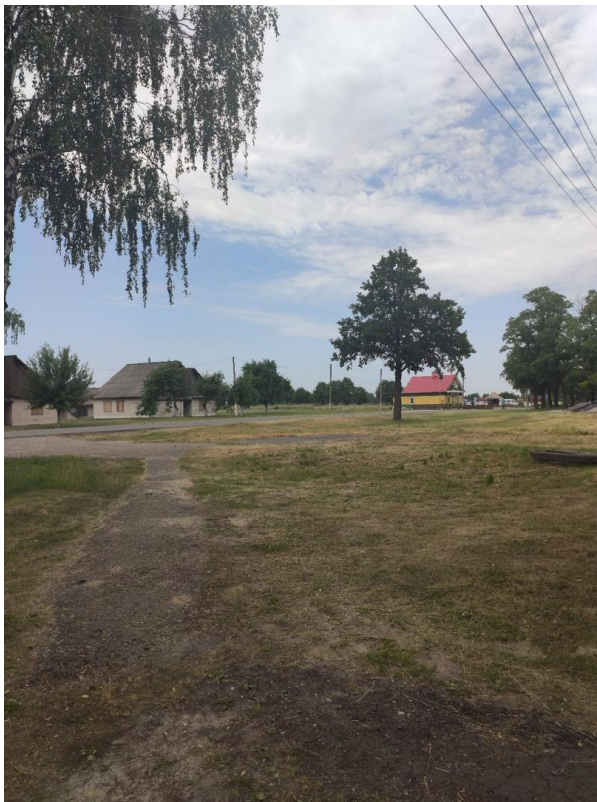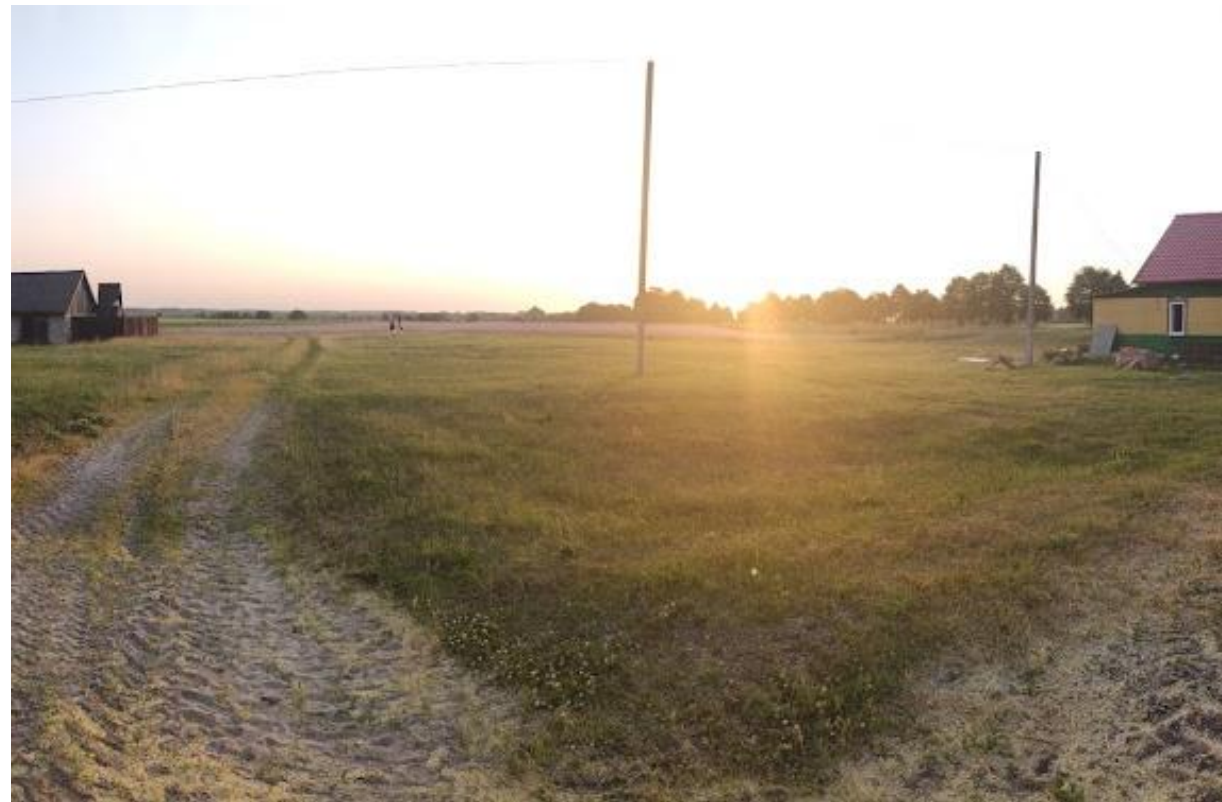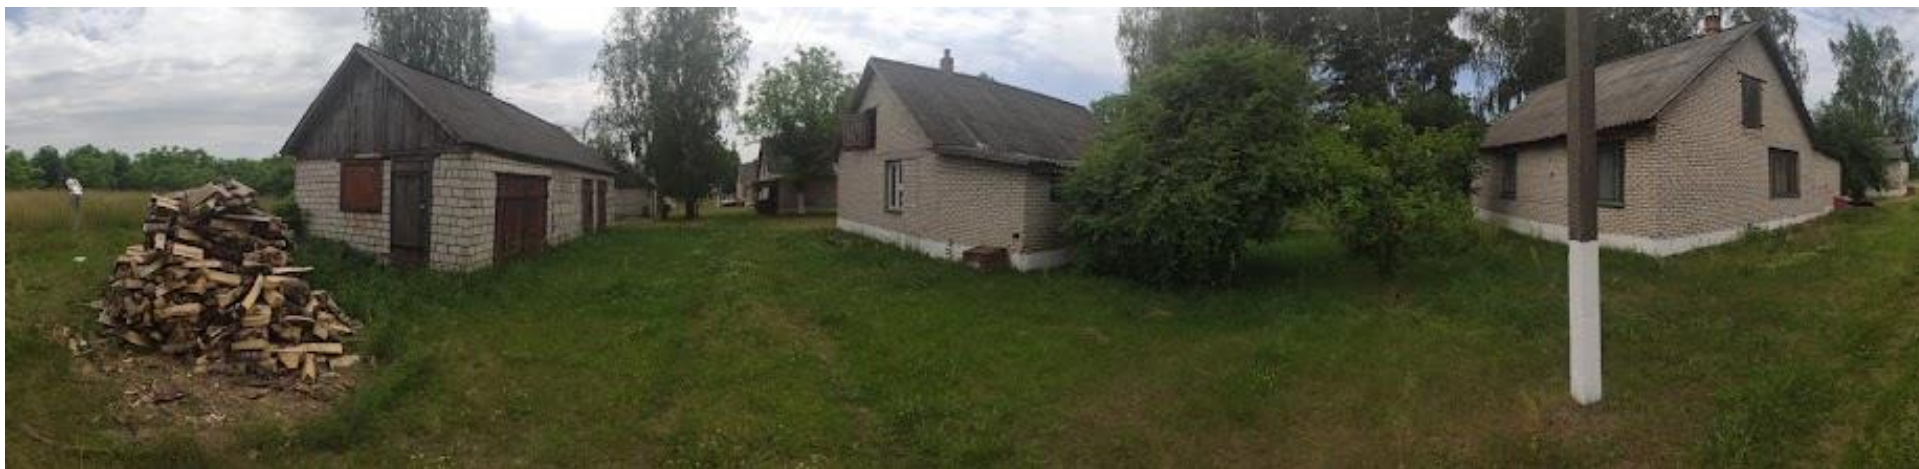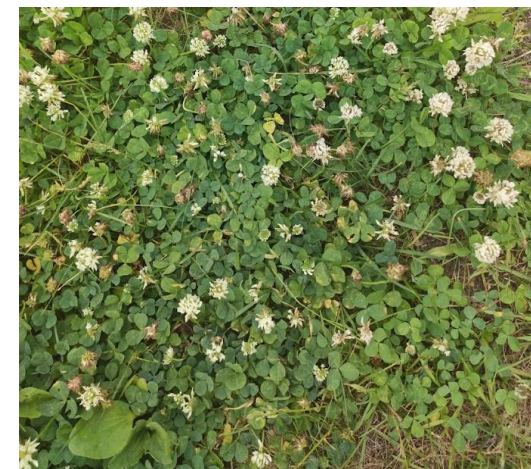



**Figure S20.** Photos of the experimental plot Vygrebnyaya Sloboda (Polesye State Radiation-Ecological Reserve, Gomel Region, Republic of Belarus)  
**GPS coordinates:** 51.650500, 30.135470

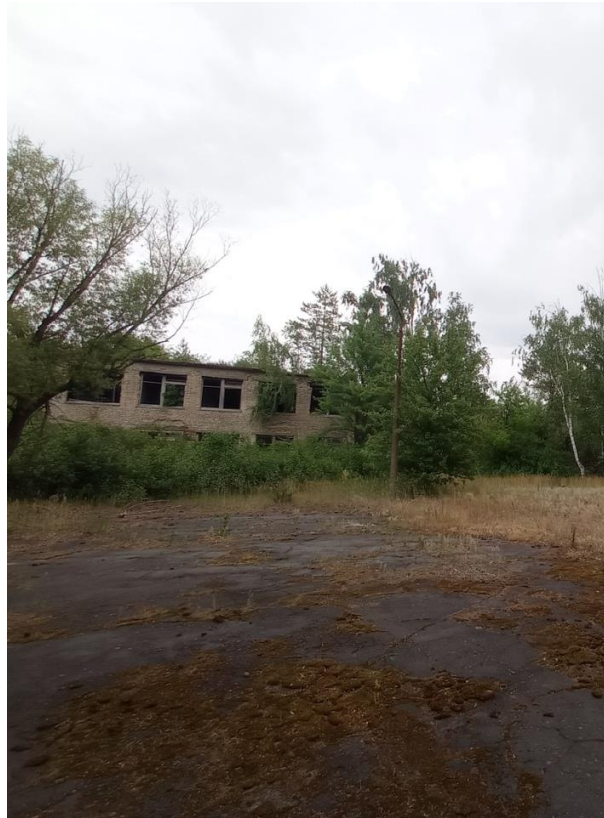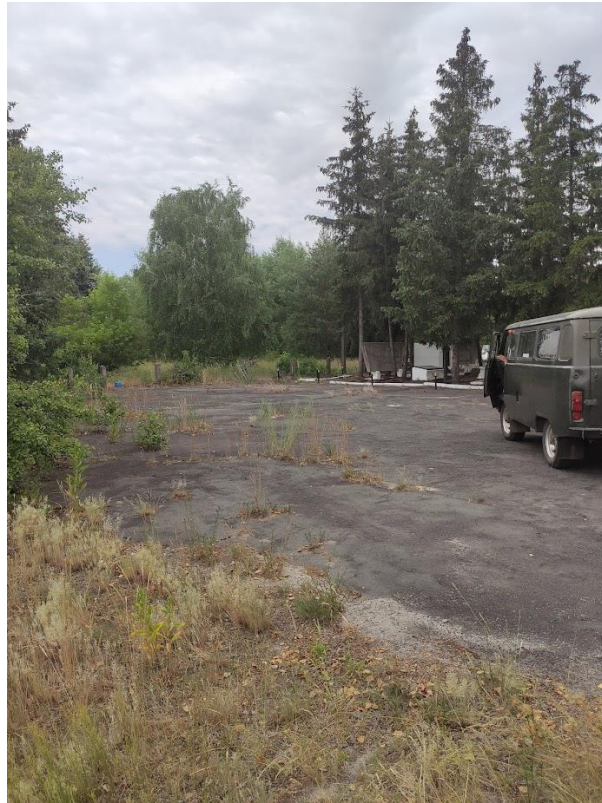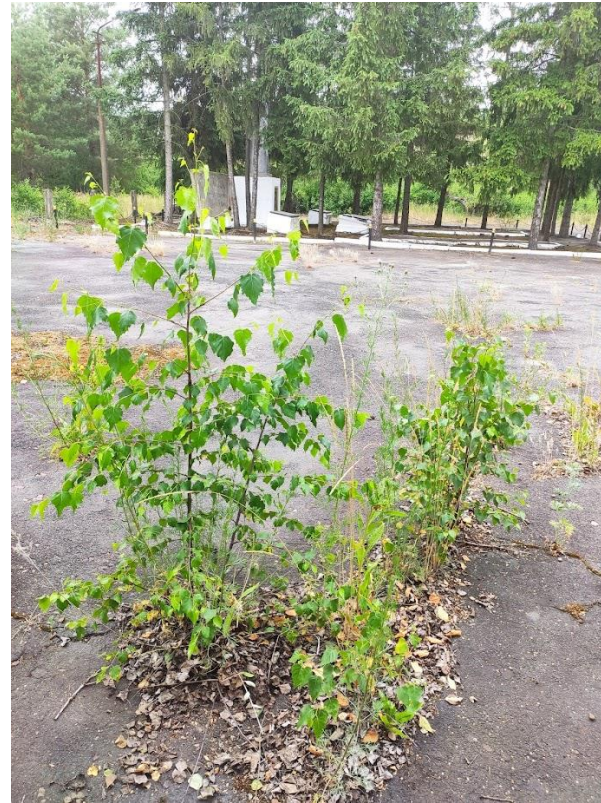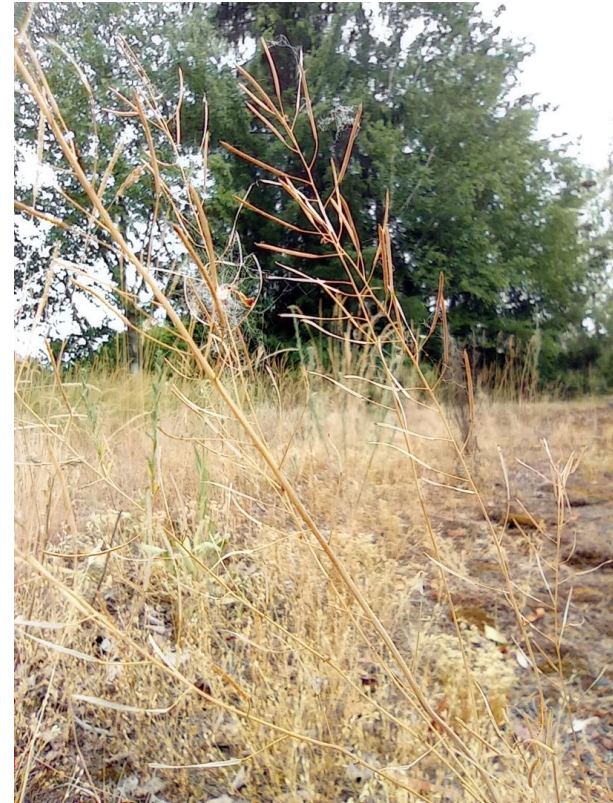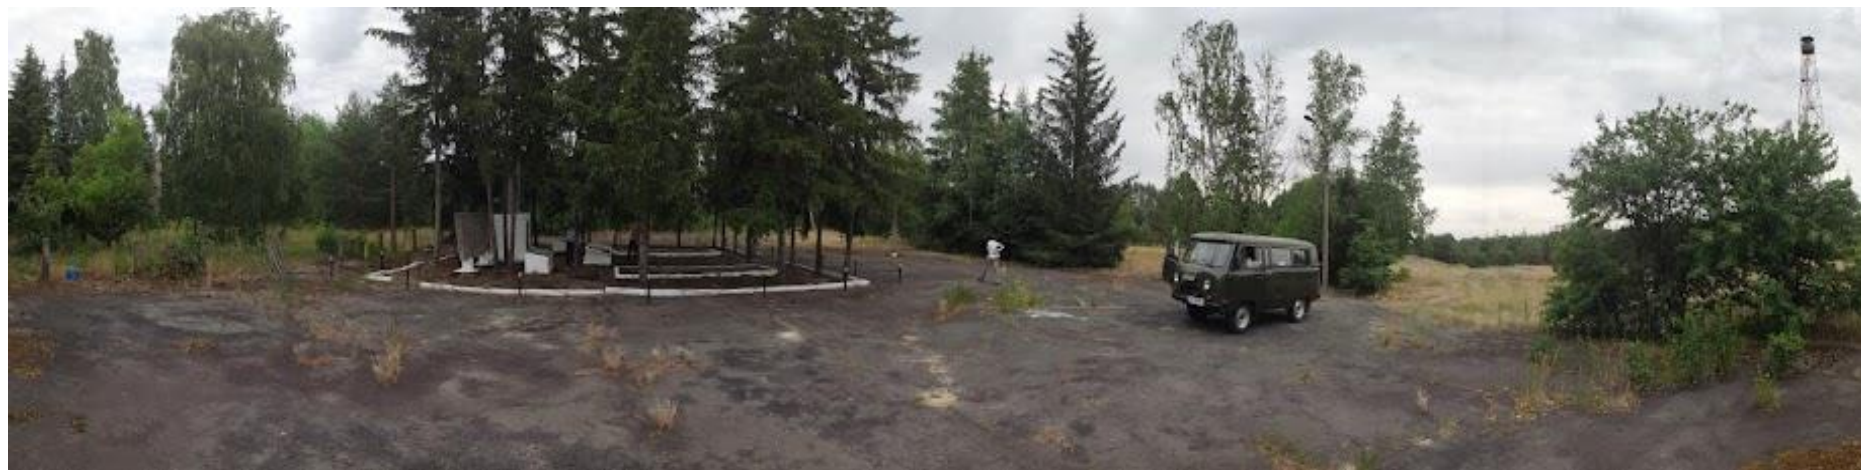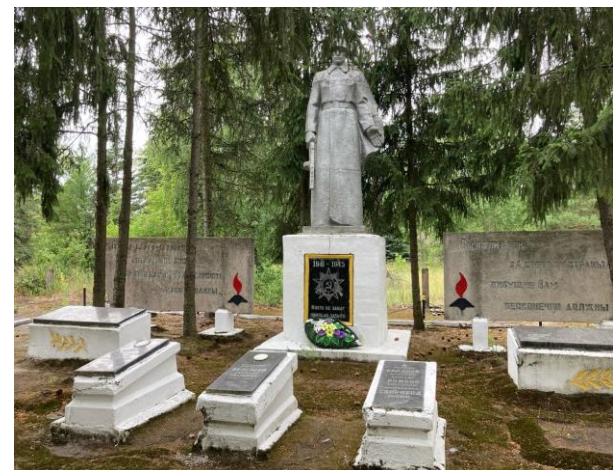



**Figure S21.** Photos of the experimental plot Masany (Polesye State Radiation-Ecological Reserve, Gomel Region, Republic of Belarus)  
GPS coordinates: 51.513210, 30.020740

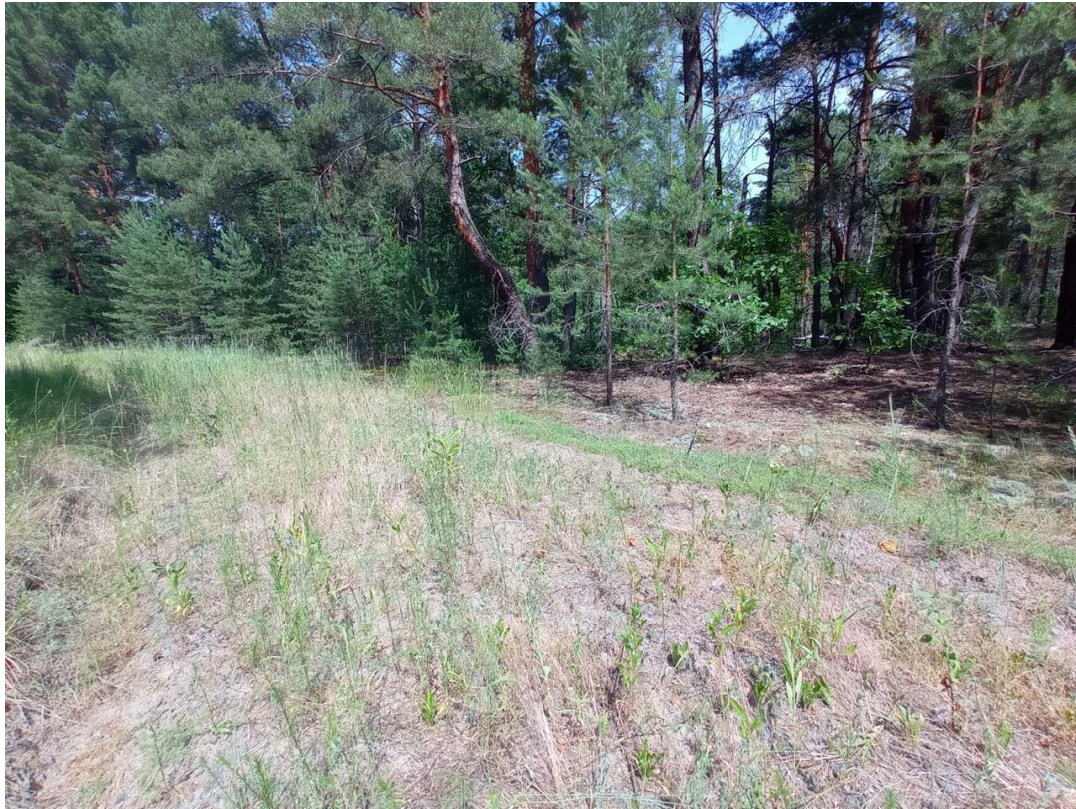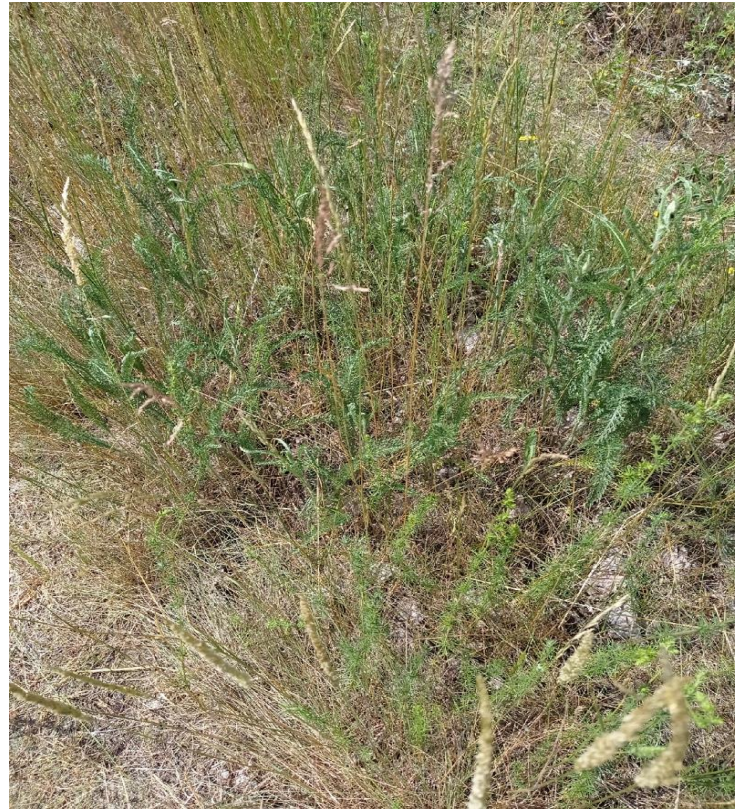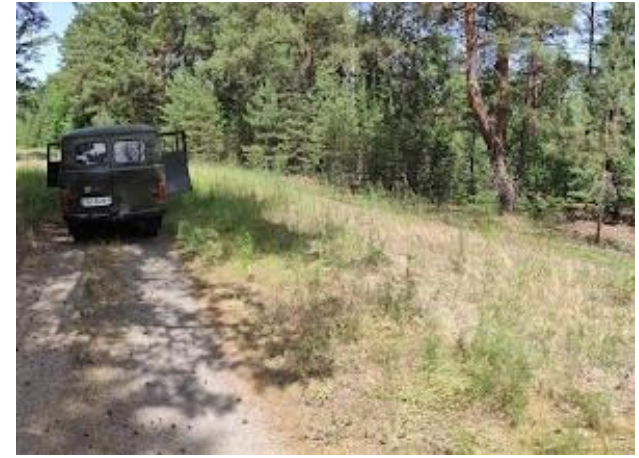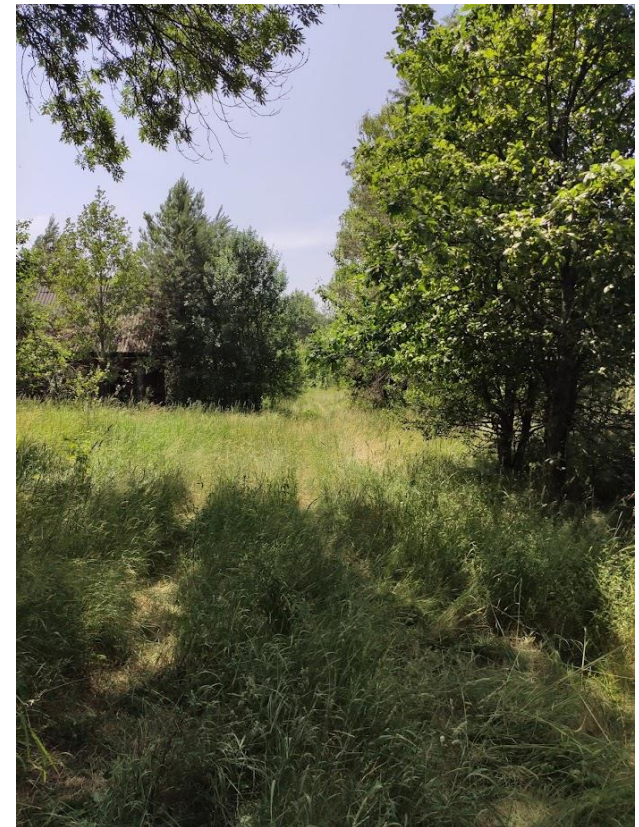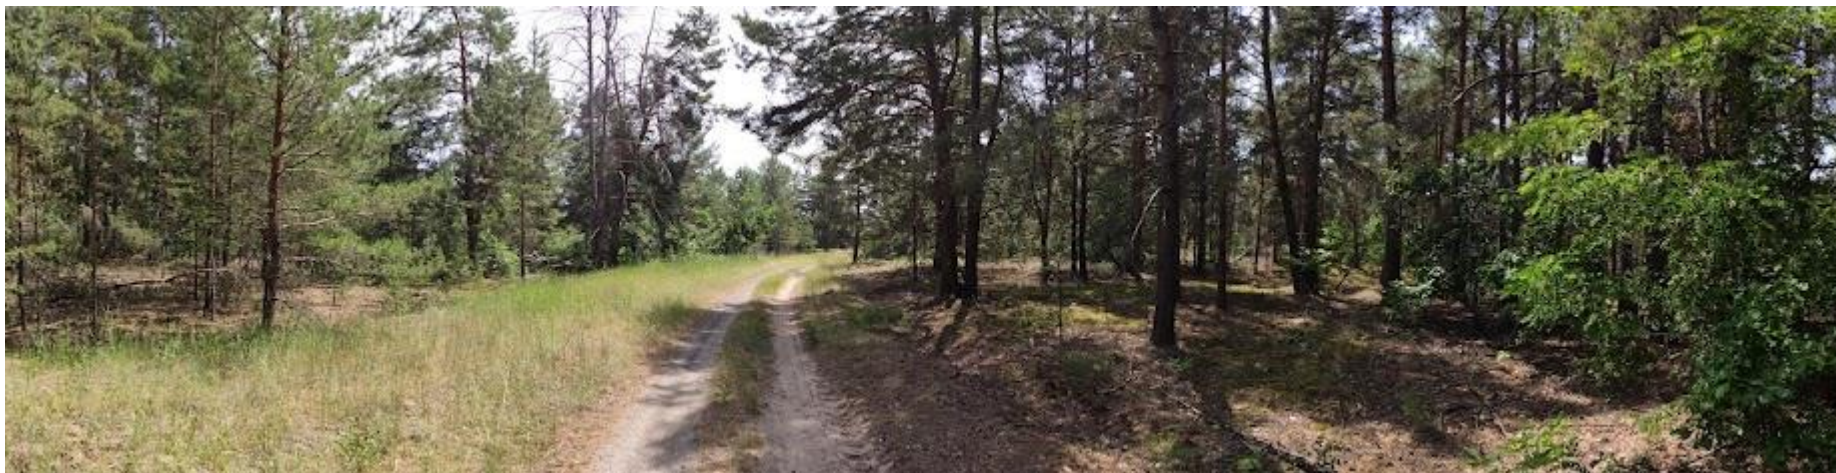

Supplement: s1 [file s1]
