# Supplementary material for: Arabidopsis thaliana Accessions from the Chernobyl Exclusion Zone Show Decreased Sensitivity to Additional Acute Irradiation
Source: MDPI journal article supplement (doi:10.3390/plants11223142), 2022-11-17

**Figure S2.** The enriched GO terms for downregulated genes in the chronically irradiated *A. thaliana* accession VS-0 in comparison with the reference accession Bab-0 (Molecular Function dictionary)

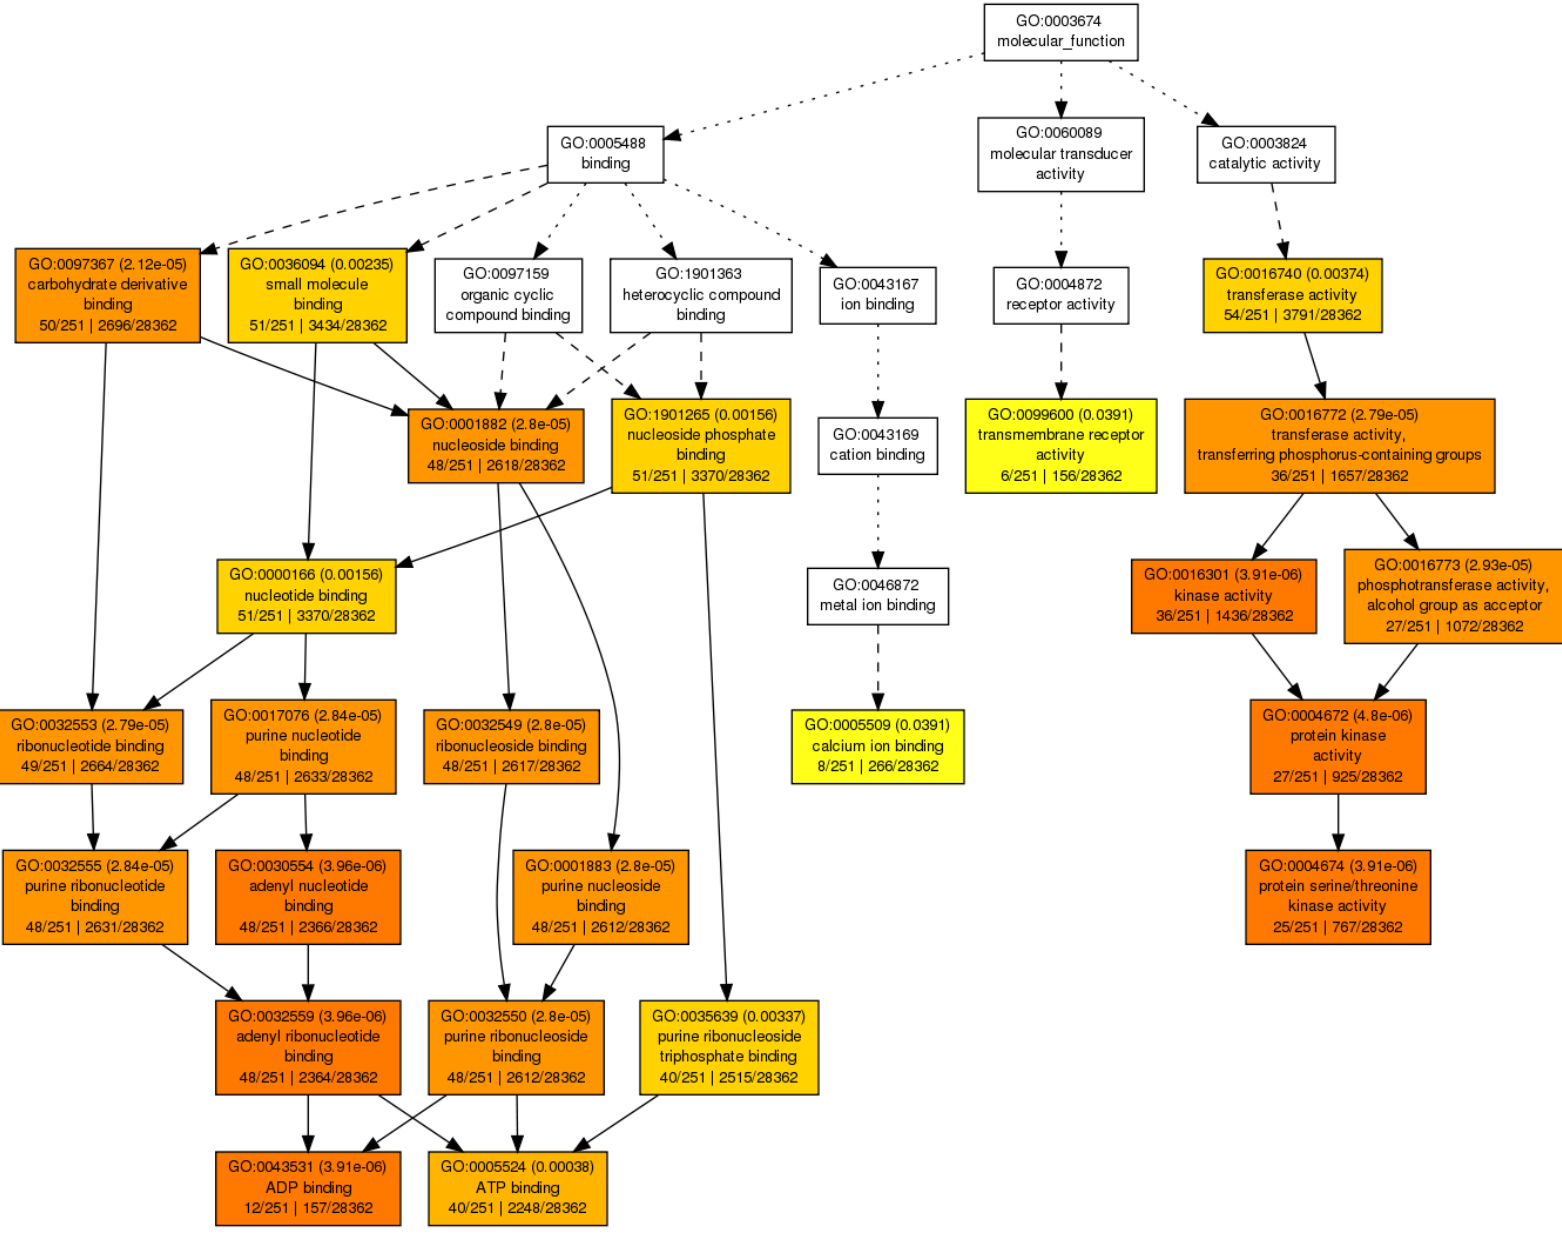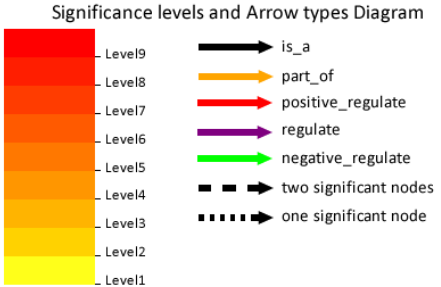

**Figure S3.** The enriched GO terms for upregulated genes in the chronically irradiated *A. thaliana* accession Masa-0 in comparison with the reference accession Bab-0 (Biological Process dictionary)

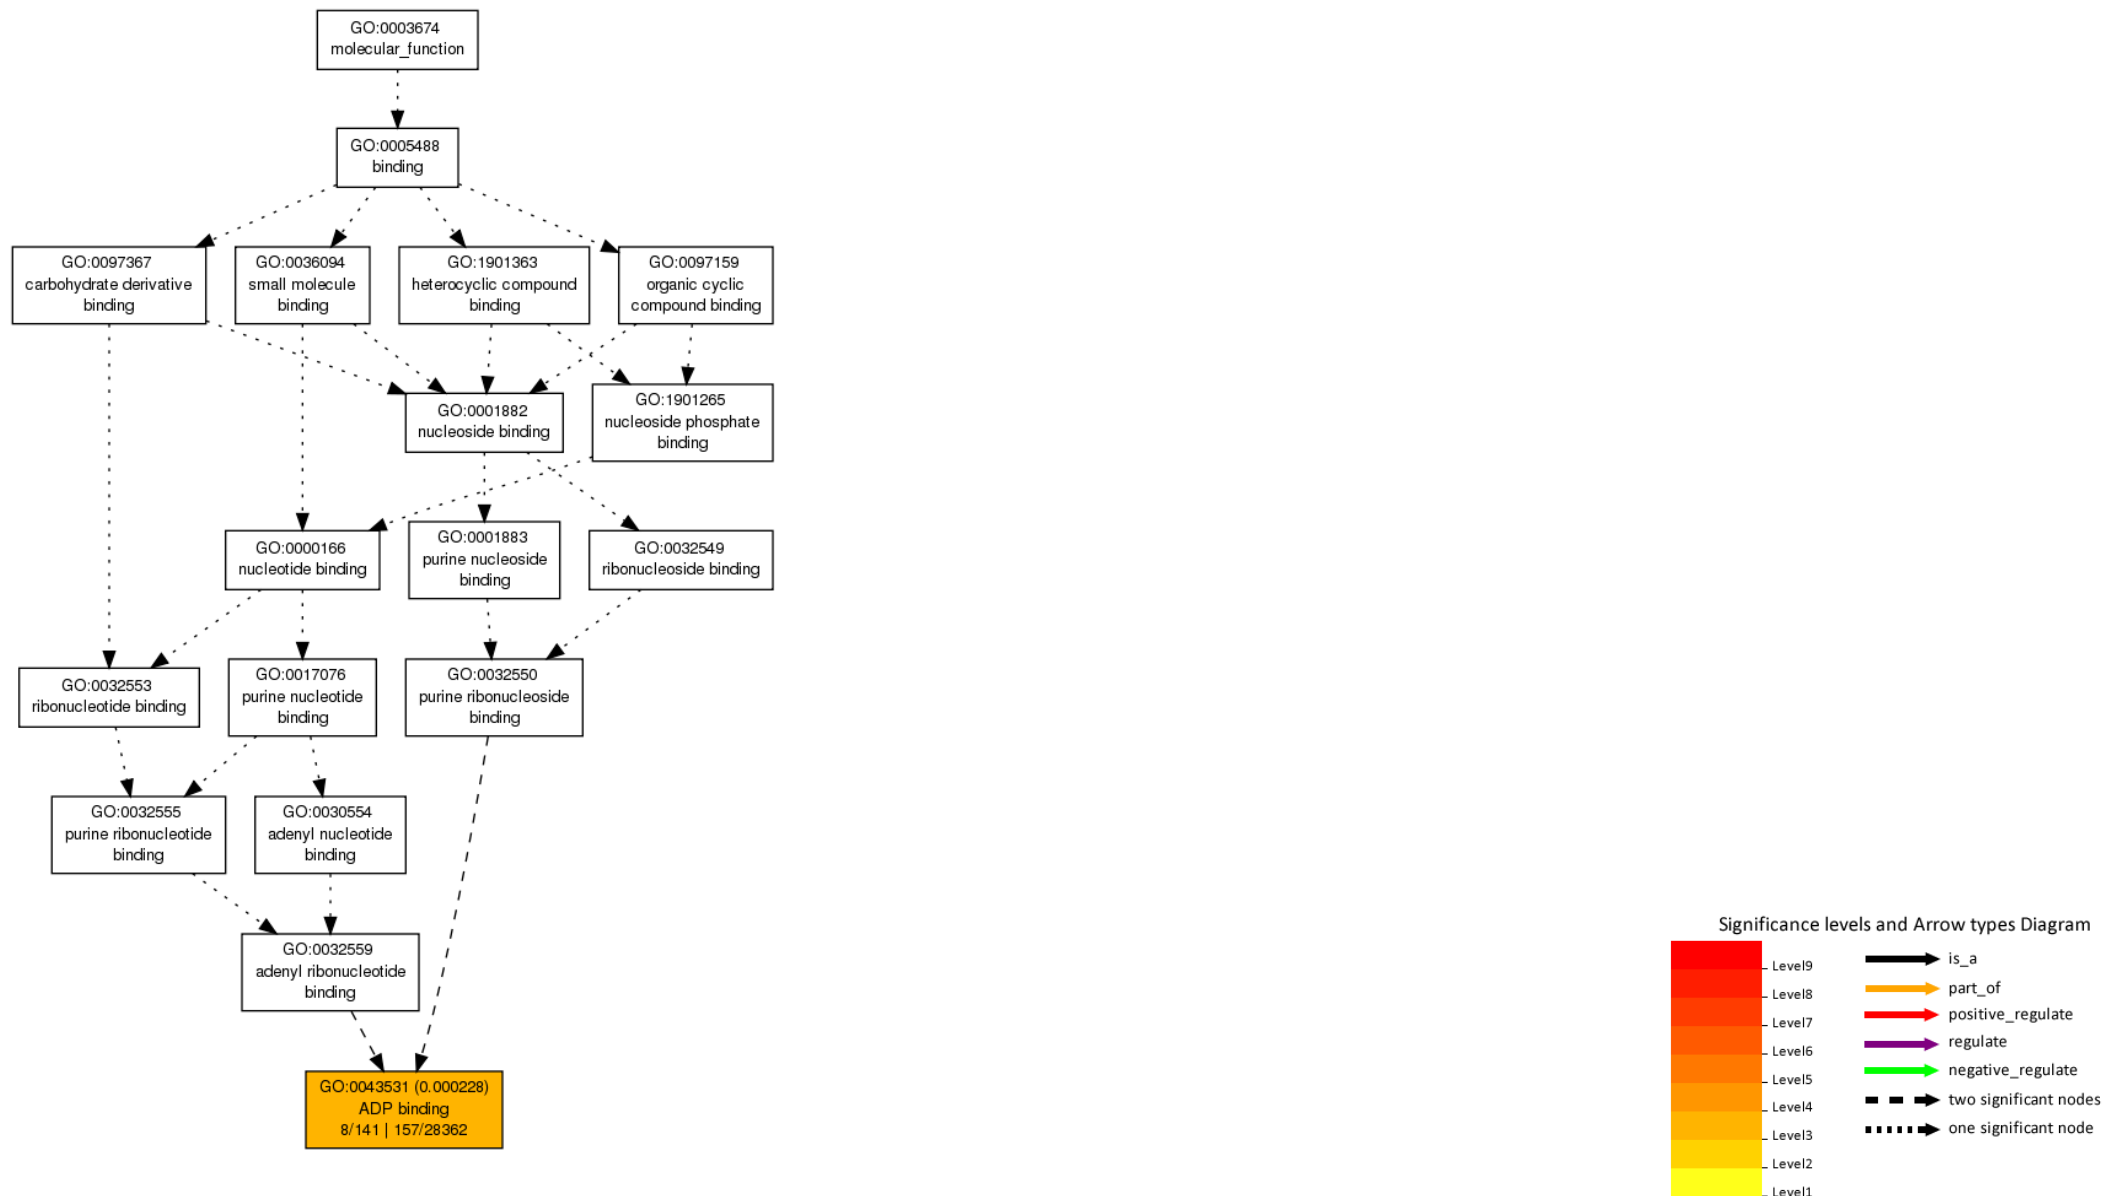

**Figure S4.** The enriched GO terms for downregulated genes in the chronically irradiated *A. thaliana* accession Masa-0 in comparison with the reference accession Bab-0 (Molecular Function dictionary)

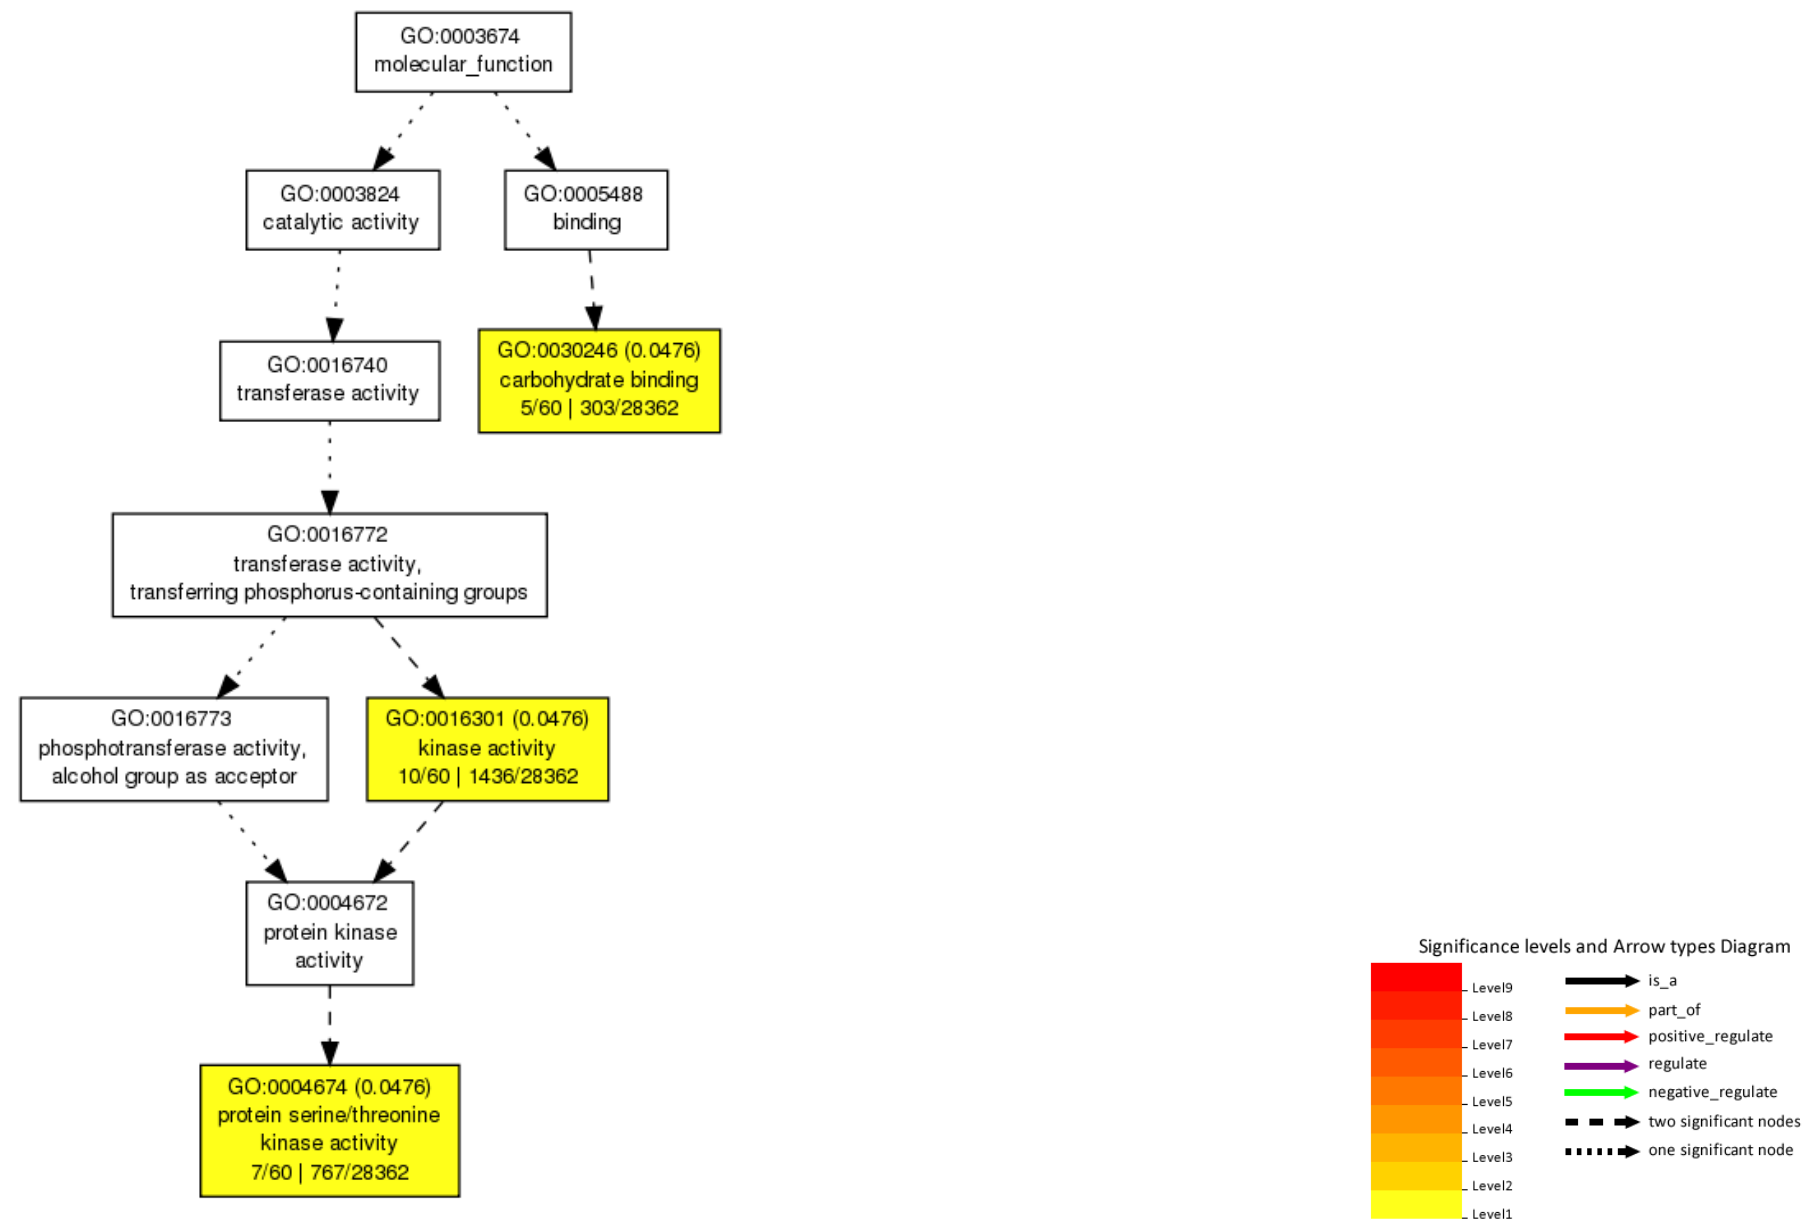



**Figure S6.** The enriched GO terms for downregulated genes after additional  $\gamma$ -irradiation of seeds from the accession Bab-0 in comparison with the reference non-irradiated seeds of the same accession (Biological Process dictionary)

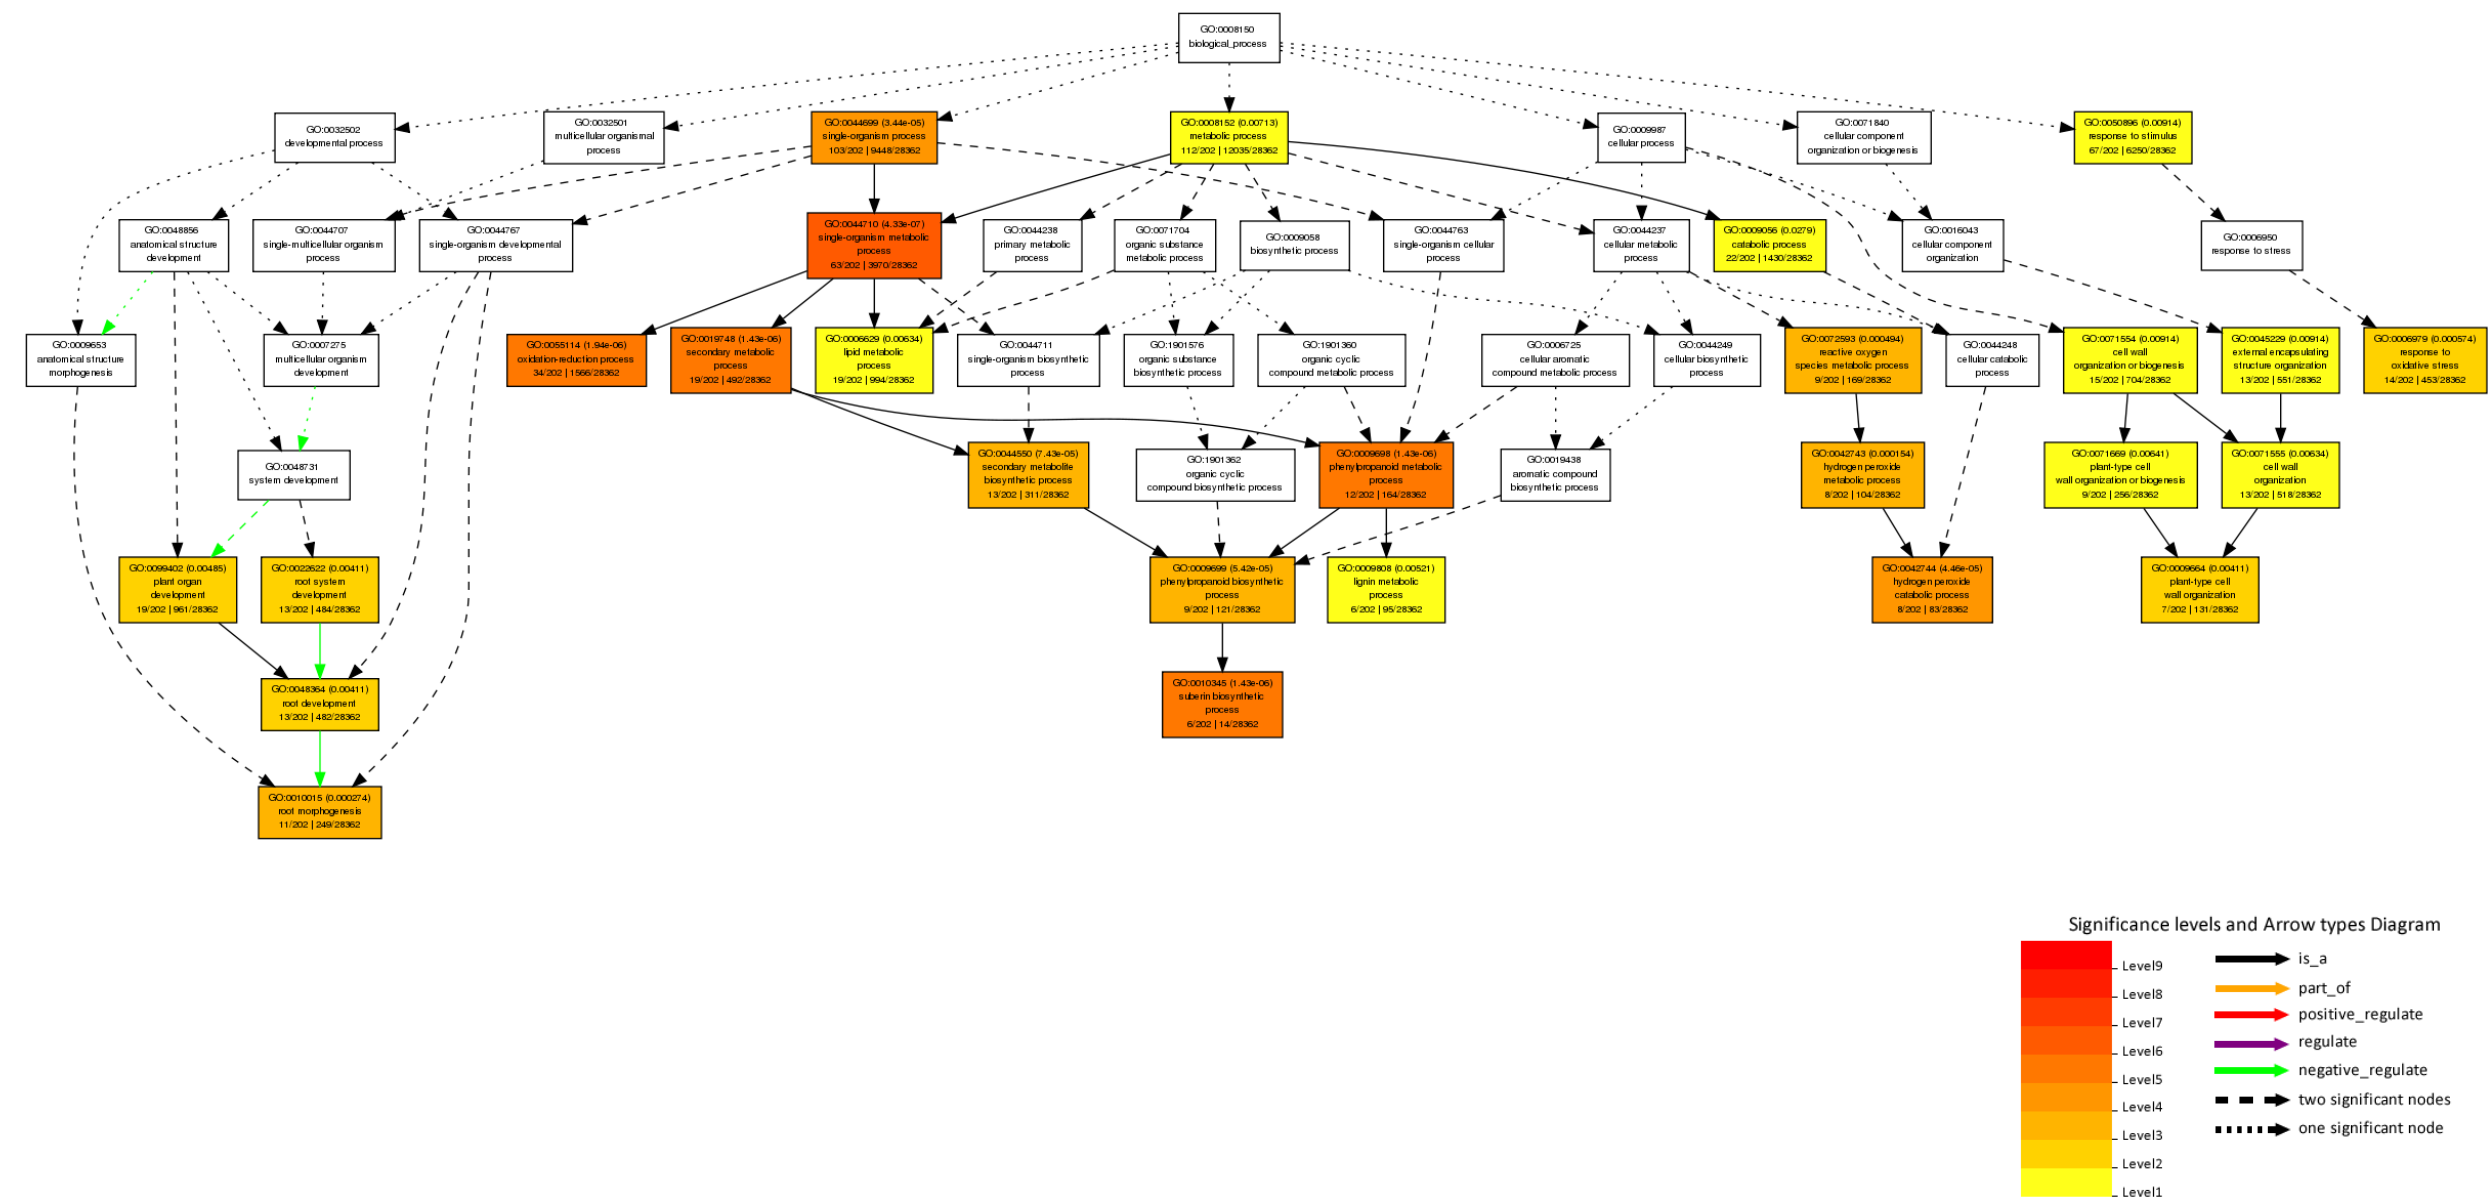

**Figure S7.** The enriched GO terms for upregulated genes after additional  $\gamma$ -irradiation of seeds from the accession Bab-0 in comparison with the reference non-irradiated seeds of the same accession (Molecular Function dictionary)

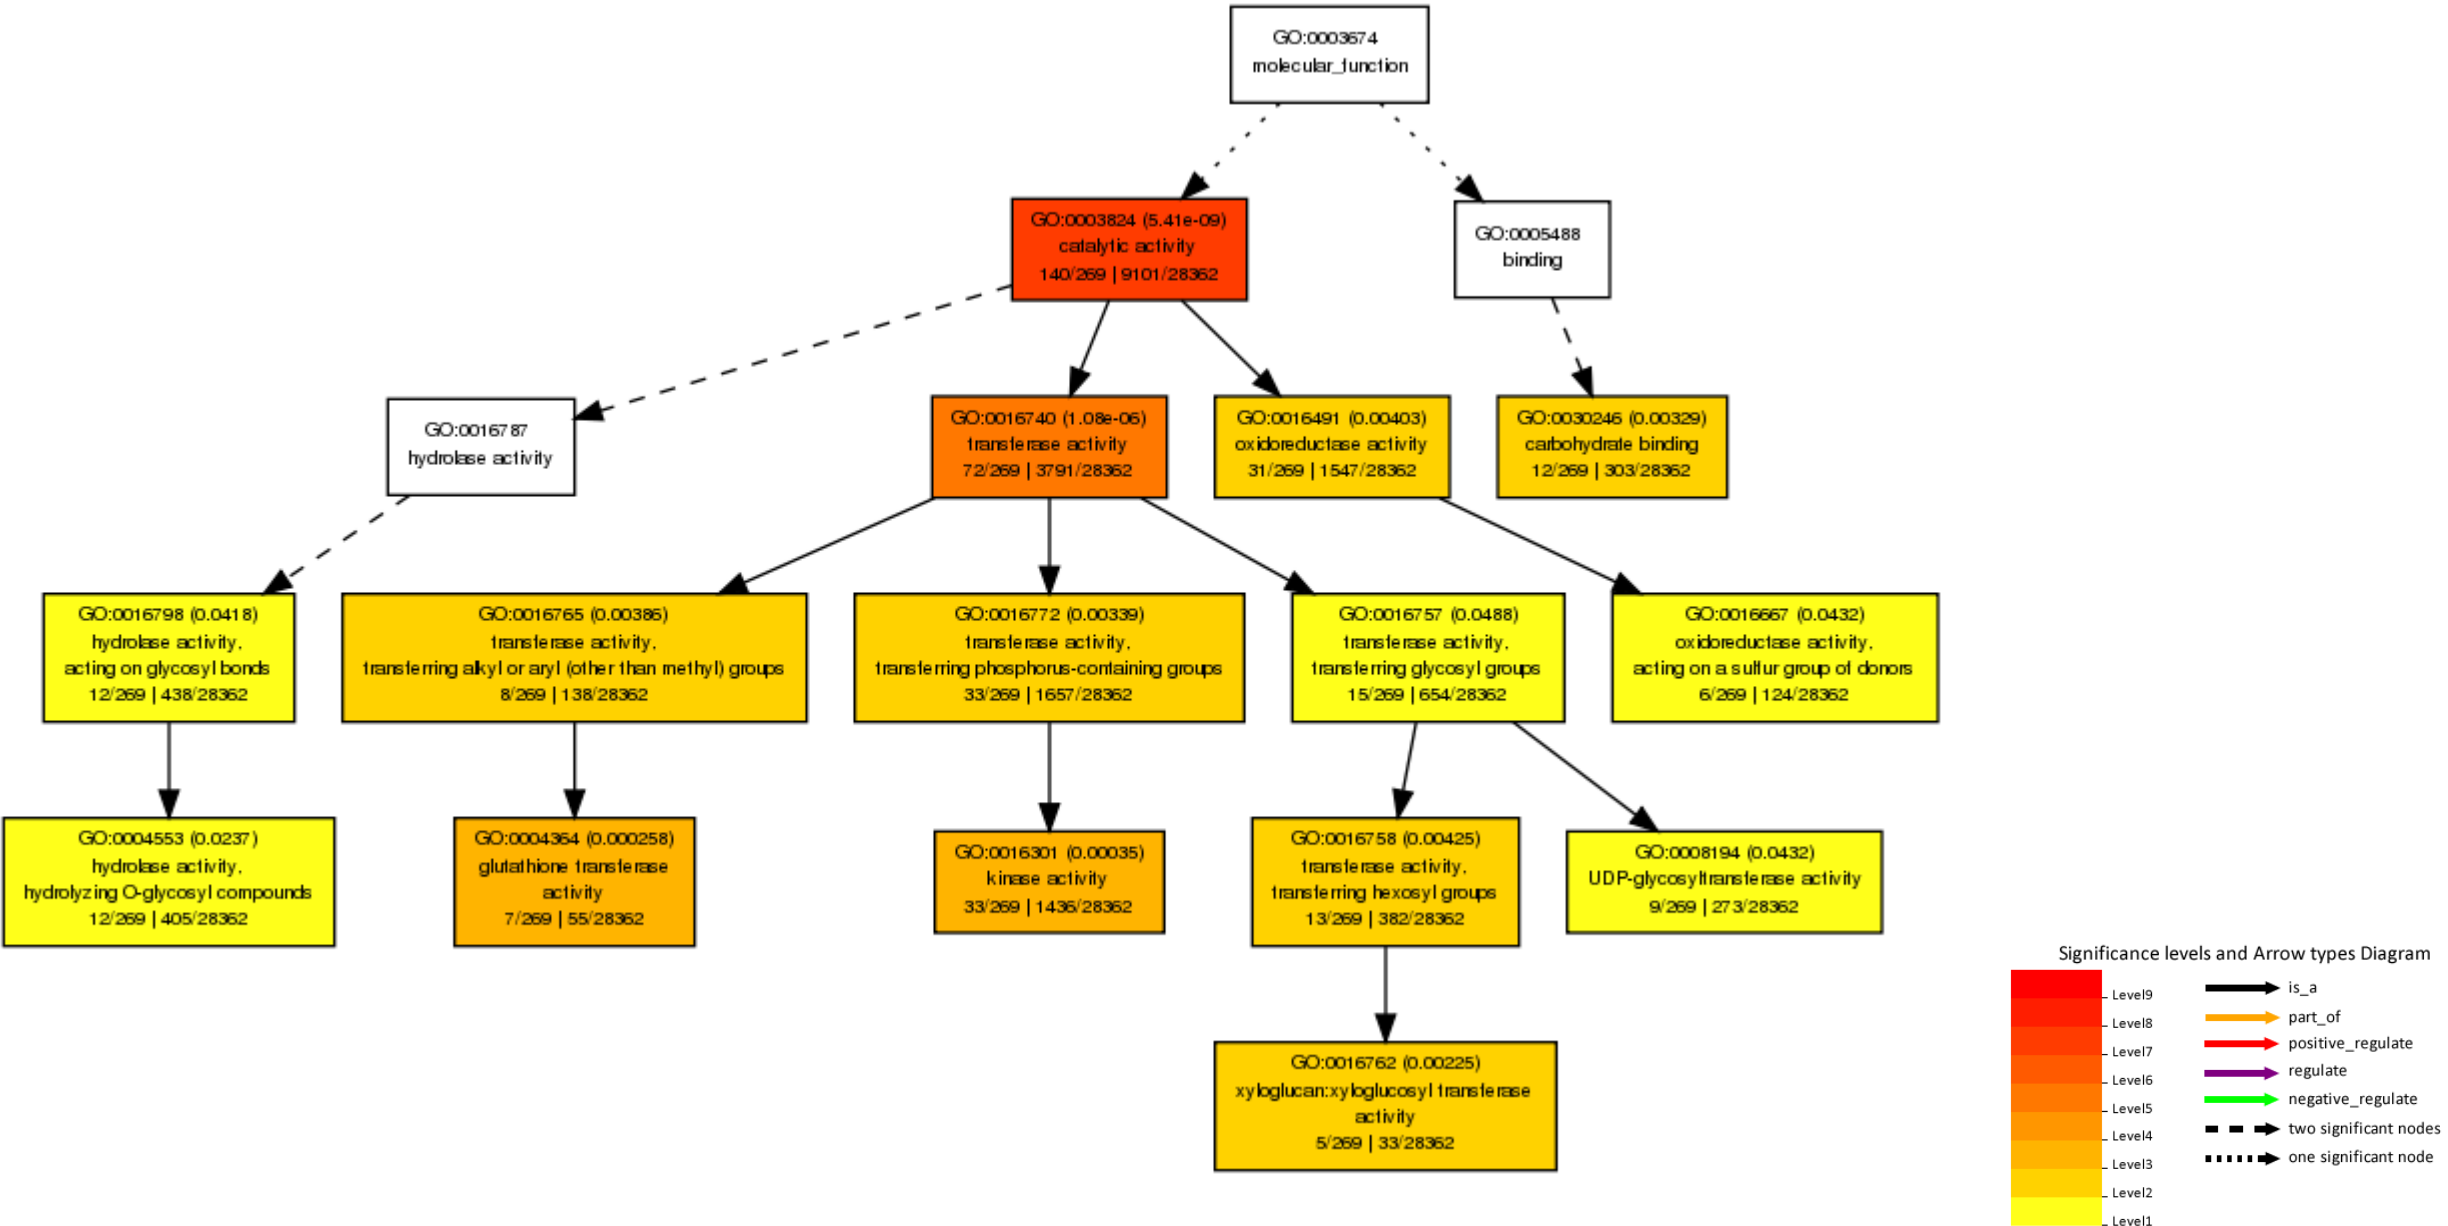

**Figure S8.** The enriched GO terms for downregulated genes after additional  $\gamma$ -irradiation of seeds from the accession Bab-0 in comparison with the reference non-irradiated seeds of the same accession (Molecular Function dictionary)

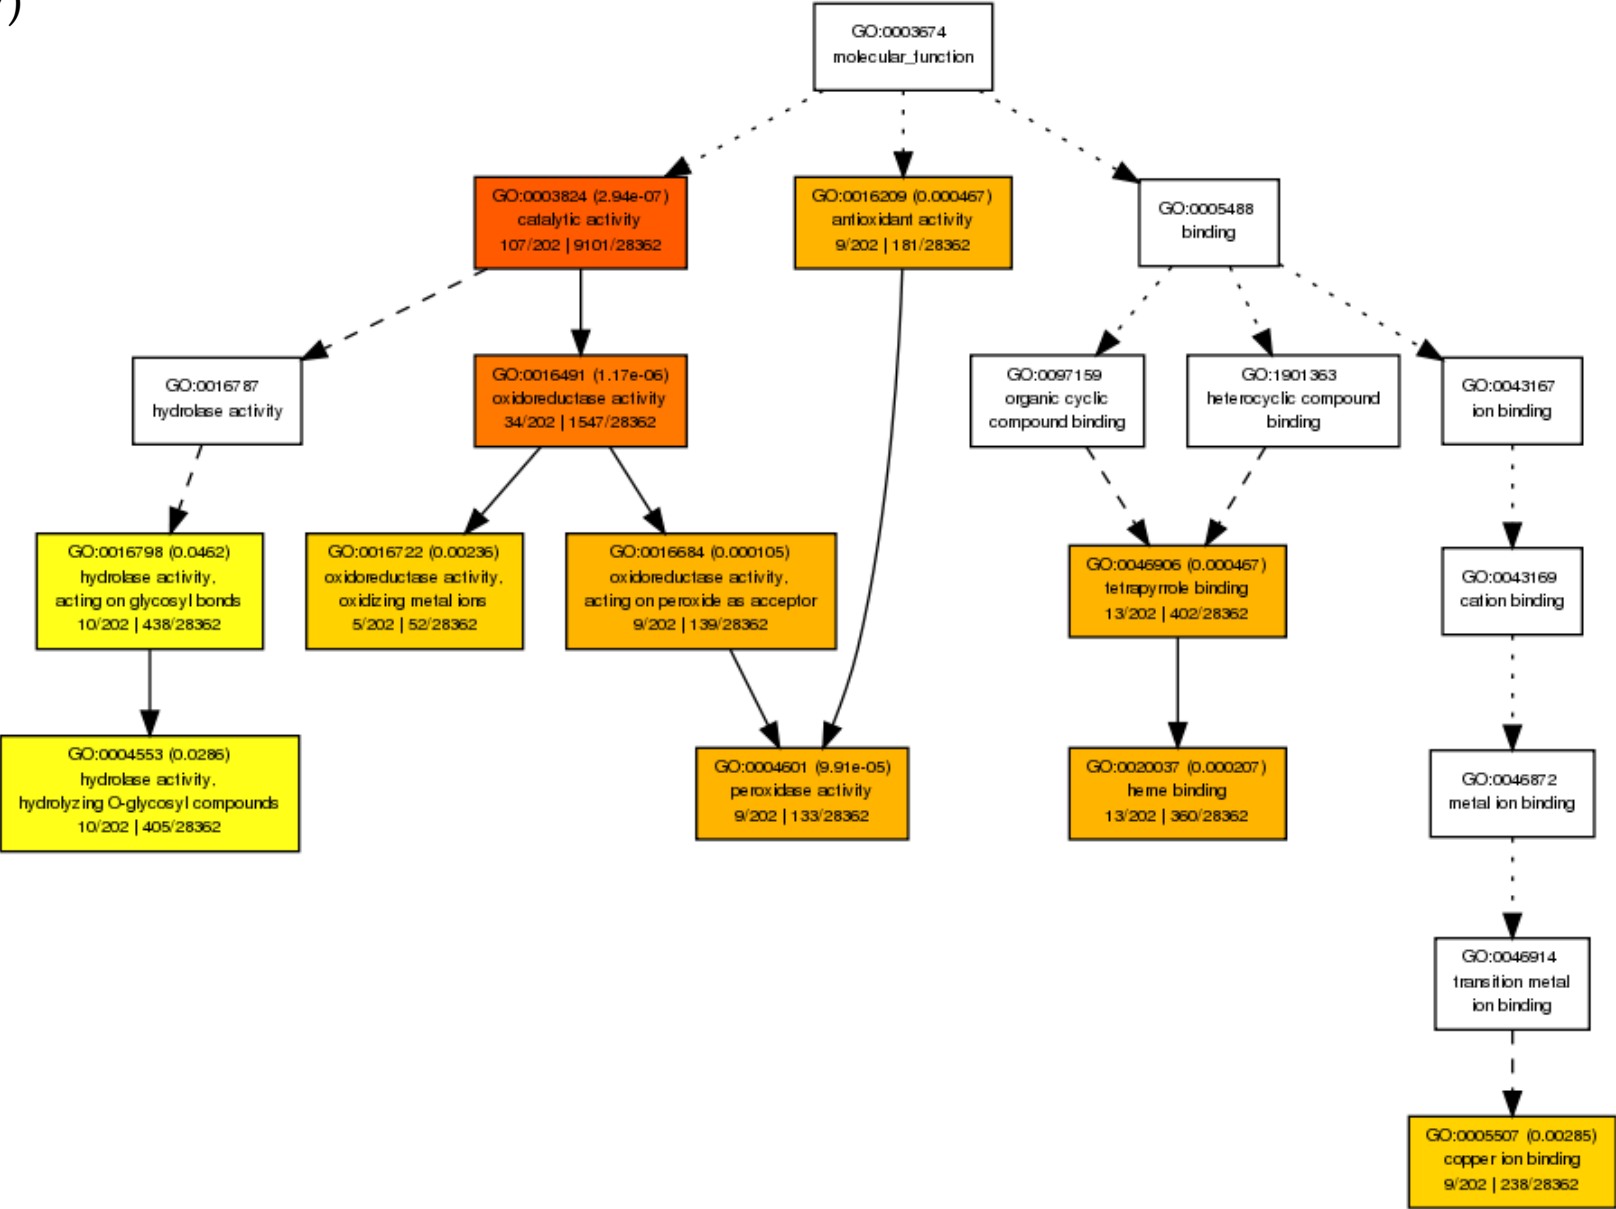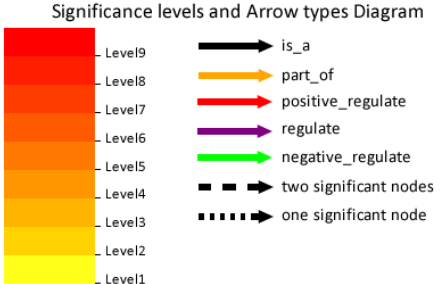



**Figure S9.** The enriched GO terms for upregulated genes after additional  $\gamma$ -irradiation of seeds from the accession Bab-0 in comparison with the reference non-irradiated seeds of the same accession (Cellular Component dictionary)

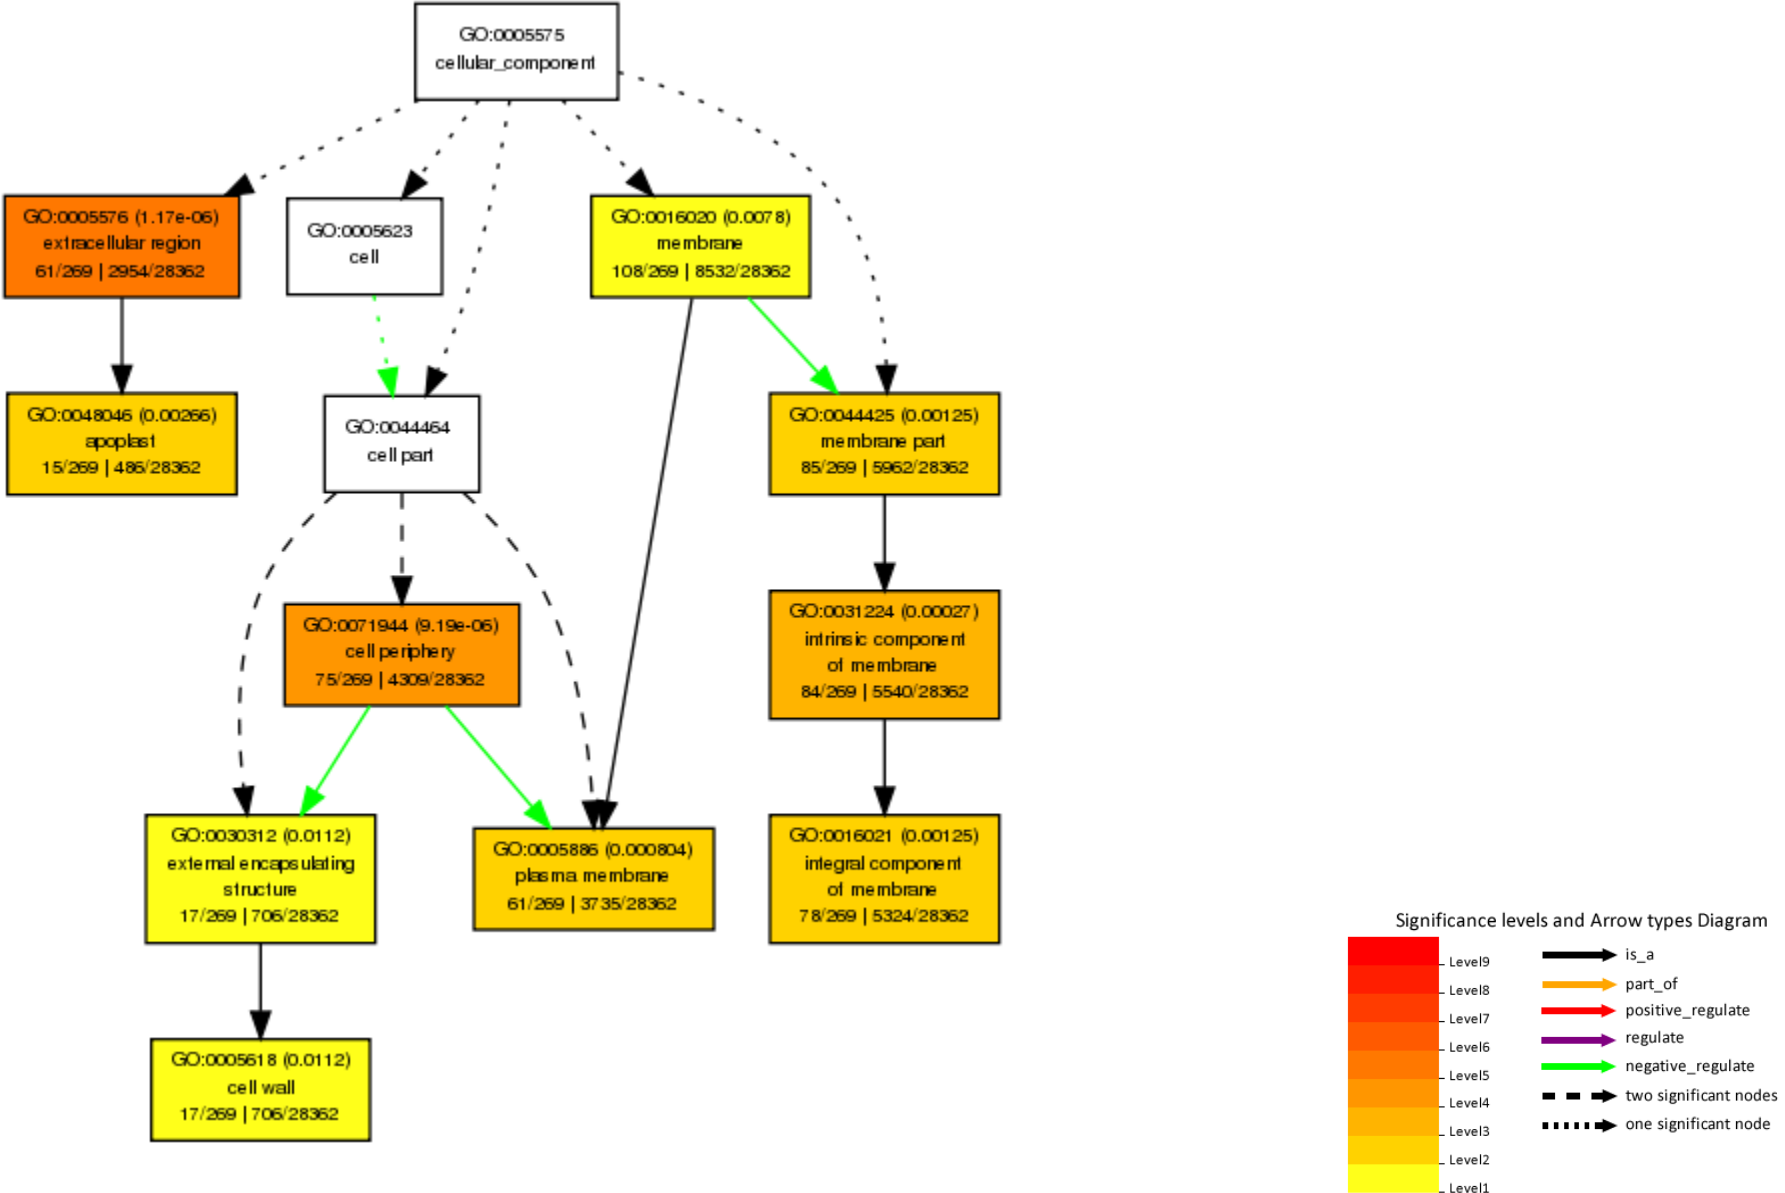

**Figure S10.** The enriched GO terms for downregulated genes after additional  $\gamma$ -irradiation of seeds from the accession Bab-0 in comparison with the reference non-irradiated seeds of the same accession (Cellular Component dictionary)

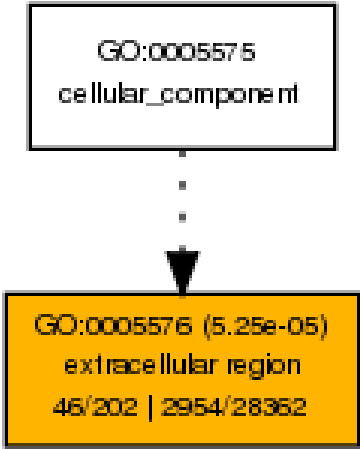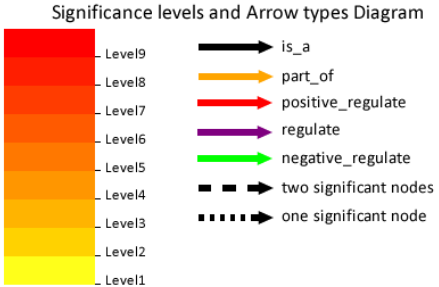

**Figure S11.** The enriched GO terms for upregulated genes after additional  $\gamma$ -irradiation of seeds from the accession VS-0 in comparison with the seeds of the same accession without acute irradiation (Biological Process dictionary)

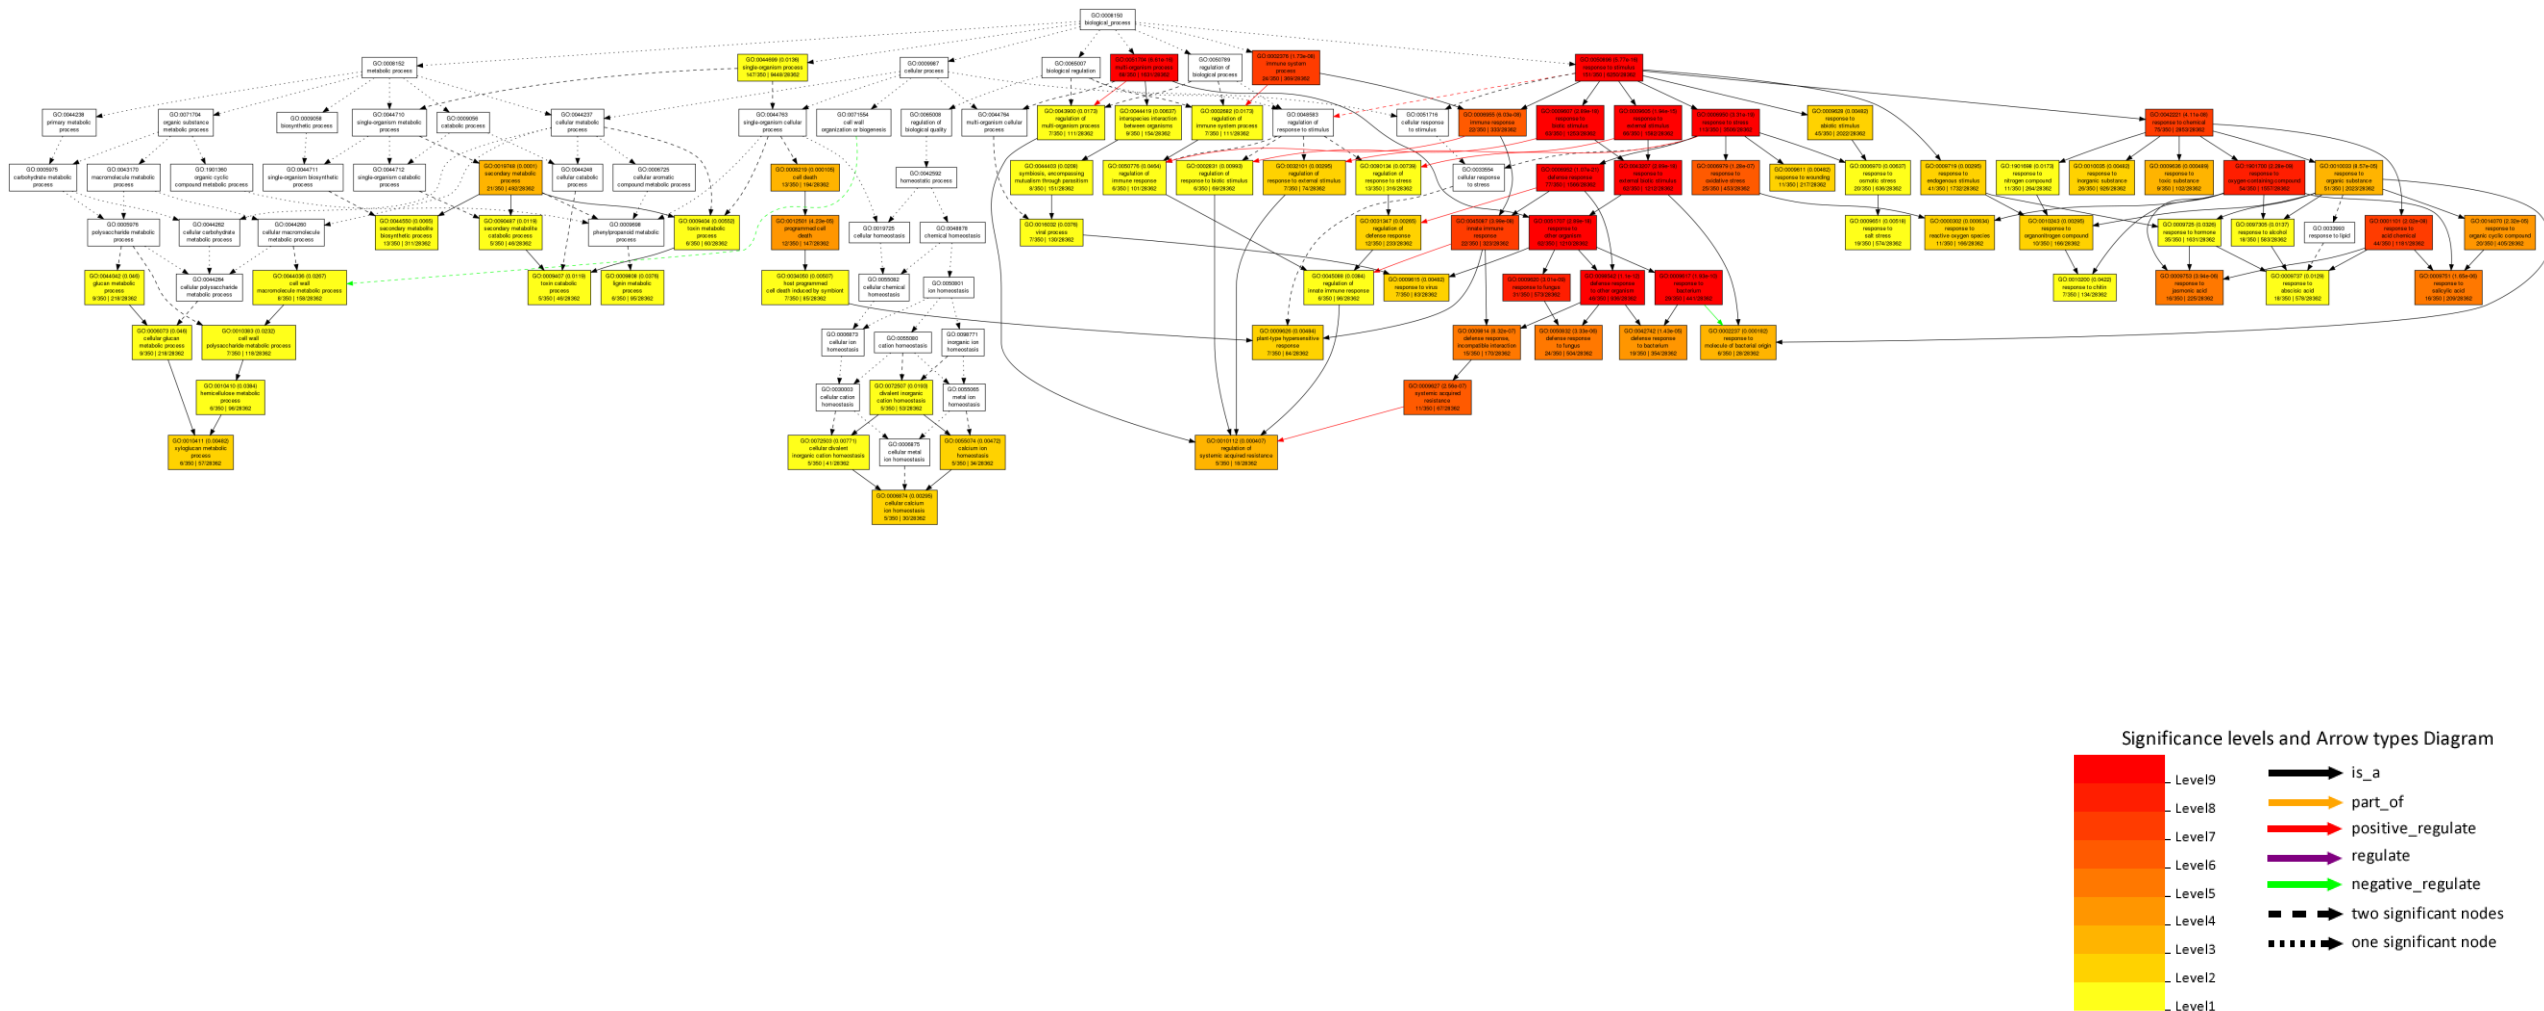

**Figure S12.** The enriched GO terms for downregulated genes after additional  $\gamma$ -irradiation of seeds from the accession VS-0 in comparison with the seeds of the same accession without acute irradiation (Biological Process dictionary)

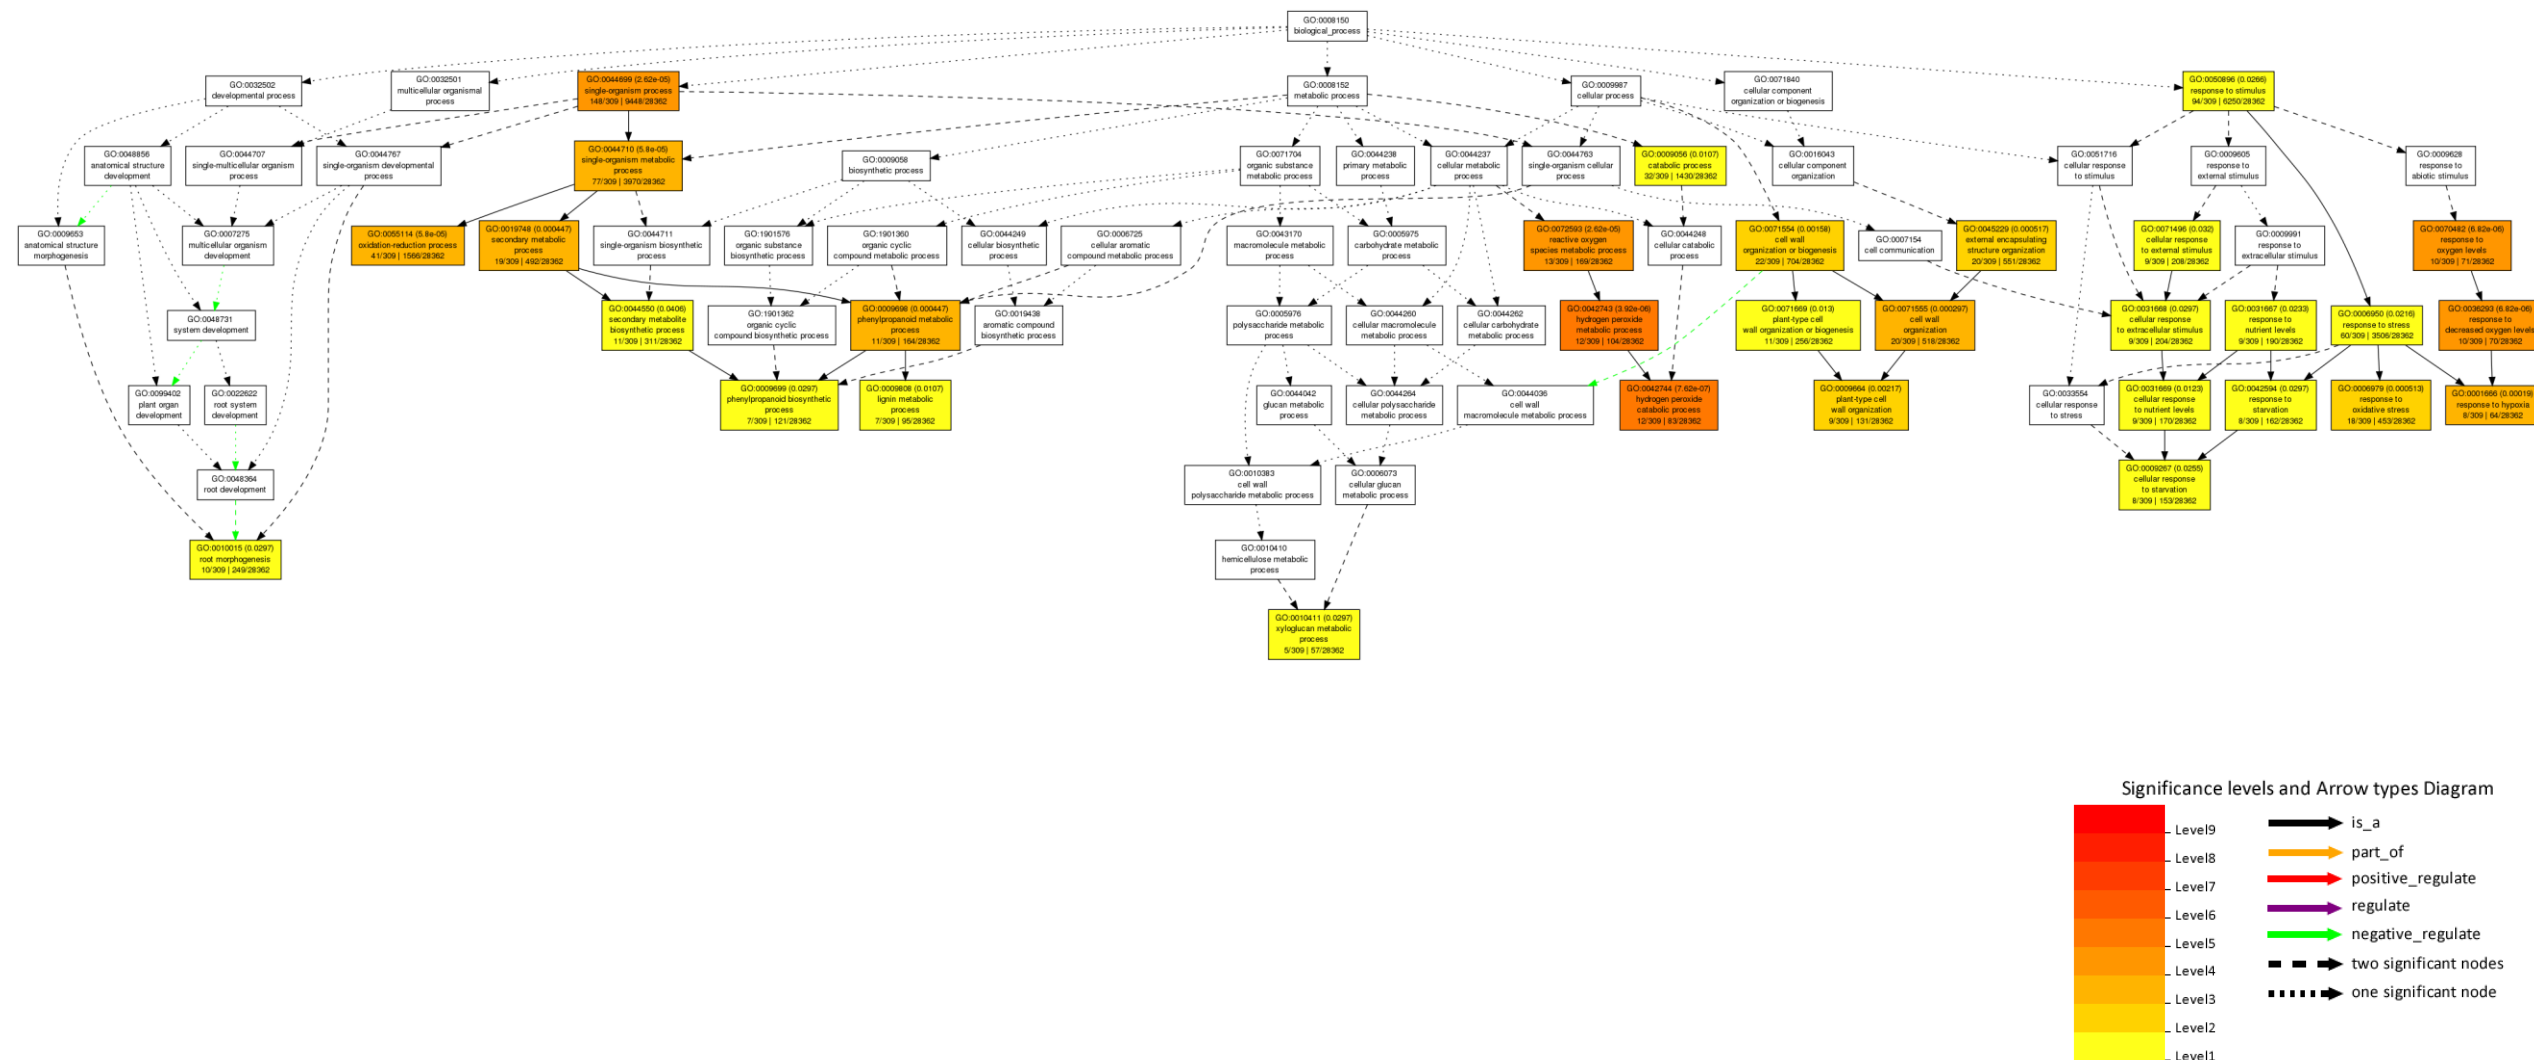

**Figure S13.** The enriched GO terms for upregulated genes after additional  $\gamma$ -irradiation of seeds from the accession VS-0 in comparison with the seeds of the same accession without acute irradiation (Molecular Function dictionary)

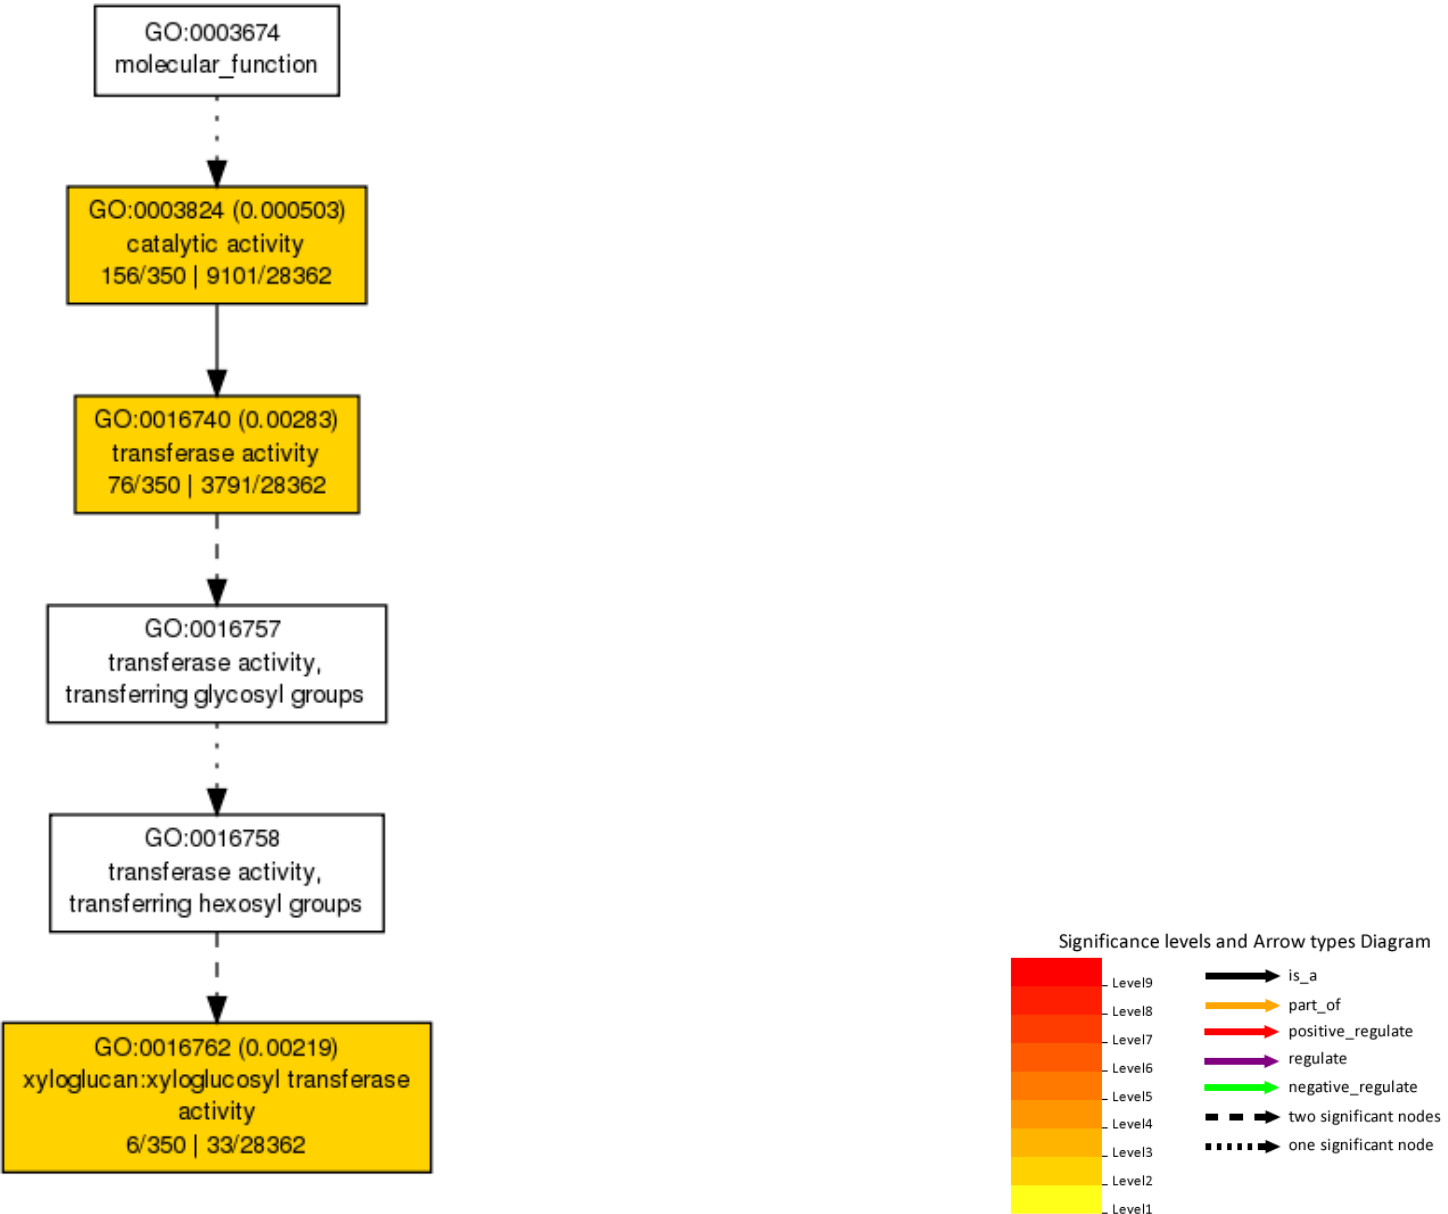

**Figure S14.** The enriched GO terms for downregulated genes after additional  $\gamma$ -irradiation of seeds from the accession VS-0 in comparison with the seeds of the same accession without acute irradiation (Molecular Function dictionary)

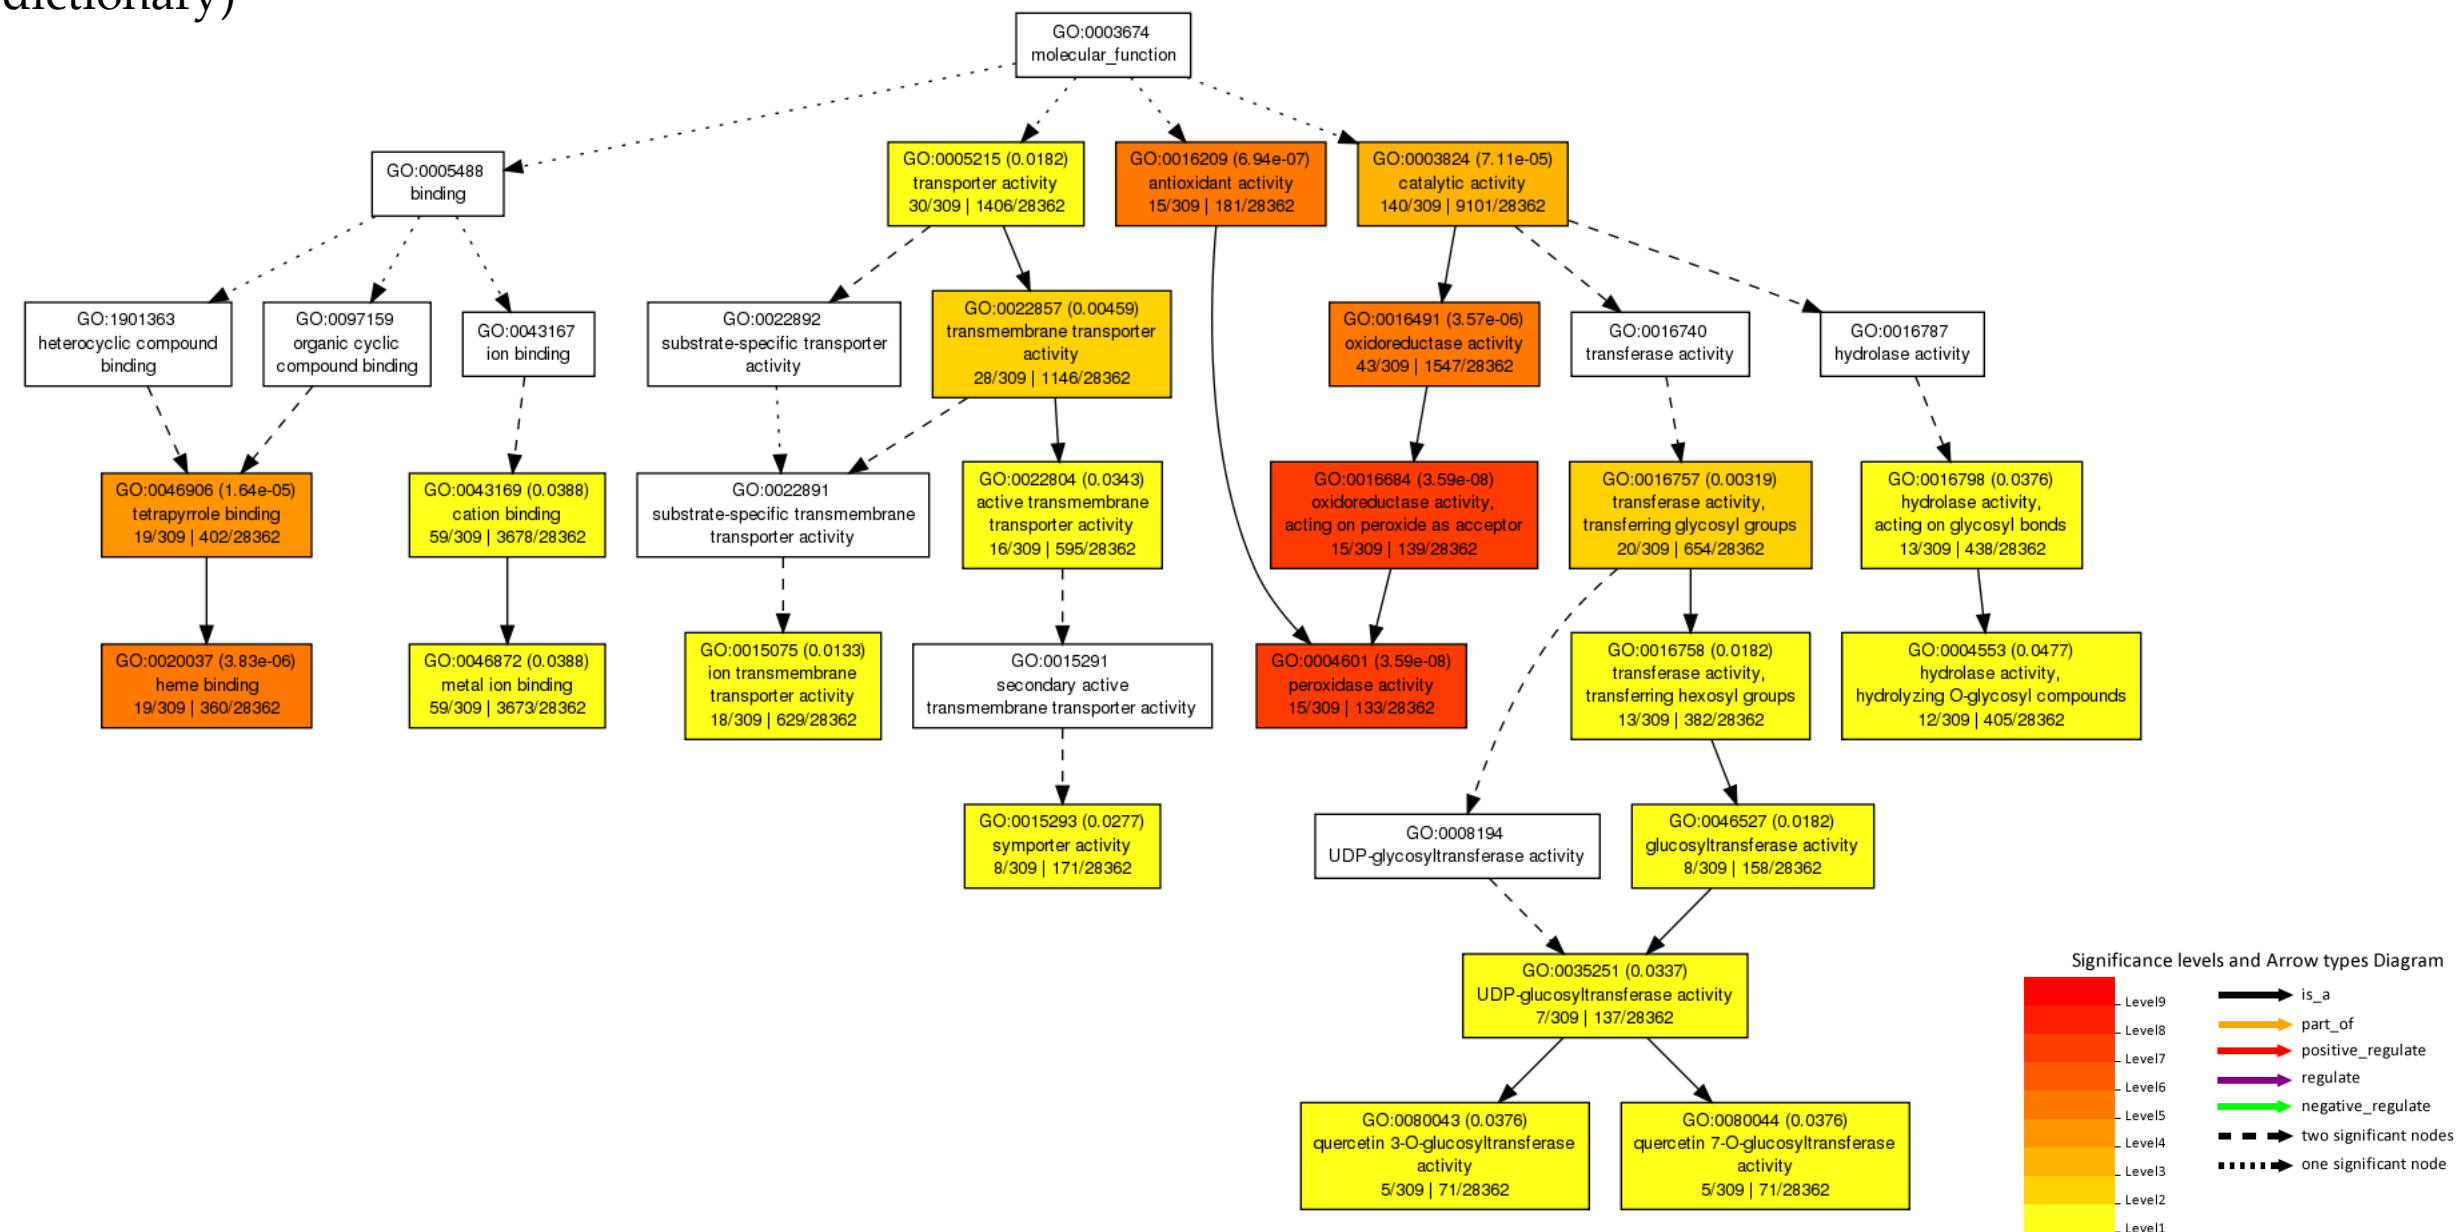

**Figure S15.** The enriched GO terms for upregulated genes after additional  $\gamma$ -irradiation of seeds from the accession VS-0 in comparison with the seeds of the same accession without acute irradiation (Cellular Component dictionary)

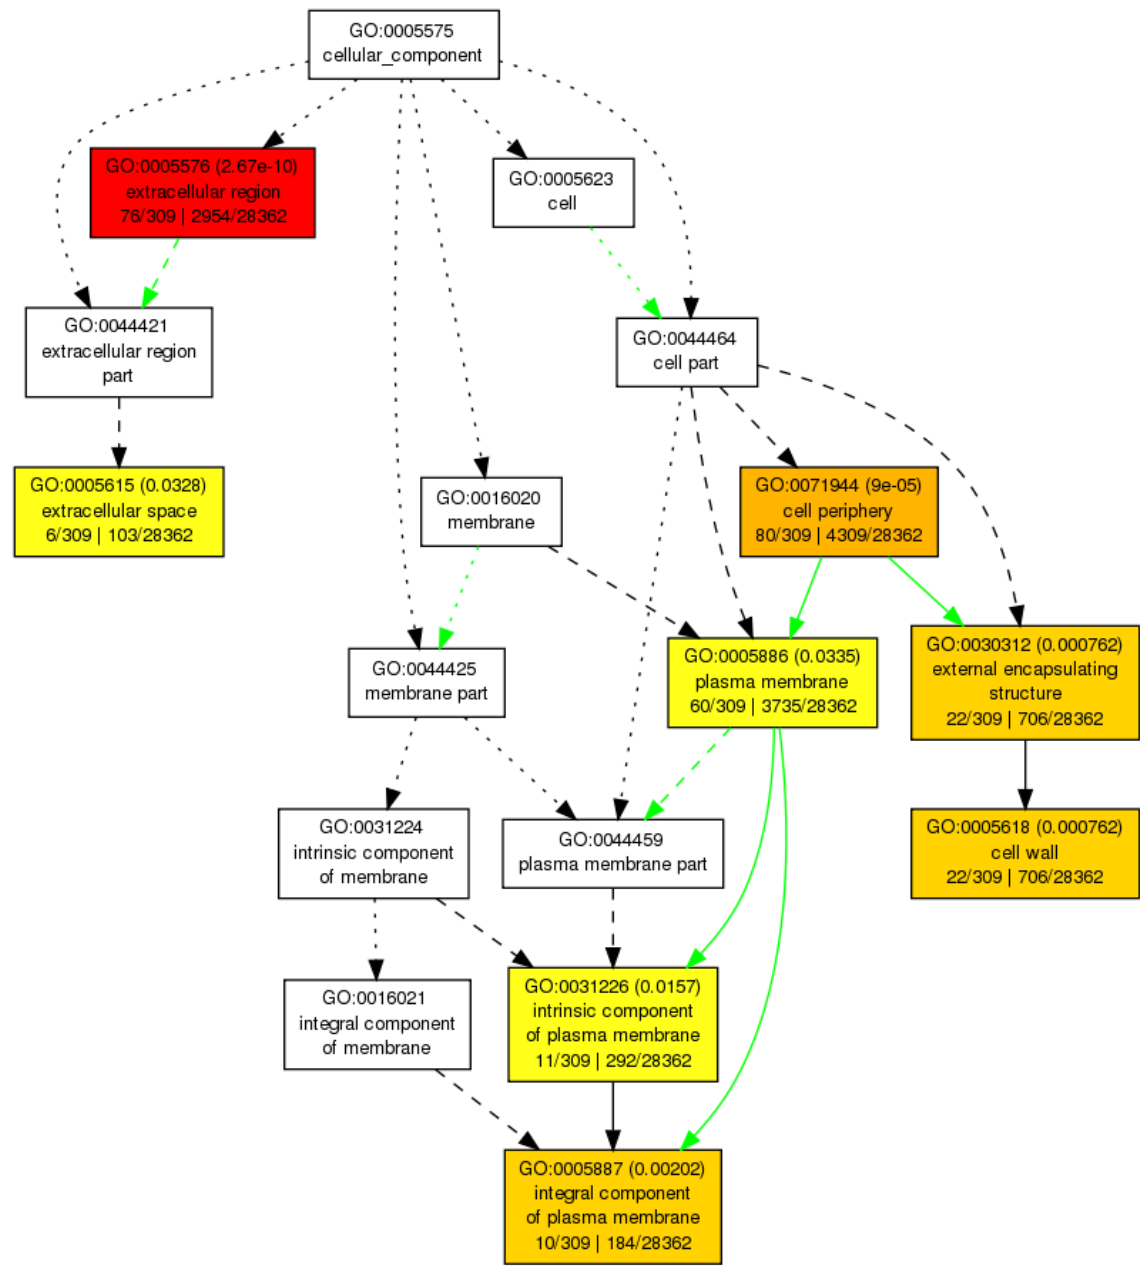

Significance levels and Arrow types Diagram

|        |                       |
|--------|-----------------------|
| Level9 | is_a                  |
| Level8 | part_of               |
| Level7 | positive_regulate     |
| Level6 | regulate              |
| Level5 | negative_regulate     |
| Level4 | two significant nodes |
| Level3 | one significant node  |
| Level2 |                       |
| Level1 |                       |

**Figure S16.** The enriched GO terms for downregulated genes after additional  $\gamma$ -irradiation of seeds from the accession VS-0 in comparison with the seeds of the same accession without acute irradiation (Cellular Component dictionary)

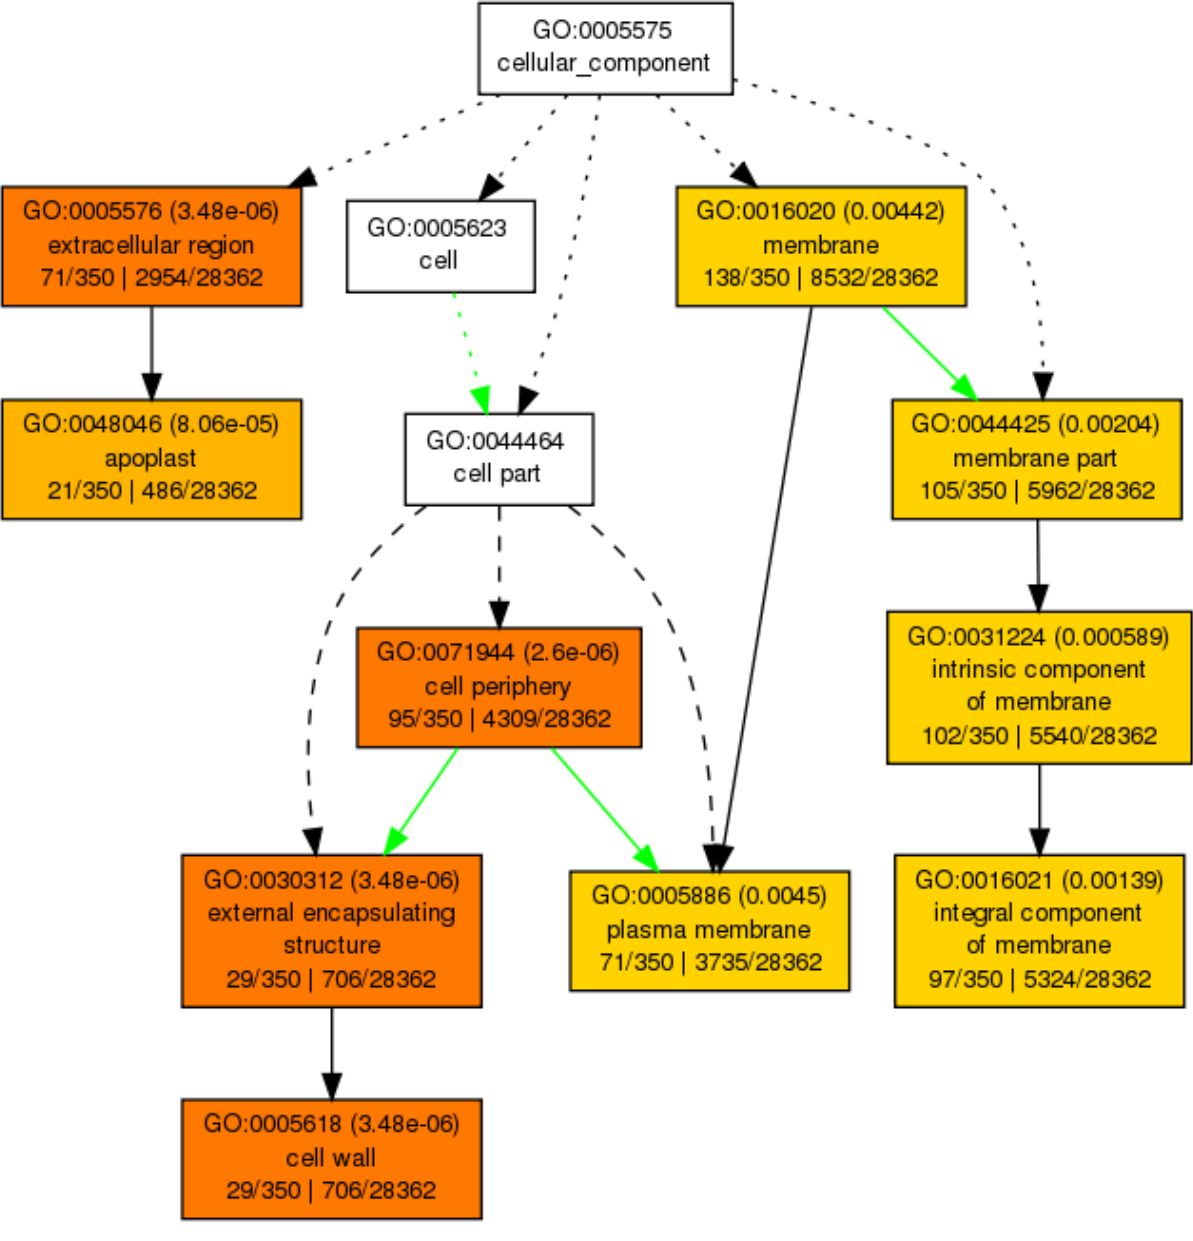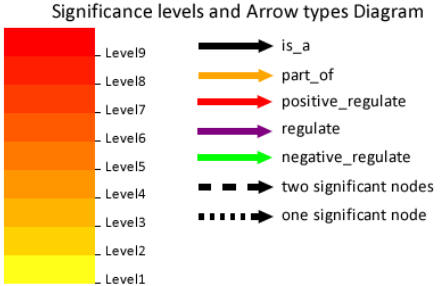



**Figure S17.** The enriched GO terms for upregulated genes after additional  $\gamma$ -irradiation of seeds from the accession Masa-0 in comparison with the seeds of the same accession without acute irradiation (Biological Process dictionary)

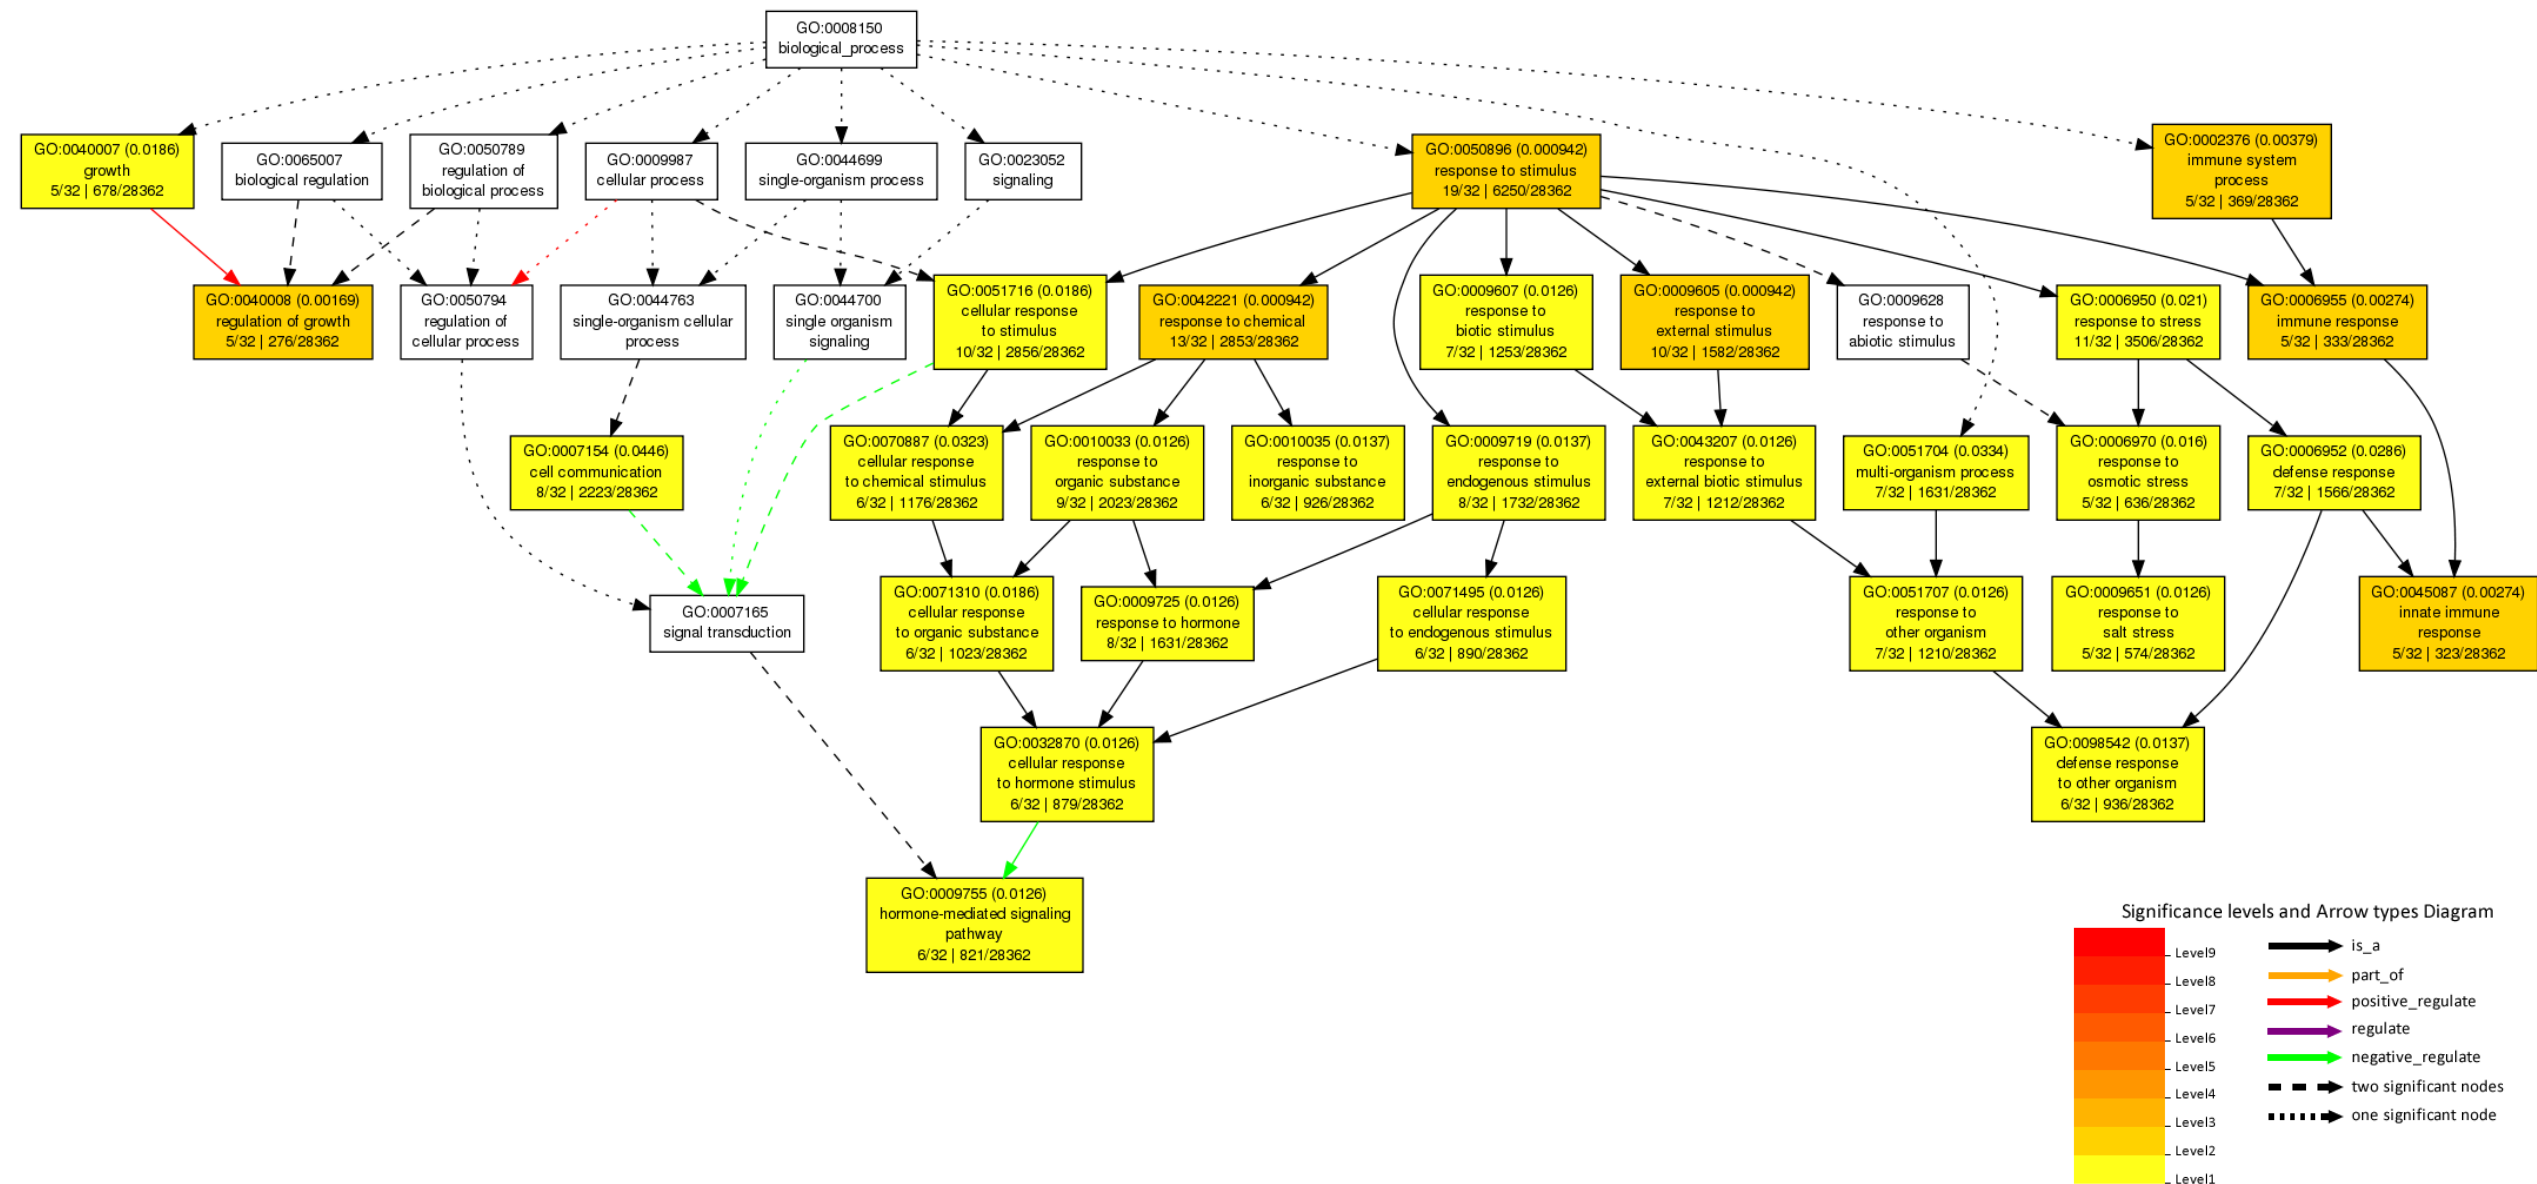

**Figure S18.** The enriched GO terms for upregulated genes after additional  $\gamma$ -irradiation of seeds from the accession Masa-0 in comparison with the seeds of the same accession without acute irradiation(Cellular Component dictionary)

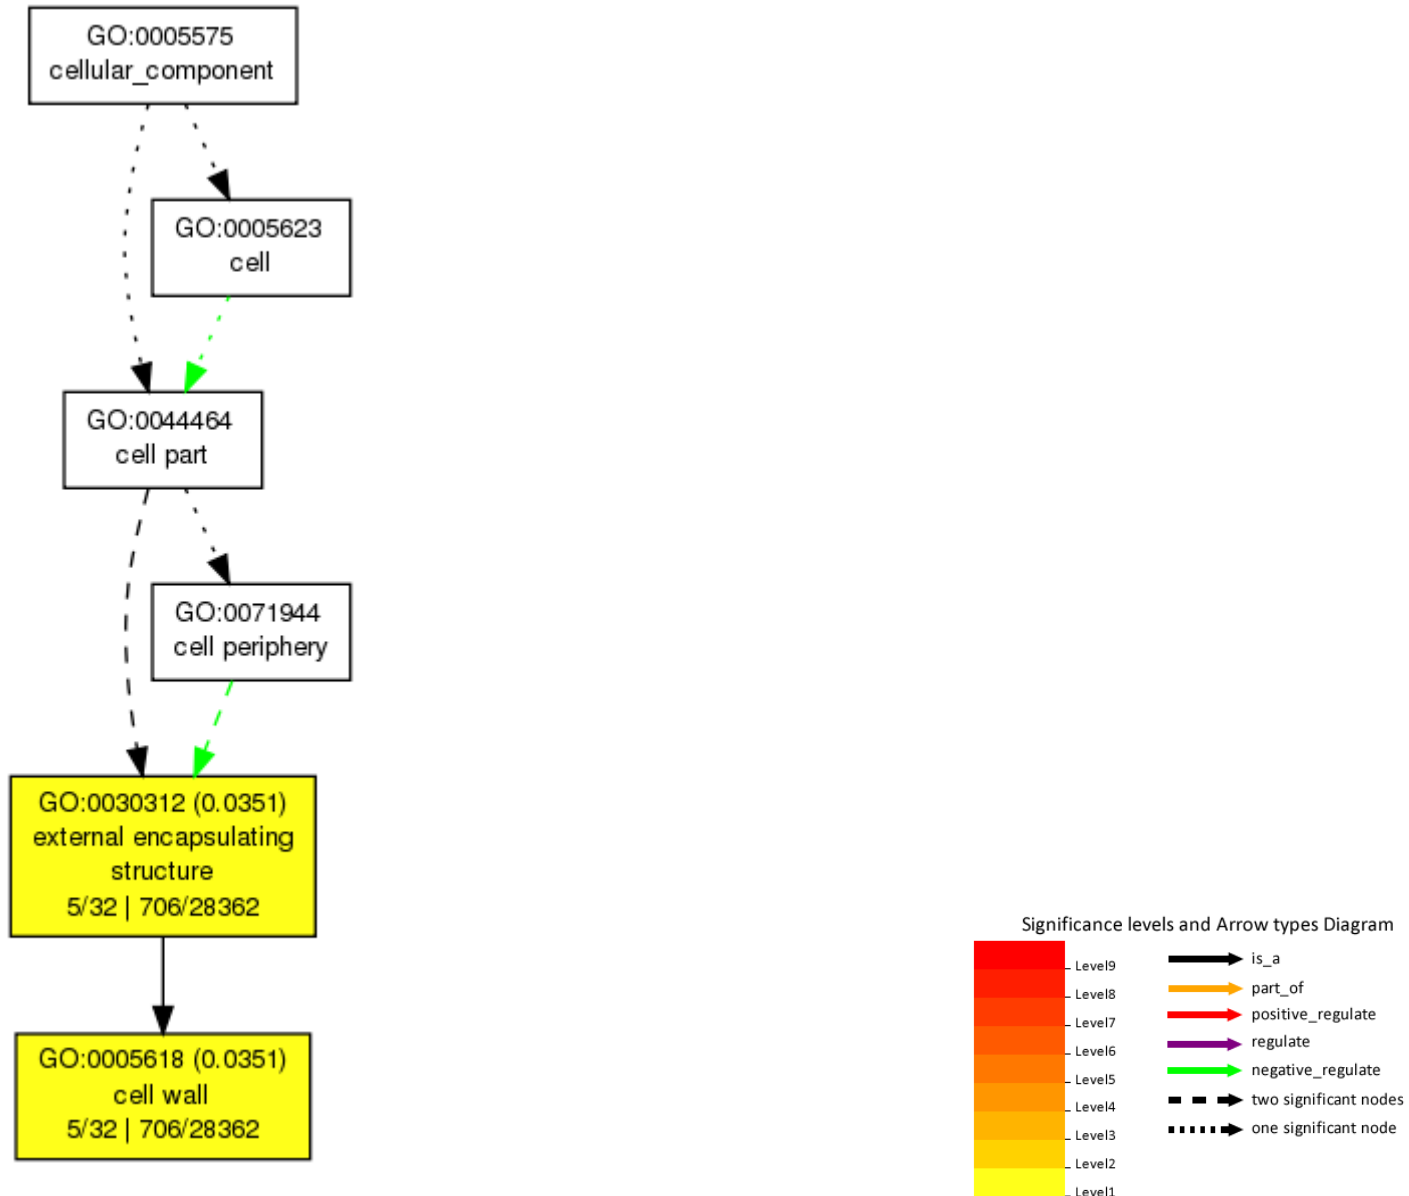

Supplement: s1 [file s1]
