# Supplementary material for: Arabidopsis thaliana Accessions from the Chernobyl Exclusion Zone Show Decreased Sensitivity to Additional Acute Irradiation
Source: Plants (Basel). 2022 Nov 17;11(22):3142. doi: 10.3390/plants11223142 (PMC9697804; doi:10.3390/plants11223142)
Supplement: Supplementary file 1 [file plants-11-03142-s001.zip]

Archive with 8 entries (8 files):
- Figures S1-S18.pdf
- Table S6.xlsx
- Table S5.xlsx
- Table S4.xlsx
- Table S3.xlsx
- Table S2.xlsx
- Table S1.xlsx
- Figures S19-S21.pdf
