# Supplementary material for: Arabidopsis thaliana Accessions from the Chernobyl Exclusion Zone Show Decreased Sensitivity to Additional Acute Irradiation
Source: Plants (Basel). 2022 Nov 17;11(22):3142. doi: 10.3390/plants11223142 (PMC9697804; doi:10.3390/plants11223142)
Supplement: Supplementary file 1 [file plants-11-03142-s001.zip › Table S1.xlsx]

## Sheet: General
Table S1. Sampling details, soil properties, radioactive contamination, heavy metal content at the experimental plots

## Sheet: Babchin (Bab-0)
Name:	Babchin (Bab-0)
Date:	June 2019
GPS coordinates:	N 51.79001º E030.00117º
Mean ambient dose rate (γ), μSv/h:	0.33
Mean α-particle flux density, part./(min*cm2):	1.2
Mean β-particle flux densities, part./(min*cm2):	1.2

## Sheet: Vygrebnaya Sloboda (VS-0)
Name:	Vygrebnaya Slovoda (VS-0)
Date:	June 2019
GPS coordinates:	N 51.65050º E030.13547º
Time of sampling:	10.30-10.50
Meteorological condition:	35 ºС, air humidity 40%, cloudy, slight wind
Mean ambient dose rate (γ), μSv/h:	0.6
Mean α-particle flux density, part./(min*cm2):	17
Mean β-particle flux densities, part./(min*cm2):	5.2

## Sheet: Masany (Masa-0)
Name:	Masany (Masa-0)
Date:	June 2019
GPS coordinates:	N51.51321º E030.02074º
Time of sampling:	13.25-13.35
Meteorological condition:	35 ºС, air humidity 40%, clear sky, slight wind
Mean ambient dose rate (γ), μSv/h:	3.76
Mean α-particle flux density, part./(min*cm2):	25.3
Mean β-particle flux densities, part./(min*cm2):	21.3

## Sheet: Soil properties
Soil properties on experimental plots (measured according to the National Standard (NS))
	pH	Hydrolitic acidity	Total exhangable bases	Humus	Mobile phosphorus P2O5	Mobile potassium K2O	Mobile calcium	Mobile magneseum	Mobile sodium
		mg-eqv per 100 g		%	mg/kg		mg-eqv per 100 g
Babchin	6.61	6.4	6.1 ± 0.7	1.17 ± 0.01	210.7 ± 5.2	91.0 ± 1.0	3.41 ± 0.20	0.85 ± 0.02	0.61 ± 0.04
Vygrebnaya Sloboda	6.33 ± 0.02	4.3	1.1 ± 0.1	0.60 ± 0.02	47.2 ± 0.6	19.0 ± 0.1	1.06 ± 0.08	0.23 ± 0.01	0.71 ± 0.01
Masany	5.50 ± 0.01	3.8	1.0 ± 0.4	1.59 ± 0.02	54.5 ± 0.4	16.9 ± 0.2	1.16 ± 0.07	0.35 ± 0.01	0.61

## Sheet: Radionuclide activities
Radionuclide activities in soil of sample plots
	137Cs	90Sr
	Bq/kg
Babchin	126 ± 4.5	9.9 ± 1.6
Vygrebnaya Sloboda	1074 ± 31	16.3 ± 2.7
Masany	11 510 ± 294	233.8 ± 35.4

## Sheet: Heavy metals
Heavy metals content on experimental plots
	Со	Cu	Cd	Cr	Mn	Ni	Pb	Sr	Zn	Mo	As
	mg/kg
Babchin	1.18 ± 0.47	1.54 ± 0.31	0.64 ± 0.32	7.26 ± 1.45	23.6 ± 7.08	2.96 ± 1.03	3.18 ± 0.79	26.8 ± 8.04	11.14 ± 2.23	6.66 ± 2.66	5.48 ± 2.74
Vygrebnaya Sloboda	0.22 ± 0.08	3.46 ± 0.69	0.46 ± 0.23	4.52 ± 0.9	41.7 ± 12.5	2.90 ± 1.01	1.74 ± 0.43	31.4 ± 9.42	24.8 ± 4.96	13.5 ± 5.4	1.56 ± 0.78
Masany	0.46 ± 0.18	2.54 ± 0.51	0.48 ± 0.24	6.52 ± 1.3	75.2 ± 22.5	3.22 ± 1.12	3.70 ± 0.92	24.4 ± 7.32	17.04 ± 3.41	2.96 ± 1.18	0.82 ± 0.41
