# Supplementary material for: Arabidopsis thaliana Accessions from the Chernobyl Exclusion Zone Show Decreased Sensitivity to Additional Acute Irradiation
Source: Plants (Basel). 2022 Nov 17;11(22):3142. doi: 10.3390/plants11223142 (PMC9697804; doi:10.3390/plants11223142)
Supplement: Supplementary file 1 [file plants-11-03142-s001.zip › Table S2.xlsx]

## Sheet: General
Table S2. Chlorophyll fluorescence parameters

## Sheet: Photosynthetic Parameters
Photosynthetic parameters for non-irradiated Arabidopsis thaliana seedlings, Bab-0															F	Actual fluorescence yield intensity at any time
															Fm'	Maximal chlorophyll fluorescence yield when photosystem II reaction centers are closed by a strong light pulse (relative units)
F	Fm'	Y (II)	ETR	Fo'	qP	qN	qL	NPQ	Y (NO)	Y (NPQ)	Fo	Fm	Fv/Fm		Y (II)	Effective photochemical quantum yield of photosystem II
1087	1252	0.132	23.3	375	0.188	0.379	0.065	0.419	0.612	0.256	363	1776	0.796		ETR	Electron transport rate (µmol electrons/(m^2 x s))
1093	1234	0.144	20.1	368	0.163	0.452	0.055	0.617	0.548	0.338	415	1995	0.792		Fo'	Minimum chlorophyll fluorescence yield in the state of open reaction centers
818	979	0.164	28.9	364	0.262	0.583	0.117	0.936	0.432	0.404	419	1895	0.779		qP	Coefficient of photochemical fluorescence quenching (puddle model)
1157	1337	0.135	23.8	451	0.203	0.453	0.079	0.528	0.566	0.299	423	2043	0.793		qN	Coefficient of non-photochemical fluorescence quenching
944	1098	0.14	24.7	374	0.213	0.438	0.084	0.622	0.53	0.33	493	1781	0.723		qL	Coefficient of photochemical fluorescence quenching (lake model)
1106	1295	0.146	25.8	467	0.228	0.515	0.096	0.659	0.515	0.339	441	2148	0.795		NPQ	Non-photochemical fluorescence quenching
432	496	0.129	22.8	223	0.234	0.732	0.121	1.593	0.336	0.535	268	1286	0.792		Y (NO)	Quantum yield of non-photochemical fluorescence quenching (due to down-regulation of the light-harvesting function)
1020	1202	0.151	26.6	432	0.236	0.505	0.1	0.71	0.496	0.353	501	2056	0.756		Y (NPQ)	Quantum yield of non-photochemical fluorescence quenching (non-induced by down-regulation of the light-harvesting function)
1070	1264	0.153	27	419	0.23	0.432	0.09	0.487	0.569	0.278	393	1880	0.791		Fo	Basic fluorescence yield
942	1139	0.173	30.5	379	0.259	0.477	0.104	0.606	0.515	0.312	376	1829	0.794		Fm	Maximal chlorophyll fluorescence yield
															Fv/Fm	Maximum photochemical quantum yield of photosystem II
Photosynthetic parameters for acutely irradiated (150 Gy) Arabidopsis thaliana seedlings, Bab-0
															Mann-Whitney U-test for two chronically irradiated accessions (VS-0 and Masa-0) in comparison with the reference accession Bab-0
F	Fm'	Y (II)	ETR	Fo'	qP	qN	qL	NPQ	Y (NO)	Y (NPQ)	Fo	Fm	Fv/Fm
1106	1292	0.144	25.4	442	0.219	0.484	0.088	0.623	0.527	0.329	449	2097	0.786					F	Fm'	Y (II)	ETR	Fo'	qP	qN	qL	NPQ	Y (NO)	Y (NPQ)	Fo	Fm	Fv/Fm
1118	1277	0.125	22.1	465	0.196	0.476	0.082	0.546	0.566	0.309	423	1974	0.786		p-value (Vygrebnaya Sloboda)			0.0281865	0.0281865	0.245279	0.245279	0.299678	0.0518227	0.0932909	0.0281865	0.155581	0.0932909	0.366157	0.897279	0.155581	0.0488855
1230	1411	0.128	22.6	486	0.196	0.478	0.077	0.584	0.55	0.322	462	2235	0.793		p-value (Masany)			0.366157	0.366157	0.698536	0.366157	0.436661	0.364151	0.245279	0.366157	0.897279	1	0.897279	0.245279	0.366157	0.0488855
1220	1422	0.142	25	447	0.207	0.407	0.076	0.467	0.585	0.273	443	2086	0.788
1212	1395	0.131	23.1	493	0.203	0.464	0.083	0.568	0.554	0.315	506	2188	0.769			p-value ≤ 0.005
1003	1190	0.157	27.7	441	0.25	0.527	0.11	0.695	0.497	0.346	432	2017	0.786
															Mann-Whitney U-test for acutely irradiated Bab-0 accession in comparison with the non-irradiated Bab-0 accession
Photosynthetic parameters for chronically irradiated (Chernobyl irradiation) Arabidopsis thaliana seedlings, VS-0
																		F	Fm'	Y (II)	ETR	Fo'	qP	qN	qL	NPQ	Y (NO)	Y (NPQ)	Fo	Fm	Fv/Fm
F	Fm'	Y (II)	ETR	Fo'	qP	qN	qL	NPQ	Y (NO)	Y (NPQ)	Fo	Fm	Fv/Fm		p-value			0.022741	0.034425	0.19306	0.415938	0.014669	0.385547	0.95675	0.415938	0.480796	0.385547	0.480796	0.0651973	0.02618	0.328973
848	994	0.147	25.9	411	0.25	0.612	0.121	0.963	0.435	0.418	450	1951	0.769
1124	1277	0.12	21.2	431	0.181	0.45	0.069	0.617	0.544	0.336	527	2065	0.745			p-value ≤ 0.005
1082	1268	0.147	25.9	423	0.22	0.47	0.086	0.584	0.539	0.314	414	2009	0.794
															Mann-Whitney U-test for acutely irradiated VS-0 accession in comparison with the chronically irradiated VS-0 accession
Photosynthetic parameters for acutely irradiated (150 Gy) Arabidopsis thaliana seedlings, VS-0
																		F	Fm'	Y (II)	ETR	Fo'	qP	qN	qL	NPQ	Y (NO)	Y (NPQ)	Fo	Fm	Fv/Fm
F	Fm'	Y (II)	ETR	Fo'	qP	qN	qL	NPQ	Y (NO)	Y (NPQ)	Fo	Fm	Fv/Fm		p-value			0.662521	0.662521	0.382734	0.382734	0.662521	0.190431	0.382734	0.382734	1	0.382734	1	1	1	1
885	1057	0.163	28.8	385	0.256	0.479	0.111	0.57	0.533	0.304	369	1660	0.778
887	1018	0.129	22.8	448	0.23	0.64	0.116	1.042	0.427	0.444	494	2079	0.762			p-value ≤ 0.005
915	1090	0.161	28.4	442	0.27	0.573	0.13	0.823	0.46	0.379	470	1987	0.763
															Mann-Whitney U-test for acutely irradiated Masa-0 accession in comparison with the chronically irradiated Masa-0 accession
Photosynthetic parameters for chronically irradiated (Chernobyl irradiation) Arabidopsis thaliana seedlings, Masa-0
																		F	Fm'	Y (II)	ETR	Fo'	qP	qN	qL	NPQ	Y (NO)	Y (NPQ)	Fo	Fm	Fv/Fm
F	Fm'	Y (II)	ETR	Fo'	qP	qN	qL	NPQ	Y (NO)	Y (NPQ)	Fo	Fm	Fv/Fm		p-value			0.382734	0.382734	0.827259	0.275234	0.190431	0.190431	1	0.382734	0.662521	0.662521	1	0.382734	1	0.382734
850	1034	0.178	31.4	338	0.264	0.465	0.105	0.624	0.506	0.316	378	1679	0.775
997	1174	0.151	26.6	444	0.242	0.541	0.108	0.758	0.483	0.366	472	2064	0.771			p-value ≤ 0.005
1175	1346	0.127	22.4	411	0.183	0.421	0.064	0.525	0.573	0.3	437	2052	0.787
Photosynthetic parameters for acutely irradiated (150 Gy) Arabidopsis thaliana seedlings, Masa-0
F	Fm'	Y (II)	ETR	Fo'	qP	qN	qL	NPQ	Y (NO)	Y (NPQ)	Fo	Fm	Fv/Fm
1077	1268	0.151	26.6	463	0.237	0.47	0.102	0.562	0.544	0.305	460	1980	0.768
1208	1369	0.188	20.8	447	0.175	0.449	0.065	0.563	0.564	0.318	467	2140	0.782
1081	1206	0.104	18.3	413	0.158	0.463	0.06	0.619	0.554	0.342	476	1952	0.756
