# Supplementary material for: Arabidopsis thaliana Accessions from the Chernobyl Exclusion Zone Show Decreased Sensitivity to Additional Acute Irradiation
Source: Plants (Basel). 2022 Nov 17;11(22):3142. doi: 10.3390/plants11223142 (PMC9697804; doi:10.3390/plants11223142)
Supplement: Supplementary file 1 [file plants-11-03142-s001.zip › Table S3.xlsx]

## Sheet: General
Table S3. Differential gene expression for chronically irradiated A. thaliana seedlings

## Sheet: Vygrebnaya Sloboda (VS-0)
Gene	Symbol	log2FC	p-value	FDR	Description
AT3G42723	AT3G42723	14.109	0.000881952	0.025858	aminoacyl-tRNA ligases;ATP binding;nucleotide binding
AT4G36140	AT4G36140	13.9207	1.92806e-07	9.23023e-05	disease resistance protein (TIR-NBS-LRR class), putative
AT3G44070	AT3G44070	13.0202	5.70913e-06	0.00106465	Glycosyl hydrolase family 35 protein
AT2G29300	AT2G29300	12.9574	8.59627e-05	0.00594235	NAD(P)-binding Rossmann-fold superfamily protein
AT5G66052	AT5G66052	12.8721	2.88735e-05	0.00311824
AT1G14250	APY5	12.6086	4.28422e-10	1.24924e-06	GDA1/CD39 nucleoside phosphatase family protein
AT1G63860	AT1G63860	12.5103	0.000549212	0.0192651	Disease resistance protein (TIR-NBS-LRR class) family
AT5G42460	AT5G42460	12.4065	0.000338332	0.0146847	F-box and associated interaction domains-containing protein
AT4G04402	AT4G04402	12.3361	2.69834e-07	0.000121901	two-component phosphorelay mediator, putative
AT4G01335	AT4G01335	12.1551	0.00098853	0.0276676
AT3G29100	VTI13	12.1077	0.000125478	0.0075369	vesicle transport V-snare 13
AT4G36515	AT4G36515	12.0276	0.00103569	0.028393
AT3G44740	AT3G44740	11.5549	0.000186961	0.00979866	Class II aaRS and biotin synthetases superfamily protein
AT5G47280	ADR1-L3	11.4948	6.52991e-08	4.50658e-05	ADR1-like 3
AT2G04378	AT2G04378	11.3921	0.00153836	0.0359118	Beta-galactosidase related protein
AT3G52680	AT3G52680	11.2274	3.46019e-08	2.88538e-05	F-box/RNI-like/FBD-like domains-containing protein
AT2G46455	AT2G46455	11.0017	1.10219e-07	5.79552e-05	OxaA/YidC-like membrane insertion protein
AT4G05040	AT4G05040	10.7854	2.10438e-06	0.000539984	ankyrin repeat family protein
AT1G51430	AT1G51430	10.7252	3.76618e-05	0.00359525
AT3G26135	AT3G26135	10.6449	2.05365e-05	0.00252379
AT5G03285	AT5G03285	10.5619	0.00094881	0.027054	other RNA
AT4G13575	AT4G13575	10.36	2.93181e-05	0.00313459
AT5G25920	AT5G25920	10.3566	0.000465584	0.0176729
AT3G46658	AT3G46658	10.2983	1.29027e-06	0.000383198	other RNA
AT5G45040	PETJ	10.254	0.000505939	0.0184738	Cytochrome c
AT3G53650	AT3G53650	10.2355	0.000349131	0.0149912	Histone superfamily protein
AT5G43403	AT5G43403	10.1747	0.00189375	0.0410492	other RNA
AT5G37560	AT5G37560	10.1118	2.83079e-05	0.00311824	RING/U-box superfamily protein
AT1G67365	AT1G67365	9.99849	0.000733149	0.0229683	other RNA
AT4G15975	AT4G15975	9.94478	4.26202e-06	0.000881964	RING/U-box superfamily protein
AT2G32795	AT2G32795	9.90433	0.000345934	0.0148938	other RNA
AT3G28300	AT14A	9.76241	1.61662e-05	0.00211624	Protein of unknown function (DUF677)
AT3G48290	CYP71A24	9.48007	0.000420703	0.0167212	cytochrome P450, family 71, subfamily A, polypeptide 24
AT2G29000	AT2G29000	9.38947	0.000166625	0.00901823	Leucine-rich repeat protein kinase family protein
AT3G05955	AT3G05955	9.31644	0.00201755	0.0427473
AT5G04625	AT5G04625	9.2085	0.000495772	0.0182921
AT3G24070	AT3G24070	9.12308	3.85562e-05	0.00365884	Zinc knuckle (CCHC-type) family protein
AT1G75945	AT1G75945	8.93722	1.40938e-08	1.6145e-05
AT3G18530	AT3G18530	8.9214	5.17361e-06	0.00099966	ARM repeat superfamily protein
AT2G04380	AT2G04380	8.83237	0.00195922	0.0419226
AT1G23960	AT1G23960	8.81354	7.60197e-07	0.000251374	Protein of unknown function (DUF626)
AT4G14390	AT4G14390	8.55428	7.85183e-05	0.0055644	Ankyrin repeat family protein
AT5G35760	AT5G35760	8.53306	8.24998e-05	0.00579033	Beta-galactosidase related protein
AT3G02235	AT3G02235	8.52358	1.87806e-06	0.000501989
AT1G35255	AT1G35255	8.45992	0.000940355	0.027054
AT5G65080	MAF5	8.44069	0.000431126	0.0168639	K-box region and MADS-box transcription factor family protein
AT1G19090	RKF2	8.12314	0.0023866	0.0475763	receptor-like serine/threonine kinase 2
AT2G35070	AT2G35070	8.07961	2.61508e-05	0.00295348
AT1G30160	AT1G30160	8.04883	0.00238102	0.0474945	Protein of unknown function (DUF295)
AT2G31141	AT2G31141	7.89862	0.00111281	0.0293289
AT5G56370	AT5G56370	7.80743	1.27747e-05	0.00182923	F-box/RNI-like/FBD-like domains-containing protein
AT5G28237	AT5G28237	7.66161	0.000234436	0.0113536	Pyridoxal-5'-phosphate-dependent enzyme family protein
AT5G54620	AT5G54620	7.66013	7.6358e-06	0.00130972	Ankyrin repeat family protein
AT1G34460	CYCB1	7.59813	0.00240319	0.0477882	CYCLIN B1;5
AT1G07330	AT1G07330	7.56305	0.00182204	0.0399338
AT4G09432	AT4G09432	7.56141	8.5355e-05	0.00591633
AT3G43990	AT3G43990	7.49641	0.00167121	0.038115	Bromo-adjacent homology (BAH) domain-containing protein
AT1G63870	AT1G63870	7.46743	0.000623397	0.0207637	Disease resistance protein (TIR-NBS-LRR class) family
AT3G45940	XYL2	7.43081	0.000785584	0.0239749	Glycosyl hydrolases family 31 protein
AT2G31150	AT2G31150	7.29882	0.000384364	0.0158668	ATP binding;ATPases, coupled to transmembrane movement of ions, phosphorylative mechanism
AT4G34881	AT4G34881	7.21423	8.78284e-11	5.63419e-07
AT1G25211	AT1G25211	7.10822	1.54264e-05	0.00207925	F-box family protein
AT3G22090	AT3G22090	6.98473	0.00242878	0.0480884
AT2G45135	AT2G45135	6.98278	4.11858e-07	0.000165129	RING/U-box superfamily protein
AT5G16980	AT5G16980	6.93031	0.000846182	0.0251541	Zinc-binding dehydrogenase family protein
AT3G47965	AT3G47965	6.86867	0.000596964	0.0203482
AT3G62460	AT3G62460	6.83221	6.77882e-10	1.75823e-06	Putative endonuclease or glycosyl hydrolase
AT1G24881	AT1G24881	6.7706	2.15784e-08	2.07718e-05	F-box family protein
AT1G25055	AT1G25055	6.75323	5.13913e-09	8.19028e-06	F-box family protein
AT1G25150	AT1G25150	6.61106	2.10764e-05	0.00257043	F-box family protein
AT2G04800	AT2G04800	6.48183	0.000389331	0.0159857
AT1G27540	AT1G27540	6.29269	0.00023664	0.0113803	Protein of unknown function (DUF295)
AT5G03355	AT5G03355	6.21761	1.90317e-05	0.00237527
AT5G66150	AT5G66150	6.09959	2.92699e-06	0.000695432	Glycosyl hydrolase family 38 protein
AT2G32880	AT2G32880	5.97614	4.09352e-10	1.24924e-06	TRAF-like family protein
AT4G04110	AT4G04110	5.92482	0.000456612	0.017498	Toll-Interleukin-Resistance (TIR) domain family protein
AT1G65150	AT1G65150	5.70063	8.64338e-08	5.33147e-05	TRAF-like family protein
AT3G46700	UGT76E3	5.6572	3.21123e-08	2.78379e-05	UDP-Glycosyltransferase superfamily protein
AT3G60150	AT3G60150	5.60868	7.8314e-06	0.00132906	Protein of unknown function (DUF498/DUF598)
AT5G28450	AT5G28450	5.50703	1.4081e-06	0.000406889	Chlorophyll A-B binding family protein
AT3G28320	AT3G28320	5.41089	0.000122174	0.00740473	Protein of unknown function (DUF677)
AT2G33790	AGP30	5.33892	0.00215215	0.0446219	arabinogalactan protein 30
AT1G34418	AT1G34418	5.22094	0.000303519	0.0134839	other RNA
AT1G50520	CYP705A27	5.21504	0.000374883	0.015616	cytochrome P450, family 705, subfamily A, polypeptide 27
AT3G28290	AT14A	5.20328	0.000753385	0.0232802	Protein of unknown function (DUF677)
AT4G38932	AT4G38932	5.20104	0.000391117	0.0159857
AT1G06103	AT1G06103	5.17214	8.54018e-05	0.00591633
AT4G19630	AT4G19630	5.1462	0.00018675	0.00979866	winged-helix DNA-binding transcription factor family protein
AT1G23950	AT1G23950	5.02201	8.21176e-09	1.05357e-05	Protein of unknown function (DUF626)
AT1G73490	AT1G73490	5.01658	0.00101284	0.0279578	RNA-binding (RRM/RBD/RNP motifs) family protein
AT5G55360	AT3	4.87538	0.0025442	0.0496316	MBOAT (membrane bound O-acyl transferase) family protein
AT3G28880	AT3G28880	4.86361	0.00176864	0.0392132	Ankyrin repeat family protein
AT5G38350	AT5G38350	4.84195	0.000956929	0.0271397	Disease resistance protein (NBS-LRR class) family
AT5G28350	AT5G28350	4.76311	8.55637e-07	0.000274445	Quinoprotein amine dehydrogenase, beta chain-like; RIC1-like guanyl-nucleotide exchange factor
AT4G37700	AT4G37700	4.75514	0.00113624	0.0298485
AT5G37750	AT5G37750	4.74723	0.000387165	0.0159413	Chaperone DnaJ-domain superfamily protein
AT1G23935	AT1G23935	4.60885	7.48541e-11	5.63419e-07
AT2G41470	AT2G41470	4.59316	0.000235812	0.0113739
AT3G26395	AT3G26395	4.45292	9.53233e-05	0.00643683
AT2G47770	TSPO	4.31661	0.000729934	0.0229311	TSPO(outer membrane tryptophan-rich sensory protein)-related
AT2G05510	AT2G05510	4.24393	0.000122354	0.00740473	Glycine-rich protein family
AT2G44995	AT2G44995	4.04784	0.0025036	0.0491226
AT3G50480	HR4	3.99007	2.22931e-06	0.00055004	homolog of RPW8 4
AT3G09162	AT3G09162	3.96928	0.000185413	0.00974936
AT4G02540	AT4G02540	3.96313	1.63646e-06	0.000456429	Cysteine/Histidine-rich C1 domain family protein
AT1G09257	AT1G09257	3.91638	9.83976e-06	0.0015713
AT3G43850	AT3G43850	3.83072	0.000473823	0.017817
AT5G10140	FLC	3.82973	8.22567e-11	5.63419e-07	K-box region and MADS-box transcription factor family protein
AT4G27570	UGT79B3	3.66766	5.3272e-05	0.00449657	UDP-Glycosyltransferase superfamily protein
AT4G29760	HTT4	3.66565	8.12975e-07	0.000263396
AT5G35940	JAL41	3.63393	0.000100283	0.00656188	Mannose-binding lectin superfamily protein
AT5G49500	SRP-54B	3.54256	1.80412e-06	0.0004904	Signal recognition particle, SRP54 subunit protein
AT4G19820	AT4G19820	3.44228	0.000130648	0.00780363	Glycosyl hydrolase family protein with chitinase insertion domain
AT4G13560	UNE15	3.43577	0.000148853	0.00852582	Late embryogenesis abundant protein (LEA) family protein
AT1G59930	AT1G59930	3.4263	0.000511653	0.0185648	MADS-box family protein
AT1G66860	AT1G66860	3.40947	1.15574e-07	5.97908e-05	Class I glutamine amidotransferase-like superfamily protein
AT4G07835	AT4G07835	3.37605	1.36668e-06	0.000398513
AT1G74890	ARR15	3.25448	3.65561e-05	0.00357012	response regulator 15
AT1G23985	AT1G23985	3.25112	4.84784e-05	0.00419123
AT4G16215	AT4G16215	3.15326	6.68446e-05	0.00510486
AT2G15050	LTP7	3.14634	3.51114e-09	5.92735e-06	lipid transfer protein
AT3G48520	CYP94B3	3.0517	5.25608e-05	0.00444825	cytochrome P450, family 94, subfamily B, polypeptide 3
AT4G12900	AT4G12900	2.98023	5.60384e-05	0.00463256	Gamma interferon responsive lysosomal thiol (GILT) reductase family protein
AT2G04090	DTX5	2.97953	0.000166008	0.00900964	MATE efflux family protein
AT5G38590	AT5G38590	2.96659	3.51334e-07	0.000146351	F-box/RNI-like/FBD-like domains-containing protein
AT1G23980	ATL47	2.95675	2.6863e-09	4.78684e-06	RING/U-box superfamily protein
AT1G52040	MBP1	2.94904	0.00201909	0.0427473	myrosinase-binding protein 1
AT4G13170	RPL13AC	2.89643	1.83614e-09	3.6809e-06	Ribosomal protein L13 family protein
AT5G66630	DAR5	2.87714	0.000744183	0.0231269	DA1-related protein 5
AT1G59950	AT1G59950	2.86761	0.000300177	0.0133971	NAD(P)-linked oxidoreductase superfamily protein
AT3G48640	AT3G48640	2.83845	0.00237908	0.0474853
AT1G52690	LEA7	2.82299	5.06403e-05	0.00430845	Late embryogenesis abundant protein (LEA) family protein
AT4G27852	AT4G27852	2.72855	0.00108811	0.0289761
AT4G14140	MET2	2.71711	2.16056e-05	0.00260005	DNA methyltransferase 2
AT3G51075	AT3G51075	2.71516	6.21608e-06	0.00112012	other RNA
AT5G52300	LTI65	2.69938	0.000224004	0.0110029	CAP160 protein
AT2G46950	CYP709B2	2.65259	0.000114083	0.00711909	cytochrome P450, family 709, subfamily B, polypeptide 2
AT5G48570	FKBP65	2.62719	0.000831222	0.0249405	FKBP-type peptidyl-prolyl cis-trans isomerase family protein
AT4G02850	AT4G02850	2.62386	0.000159356	0.00883499	phenazine biosynthesis PhzC/PhzF family protein
AT1G52030	F-ATMBP	2.62309	0.00014126	0.00823802	myrosinase-binding protein 2
AT3G09450	AT3G09450	2.59494	0.000667789	0.0216122
AT1G62500	AT1G62500	2.57275	5.75529e-05	0.00467344	Bifunctional inhibitor/lipid-transfer protein/seed storage 2S albumin superfamily protein
AT3G54366	AT3G54366	2.54774	1.03722e-07	5.54481e-05
AT2G15080	AtRLP19	2.51868	7.58152e-08	4.76818e-05	receptor like protein 19
AT1G04183	AT1G04183	2.49925	4.37764e-05	0.00392618
AT3G44120	AT3G44120	2.48467	0.000384959	0.0158709	F-box and associated interaction domains-containing protein
AT2G17850	AT2G17850	2.47419	0.000261071	0.0122068	Rhodanese/Cell cycle control phosphatase superfamily protein
AT3G18320	AT3G18320	2.45355	0.000738804	0.0230932	F-box and associated interaction domains-containing protein
AT1G06100	AT1G06100	2.4229	0.00208865	0.0437866	Fatty acid desaturase family protein
AT3G19515	AT3G19515	2.36677	7.30131e-06	0.00128675
AT5G46900	AT5G46900	2.36135	0.00173143	0.0388089	Bifunctional inhibitor/lipid-transfer protein/seed storage 2S albumin superfamily protein
AT5G48090	ELP1	2.35143	7.35524e-07	0.000245749	EDM2-like protein1
AT1G52400	BGLU18	2.3078	0.00036209	0.0153828	beta glucosidase 18
AT3G49160	PKP4	2.29884	0.000179311	0.00952221	pyruvate kinase family protein
AT5G59220	SAG113	2.29667	0.000217816	0.0107982	highly ABA-induced PP2C gene 1
AT3G49510	AT3G49510	2.28748	2.86056e-05	0.00311824	F-box family protein
AT2G29290	AT2G29290	2.28101	2.20184e-08	2.07718e-05	NAD(P)-binding Rossmann-fold superfamily protein
AT5G62920	ARR6	2.27144	6.6348e-07	0.000228829	response regulator 6
AT3G45960	EXLA3	2.26431	0.00237214	0.047465	expansin-like A3
AT3G27884	AT3G27884	2.25186	0.00217974	0.0449905	other RNA
AT5G27890	AT5G27890	2.25132	7.73098e-07	0.000253032
AT1G78030	AT1G78030	2.24743	0.000209806	0.0105644
AT1G19050	ARR7	2.22764	3.59829e-08	2.88538e-05	response regulator 7
AT5G01060	AT5G01060	2.22552	6.04641e-05	0.00481237	Protein kinase protein with tetratricopeptide repeat domain
AT3G60160	ABCC9	2.21785	4.17383e-07	0.000165279	multidrug resistance-associated protein 9
AT1G64940	CYP89A6	2.21312	1.46242e-05	0.00202185	cytochrome P450, family 87, subfamily A, polypeptide 6
AT1G49170	AT1G49170	2.1972	7.58039e-06	0.00130721	Protein of unknown function (DUF167)
AT5G51480	SKS2	2.19719	0.0010586	0.0286779	SKU5 similar 2
AT1G70880	AT1G70880	2.19196	0.000900187	0.0262964	Polyketide cyclase/dehydrase and lipid transport superfamily protein
AT3G21510	AHP1	2.16419	0.000105836	0.00677913	histidine-containing phosphotransmitter 1
AT5G43660	AT5G43660	2.12947	0.00193417	0.041553	2-oxoglutarate (2OG) and Fe(II)-dependent oxygenase superfamily protein
AT4G19460	AT4G19460	2.12485	3.30053e-06	0.000745525	UDP-Glycosyltransferase superfamily protein
AT4G15340	PEN1	2.11672	0.00015609	0.00875523	pentacyclic triterpene synthase 1
AT4G31870	GPX7	2.11222	2.3166e-06	0.000567212	glutathione peroxidase 7
AT5G47510	AT5G47510	2.11217	0.000602972	0.0204227	Sec14p-like phosphatidylinositol transfer family protein
AT3G52526	AT3G52526	2.09493	1.48021e-05	0.00203767
AT5G02650	AT5G02650	2.07755	0.00129456	0.0320888
AT5G51720	NEET	2.07645	0.000305168	0.0135235	2 iron, 2 sulfur cluster binding
AT5G16190	ATCSLA11	2.06631	0.000121548	0.00738383	cellulose synthase like A11
AT1G67350	AT1G67350	2.06619	5.53084e-09	8.19028e-06
AT1G52410	TSA1	2.0647	0.000137594	0.00809783	TSK-associating protein 1
AT3G50840	AT3G50840	2.06139	0.000372471	0.0155357	Phototropic-responsive NPH3 family protein
AT1G15830	AT1G15830	2.05856	0.00140505	0.0337075
AT2G19900	NADP-ME1	2.02725	2.98817e-05	0.0031708	NADP-malic enzyme 1
AT3G25790	HHO1	2.02181	0.00196996	0.0420682	myb-like transcription factor family protein
AT4G19570	AT4G19570	2.01784	0.00168132	0.038193	Chaperone DnaJ-domain superfamily protein
AT5G39610	NAC92	-2.00835	1.02447e-05	0.00161872	NAC domain containing protein 6
AT1G09080	MED37B	-2.0122	6.32437e-05	0.00493562	Heat shock protein 70 (Hsp 70) family protein
AT1G65486	AT1G65486	-2.01333	5.86819e-06	0.00108799
AT1G30220	INT2	-2.01541	0.000191943	0.00992994	inositol transporter 2
AT3G58270	AT3G58270	-2.01959	0.00147778	0.0349525	Arabidopsis phospholipase-like protein (PEARLI 4) with TRAF-like domain
AT3G57640	AT3G57640	-2.03701	6.14539e-06	0.00112012	Protein kinase superfamily protein
AT3G05140	RBK2	-2.05036	0.000285714	0.0130174	ROP binding protein kinases 2
AT3G44660	HDA10	-2.0522	6.18242e-06	0.00112012	histone deacetylase 10
AT5G01550	LECRKA4.2	-2.05531	2.80947e-05	0.00310737	lectin receptor kinase a4.1
AT4G00960	AT4G00960	-2.05739	2.75015e-07	0.000122515	Protein kinase superfamily protein
AT3G13437	AT3G13437	-2.06705	0.000408885	0.0164348
AT4G13810	RLP47	-2.07526	3.95117e-05	0.00371653	receptor like protein 47
AT1G71110	AT1G71110	-2.08609	1.5017e-05	0.00205841
AT5G59690	AT5G59690	-2.08766	2.85428e-06	0.000683218	Histone superfamily protein
AT5G53450	PAP14	-2.09885	0.000941342	0.027054	OBP3-responsive gene 1
AT5G46710	AT5G46710	-2.10183	6.62718e-07	0.000228829	PLATZ transcription factor family protein
AT2G21185	AT2G21185	-2.10199	1.0878e-05	0.00166385
AT1G65250	AT1G65250	-2.10869	3.10473e-06	0.000721624	Protein kinase superfamily protein
AT1G35230	AGP5	-2.11632	0.000305254	0.0135235	arabinogalactan protein 5
AT1G61610	AT1G61610	-2.12152	0.000568475	0.0197336	S-locus lectin protein kinase family protein
AT3G26170	CYP71B19	-2.12299	7.01292e-08	4.67242e-05	cytochrome P450, family 71, subfamily B, polypeptide 19
AT5G49850	JAL46	-2.12481	0.000357874	0.0152644	Mannose-binding lectin superfamily protein
AT1G19610	PDF1.4	-2.13522	2.19206e-05	0.00262352	Arabidopsis defensin-like protein
AT2G17740	AT2G17740	-2.14161	0.00059693	0.0203482	Cysteine/Histidine-rich C1 domain family protein
AT3G10150	ATPAP16	-2.14823	0.00104909	0.0285631	purple acid phosphatase 16
AT2G36800	UGT73C5	-2.15724	0.000154748	0.00873185	don-glucosyltransferase 1
AT2G35075	AT2G35075	-2.15911	0.00189805	0.0410518
AT1G72940	AT1G72940	-2.1684	5.61765e-09	8.19028e-06	Toll-Interleukin-Resistance (TIR) domain-containing protein
AT3G57470	AT3G57470	-2.17162	0.000725586	0.0228392	Insulinase (Peptidase family M16) family protein
AT5G38310	AT5G38310	-2.1873	0.000649941	0.0213814
AT1G73805	SARD1	-2.20091	0.00185513	0.0404441	Calmodulin binding protein-like
AT3G56400	WRKY70	-2.21923	0.000400479	0.0162714	WRKY DNA-binding protein 70
AT3G26922	AT3G26922	-2.22463	0.00162672	0.0375105	F-box/RNI-like superfamily protein
AT3G23250	MYB15	-2.23171	5.55164e-05	0.00461318	myb domain protein 15
AT1G27730	ZAT10	-2.23173	0.00069221	0.0221583	salt tolerance zinc finger
AT5G52760	HIPP14	-2.23411	0.000894717	0.0261844	Copper transport protein family
AT1G26420	FOX5	-2.24369	0.000369898	0.0155091	FAD-binding Berberine family protein
AT1G65481	AT1G65481	-2.2443	0.000212339	0.0106309
AT5G01540	LECRK62	-2.25273	0.000287225	0.0130492	lectin receptor kinase a4.1
AT5G42830	AT5G42830	-2.25367	5.37604e-05	0.00451667	HXXXD-type acyl-transferase family protein
AT5G25260	FLOT2	-2.28304	3.0955e-06	0.000721624	SPFH/Band 7/PHB domain-containing membrane-associated protein family
AT1G64563	AT1G64563	-2.28962	0.000311279	0.0137714	other RNA
AT4G23610	AT4G23610	-2.29671	9.05646e-06	0.00149735	Late embryogenesis abundant (LEA) hydroxyproline-rich glycoprotein family
AT3G47580	AT3G47580	-2.30148	8.3051e-05	0.00581629	Leucine-rich repeat protein kinase family protein
AT5G38565	AT5G38565	-2.3121	0.000415292	0.0165678	F-box/FBD-like domains containing protein
AT5G44567	AT5G44567	-2.31337	1.51558e-05	0.00205984
AT3G02840	AT3G02840	-2.31392	0.00140295	0.0337003	ARM repeat superfamily protein
AT3G53150	UGT73D1	-2.31864	0.000944227	0.027054	UDP-glucosyl transferase 73D1
AT4G25020	AT4G25020	-2.34213	6.73865e-05	0.00512185	D111/G-patch domain-containing protein
AT4G20000	AT4G20000	-2.34304	7.79802e-05	0.0055644	VQ motif-containing protein
AT1G07160	AT1G07160	-2.35063	0.0024947	0.0490004	Protein phosphatase 2C family protein
AT5G11210	GLR2.5	-2.3541	0.00010934	0.0069037	glutamate receptor 2.5
AT3G29000	CML45	-2.35631	0.000130539	0.00780363	Calcium-binding EF-hand family protein
AT5G27420	ATL31	-2.37349	5.59932e-07	0.000204089	carbon/nitrogen insensitive 1
AT5G41750	AT5G41750	-2.38477	1.75442e-08	1.85557e-05	Disease resistance protein (TIR-NBS-LRR class) family
AT1G51920	AT1G51920	-2.3876	0.00148079	0.0349752
AT1G17960	AT1G17960	-2.388	0.0023676	0.047465	Threonyl-tRNA synthetase
AT4G22390	AT4G22390	-2.38807	5.38404e-06	0.00101203	F-box associated ubiquitination effector family protein
AT1G80310	MOT2	-2.39276	7.53447e-09	1.00695e-05	sulfate transmembrane transporters
AT3G17400	AT3G17400	-2.39658	0.000289069	0.0130959	F-box family protein
AT5G22550	AT5G22550	-2.41773	0.00142163	0.0339783	Plant protein of unknown function (DUF247)
AT4G21920	AT4G21920	-2.41782	0.000975599	0.0274735
AT5G39670	CML46	-2.41877	1.5654e-05	0.00208341	Calcium-binding EF-hand family protein
AT3G13440	AT3G13440	-2.42017	5.21954e-07	0.000195511	S-adenosyl-L-methionine-dependent methyltransferases superfamily protein
AT3G11010	AtRLP34	-2.42757	0.000204101	0.0103421	receptor like protein 34
AT5G42380	CML37	-2.42867	0.000183411	0.00965996	calmodulin like 37
AT4G16680	AT4G16680	-2.4287	0.000579165	0.0198894	P-loop containing nucleoside triphosphate hydrolases superfamily protein
AT1G30730	AT1G30730	-2.43019	1.18199e-05	0.00174712	FAD-binding Berberine family protein
AT3G47480	CML47	-2.44948	0.000212055	0.0106309	Calcium-binding EF-hand family protein
AT4G15260	AT4G15260	-2.46621	0.000100448	0.00656188	UDP-Glycosyltransferase superfamily protein
AT2G17040	anac036	-2.47258	3.00522e-05	0.0031708	NAC domain containing protein 36
AT1G35210	AT1G35210	-2.47861	4.06428e-05	0.00378951
AT4G16892	AT4G16892	-2.47964	4.78156e-07	0.000184781	other RNA
AT5G10380	ATL55	-2.48372	5.73908e-08	4.09069e-05	RING/U-box superfamily protein
AT5G01015	AT5G01015	-2.50764	7.14553e-05	0.00531195
AT5G05135	AT5G05135	-2.50841	0.00213594	0.0444294
AT1G69750	COX19-2	-2.50988	1.60238e-07	7.78732e-05	cytochrome c oxidase 19-2
AT5G66830	AT5G66830	-2.52373	9.05635e-05	0.00615429	F-box family protein with a domain of unknown function (DUF295)
AT4G31398	AT4G31398	-2.53235	0.000558362	0.019488	other RNA
AT2G29370	AT2G29370	-2.56726	0.00246887	0.048612	NAD(P)-binding Rossmann-fold superfamily protein
AT4G11170	AT4G11170	-2.57375	0.000575041	0.0198493	Disease resistance protein (TIR-NBS-LRR class) family
AT4G11890	AT4G11890	-2.58215	0.000132939	0.00789633	Protein kinase superfamily protein
AT3G48630	AT3G48630	-2.59888	7.78619e-05	0.0055644
AT5G57567	AT5G57567	-2.6212	0.000123481	0.00744485
AT2G04215	AT2G04215	-2.6298	0.000372276	0.0155357
AT3G21660	AT3G21660	-2.65166	0.00157506	0.0364765	UBX domain-containing protein
AT1G72060	AT1G72060	-2.6579	3.74418e-05	0.00358491	serine-type endopeptidase inhibitors
AT4G03460	AT4G03460	-2.68192	0.000329028	0.0144175	Ankyrin repeat family protein
AT4G23160	CRK8	-2.7083	7.8438e-05	0.0055644	cysteine-rich RLK (RECEPTOR-like protein kinase) 8
AT1G26200	AT1G26200	-2.709	1.61156e-05	0.00211624	TRAM, LAG1 and CLN8 (TLC) lipid-sensing domain containing protein
AT3G21080	AT3G21080	-2.71389	0.000537076	0.0190561	ABC transporter-related
AT3G14700	AT3G14700	-2.71715	0.000632287	0.0209944	SART-1 family
AT3G25020	AtRLP42	-2.72799	0.00017548	0.0093342	receptor like protein 42
AT2G32680	AtRLP23	-2.73295	8.15365e-05	0.00576054	receptor like protein 23
AT5G52720	AT5G52720	-2.74457	0.00019987	0.0102353	Copper transport protein family
AT2G32020	AT2G32020	-2.75437	0.000848511	0.0251903	Acyl-CoA N-acyltransferases (NAT) superfamily protein
AT4G08555	AT4G08555	-2.75553	0.000254515	0.0119876
AT1G35710	AT1G35710	-2.75656	0.00110903	0.0293238	Protein kinase family protein with leucine-rich repeat domain
AT2G22880	AT2G22880	-2.77389	0.000424178	0.0167969	VQ motif-containing protein
AT3G62470	AT3G62470	-2.77892	2.49462e-07	0.000115964	Pentatricopeptide repeat (PPR) superfamily protein
AT4G37370	CYP81D8	-2.78701	0.000602918	0.0204227	cytochrome P450, family 81, subfamily D, polypeptide 8
AT5G63020	AT5G63020	-2.80859	1.2998e-09	2.97793e-06	Disease resistance protein (CC-NBS-LRR class) family
AT5G40010	AATP1	-2.81046	3.23558e-06	0.000741294	AAA-ATPase 1
AT3G03470	CYP89A9	-2.81546	3.66194e-05	0.00357012	cytochrome P450, family 87, subfamily A, polypeptide 9
AT5G24110	WRKY30	-2.81922	0.000540229	0.0191116	WRKY DNA-binding protein 30
AT1G65200	AT1G65200	-2.81931	5.24206e-07	0.000195511	Ubiquitin carboxyl-terminal hydrolase-related protein
AT5G24200	AT5G24200	-2.82805	5.53837e-07	0.000204089	alpha/beta-Hydrolases superfamily protein
AT5G52740	HIPP12	-2.83484	3.08911e-05	0.00322746	Copper transport protein family
AT5G49780	AT5G49780	-2.8466	6.4545e-05	0.00500068	Leucine-rich repeat protein kinase family protein
AT3G46770	REM22	-2.8541	0.000112322	0.00703659	AP2/B3-like transcriptional factor family protein
AT1G01680	PUB54	-2.85459	0.000363932	0.0154202	plant U-box 54
AT2G29910	AT2G29910	-2.85673	2.12929e-07	0.000100437	F-box/RNI-like superfamily protein
AT3G44300	NIT2	-2.86096	0.00136506	0.0330946	nitrilase 2
AT4G25310	AT4G25310	-2.86364	0.000505643	0.0184738	2-oxoglutarate (2OG) and Fe(II)-dependent oxygenase superfamily protein
AT3G48300	CYP71A23	-2.86926	0.000541023	0.0191116	cytochrome P450, family 71, subfamily A, polypeptide 23
AT4G35180	LHT7	-2.87874	0.000482442	0.0180143	LYS/HIS transporter 7
AT5G13170	SWEET15	-2.91063	0.000282079	0.0129068	senescence-associated gene 29
AT4G23150	CRK7	-2.9194	4.92849e-05	0.00423811	cysteine-rich RLK (RECEPTOR-like protein kinase) 7
AT1G09930	OPT2	-2.92363	0.000777039	0.0238503	oligopeptide transporter 2
AT1G43640	TULP5	-2.92472	1.39899e-05	0.00196445	tubby like protein 5
AT4G26890	MAPKKK16	-2.95362	0.00070898	0.0225154	mitogen-activated protein kinase kinase kinase 16
AT4G14450	AT4G14450	-2.95719	0.000437773	0.0170614
AT4G31875	AT4G31875	-2.9631	0.000506914	0.0184764
AT4G04510	CRK38	-2.96835	3.62662e-05	0.0035573	cysteine-rich RLK (RECEPTOR-like protein kinase) 38
AT5G38250	LRK10L-2.3	-3.00254	2.14413e-05	0.00259597	Protein kinase family protein
AT4G23310	CRK23	-3.01538	5.62152e-05	0.00463433	cysteine-rich RLK (RECEPTOR-like protein kinase) 23
AT5G53230	AT5G53230	-3.02303	0.00114259	0.0299252	Protein of unknown function (DUF295)
AT3G45590	SEN1	-3.02498	7.47616e-06	0.0012962	splicing endonuclease 1
AT1G79790	AT1G79790	-3.04725	0.00109219	0.0289761	Haloacid dehalogenase-like hydrolase (HAD) superfamily protein
AT3G60961	AT3G60961	-3.05636	1.26581e-05	0.00182067	P-loop containing nucleoside triphosphate hydrolases superfamily protein
AT2G03420	AT2G03420	-3.07742	1.40608e-07	7.0469e-05
AT4G28460	PIP1	-3.08283	0.00084056	0.025105
AT2G44380	AT2G44380	-3.09245	2.4382e-06	0.000592463	Cysteine/Histidine-rich C1 domain family protein
AT4G11070	WRKY41	-3.09843	0.000740392	0.0230932	WRKY family transcription factor
AT1G72920	AT1G72920	-3.1069	3.94333e-07	0.000160104	Toll-Interleukin-Resistance (TIR) domain family protein
AT5G38100	AT5G38100	-3.10812	4.53196e-05	0.00402666	S-adenosyl-L-methionine-dependent methyltransferases superfamily protein
AT5G10760	AED1	-3.11156	2.02486e-05	0.0025035	Eukaryotic aspartyl protease family protein
AT4G33120	AT4G33120	-3.11718	3.74018e-05	0.00358491	S-adenosyl-L-methionine-dependent methyltransferases superfamily protein
AT3G61390	PUB36	-3.1246	0.000669086	0.0216122	RING/U-box superfamily protein
AT4G23810	WRKY53	-3.14447	1.55961e-06	0.00043881	WRKY family transcription factor
AT5G59670	AT5G59670	-3.14659	0.00066815	0.0216122	Leucine-rich repeat protein kinase family protein
AT5G39030	AT5G39030	-3.16992	6.90716e-05	0.00519797	Protein kinase superfamily protein
AT2G36790	UGT73C6	-3.18463	0.00164685	0.0378115	UDP-glucosyl transferase 73C6
AT3G01830	CML40	-3.1983	9.6545e-08	5.45006e-05	Calcium-binding EF-hand family protein
AT3G45860	CRK4	-3.21271	5.96248e-05	0.00476663	cysteine-rich RLK (RECEPTOR-like protein kinase) 4
AT1G13520	AT1G13520	-3.26381	0.000467869	0.0177129	Protein of unknown function (DUF1262)
AT4G14630	GLP9	-3.27139	0.0010814	0.028929	germin-like protein 9
AT2G45660	SOC1	-3.38913	3.56204e-10	1.24924e-06	AGAMOUS-like 20
AT2G44370	AT2G44370	-3.42115	4.18282e-05	0.00386639	Cysteine/Histidine-rich C1 domain family protein
AT1G72910	AT1G72910	-3.46486	0.000487936	0.0181492	Toll-Interleukin-Resistance (TIR) domain-containing protein
AT5G61890	ERF114	-3.50517	0.00150903	0.0354683	Integrase-type DNA-binding superfamily protein
AT3G60966	AT3G60966	-3.53069	5.14073e-06	0.00099966	RING/U-box superfamily protein
AT3G18250	AT3G18250	-3.5365	8.20835e-05	0.00578409	Putative membrane lipoprotein
AT2G29100	ATGLR2.9	-3.58764	0.00237058	0.047465	glutamate receptor 2.9
AT5G59680	AT5G59680	-3.60024	4.24286e-06	0.000881964	Leucine-rich repeat protein kinase family protein
AT1G05880	ARI12	-3.61912	5.04007e-05	0.00429948	RING/U-box superfamily protein
AT1G18000	AT1G18000	-3.62889	2.95746e-10	1.18576e-06	Major facilitator superfamily protein
AT1G21245	AT1G21245	-3.65747	0.000255454	0.0120075	Protein kinase superfamily protein
AT3G28510	AT3G28510	-3.67884	3.27289e-05	0.00332209	P-loop containing nucleoside triphosphate hydrolases superfamily protein
AT1G18010	AT1G18010	-3.67899	1.43507e-10	7.67166e-07	Major facilitator superfamily protein
AT3G61400	AT3G61400	-3.68381	0.00102584	0.0282194	2-oxoglutarate (2OG) and Fe(II)-dependent oxygenase superfamily protein
AT5G05340	PER52	-3.68457	0.000505626	0.0184738	Peroxidase superfamily protein
AT4G23140	CRK6	-3.7208	7.44412e-05	0.00540204	cysteine-rich RLK (RECEPTOR-like protein kinase) 6
AT3G15536	AT3G15536	-3.73318	2.89943e-05	0.00312078
AT4G33550	AT4G33550	-3.79043	0.000531996	0.0189521	Bifunctional inhibitor/lipid-transfer protein/seed storage 2S albumin superfamily protein
AT2G14610	PR1	-3.80002	1.77192e-05	0.00225533	pathogenesis-related gene 1
AT3G57260	BGL2	-3.81084	1.91304e-06	0.000502957	beta-1,3-glucanase 2
AT1G69630	FBL13	-3.82207	0.000273683	0.0126672	F-box/RNI-like superfamily protein
AT5G39050	PMAT1	-3.83931	0.000444624	0.017141	HXXXD-type acyl-transferase family protein
AT5G51465	AT5G51465	-3.89671	9.69083e-06	0.00156198
AT2G42365	AT2G42365	-3.97457	1.89213e-05	0.0023707	other RNA
AT1G80555	AT1G80555	-3.9765	4.66829e-07	0.000182604	Isocitrate/isopropylmalate dehydrogenase family protein
AT1G58225	AT1G58225	-4.04344	3.68272e-05	0.00357949
AT2G42485	AT2G42485	-4.15031	6.94246e-07	0.000234399	other RNA
AT5G09570	AT5G09570	-4.16221	0.00212402	0.044239	Cox19-like CHCH family protein
AT1G12030	AT1G12030	-4.18906	0.000666942	0.0216122	Protein of unknown function (DUF506)
AT4G22870	AT4G22870	-4.19242	0.0016771	0.0381781	2-oxoglutarate (2OG) and Fe(II)-dependent oxygenase superfamily protein
AT3G26240	AT3G26240	-4.19909	2.25775e-05	0.00265918	Cysteine/Histidine-rich C1 domain family protein
AT2G43620	AT2G43620	-4.24015	0.000562061	0.0195525	Chitinase family protein
AT5G39090	AT5G39090	-4.25287	2.02934e-05	0.0025035	HXXXD-type acyl-transferase family protein
AT3G24982	ATRLP40	-4.25331	0.00163515	0.0376345	receptor like protein 40
AT2G25440	AtRLP20	-4.50202	0.00033593	0.01462	receptor like protein 20
AT4G21490	NDB3	-4.54542	0.00117529	0.0304012	NAD(P)H dehydrogenase B3
AT2G38823	AT2G38823	-4.56407	0.00138298	0.0334173
AT2G29120	GLR2.7	-4.61786	4.06956e-08	3.10788e-05	glutamate receptor 2.7
AT5G47850	CCR4	-4.71394	9.25244e-07	0.000288128	CRINKLY4 related 4
AT3G13130	AT3G13130	-4.78371	0.000103116	0.00666823
AT2G20800	NDB4	-4.97028	0.00175919	0.0391747	NAD(P)H dehydrogenase B4
AT1G21240	WAK3	-5.05232	7.31641e-09	1.00695e-05	wall associated kinase 3
AT2G29110	ATGLR2.8	-5.12759	0.000189122	0.00983156	glutamate receptor 2.8
AT4G15270	AT4G15270	-5.21618	1.14936e-05	0.00170675	glucosyltransferase-related
AT2G05914	AT2G05914	-5.32142	2.40367e-08	2.20279e-05
AT1G44740	AT1G44740	-5.35197	0.00017471	0.00931974
AT5G24640	AT5G24640	-5.44951	0.00206364	0.0434612
AT3G25010	AtRLP41	-5.58095	4.29747e-06	0.000883598	receptor like protein 41
AT5G52930	AT5G52930	-5.75014	0.000673679	0.0216836	Protein of unknown function (DUF295)
AT1G17990	AT1G17990	-5.76047	0.000864366	0.0254821	FMN-linked oxidoreductases superfamily protein
AT1G72870	AT1G72870	-5.76904	4.32004e-05	0.00392326	Disease resistance protein (TIR-NBS class)
AT5G49420	AT5G49420	-5.98743	0.00191389	0.0412555	MADS-box transcription factor family protein
AT5G24215	AT5G24215	-6.11159	1.59568e-05	0.00211494
AT3G09775	AT3G09775	-6.13358	0.000946711	0.027054
AT3G09620	AT3G09620	-6.19869	0.000188533	0.00981689	P-loop containing nucleoside triphosphate hydrolases superfamily protein
AT2G42170	AT2G42170	-6.20476	2.1477e-09	4.0522e-06	Actin family protein
AT5G59920	ULI3	-6.27624	3.04808e-07	0.000132118	Cysteine/Histidine-rich C1 domain family protein
AT2G11215	AT2G11215	-6.72103	4.23364e-05	0.00389095
AT5G64790	AT5G64790	-6.7812	0.00198629	0.0423043	O-Glycosyl hydrolases family 17 protein
AT5G09876	AT5G09876	-6.81736	0.00179361	0.0396336
AT3G49130	AT3G49130	-7.08136	0.00150941	0.0354683	SWAP (Suppressor-of-White-APricot)/surp RNA-binding domain-containing protein
AT5G34871	AT5G34871	-7.13919	6.18249e-07	0.000217916	other RNA
AT1G72855	AT1G72855	-7.17695	3.04102e-08	2.70946e-05	other RNA
AT5G03495	AT5G03495	-7.25024	9.9342e-08	5.45006e-05	RNA-binding (RRM/RBD/RNP motifs) family protein
AT5G41780	AT5G41780	-7.49803	0.00122652	0.030957	myosin heavy chain-related
AT3G63320	AT3G63320	-7.64971	0.000929671	0.0269306	Protein phosphatase 2C family protein
AT3G43950	AT3G43950	-7.82933	0.00120924	0.0308069	Protein kinase superfamily protein
AT5G67040	AT5G67040	-7.91865	0.00126575	0.0316191	Protein of unknown function (DUF295)
AT1G44030	AT1G44030	-7.93143	0.00138358	0.0334173	Cysteine/Histidine-rich C1 domain family protein
AT1G77960	AT1G77960	-8.01633	9.5627e-05	0.00644115
AT2G18460	LCV3	-8.10926	1.38043e-05	0.00195054	like COV 3
AT2G05915	AT2G05915	-8.2463	0.000312907	0.0138054
AT1G58936	AT1G58936	-8.40751	0.000547981	0.0192514	Inositol-pentakisphosphate 2-kinase family protein
AT2G16340	AT2G16340	-8.43926	0.00130381	0.0322353
AT4G05235	AT4G05235	-8.45243	3.13373e-05	0.00324804
AT1G64260	AT1G64260	-8.4601	0.000165467	0.0090033	MuDR family transposase
AT1G08293	AT1G08293	-8.46124	0.00234931	0.0472143
AT4G04500	CRK37	-8.49474	0.000148082	0.00851208	cysteine-rich RLK (RECEPTOR-like protein kinase) 37
AT1G47370	AT1G47370	-8.54506	0.00152108	0.0356122	Toll-Interleukin-Resistance (TIR) domain family protein
AT1G72850	AT1G72850	-8.56494	0.00016966	0.00910464	Disease resistance protein (TIR-NBS class)
AT5G54040	AT5G54040	-8.66619	0.000526822	0.0188381	Cysteine/Histidine-rich C1 domain family protein
AT5G38980	AT5G38980	-8.69426	5.5199e-11	5.63419e-07
AT1G02580	MEA	-8.73391	0.000524318	0.0188252	SET domain-containing protein
AT3G61035	AT3G61035	-8.75096	0.00065732	0.0214877	Cytochrome P450 superfamily protein
AT3G25013	AT3G25013	-8.78242	0.000189447	0.00983254	Synaptobrevin family protein
AT4G11340	AT4G11340	-8.905	0.0025658	0.0498984	Disease resistance protein (TIR-NBS-LRR class) family
AT5G62240	AT5G62240	-8.93623	0.00239008	0.0476159	Cell cycle regulated microtubule associated protein
AT1G72860	AT1G72860	-9.00543	0.000333485	0.0145531	Disease resistance protein (TIR-NBS-LRR class) family
AT5G39770	AT5G39770	-9.0866	1.86489e-05	0.00234573	Restriction endonuclease, type II-like superfamily protein
AT5G40990	GLIP1	-9.08942	0.000285059	0.0130061	GDSL lipase 1
AT3G44430	AT3G44430	-9.1528	9.61456e-08	5.45006e-05
AT2G03130	AT2G03130	-9.18225	0.00170418	0.038467	Ribosomal protein L12/ ATP-dependent Clp protease adaptor protein ClpS family protein
AT5G59662	AT5G59662	-9.2402	3.16348e-05	0.00326266	other RNA
AT5G38820	AT5G38820	-9.32465	0.000601325	0.0204101	Transmembrane amino acid transporter family protein
AT2G44390	AT2G44390	-9.70179	0.00130449	0.0322353	Cysteine/Histidine-rich C1 domain family protein
AT3G54363	AT3G54363	-9.92332	5.17247e-07	0.000195511
AT1G72852	AT1G72852	-9.94592	9.97777e-08	5.45006e-05
AT3G46370	AT3G46370	-10.0158	4.34327e-05	0.00392424	Leucine-rich repeat protein kinase family protein
AT2G14100	CYP705A13	-10.0322	7.11913e-06	0.00126158	cytochrome P450, family 705, subfamily A, polypeptide 13
AT2G10615	AT2G10615	-10.1267	0.000107281	0.00682745
AT5G35450	RPP8L3	-10.442	3.21645e-07	0.000137557	Disease resistance protein (CC-NBS-LRR class) family
AT1G25083	AT1G25083	-10.5895	2.15967e-06	0.000541393	Glutamine amidotransferase type 1 family protein
AT5G59660	AT5G59660	-10.7033	4.96735e-08	3.7053e-05	Leucine-rich repeat protein kinase family protein
AT1G72840	AT1G72840	-10.9203	1.04094e-08	1.27479e-05	Disease resistance protein (TIR-NBS-LRR class)
AT5G18000	VDD	-10.9382	1.16153e-06	0.000351471	VERDANDI
AT5G28000	AT5G28000	-10.9582	0.000571821	0.0197855	Polyketide cyclase/dehydrase and lipid transport superfamily protein
AT5G55790	AT5G55790	-11.0892	1.47582e-07	7.28261e-05
AT5G59650	AT5G59650	-11.1314	7.13927e-08	4.67242e-05	Leucine-rich repeat protein kinase family protein
AT2G14285	AT2G14285	-11.3746	6.60356e-08	4.50658e-05	Small nuclear ribonucleoprotein family protein
AT3G60950	AT3G60950	-11.4752	1.52635e-09	3.26385e-06	C2 calcium/lipid-binding endonuclease/exonuclease/phosphatase
AT1G35320	AT1G35320	-11.6558	3.71667e-08	2.90762e-05
AT5G38260	LRK10L-2.1	-11.8073	0.000142791	0.0083122	Protein kinase superfamily protein
AT2G14460	AT2G14460	-12.045	1.07309e-08	1.27479e-05
AT1G60525	AT1G60525	-12.32	7.12612e-10	1.75823e-06	other RNA
AT1G23915	AT1G23915	-13.4314	3.98234e-05	0.00373284
AT5G17880	CSA1	-13.6005	2.26982e-10	1.04006e-06	disease resistance protein (TIR-NBS-LRR class)
AT2G41440	AT2G41440	-13.6669	5.38316e-06	0.00101203
AT5G17890	DAR4	-14.5429	8.64914e-12	2.77421e-07	DA1-related protein 4
AT3G61030	AT3G61030	-15.0587	1.97847e-08	1.98311e-05	Calcium-dependent lipid-binding (CaLB domain) family protein

## Sheet: Masany (Masa-0)
Gene	Symbol	log2FC	p-value	FDR	Description
AT1G14250	APY5	15.0435	3.31741e-11	3.54686e-07	GDA1/CD39 nucleoside phosphatase family protein
AT5G35480	AT5G35480	12.9558	4.15766e-07	0.000404112
AT2G29300	AT2G29300	12.8478	9.22528e-05	0.0122682	NAD(P)-binding Rossmann-fold superfamily protein
AT4G19500	RPP2A	12.8421	8.82623e-05	0.0121088	nucleoside-triphosphatases;transmembrane receptors;nucleotide binding;ATP binding
AT2G27402	AT2G27402	12.5554	3.15837e-06	0.00138773
AT1G63860	AT1G63860	12.5281	0.000544231	0.0366184	Disease resistance protein (TIR-NBS-LRR class) family
AT4G36140	AT4G36140	12.1927	8.43032e-07	0.000616089	disease resistance protein (TIR-NBS-LRR class), putative
AT5G42460	AT5G42460	12.1077	0.000409836	0.0309306	F-box and associated interaction domains-containing protein
AT5G35490	ATMRU1	12.0656	4.91034e-07	0.000437498	mto 1 responding up 1
AT5G46510	AT5G46510	11.8653	6.38748e-07	0.000525329	Disease resistance protein (TIR-NBS-LRR class) family
AT5G66052	AT5G66052	11.7808	6.50577e-05	0.00987635
AT1G27570	AT1G27570	11.7343	2.31928e-05	0.00502641	phosphatidylinositol 3- and 4-kinase family protein
AT3G53650	AT3G53650	11.6759	0.00010573	0.0131539	Histone superfamily protein
AT3G29100	VTI13	11.4839	0.000198462	0.020081	vesicle transport V-snare 13
AT3G43340	AT3G43340	11.4033	1.73606e-06	0.000976917	Pseudouridine synthase family protein
AT3G16750	AT3G16750	11.395	1.12489e-06	0.000755193
AT5G56370	AT5G56370	11.3159	1.71753e-07	0.000204036	F-box/RNI-like/FBD-like domains-containing protein
AT4G04402	AT4G04402	10.884	1.13014e-06	0.000755193	two-component phosphorelay mediator, putative
AT1G51430	AT1G51430	10.7376	3.7344e-05	0.00669166
AT5G56380	AT5G56380	10.6	4.84944e-05	0.00827371	F-box/RNI-like/FBD-like domains-containing protein
AT5G47280	ADR1-L3	10.3903	2.2755e-07	0.000251678	ADR1-like 3
AT2G19610	AT2G19610	10.2529	0.000497995	0.034574	RING/U-box superfamily protein
AT4G12100	AT4G12100	10.2409	1.88427e-05	0.00437957	Cullin family protein
AT1G20400	AT1G20400	10.0612	0.000112053	0.0137179	Protein of unknown function (DUF1204)
AT5G45040	PETJ	10.0405	0.000569103	0.037402	Cytochrome c
AT1G76960	AT1G76960	10.006	0.000512835	0.0353489
AT1G67365	AT1G67365	9.92875	0.000784635	0.0452551	other RNA
AT3G46658	AT3G46658	9.92036	2.08267e-06	0.00108259	other RNA
AT1G27540	AT1G27540	9.89899	1.52785e-05	0.00379889	Protein of unknown function (DUF295)
AT1G09995	AT1G09995	9.87148	4.92883e-05	0.00836466	DNA repair DEAD helicase RAD3/XP-D subfamily protein
AT1G06963	AT1G06963	9.82335	3.78695e-05	0.00674813
AT4G09432	AT4G09432	9.78169	5.38409e-06	0.0020317
AT2G01422	AT2G01422	9.66115	5.9212e-05	0.00940781
AT3G47250	AT3G47250	9.60765	4.03825e-13	1.29527e-08	Plant protein of unknown function (DUF247)
AT4G15975	AT4G15975	9.57498	6.56522e-06	0.00236606	RING/U-box superfamily protein
AT1G40087	AT1G40087	9.55828	0.000479907	0.0339053	Plant transposase (Ptta/En/Spm family)
AT3G52680	AT3G52680	9.47711	3.29995e-07	0.000341438	F-box/RNI-like/FBD-like domains-containing protein
AT2G32795	AT2G32795	9.45738	0.000537301	0.0363585	other RNA
AT2G46455	AT2G46455	9.3106	7.62393e-07	0.000596433	OxaA/YidC-like membrane insertion protein
AT4G14390	AT4G14390	9.18194	3.69354e-05	0.00665564	Ankyrin repeat family protein
AT1G50290	AT1G50290	8.9457	0.000713541	0.0428592
AT4G05040	AT4G05040	8.92315	1.74132e-05	0.00423128	ankyrin repeat family protein
AT4G34881	AT4G34881	8.85661	1.08713e-11	1.74349e-07
AT2G29000	AT2G29000	8.74229	0.000299798	0.0260597	Leucine-rich repeat protein kinase family protein
AT2G31141	AT2G31141	8.62887	0.000529384	0.0361012
AT3G28300	AT14A	8.62402	6.19487e-05	0.00959906	Protein of unknown function (DUF677)
AT1G03106	AT1G03106	8.36076	6.51391e-05	0.00987635
AT1G06103	AT1G06103	8.35641	3.12366e-06	0.00138773
AT1G75945	AT1G75945	8.22239	3.42738e-08	6.10741e-05
AT3G45940	XYL2	8.19089	0.000334158	0.0277672	Glycosyl hydrolases family 31 protein
AT5G28237	AT5G28237	8.10449	0.000135418	0.0154215	Pyridoxal-5'-phosphate-dependent enzyme family protein
AT1G63870	AT1G63870	8.0838	0.000329374	0.027584	Disease resistance protein (TIR-NBS-LRR class) family
AT1G23960	AT1G23960	8.0779	1.26932e-06	0.000782948	Protein of unknown function (DUF626)
AT3G24070	AT3G24070	8.07651	8.87163e-05	0.0121088	Zinc knuckle (CCHC-type) family protein
AT1G25211	AT1G25211	7.96822	4.4045e-06	0.00180102	F-box family protein
AT3G18530	AT3G18530	7.83509	1.09909e-05	0.00339814	ARM repeat superfamily protein
AT1G65483	AT1G65483	7.72598	2.24213e-05	0.00492578
AT3G02235	AT3G02235	7.71973	5.31991e-06	0.00203138
AT2G05642	AT2G05642	7.65562	6.01069e-06	0.00219083	Nucleic acid-binding, OB-fold-like protein
AT3G47290	ATPLC8	7.47495	2.39426e-05	0.00508528	phosphatidylinositol-speciwc phospholipase C8
AT5G16980	AT5G16980	7.14055	0.000714972	0.0428649	Zinc-binding dehydrogenase family protein
AT1G24881	AT1G24881	7.06376	1.34526e-08	2.87661e-05	F-box family protein
AT5G17090	AT5G17090	7.0495	0.000851837	0.047687	Cystatin/monellin superfamily protein
AT4G13575	AT4G13575	7.02421	0.000495711	0.0344901
AT1G25055	AT1G25055	7.00904	3.43188e-09	1.09525e-05	F-box family protein
AT1G25150	AT1G25150	6.98208	1.19974e-05	0.00353044	F-box family protein
AT5G35760	AT5G35760	6.89083	0.000446308	0.0322418	Beta-galactosidase related protein
AT4G16215	AT4G16215	6.81319	4.81501e-08	8.1285e-05
AT4G29200	AT4G29200	6.72526	4.82395e-07	0.000437498	Beta-galactosidase related protein
AT3G47350	ATHSD2	6.42672	2.77872e-05	0.00557047	hydroxysteroid dehydrogenase 2
AT2G35070	AT2G35070	6.302	0.000936881	0.0496702
AT2G31150	AT2G31150	6.19783	0.000917165	0.0492765	ATP binding;ATPases, coupled to transmembrane movement of ions, phosphorylative mechanism
AT2G45135	AT2G45135	6.04984	1.55467e-06	0.000890467	RING/U-box superfamily protein
AT5G05055	AT5G05055	5.9805	0.00012572	0.0147314
AT3G03702	AT3G03702	5.75205	0.000579397	0.0375438	other RNA
AT5G55360	AT3	5.7094	0.000870342	0.047966	MBOAT (membrane bound O-acyl transferase) family protein
AT5G03355	AT5G03355	5.55897	5.23368e-05	0.00856718
AT1G73490	AT1G73490	5.28176	0.000785772	0.0452551	RNA-binding (RRM/RBD/RNP motifs) family protein
AT5G66150	AT5G66150	5.24676	1.1118e-05	0.00339814	Glycosyl hydrolase family 38 protein
AT1G23950	AT1G23950	5.08296	7.47644e-09	1.99839e-05	Protein of unknown function (DUF626)
AT3G46700	UGT76E3	4.98246	1.03004e-07	0.000150176	UDP-Glycosyltransferase superfamily protein
AT4G04223	AT4G04223	4.89761	5.00037e-06	0.00193237	other RNA
AT5G25980	TGG2	4.88707	0.000878946	0.0481918	glucoside glucohydrolase 2
AT5G46490	AT5G46490	4.85836	2.1443e-07	0.000245637	Disease resistance protein (TIR-NBS-LRR class) family
AT2G32880	AT2G32880	4.85653	2.83077e-09	1.00886e-05	TRAF-like family protein
AT5G37750	AT5G37750	4.75694	0.000385764	0.0300179	Chaperone DnaJ-domain superfamily protein
AT3G62460	AT3G62460	4.68061	1.29414e-08	2.87661e-05	Putative endonuclease or glycosyl hydrolase
AT1G50520	CYP705A27	4.64567	0.000777265	0.0450828	cytochrome P450, family 705, subfamily A, polypeptide 27
AT3G48640	AT3G48640	4.50551	0.000200402	0.0201227
AT3G26395	AT3G26395	4.43758	9.85701e-05	0.0127485
AT3G60150	AT3G60150	4.4195	6.43145e-05	0.00987028	Protein of unknown function (DUF498/DUF598)
AT3G09162	AT3G09162	4.30613	9.7191e-05	0.0127241
AT1G23935	AT1G23935	4.25525	1.65464e-10	1.32681e-06
AT2G41470	AT2G41470	4.16113	0.000453344	0.0324771
AT4G09920	AT4G09920	4.0932	0.00052009	0.035569	FBD, F-box and Leucine Rich Repeat domains containing protein
AT3G09160	AT3G09160	3.93124	3.07583e-05	0.00590762	RNA-binding (RRM/RBD/RNP motifs) family protein
AT1G11740	AT1G11740	3.786	2.04714e-06	0.00108259	ankyrin repeat family protein
AT4G29760	HTT4	3.75247	6.57494e-07	0.000527228
AT3G06125	AT3G06125	3.72742	9.77851e-05	0.0127485	other RNA
AT1G10340	AT1G10340	3.7046	0.000416071	0.0310555	Ankyrin repeat family protein
AT1G65150	AT1G65150	3.53156	8.19516e-06	0.00276695	TRAF-like family protein
AT3G21080	AT3G21080	3.51511	1.46245e-05	0.00376136	ABC transporter-related
AT4G07835	AT4G07835	3.46318	1.10523e-06	0.000755193
AT2G15050	LTP7	3.42336	1.52029e-09	7.17415e-06	lipid transfer protein
AT3G18485	ILR2	3.38067	0.00043556	0.0319358	iaa-leucine resistant 2
AT1G66860	AT1G66860	3.31754	1.51305e-07	0.000188562	Class I glutamine amidotransferase-like superfamily protein
AT1G33960	AIG1	3.30092	2.53894e-05	0.00527924	P-loop containing nucleoside triphosphate hydrolases superfamily protein
AT5G38590	AT5G38590	3.25694	1.4305e-07	0.000188562	F-box/RNI-like/FBD-like domains-containing protein
AT2G21730	CAD2	3.23429	2.09262e-06	0.00108259	cinnamyl alcohol dehydrogenase homolog 2
AT5G36910	THI2.2	3.20178	0.000791523	0.0452551	thionin 2.2
AT2G25450	GSL-OH	3.1877	2.40986e-05	0.00508528	2-oxoglutarate (2OG) and Fe(II)-dependent oxygenase superfamily protein
AT1G02770	AT1G02770	3.1777	7.57619e-05	0.0108694	Protein of unknown function (DUF626)
AT2G06002	AT2G06002	3.1455	1.3751e-05	0.00374456	other RNA
AT1G35710	AT1G35710	3.13712	0.000367427	0.0291714	Protein kinase family protein with leucine-rich repeat domain
AT4G13560	UNE15	3.04976	0.000390011	0.0302164	Late embryogenesis abundant protein (LEA) family protein
AT4G04030	ATOFP9	3.04131	0.00089567	0.0486925	ovate family protein 9
AT2G15080	AtRLP19	3.02454	1.23206e-08	2.87661e-05	receptor like protein 19
AT4G13170	RPL13AC	3.01612	1.22958e-09	7.17415e-06	Ribosomal protein L13 family protein
AT4G27852	AT4G27852	2.97078	0.000584434	0.0375539
AT5G27010	AT5G27010	2.93555	0.000323735	0.0272541	ARM repeat superfamily protein
AT5G49500	SRP-54B	2.87043	1.28995e-05	0.00364902	Signal recognition particle, SRP54 subunit protein
AT1G54040	ESP	2.78578	1.10666e-05	0.00339814	epithiospecifier protein
AT5G10140	FLC	2.7548	2.09507e-09	8.39992e-06	K-box region and MADS-box transcription factor family protein
AT2G44240	AT2G44240	2.74384	0.000680575	0.0417389	Protein of Unknown Function (DUF239)
AT4G14140	MET2	2.72565	2.129e-05	0.00475879	DNA methyltransferase 2
AT1G58602	AT1G58602	2.69321	4.80414e-05	0.00824026	LRR and NB-ARC domains-containing disease resistance protein
AT5G05430	AT5G05430	2.67889	0.000531955	0.0361493	RNA-binding protein
AT2G21830	AT2G21830	2.65691	1.52421e-06	0.000890467	Cysteine/Histidine-rich C1 domain family protein
AT4G12900	AT4G12900	2.63628	0.000156171	0.0170961	Gamma interferon responsive lysosomal thiol (GILT) reductase family protein
AT5G28350	AT5G28350	2.63279	6.37722e-05	0.0098341	Quinoprotein amine dehydrogenase, beta chain-like; RIC1-like guanyl-nucleotide exchange factor
AT1G04425	AT1G04425	2.59155	2.87028e-06	0.00133427	other RNA
AT3G24900	AtRLP39	2.56348	8.66171e-05	0.0120793	receptor like protein 39
AT1G03410	2A6	2.516	6.92697e-05	0.0102632	2-oxoglutarate (2OG) and Fe(II)-dependent oxygenase superfamily protein
AT1G67910	AT1G67910	2.50835	0.000314826	0.0266439
AT3G19515	AT3G19515	2.50701	4.43588e-06	0.00180102
AT4G09080	TOC75-IV	2.49228	0.000135584	0.0154215	Outer membrane OMP85 family protein
AT2G34600	TIFY 5B	2.44635	1.4309e-05	0.00374456	jasmonate-zim-domain protein 7
AT3G18320	AT3G18320	2.40997	0.000855186	0.04769	F-box and associated interaction domains-containing protein
AT4G12490	AT4G12490	2.39265	0.000218195	0.0211438	Bifunctional inhibitor/lipid-transfer protein/seed storage 2S albumin superfamily protein
AT3G18880	AT3G18880	2.34136	7.25877e-05	0.010583	Nucleic acid-binding, OB-fold-like protein
AT2G29290	AT2G29290	2.3021	2.01142e-08	3.79507e-05	NAD(P)-binding Rossmann-fold superfamily protein
AT2G38430	AT2G38430	2.26064	0.000397576	0.0304349
AT1G23985	AT1G23985	2.24786	0.000923957	0.049326
AT3G52526	AT3G52526	2.23001	8.39075e-06	0.00280347
AT4G17250	AT4G17250	2.20696	6.0675e-07	0.000525329
AT5G58980	NCER3	2.20142	5.68439e-08	9.11634e-05	Neutral/alkaline non-lysosomal ceramidase
AT2G46950	CYP709B2	2.19271	0.000519203	0.035569	cytochrome P450, family 709, subfamily B, polypeptide 2
AT1G50040	AT1G50040	2.18381	0.000401388	0.0306536	Protein of unknown function (DUF1005)
AT3G44860	FAMT	2.18005	3.97846e-07	0.000398779	farnesoic acid carboxyl-O-methyltransferase
AT1G74890	ARR15	2.16016	0.000929267	0.049512	response regulator 15
AT1G67350	AT1G67350	2.14537	3.75613e-09	1.09525e-05
AT4G31870	GPX7	2.11864	2.26351e-06	0.00115241	glutathione peroxidase 7
AT1G49170	AT1G49170	2.08315	1.25615e-05	0.0035974	Protein of unknown function (DUF167)
AT5G44575	AT5G44575	2.08278	0.00081599	0.0464525
AT3G47360	HSD3	2.04607	0.000757176	0.0443183	hydroxysteroid dehydrogenase 3
AT1G07985	AT1G07985	2.018	0.00010815	0.0133935	Expressed protein
AT3G62500	AT3G62500	-2.04867	2.58429e-06	0.00125592
AT2G23170	GH3.3	-2.05112	0.00047498	0.0336313	Auxin-responsive GH3 family protein
AT5G38100	AT5G38100	-2.08511	0.000853385	0.047687	S-adenosyl-L-methionine-dependent methyltransferases superfamily protein
AT5G06740	AT5G06740	-2.09808	4.99991e-06	0.00193237	Concanavalin A-like lectin protein kinase family protein
AT2G26820	ATPP2-A3	-2.11716	0.000174626	0.0183643	phloem protein 2-A3
AT1G43640	TULP5	-2.1382	0.000169007	0.0178908	tubby like protein 5
AT4G13160	AT4G13160	-2.14055	7.52474e-06	0.00258944	Protein of unknown function, DUF593
AT3G46770	REM22	-2.15357	0.000847885	0.0476286	AP2/B3-like transcriptional factor family protein
AT1G65481	AT1G65481	-2.15514	0.0003013	0.0261195
AT3G61010	AT3G61010	-2.1573	1.56568e-09	7.17415e-06	Ferritin/ribonucleotide reductase-like family protein
AT1G48500	TIFY6A	-2.16184	0.000163027	0.0174312	jasmonate-zim-domain protein 4
AT3G48630	AT3G48630	-2.20407	0.000275296	0.0245964
AT1G66725	MIR163	-2.23272	0.00012443	0.0146731	MIR163; miRNA
AT4G31110	WAKL18	-2.25176	0.000598247	0.0379976	Wall-associated kinase family protein
AT5G01550	LECRKA4.2	-2.30431	1.13748e-05	0.00340977	lectin receptor kinase a4.1
AT4G12020	WRKY19	-2.32787	0.000712815	0.0428592	protein kinase family protein
AT2G13810	ALD1	-2.33502	0.000148132	0.0163839	AGD2-like defense response protein 1
AT5G55790	AT5G55790	-2.35566	0.000242712	0.0225
AT2G05914	AT2G05914	-2.43785	7.58868e-06	0.00258944
AT2G13960	AT2G13960	-2.44591	0.00035208	0.0287353	Homeodomain-like superfamily protein
AT5G49780	AT5G49780	-2.45599	0.000202082	0.0201227	Leucine-rich repeat protein kinase family protein
AT4G33120	AT4G33120	-2.46126	0.000226651	0.0216364	S-adenosyl-L-methionine-dependent methyltransferases superfamily protein
AT5G05653	AT5G05653	-2.48785	3.47469e-05	0.00637477
AT2G22905	AT2G22905	-2.50465	0.000366028	0.0291642	Expressed protein
AT1G26200	AT1G26200	-2.52063	2.99881e-05	0.00580502	TRAM, LAG1 and CLN8 (TLC) lipid-sensing domain containing protein
AT5G59090	SBT4.12	-2.54224	1.09031e-05	0.00339814	subtilase 4.12
AT5G26290	AT5G26290	-2.54578	6.08137e-05	0.00951681	TRAF-like family protein
AT3G52748	AT3G52748	-2.59515	0.000132088	0.0152401	other RNA
AT2G44370	AT2G44370	-2.60462	0.00021959	0.0211512	Cysteine/Histidine-rich C1 domain family protein
AT1G26250	AT1G26250	-2.61458	0.000127348	0.0148534	Proline-rich extensin-like family protein
AT2G14460	AT2G14460	-2.66279	1.95531e-05	0.00451198
AT3G60950	AT3G60950	-2.67154	4.76396e-06	0.00190036	C2 calcium/lipid-binding endonuclease/exonuclease/phosphatase
AT5G39180	AT5G39180	-2.75161	0.000420871	0.0311245	RmlC-like cupins superfamily protein
AT3G60961	AT3G60961	-2.7596	2.96791e-05	0.00580462	P-loop containing nucleoside triphosphate hydrolases superfamily protein
AT5G39000	AT5G39000	-2.77848	1.59955e-08	3.2066e-05	Malectin/receptor-like protein kinase family protein
AT3G45070	AT3G45070	-2.79371	0.000209367	0.0204739	P-loop containing nucleoside triphosphate hydrolases superfamily protein
AT3G09960	AT3G09960	-2.79929	2.6499e-05	0.00541374	Calcineurin-like metallo-phosphoesterase superfamily protein
AT5G40010	AATP1	-2.81653	3.32071e-06	0.00143935	AAA-ATPase 1
AT4G16880	AT4G16880	-2.82792	7.88825e-07	0.000602419	Leucine-rich repeat (LRR) family protein
AT4G11910	SGR2	-2.86861	0.0003703	0.0292948
AT3G61030	AT3G61030	-2.87758	1.41266e-05	0.00374456	Calcium-dependent lipid-binding (CaLB domain) family protein
AT1G09930	OPT2	-2.91008	0.000846701	0.0476286	oligopeptide transporter 2
AT2G14285	AT2G14285	-2.91346	2.68795e-05	0.0054224	Small nuclear ribonucleoprotein family protein
AT3G48300	CYP71A23	-3.02303	0.000415032	0.0310555	cytochrome P450, family 71, subfamily A, polypeptide 23
AT5G14650	AT5G14650	-3.06161	0.000340945	0.0281851	Pectin lyase-like superfamily protein
AT5G26260	AT5G26260	-3.08401	3.09083e-06	0.00138773	TRAF-like family protein
AT3G43580	AT3G43580	-3.15213	0.000621534	0.0389369	Beta-galactosidase related protein
AT3G47580	AT3G47580	-3.28825	6.73886e-06	0.00240166	Leucine-rich repeat protein kinase family protein
AT2G44380	AT2G44380	-3.42658	1.1648e-06	0.000762469	Cysteine/Histidine-rich C1 domain family protein
AT2G14100	CYP705A13	-3.43603	0.000487682	0.0343035	cytochrome P450, family 705, subfamily A, polypeptide 13
AT4G20210	TPS08	-3.50726	3.59146e-05	0.00654523	Terpenoid cyclases/Protein prenyltransferases superfamily protein
AT4G31875	AT4G31875	-3.5584	0.000163047	0.0174312
AT3G03670	PER28	-3.62823	0.000252167	0.0231093	Peroxidase superfamily protein
AT2G23110	AT2G23110	-4.05409	0.000310498	0.026417	Late embryogenesis abundant protein, group 6
AT5G53230	AT5G53230	-4.23322	0.000176988	0.0184915	Protein of unknown function (DUF295)
AT2G05995	AT2G05995	-4.27224	0.000722964	0.0429848	other RNA
AT2G11215	AT2G11215	-6.02674	7.36126e-05	0.0106357
AT2G18460	LCV3	-6.98956	2.39132e-05	0.00508528	like COV 3
AT5G14160	AT5G14160	-7.57661	0.000228878	0.0217737	F-box family protein
AT4G05235	AT4G05235	-8.45243	3.83544e-05	0.00679679
AT3G53840	WAKL15	-8.50522	0.000689557	0.0419506	Protein kinase superfamily protein
AT1G15640	AT1G15640	-8.58866	0.00017567	0.0184137
AT2G41440	AT2G41440	-8.84013	8.82063e-06	0.00291672
AT1G23915	AT1G23915	-8.8572	6.08245e-05	0.00951681
AT3G09775	AT3G09775	-9.33243	0.000366427	0.0291642
AT1G25083	AT1G25083	-10.5895	2.50415e-06	0.0012544	Glutamine amidotransferase type 1 family protein

## Sheet: Common response
The common response to chronic irradiation for two accessions from radioactively contaminated plots (VS-0 and Masa-0)
Gene	Symbol	Description
Response to salicylic acid stimulus
AT4G14390	AT4G14390	Ankyrin repeat family protein
AT4G05040	AT4G05040	Ankyrin repeat family protein
AT3G48640	AT3G48640	Transmembrane protein
Regulation of protein stability
AT2G32880	AT2G32880	TRAF-like family protein
AT1G65150	AT1G65150	TRAF-like family protein
Defense response
AT1G63860	AT1G63860	Disease resistance protein (TIR-NBS-LRR class) family
AT1G63870	AT1G63870	Disease resistance protein (TIR-NBS-LRR class) family
AT3G21080	AT3G21080	ABC transporter-related
AT4G36140	AT4G36140	Disease resistance protein (TIR-NBS-LRR class), putative
AT5G03355	AT5G03355	Cysteine/histidine-rich C1 domain protein
AT2G44370	AT2G44370	Cysteine/Histidine-rich C1 domain family protein
AT5G01550	LECRKA4.2	Lectin receptor kinase a4.1
AT5G49780	AT5G49780	Leucine-rich repeat protein kinase family protein
Oxidation-reduction processes
AT5G45040	CYTC6A	Cytochrome C6A
AT1G50520	CYP705A27	Cytochrome P450, family 705, subfamily A, polypeptide 27
AT2G46950	CYP709B2	Cytochrome P450, family 709, subfamily B, polypeptide 2
AT2G46455	AT2G46455	OxaA/YidC-like membrane insertion protein
AT2G14100	CYP705A13	Cytochrome P450, family 705, subfamily A, polypeptide 13
AT3G48300	CYP71A23	Cytochrome P450, family 71, subfamily A, polypeptide 23
Lipid metabolism
AT5G55360	AT3	MBOAT (membrane bound O-acyl transferase) family protein
AT1G26200	AT1G26200	TRAM, LAG1 and CLN8 (TLC) lipid-sensing domain containing protein
Response to oxidative stress
AT5G16980	AT5G16980	Zinc-binding dehydrogenase family protein
AT4G31870	GPX7	Glutathione peroxidase 7
Plant development
AT4G13560	UNE15	Late embryogenesis abundant protein (LEA) family protein
AT2G29000	AT2G29000	Leucine-rich repeat protein kinase family protein
AT5G10140	FLC	K-box region and MADS-box transcription factor family protein
AT5G03355	AT5G03355	Cysteine/histidine-rich C1 domain protein
AT1G09930	OPT2	Oligopeptide transporter 2
AT4G31875	AT4G31875	Hypothetical protein
AT2G11215	AT2G11215	Hypothetical protein
AT5G38100	AT5G38100	SABATH family methyltransferase.
AT4G33120	AT4G33120	S-adenosyl-L-methionine-dependent methyltransferases superfamily protein
Carbohydrate metabolism
AT5G66150	AT5G66150	Glycosyl hydrolase family 38 protein
AT3G45940	XYL2	Glycosyl hydrolases family 31 protein
AT5G35760	AT5G35760	Beta-galactosidase related protein
AT3G52526	AT3G52526	Phosphoglucan phosphatase
Protein and amino acid metabolism
AT1G66860	AT1G66860	Class I glutamine amidotransferase-like superfamily protein
AT5G28237	AT5G28237	Pyridoxal-5'-phosphate-dependent enzyme family protein
AT1G25083	AT1G25083	Glutamine amidotransferase type 1 family protein
Histone
AT3G53650	AT3G53650	Histone superfamily protein
Transport
AT3G29100	VTI13	Vesicle transport V-snare 13
AT5G28350	AT5G28350	Quinoprotein amine dehydrogenase, beta chain-like; RIC1-like guanyl-nucleotide exchange factor
AT2G15050	LTP7	Lipid transfer protein
Phytohormonal responses
AT3G46700	UGT76E3	UDP-Glycosyltransferase superfamily protein
AT1G74890	ARR15	Response regulator 15
AT2G44380	AT2G44380	Cysteine/Histidine-rich C1 domain family protein
AT3G47580	AT3G47580	Leucine-rich repeat protein kinase family protein
Signal transduction
AT2G15080	AtRLP19	Receptor like protein 19
AT5G42460	AT5G42460	F-box and associated interaction domains-containing protein
AT3G18320	AT3G18320	F-box and associated interaction domains-containing protein
AT1G25211	AT1G25211	F-box family protein
AT1G24881	AT1G24881	F-box family protein
AT1G25055	AT1G25055	F-box family protein
AT4G04402	AT4G04402	Two-component phosphorelay mediator, putative
AT1G25150	AT1G25150	F-box family protein
AT5G56370	AT5G56370	F-box/RNI-like/FBD-like domains-containing protein
AT3G52680	AT3G52680	F-box/RNI-like/FBD-like domains-containing protein
AT5G38590	AT5G38590	F-box/RNI-like/FBD-like domains-containing protein
AT1G35710	AT1G35710	Protein kinase family protein with leucine-rich repeat domain
AT1G27540	AT1G27540	F-box protein
Cytoskeleton
AT3G18530	AT3G18530	ARM repeat superfamily protein
Oxidoreductase activity
AT2G29300	AT2G29300	NAD(P)-binding Rossmann-fold superfamily protein
AT2G29290	AT2G29290	NAD(P)-binding Rossmann-fold superfamily protein
AT4G12900	AT4G12900	Gamma interferon responsive lysosomal thiol (GILT) reductase family protein
AT3G60150	AT3G60150	NADH dehydrogenase ubiquinone 1 alpha subcomplex assembly factor-like protein
Regulation of translation
AT4G13170	RPL13AC	Ribosomal protein L13 family protein
AT5G49500	SRP-54B	Signal recognition particle, SRP54 subunit protein
AT3G48630	AT3G48630	Protein of unknown function
Regulation of transcription
AT2G41470	AT2G41470	Agamous-like MADS-box protein
AT3G62460	AT3G62460	Putative endonuclease or glycosyl hydrolase
AT3G24070	AT3G24070	Zinc knuckle (CCHC-type) family protein
AT1G43640	TULP5	Tubby like protein 5
AT3G46770	REM22	AP2/B3-like transcriptional factor family protein
AT2G41440	AT2G41440	Agamous-like MADS-box protein
AT3G61030	AT3G61030	Calcium-dependent lipid-binding (CaLB domain) family protein
AT2G14285	AT2G14285	Small nuclear ribonucleoprotein family protein
DNA methylation
AT4G14140	MET2	DNA methyltransferase 2
Nucleotide metabolism
AT1G14250	APY5	GDA1/CD39 nucleoside phosphatase family protein
AT3G60961	AT3G60961	P-loop containing nucleoside triphosphate hydrolases superfamily protein
Regulation of programmed cell death
AT3G19515	AT3G19515	Apoptosis inhibitor
AT4G15975	AT4G15975	RING/U-box superfamily protein
AT1G73490	AT1G73490	RNA-binding (RRM/RBD/RNP motifs) family protein
AT1G23935	AT1G23935	Apoptosis inhibitory protein
AT2G45135	AT2G45135	RING/U-box superfamily protein
Abiotic stress response
AT4G29760	HTT4	Target of trans acting-siR480/255 protein
AT5G37750	AT5G37750	Chaperone DnaJ-domain superfamily protein
AT5G40010	AATP1	Nucleotide transporter 1
Photorespiration
AT1G67350	AT1G67350	NADH-ubiquinone oxidoreductase
Photosynthesis-related processes
AT4G13575	AT4G13575	Hypothetical protein
Сarboxylic acid metabolism
AT4G16215	AT4G16215	Hypothetical protein
Cell-cell adhesion
AT3G28300	AT14A	Protein of unknown function
Unknown Function
AT1G49170	AT1G49170	Protein of unknown function
AT1G23960	AT1G23960	Protein of unknown function
AT1G23950	AT1G23950	Protein of unknown function
AT1G23985	AT1G23985	Protein of unknown function
AT4G07835	AT4G07835	Protein of unknown function
AT5G66052	AT5G66052	Transmembrane protein
AT1G51430	AT1G51430	cTAGE family protein
AT4G34881	AT4G34881	Transmembrane protein
AT3G26395	AT3G26395	Protein of unknown function
AT2G31141	AT2G31141	Encodes a potential nitrate responsive gene
AT1G75945	AT1G75945	Protein of unknown function
AT3G09162	AT3G09162	Protein of unknown function
AT2G35070	AT2G35070	Transmembrane protein
AT3G60950	AT3G60950	C2 calcium/lipid-binding endonuclease/exonuclease/phosphatase
AT2G18460	LCV3	Like COV 3
AT5G53230	AT5G53230	Protein of unknown function
AT1G65481	AT1G65481	Transmembrane protein
AT5G55790	AT5G55790	Protein of unknown function
AT2G14460	AT2G14460	Protein of unknown function
AT1G23915	AT1G23915	Protein of unknown function
Long non-coding RNAs
AT1G67365	AT1G67365	Natural antisense transcript overlaps with AT1G67370
AT3G46658	AT3G46658	Natural antisense transcript overlaps with AT3G46660
AT2G32795	AT2G32795	Unknown RNA
AT1G06103	AT1G06103	Unknown RNA
AT3G02235	AT3G02235	Unknown RNA
AT4G27852	AT4G27852	Natural antisense transcript overlaps with AT4G27850 and AT4G27860
AT4G09432	AT4G09432	Natural antisense transcript overlaps with AT4G09430
AT2G05914	AT2G05914	Potential natural antisense gene, locus overlaps with AT2G05915
AT4G05235	AT4G05235	Long non-coding RNA
AT3G09775	AT3G09775	Long non-coding RNA
