# Supplementary material for: Arabidopsis thaliana Accessions from the Chernobyl Exclusion Zone Show Decreased Sensitivity to Additional Acute Irradiation
Source: Plants (Basel). 2022 Nov 17;11(22):3142. doi: 10.3390/plants11223142 (PMC9697804; doi:10.3390/plants11223142)
Supplement: Supplementary file 1 [file plants-11-03142-s001.zip › Table S4.xlsx]

## Sheet: General
Table S4. Functional enrichment GO analysis for chronically irradiated A. thaliana seedlings

## Sheet: VS-0
Functional enrichment for upregulated genes
GO term	Type of term	Description	p-value	Entries
-	-	-	-	-
Functional enrichment for downregulated genes
GO term	Type of term	Description	p-value	Entries
GO:0006952	Biological Process	defense response	6.3e-08	// AT1G47370 // AT5G35450 // AT4G11340 // AT5G17890 // AT1G72850 // AT4G03460 // AT2G32680 // AT3G11010 // AT5G40990 // AT1G72860 // AT1G72940 // AT3G25020 // AT1G19610 // AT1G72840 // AT4G23160 // AT1G72920 // AT4G11170 // AT5G10760 // AT5G39610 // AT5G28000 // AT4G23140 // AT4G37370 // AT1G73805 // AT5G17880 // AT4G23810 // AT2G43620 // AT4G13810 // AT5G61890 // AT2G14610 // AT3G57260 // AT3G25…
GO:0006468	Biological Process	protein phosphorylation	1.2e-06	// AT4G04510 // AT5G39030 // AT5G59660 // AT3G57640 // AT3G46370 // AT5G01550 // AT1G35710 // AT4G23160 // AT1G21245 // AT4G23140 // AT5G38250 // AT5G62240 // AT4G04500 // AT1G21240 // AT5G47850 // AT4G26890 // AT5G49780 // AT4G00960 // AT2G45660 // AT5G53450 // AT1G65250 // AT5G01540 // AT5G59680 // AT3G45860 // AT4G23150 // AT4G23310 // AT3G05140 // AT4G11890 // AT3G47580 // AT5G38260
GO:0016310	Biological Process	phosphorylation	4e-05	// AT3G43950 // AT4G04510 // AT5G39030 // AT5G59660 // AT3G57640 // AT3G46370 // AT5G01550 // AT1G35710 // AT3G60961 // AT4G23160 // AT1G21245 // AT4G23140 // AT5G38250 // AT5G62240 // AT4G04500 // AT1G21240 // AT5G47850 // AT4G26890 // AT5G49780 // AT4G00960 // AT2G45660 // AT5G53450 // AT1G65250 // AT5G01540 // AT5G59680 // AT3G45860 // AT4G23150 // AT4G23310 // AT3G05140 // AT4G11890 // AT3G47…
GO:0006950	Biological Process	response to stress	0.00023	// AT5G05340 // AT1G47370 // AT5G35450 // AT4G11340 // AT5G17890 // AT1G01680 // AT5G10380 // AT4G03460 // AT2G32680 // AT3G11010 // AT5G40990 // AT1G72860 // AT1G72940 // AT1G27730 // AT3G25020 // AT1G19610 // AT1G72840 // AT5G13170 // AT4G23160 // AT1G72920 // AT4G11170 // AT5G10760 // AT5G39610 // AT5G28000 // AT4G23140 // AT4G37370 // AT1G05880 // AT1G73805 // AT5G17880 // AT4G23810 // AT1G72…
GO:0031349	Biological Process	positive regulation of defense response	0.0025	// AT5G01540 // AT5G40990 // AT1G47370 // AT5G39610 // AT3G56400 // AT4G11890 // AT1G73805
GO:0023052	Biological Process	signaling	0.0025	// AT4G03460 // AT5G59660 // AT4G11340 // AT5G17890 // AT3G46370 // AT2G32680 // AT3G11010 // AT5G01550 // AT5G40990 // AT1G72860 // AT1G72940 // AT5G59920 // AT1G35710 // AT3G25020 // AT1G47370 // AT1G72840 // AT1G72920 // AT4G11170 // AT1G21240 // AT5G17880 // AT4G13810 // AT5G49780 // AT2G25440 // AT3G24982 // AT3G56400 // AT2G45660 // AT1G30220 // AT3G25010 // AT5G01540 // AT1G72870 // AT5G41…
GO:0006796	Biological Process	phosphate-containing compound metabolic process	0.0025	// AT3G43950 // AT4G04510 // AT5G39030 // AT5G59660 // AT3G63320 // AT3G46370 // AT5G01550 // AT1G35710 // AT3G60961 // AT4G23160 // AT1G21245 // AT1G21240 // AT5G38250 // AT1G07160 // AT5G62240 // AT4G04500 // AT1G65250 // AT4G23140 // AT5G47850 // AT4G26890 // AT5G49780 // AT4G00960 // AT2G45660 // AT5G53450 // AT3G57640 // AT5G01540 // AT5G59680 // AT3G45860 // AT4G23150 // AT4G23310 // AT3G05…
GO:0006793	Biological Process	phosphorus metabolic process	0.0025	// AT3G43950 // AT4G04510 // AT5G39030 // AT5G59660 // AT3G63320 // AT3G46370 // AT5G01550 // AT1G35710 // AT3G60961 // AT4G23160 // AT1G21245 // AT1G21240 // AT5G38250 // AT1G07160 // AT5G62240 // AT4G04500 // AT1G65250 // AT4G23140 // AT5G47850 // AT4G26890 // AT5G49780 // AT4G00960 // AT2G45660 // AT5G53450 // AT3G57640 // AT5G01540 // AT5G59680 // AT3G45860 // AT4G23150 // AT4G23310 // AT3G05…
GO:0007165	Biological Process	signal transduction	0.0026	// AT4G03460 // AT5G59660 // AT4G11340 // AT5G17890 // AT3G46370 // AT2G32680 // AT3G11010 // AT5G01550 // AT5G40990 // AT1G72860 // AT1G72940 // AT5G59920 // AT1G35710 // AT3G25020 // AT1G47370 // AT1G72840 // AT1G72920 // AT4G11170 // AT1G21240 // AT5G17880 // AT4G13810 // AT5G49780 // AT2G25440 // AT3G24982 // AT3G56400 // AT2G45660 // AT3G25010 // AT5G01540 // AT1G72870 // AT5G41750 // AT5G61…
GO:0000302	Biological Process	response to reactive oxygen species	0.0026	// AT5G42380 // AT4G23810 // AT4G23150 // AT5G38820 // AT4G11170 // AT5G39610 // AT4G23140 // AT3G02840 // AT5G24110
GO:0036211	Biological Process	protein modification process	0.0026	// AT4G04510 // AT5G39030 // AT5G59660 // AT3G63320 // AT1G01680 // AT3G46370 // AT5G01550 // AT1G35710 // AT4G23160 // AT1G21245 // AT3G61390 // AT4G23140 // AT5G38250 // AT1G05880 // AT1G07160 // AT5G62240 // AT4G04500 // AT1G65250 // AT1G21240 // AT5G47850 // AT4G26890 // AT5G49780 // AT4G00960 // AT2G45660 // AT5G53450 // AT3G57640 // AT5G01540 // AT5G59680 // AT5G27420 // AT3G45860 // AT4G23…
GO:0006464	Biological Process	cellular protein modification process	0.0026	// AT4G04510 // AT5G39030 // AT5G59660 // AT3G63320 // AT1G01680 // AT3G46370 // AT5G01550 // AT1G35710 // AT4G23160 // AT1G21245 // AT3G61390 // AT4G23140 // AT5G38250 // AT1G05880 // AT1G07160 // AT5G62240 // AT4G04500 // AT1G65250 // AT1G21240 // AT5G47850 // AT4G26890 // AT5G49780 // AT4G00960 // AT2G45660 // AT5G53450 // AT3G57640 // AT5G01540 // AT5G59680 // AT5G27420 // AT3G45860 // AT4G23…
GO:0010193	Biological Process	response to ozone	0.0026	// AT3G02840 // AT5G42380 // AT4G11170 // AT5G24110 // AT4G23810
GO:0044700	Biological Process	single organism signaling	0.0031	// AT4G03460 // AT5G59660 // AT4G11340 // AT5G17890 // AT3G46370 // AT2G32680 // AT3G11010 // AT5G01550 // AT5G40990 // AT1G72860 // AT1G72940 // AT5G59920 // AT1G35710 // AT3G25020 // AT1G47370 // AT1G72840 // AT1G72920 // AT4G11170 // AT1G21240 // AT5G17880 // AT4G13810 // AT5G49780 // AT2G25440 // AT3G24982 // AT3G56400 // AT2G45660 // AT3G25010 // AT5G01540 // AT1G72870 // AT5G41750 // AT5G61…
GO:0009627	Biological Process	systemic acquired resistance	0.0031	// AT5G40990 // AT2G14610 // AT3G57260 // AT5G10760 // AT3G56400 // AT1G73805
GO:0009617	Biological Process	response to bacterium	0.0036	// AT5G17880 // AT4G23810 // AT5G01540 // AT5G27420 // AT3G45860 // AT4G23150 // AT3G56400 // AT5G40990 // AT5G10380 // AT4G23160 // AT4G23310 // AT3G44300 // AT4G23140 // AT1G73805
GO:0050896	Biological Process	response to stimulus	0.0044	// AT5G05340 // AT1G47370 // AT5G40010 // AT3G46370 // AT1G02580 // AT5G59660 // AT5G35450 // AT4G11340 // AT3G44300 // AT1G43640 // AT1G01680 // AT2G22880 // AT5G10380 // AT4G03460 // AT2G32680 // AT3G11010 // AT5G01550 // AT5G40990 // AT1G72860 // AT1G72940 // AT5G59920 // AT3G56400 // AT5G63020 // AT1G35710 // AT2G32020 // AT1G19610 // AT1G72840 // AT5G13170 // AT4G23160 // AT1G72920 // AT4G11…
GO:0007154	Biological Process	cell communication	0.0047	// AT4G03460 // AT5G59660 // AT4G11340 // AT5G17890 // AT3G46370 // AT2G32680 // AT3G11010 // AT5G01550 // AT5G40990 // AT1G72860 // AT1G61610 // AT5G59920 // AT1G35710 // AT3G25020 // AT1G47370 // AT1G72840 // AT1G72920 // AT4G11170 // AT1G21240 // AT5G17880 // AT4G13810 // AT5G49780 // AT2G25440 // AT3G24982 // AT3G56400 // AT2G45660 // AT1G72940 // AT3G25010 // AT5G01540 // AT1G72870 // AT5G27…
GO:0042742	Biological Process	defense response to bacterium	0.0056	// AT5G17880 // AT4G23810 // AT5G01540 // AT5G27420 // AT3G45860 // AT4G23150 // AT5G40990 // AT4G23160 // AT4G23310 // AT3G56400 // AT4G23140 // AT1G73805
GO:0010243	Biological Process	response to organonitrogen compound	0.0081	// AT4G23810 // AT2G14610 // AT5G27420 // AT2G17040 // AT5G10380 // AT3G23250 // AT3G56400 // AT1G27730
GO:0009814	Biological Process	defense response, incompatible interaction	0.0091	// AT4G23810 // AT5G40990 // AT2G14610 // AT5G27420 // AT3G57260 // AT5G10760 // AT3G56400 // AT1G73805
GO:0045087	Biological Process	innate immune response	0.0091	// AT4G23810 // AT5G01540 // AT2G14610 // AT5G27420 // AT3G56400 // AT1G47370 // AT5G40990 // AT3G57260 // AT5G10760 // AT5G39610 // AT1G73805
GO:0006955	Biological Process	immune response	0.011	// AT4G23810 // AT5G01540 // AT2G14610 // AT5G27420 // AT3G56400 // AT1G47370 // AT5G40990 // AT3G57260 // AT5G10760 // AT5G39610 // AT1G73805
GO:0010200	Biological Process	response to chitin	0.011	// AT4G23810 // AT5G27420 // AT2G17040 // AT5G10380 // AT3G23250 // AT3G56400 // AT1G27730
GO:0045089	Biological Process	positive regulation of innate immune response	0.011	// AT5G01540 // AT1G47370 // AT3G56400 // AT5G39610 // AT5G40990
GO:0031347	Biological Process	regulation of defense response	0.011	// AT4G23810 // AT5G01540 // AT3G56400 // AT1G47370 // AT5G40990 // AT5G39610 // AT4G03460 // AT4G11890 // AT1G73805
GO:0002684	Biological Process	positive regulation of immune system process	0.011	// AT5G01540 // AT1G47370 // AT3G56400 // AT5G39610 // AT5G40990
GO:0050778	Biological Process	positive regulation of immune response	0.011	// AT5G01540 // AT1G47370 // AT3G56400 // AT5G39610 // AT5G40990
GO:0045088	Biological Process	regulation of innate immune response	0.011	// AT5G01540 // AT5G40990 // AT1G47370 // AT5G39610 // AT3G56400 // AT1G73805
GO:0050776	Biological Process	regulation of immune response	0.013	// AT5G01540 // AT5G40990 // AT1G47370 // AT5G39610 // AT3G56400 // AT1G73805
GO:0009607	Biological Process	response to biotic stimulus	0.013	// AT1G43640 // AT3G44300 // AT5G40990 // AT2G14610 // AT1G19610 // AT4G23160 // AT5G10760 // AT5G28000 // AT4G23140 // AT4G37370 // AT1G73805 // AT5G17880 // AT4G23810 // AT3G57260 // AT5G61890 // AT3G56400 // AT5G01540 // AT5G27420 // AT3G45860 // AT4G23150 // AT5G10380 // AT4G23310 // AT3G02840 // AT4G11890
GO:0051716	Biological Process	cellular response to stimulus	0.014	// AT3G46370 // AT5G59660 // AT4G11340 // AT5G17890 // AT4G03460 // AT2G32680 // AT3G11010 // AT5G01550 // AT5G40990 // AT1G72860 // AT1G72940 // AT5G59920 // AT1G35710 // AT3G25020 // AT1G47370 // AT1G72840 // AT5G13170 // AT1G72920 // AT4G11170 // AT5G39610 // AT5G39770 // AT1G21240 // AT1G05880 // AT1G73805 // AT5G17880 // AT5G38820 // AT4G13810 // AT5G49780 // AT2G25440 // AT3G24982 // AT3G56…
GO:0043207	Biological Process	response to external biotic stimulus	0.017	// AT1G43640 // AT3G44300 // AT5G40990 // AT2G14610 // AT1G19610 // AT4G23160 // AT5G10760 // AT4G23140 // AT4G37370 // AT1G73805 // AT5G17880 // AT4G23810 // AT3G57260 // AT5G61890 // AT3G56400 // AT5G01540 // AT5G27420 // AT3G45860 // AT4G23150 // AT5G10380 // AT4G23310 // AT3G02840 // AT4G11890
GO:0051707	Biological Process	response to other organism	0.017	// AT1G43640 // AT3G44300 // AT5G40990 // AT2G14610 // AT1G19610 // AT4G23160 // AT5G10760 // AT4G23140 // AT4G37370 // AT1G73805 // AT5G17880 // AT4G23810 // AT3G57260 // AT5G61890 // AT3G56400 // AT5G01540 // AT5G27420 // AT3G45860 // AT4G23150 // AT5G10380 // AT4G23310 // AT3G02840 // AT4G11890
GO:0002376	Biological Process	immune system process	0.017	// AT4G23810 // AT5G01540 // AT2G14610 // AT5G27420 // AT3G56400 // AT1G47370 // AT5G40990 // AT3G57260 // AT5G10760 // AT5G39610 // AT1G73805
GO:0002682	Biological Process	regulation of immune system process	0.017	// AT5G01540 // AT5G40990 // AT1G47370 // AT5G39610 // AT3G56400 // AT1G73805
GO:0010224	Biological Process	response to UV-B	0.017	// AT2G22880 // AT1G35210 // AT1G05880 // AT5G59920 // AT1G73805
GO:1901698	Biological Process	response to nitrogen compound	0.02	// AT4G23810 // AT2G14610 // AT5G27420 // AT5G38820 // AT2G17040 // AT5G10380 // AT3G23250 // AT3G56400 // AT1G27730
GO:0098542	Biological Process	defense response to other organism	0.022	// AT5G17880 // AT4G23810 // AT5G01540 // AT2G14610 // AT5G27420 // AT3G45860 // AT4G23150 // AT1G19610 // AT5G61890 // AT3G57260 // AT4G23160 // AT4G23310 // AT5G10760 // AT3G56400 // AT4G23140 // AT4G37370 // AT1G73805 // AT4G11890 // AT5G40990
GO:0006979	Biological Process	response to oxidative stress	0.023	// AT5G05340 // AT5G42380 // AT1G27730 // AT4G23810 // AT4G23150 // AT5G38820 // AT1G72060 // AT4G11170 // AT5G39610 // AT4G23140 // AT3G02840 // AT5G24110
GO:0043412	Biological Process	macromolecule modification	0.026	// AT4G04510 // AT5G39030 // AT5G59660 // AT3G63320 // AT1G01680 // AT3G46370 // AT5G01550 // AT1G35710 // AT4G23160 // AT1G21245 // AT3G61390 // AT4G23140 // AT5G38250 // AT1G05880 // AT1G07160 // AT5G62240 // AT4G04500 // AT1G65250 // AT1G21240 // AT5G47850 // AT4G26890 // AT5G49780 // AT4G00960 // AT2G45660 // AT5G53450 // AT3G57640 // AT5G01540 // AT5G59680 // AT5G27420 // AT3G45860 // AT4G23…
GO:1901700	Biological Process	response to oxygen-containing compound	0.04	// AT4G03460 // AT5G01550 // AT5G40990 // AT2G14610 // AT1G27730 // AT5G24110 // AT5G13170 // AT4G11170 // AT5G39610 // AT4G23140 // AT4G23810 // AT5G38820 // AT3G56400 // AT5G40010 // AT2G45660 // AT2G32020 // AT5G42380 // AT5G01540 // AT5G27420 // AT3G45860 // AT4G23150 // AT2G17040 // AT5G10380 // AT3G23250 // AT3G02840 // AT4G11890
GO:0004674	Molecular Function	protein serine/threonine kinase activity	3.9e-06	// AT4G04510 // AT5G39030 // AT5G59660 // AT3G46370 // AT5G01550 // AT1G35710 // AT4G23160 // AT4G23140 // AT5G38250 // AT4G04500 // AT5G59670 // AT1G21240 // AT5G47850 // AT4G26890 // AT5G49780 // AT5G53450 // AT5G01540 // AT5G59680 // AT3G45860 // AT4G23150 // AT4G23310 // AT3G05140 // AT4G11890 // AT3G47580 // AT5G38260
GO:0016301	Molecular Function	kinase activity	3.9e-06	// AT3G43950 // AT4G04510 // AT5G39030 // AT5G59660 // AT3G57640 // AT3G46370 // AT2G32680 // AT3G11010 // AT5G01550 // AT1G61610 // AT1G35710 // AT3G60961 // AT4G23160 // AT4G23140 // AT5G38250 // AT4G04500 // AT5G59670 // AT1G21240 // AT5G47850 // AT4G26890 // AT5G59650 // AT5G49780 // AT2G25440 // AT5G53450 // AT3G25010 // AT1G65250 // AT5G01540 // AT5G59680 // AT3G45860 // AT4G23150 // AT4G00…
GO:0043531	Molecular Function	ADP binding	3.9e-06	// AT5G17880 // AT5G41750 // AT1G72870 // AT1G72860 // AT5G35450 // AT1G72840 // AT1G72850 // AT5G17890 // AT5G63020 // AT4G11170 // AT1G72910 // AT1G72940
GO:0032559	Molecular Function	adenyl ribonucleotide binding	4e-06	// AT4G04510 // AT5G39030 // AT5G59660 // AT5G35450 // AT3G09620 // AT5G17890 // AT3G57640 // AT3G46370 // AT5G01550 // AT1G72860 // AT1G61610 // AT1G35710 // AT3G60961 // AT1G72840 // AT1G72940 // AT1G21245 // AT4G11170 // AT4G23140 // AT5G38250 // AT1G17960 // AT5G17880 // AT4G04500 // AT5G59670 // AT1G21240 // AT5G47850 // AT4G26890 // AT5G49780 // AT4G00960 // AT5G40010 // AT3G28510 // AT4G16…
GO:0030554	Molecular Function	adenyl nucleotide binding	4e-06	// AT4G04510 // AT5G39030 // AT5G59660 // AT5G35450 // AT3G09620 // AT5G17890 // AT3G57640 // AT3G46370 // AT5G01550 // AT1G72860 // AT1G61610 // AT1G35710 // AT3G60961 // AT1G72840 // AT1G72940 // AT1G21245 // AT4G11170 // AT4G23140 // AT5G38250 // AT1G17960 // AT5G17880 // AT4G04500 // AT5G59670 // AT1G21240 // AT5G47850 // AT4G26890 // AT5G49780 // AT4G00960 // AT5G40010 // AT3G28510 // AT4G16…
GO:0004672	Molecular Function	protein kinase activity	4.8e-06	// AT4G04510 // AT5G39030 // AT5G59660 // AT3G57640 // AT3G46370 // AT5G01550 // AT1G35710 // AT4G23160 // AT4G23140 // AT5G38250 // AT4G04500 // AT5G59670 // AT1G21240 // AT5G47850 // AT4G26890 // AT5G49780 // AT4G00960 // AT5G53450 // AT5G01540 // AT5G59680 // AT3G45860 // AT4G23150 // AT4G23310 // AT3G05140 // AT4G11890 // AT3G47580 // AT5G38260
GO:0097367	Molecular Function	carbohydrate derivative binding	2.1e-05	// AT4G04510 // AT5G39030 // AT5G59660 // AT5G35450 // AT3G09620 // AT5G17890 // AT3G57640 // AT3G46370 // AT1G17990 // AT5G01550 // AT1G72860 // AT1G61610 // AT5G38260 // AT1G35710 // AT3G60961 // AT1G72840 // AT1G72940 // AT2G43620 // AT4G11170 // AT4G23140 // AT5G38250 // AT1G17960 // AT5G17880 // AT4G04500 // AT5G59670 // AT1G21240 // AT5G47850 // AT4G26890 // AT5G49780 // AT4G00960 // AT5G40…
GO:0016772	Molecular Function	transferase activity, transferring phosphorus-containing groups	2.8e-05	// AT3G43950 // AT4G04510 // AT5G39030 // AT5G59660 // AT3G57640 // AT3G46370 // AT2G32680 // AT3G11010 // AT5G01550 // AT1G61610 // AT1G35710 // AT3G60961 // AT4G23160 // AT4G23140 // AT5G38250 // AT4G04500 // AT5G59670 // AT1G21240 // AT5G47850 // AT4G26890 // AT5G59650 // AT5G49780 // AT2G25440 // AT5G53450 // AT3G25010 // AT1G65250 // AT5G01540 // AT5G59680 // AT3G45860 // AT4G23150 // AT4G00…
GO:0032553	Molecular Function	ribonucleotide binding	2.8e-05	// AT4G04510 // AT5G39030 // AT5G59660 // AT5G35450 // AT3G09620 // AT5G17890 // AT3G57640 // AT3G46370 // AT1G17990 // AT5G01550 // AT1G72860 // AT1G61610 // AT1G35710 // AT3G60961 // AT1G72840 // AT1G72940 // AT1G21245 // AT4G11170 // AT4G23140 // AT5G38250 // AT1G17960 // AT5G17880 // AT4G04500 // AT5G59670 // AT1G21240 // AT5G47850 // AT4G26890 // AT5G49780 // AT4G00960 // AT5G40010 // AT3G28…
GO:0032549	Molecular Function	ribonucleoside binding	2.8e-05	// AT4G04510 // AT5G39030 // AT5G59660 // AT5G35450 // AT3G09620 // AT5G17890 // AT3G57640 // AT3G46370 // AT5G01550 // AT1G72860 // AT1G61610 // AT1G35710 // AT3G60961 // AT1G72840 // AT1G72940 // AT1G21245 // AT4G11170 // AT4G23140 // AT5G38250 // AT1G17960 // AT5G17880 // AT4G04500 // AT5G59670 // AT1G21240 // AT5G47850 // AT4G26890 // AT5G49780 // AT4G00960 // AT5G40010 // AT3G28510 // AT4G16…
GO:0032550	Molecular Function	purine ribonucleoside binding	2.8e-05	// AT4G04510 // AT5G39030 // AT5G59660 // AT5G35450 // AT3G09620 // AT5G17890 // AT3G57640 // AT3G46370 // AT5G01550 // AT1G72860 // AT1G61610 // AT1G35710 // AT3G60961 // AT1G72840 // AT1G72940 // AT1G21245 // AT4G11170 // AT4G23140 // AT5G38250 // AT1G17960 // AT5G17880 // AT4G04500 // AT5G59670 // AT1G21240 // AT5G47850 // AT4G26890 // AT5G49780 // AT4G00960 // AT5G40010 // AT3G28510 // AT4G16…
GO:0001883	Molecular Function	purine nucleoside binding	2.8e-05	// AT4G04510 // AT5G39030 // AT5G59660 // AT5G35450 // AT3G09620 // AT5G17890 // AT3G57640 // AT3G46370 // AT5G01550 // AT1G72860 // AT1G61610 // AT1G35710 // AT3G60961 // AT1G72840 // AT1G72940 // AT1G21245 // AT4G11170 // AT4G23140 // AT5G38250 // AT1G17960 // AT5G17880 // AT4G04500 // AT5G59670 // AT1G21240 // AT5G47850 // AT4G26890 // AT5G49780 // AT4G00960 // AT5G40010 // AT3G28510 // AT4G16…
GO:0001882	Molecular Function	nucleoside binding	2.8e-05	// AT4G04510 // AT5G39030 // AT5G59660 // AT5G35450 // AT3G09620 // AT5G17890 // AT3G57640 // AT3G46370 // AT5G01550 // AT1G72860 // AT1G61610 // AT1G35710 // AT3G60961 // AT1G72840 // AT1G72940 // AT1G21245 // AT4G11170 // AT4G23140 // AT5G38250 // AT1G17960 // AT5G17880 // AT4G04500 // AT5G59670 // AT1G21240 // AT5G47850 // AT4G26890 // AT5G49780 // AT4G00960 // AT5G40010 // AT3G28510 // AT4G16…
GO:0017076	Molecular Function	purine nucleotide binding	2.8e-05	// AT4G04510 // AT5G39030 // AT5G59660 // AT5G35450 // AT3G09620 // AT5G17890 // AT3G57640 // AT3G46370 // AT5G01550 // AT1G72860 // AT1G61610 // AT1G35710 // AT3G60961 // AT1G72840 // AT1G72940 // AT1G21245 // AT4G11170 // AT4G23140 // AT5G38250 // AT1G17960 // AT5G17880 // AT4G04500 // AT5G59670 // AT1G21240 // AT5G47850 // AT4G26890 // AT5G49780 // AT4G00960 // AT5G40010 // AT3G28510 // AT4G16…
GO:0032555	Molecular Function	purine ribonucleotide binding	2.8e-05	// AT4G04510 // AT5G39030 // AT5G59660 // AT5G35450 // AT3G09620 // AT5G17890 // AT3G57640 // AT3G46370 // AT5G01550 // AT1G72860 // AT1G61610 // AT1G35710 // AT3G60961 // AT1G72840 // AT1G72940 // AT1G21245 // AT4G11170 // AT4G23140 // AT5G38250 // AT1G17960 // AT5G17880 // AT4G04500 // AT5G59670 // AT1G21240 // AT5G47850 // AT4G26890 // AT5G49780 // AT4G00960 // AT5G40010 // AT3G28510 // AT4G16…
GO:0016773	Molecular Function	phosphotransferase activity, alcohol group as acceptor	2.9e-05	// AT4G04510 // AT5G39030 // AT5G59660 // AT3G57640 // AT3G46370 // AT5G01550 // AT1G35710 // AT4G23160 // AT4G23140 // AT5G38250 // AT4G04500 // AT5G59670 // AT1G21240 // AT5G47850 // AT4G26890 // AT5G49780 // AT4G00960 // AT5G53450 // AT5G01540 // AT5G59680 // AT3G45860 // AT4G23150 // AT4G23310 // AT3G05140 // AT4G11890 // AT3G47580 // AT5G38260
GO:0005524	Molecular Function	ATP binding	0.00038	// AT4G04510 // AT5G39030 // AT5G59660 // AT5G35450 // AT3G09620 // AT5G17890 // AT3G57640 // AT3G46370 // AT5G01550 // AT1G61610 // AT1G35710 // AT3G60961 // AT4G23310 // AT1G21245 // AT4G23140 // AT5G38250 // AT1G17960 // AT5G17880 // AT4G04500 // AT5G59670 // AT1G21240 // AT5G47850 // AT4G26890 // AT5G49780 // AT4G00960 // AT5G40010 // AT4G16680 // AT5G53450 // AT1G65250 // AT5G01540 // AT5G59…
GO:0000166	Molecular Function	nucleotide binding	0.0016	// AT4G04510 // AT5G39030 // AT5G59660 // AT5G35450 // AT3G09620 // AT5G17890 // AT3G57640 // AT3G46370 // AT5G47850 // AT1G17990 // AT5G01550 // AT1G72860 // AT1G61610 // AT1G35710 // AT3G60961 // AT1G72840 // AT1G72940 // AT1G21245 // AT4G11170 // AT4G23140 // AT5G38250 // AT1G17960 // AT5G17880 // AT4G04500 // AT5G59670 // AT1G21240 // AT1G26420 // AT4G26890 // AT5G49780 // AT4G00960 // AT5G40…
GO:1901265	Molecular Function	nucleoside phosphate binding	0.0016	// AT4G04510 // AT5G39030 // AT5G59660 // AT5G35450 // AT3G09620 // AT5G17890 // AT3G57640 // AT3G46370 // AT5G47850 // AT1G17990 // AT5G01550 // AT1G72860 // AT1G61610 // AT1G35710 // AT3G60961 // AT1G72840 // AT1G72940 // AT1G21245 // AT4G11170 // AT4G23140 // AT5G38250 // AT1G17960 // AT5G17880 // AT4G04500 // AT5G59670 // AT1G21240 // AT1G26420 // AT4G26890 // AT5G49780 // AT4G00960 // AT5G40…
GO:0036094	Molecular Function	small molecule binding	0.0023	// AT4G04510 // AT5G39030 // AT5G59660 // AT5G35450 // AT3G09620 // AT5G17890 // AT3G57640 // AT3G46370 // AT5G47850 // AT1G17990 // AT5G01550 // AT1G72860 // AT1G61610 // AT1G35710 // AT3G60961 // AT1G72840 // AT1G72940 // AT1G21245 // AT4G11170 // AT4G23140 // AT5G38250 // AT1G17960 // AT5G17880 // AT4G04500 // AT5G59670 // AT1G21240 // AT1G26420 // AT4G26890 // AT5G49780 // AT4G00960 // AT5G40…
GO:0035639	Molecular Function	purine ribonucleoside triphosphate binding	0.0034	// AT4G04510 // AT5G39030 // AT5G59660 // AT5G35450 // AT3G09620 // AT5G17890 // AT3G57640 // AT3G46370 // AT5G01550 // AT1G61610 // AT1G35710 // AT3G60961 // AT4G23310 // AT1G21245 // AT4G23140 // AT5G38250 // AT1G17960 // AT5G17880 // AT4G04500 // AT5G59670 // AT1G21240 // AT5G47850 // AT4G26890 // AT5G49780 // AT4G00960 // AT5G40010 // AT4G16680 // AT5G53450 // AT1G65250 // AT5G01540 // AT5G59…
GO:0016740	Molecular Function	transferase activity	0.0037	// AT3G43950 // AT4G04510 // AT1G02580 // AT5G39030 // AT5G59660 // AT3G53150 // AT3G57640 // AT1G01680 // AT3G46370 // AT4G15260 // AT2G32680 // AT3G11010 // AT5G42830 // AT5G01550 // AT1G61610 // AT1G35710 // AT3G60961 // AT3G13440 // AT4G23160 // AT2G36800 // AT3G61390 // AT4G23140 // AT5G38250 // AT1G05880 // AT3G25010 // AT4G04500 // AT4G15270 // AT5G59670 // AT1G21240 // AT5G47850 // AT4G26…
GO:0099600	Molecular Function	transmembrane receptor activity	0.039	// AT2G29120 // AT2G29100 // AT5G59670 // AT5G11210 // AT3G05140 // AT2G29110
GO:0005509	Molecular Function	calcium ion binding	0.039	// AT5G42380 // AT3G29000 // AT3G47480 // AT3G01830 // AT2G20800 // AT1G21240 // AT4G21490 // AT5G39670

## Sheet: Masa-0
Functional enrichment for upregulated genes
GO term	Type of term	Description	p-value	Entries
GO:0043531	Molecular Function	ADP binding	0.00023	// AT5G46490 // AT1G63870 // AT5G46510 // AT4G36140 // AT1G63860 // AT4G19500 // AT1G58602 // AT5G47280
Functional enrichment for downregulated genes
GO term	Type of term	Description	p-value	Entries
GO:0004674	Molecular Function	protein serine/threonine kinase activity	0.048	// AT5G39000 // AT5G01550 // AT4G12020 // AT5G06740 // AT4G13160 // AT5G49780 // AT3G47580
GO:0016301	Molecular Function	kinase activity	0.048	// AT5G39000 // AT5G01550 // AT4G31110 // AT4G12020 // AT5G06740 // AT4G13160 // AT3G60961 // AT5G49780 // AT3G53840 // AT3G47580
GO:0030246	Molecular Function	carbohydrate binding	0.048	// AT2G26820 // AT5G01550 // AT3G53840 // AT4G31110 // AT5G06740
