# Supplementary material for: Arabidopsis thaliana Accessions from the Chernobyl Exclusion Zone Show Decreased Sensitivity to Additional Acute Irradiation
Source: Plants (Basel). 2022 Nov 17;11(22):3142. doi: 10.3390/plants11223142 (PMC9697804; doi:10.3390/plants11223142)
Supplement: Supplementary file 1 [file plants-11-03142-s001.zip › Table S5.xlsx]

## Sheet: General
Table S5. Differential gene expression for additionally gamma-irradiated A. thaliana seedlings

## Sheet: Bab-0
Gene	Symbol	log2FC	p-value	FDR	Description
AT3G12230	SCPL14	10.7447	0.000119577	0.00606643	serine carboxypeptidase-like 14
AT1G65483	AT1G65483	10.6095	5.76149e-07	0.000473846
AT2G28680	AT2G28680	10.2085	0.000329831	0.0107732	RmlC-like cupins superfamily protein
AT1G06983	AT1G06983	10.028	0.00199632	0.030506
AT1G28650	AT1G28650	9.03813	0.000602311	0.0154931	GDSL-like Lipase/Acylhydrolase superfamily protein
AT3G21500	DXPS1	8.7429	0.00101405	0.0209303	1-deoxy-D-xylulose 5-phosphate synthase 1
AT2G35070	AT2G35070	8.43186	1.36217e-05	0.00198333
AT3G55970	JRG21	7.75911	0.000130555	0.00648227	jasmonate-regulated gene 21
AT5G28237	AT5G28237	7.59111	0.000254722	0.00933158	Pyridoxal-5'-phosphate-dependent enzyme family protein
AT1G14250	APY5	7.40619	2.00107e-05	0.0023772	GDA1/CD39 nucleoside phosphatase family protein
AT5G65080	MAF5	6.92629	0.00200182	0.0305318	K-box region and MADS-box transcription factor family protein
AT3G22090	AT3G22090	6.77245	0.002976	0.0386302
AT5G43650	BHLH92	6.72726	1.28527e-05	0.00195872	basic helix-loop-helix (bHLH) DNA-binding superfamily protein
AT3G52680	AT3G52680	6.67596	6.0406e-05	0.00404282	F-box/RNI-like/FBD-like domains-containing protein
AT1G62760	PMEI10	6.11889	5.73608e-06	0.00139382	Plant invertase/pectin methylesterase inhibitor superfamily protein
AT3G46658	AT3G46658	6.11762	0.00124158	0.023311	other RNA
AT2G44240	AT2G44240	6.07645	3.65222e-06	0.0010183	Protein of Unknown Function (DUF239)
AT4G37990	CAD8	6.01344	2.27471e-05	0.00251319	elicitor-activated gene 3-2
AT2G38240	ANS	5.96197	8.67983e-06	0.00165601	2-oxoglutarate (2OG) and Fe(II)-dependent oxygenase superfamily protein
AT2G39030	NATA1	5.90189	0.00192536	0.0299061	Acyl-CoA N-acyltransferases (NAT) superfamily protein
AT2G29470	GSTU3	5.31418	6.99775e-05	0.00440968	glutathione S-transferase tau 3
AT1G32960	SBT3.3	5.24341	3.641e-07	0.000364953	Subtilase family protein
AT5G46960	PMEI12	4.98577	0.00119956	0.0228886	Plant invertase/pectin methylesterase inhibitor superfamily protein
AT5G07550	GRP19	4.87011	0.000769212	0.0177964	glycine-rich protein 19
AT2G14610	PR1	4.68397	3.91847e-06	0.00105618	pathogenesis-related gene 1
AT5G22545	AT5G22545	4.62131	0.00104256	0.0212134
AT5G57550	XTH25	4.60764	1.15356e-07	0.000173132	xyloglucan endotransglucosylase/hydrolase 25
AT1G15330	PV42A	4.49351	0.000409577	0.0122575	Cystathionine beta-synthase (CBS) protein
AT3G60140	BGLU30	4.36931	0.00419377	0.0477528	Glycosyl hydrolase superfamily protein
AT4G36950	MAPKKK21	4.26917	0.0013713	0.0247362	mitogen-activated protein kinase kinase kinase 21
AT1G21245	AT1G21245	4.12745	4.69439e-06	0.00119396	Protein kinase superfamily protein
AT2G24850	TAT3	4.09272	0.000470619	0.0134425	tyrosine aminotransferase 3
AT3G13433	AT3G13433	4.07185	0.00420582	0.0477528
AT1G69930	GSTU11	4.01476	0.000671851	0.0164125	glutathione S-transferase TAU 11
AT4G04490	CRK36	4.0048	6.81586e-05	0.00431201	cysteine-rich RLK (RECEPTOR-like protein kinase) 36
AT4G29570	CDA8	3.98487	1.28675e-05	0.00195872	Cytidine/deoxycytidylate deaminase family protein
AT1G32350	AOX3	3.92523	0.00386227	0.0452621	alternative oxidase 1D
AT3G60966	AT3G60966	3.88198	2.22366e-07	0.000247191	RING/U-box superfamily protein
AT5G01900	WRKY62	3.86826	4.44715e-05	0.00343716	WRKY DNA-binding protein 62
AT5G59590	UGT76E2	3.86639	0.000157562	0.00715861	UDP-glucosyl transferase 76E2
AT1G61120	GES	3.85961	0.00167677	0.0275949	terpene synthase 04
AT2G23110	AT2G23110	3.84009	6.24805e-05	0.00410668	Late embryogenesis abundant protein, group 6
AT2G32660	AtRLP22	3.79304	8.5861e-05	0.00494433	receptor like protein 22
AT4G18980	AtS40-3	3.77218	0.000184977	0.00781706	AtS40-3
AT4G25810	XTH23	3.7274	3.19713e-06	0.000958393	xyloglucan endotransglycosylase 6
AT3G48580	XTH11	3.69653	5.60474e-05	0.0038938	xyloglucan endotransglucosylase/hydrolase 11
AT1G18830	SEC31A	3.67574	8.5235e-06	0.00165601	Transducin/WD40 repeat-like superfamily protein
AT2G06185	AT2G06185	3.66214	0.00022095	0.00865319
AT1G21240	WAK3	3.65362	9.74325e-09	7.48287e-05	wall associated kinase 3
AT2G47770	TSPO	3.63526	0.00240971	0.0339372	TSPO(outer membrane tryptophan-rich sensory protein)-related
AT5G13080	WRKY75	3.63009	2.50178e-07	0.000258853	WRKY DNA-binding protein 75
AT2G47190	ATMYB2	3.59332	1.4698e-05	0.00209528	myb domain protein 2
AT5G06730	PER54	3.56723	0.000158403	0.00716612	Peroxidase superfamily protein
AT5G14180	LIP2	3.55524	2.92586e-06	0.000938469	Myzus persicae-induced lipase 1
AT5G43570	AT5G43570	3.50724	0.00333911	0.0415223	Serine protease inhibitor, potato inhibitor I-type family protein
AT2G43570	CHI	3.4683	0.00158704	0.02682	chitinase, putative
AT1G79680	WAKL10	3.46208	1.55747e-06	0.000691046	WALL ASSOCIATED KINASE (WAK)-LIKE 10
AT5G39520	AT5G39520	3.45414	0.000215973	0.00860538	Protein of unknown function (DUF1997)
AT5G57510	AT5G57510	3.44266	6.49844e-05	0.00421938
AT1G67980	CCOAMT	3.33674	0.00310552	0.039717	caffeoyl-CoA 3-O-methyltransferase
AT5G49420	AT5G49420	3.31697	0.0018877	0.0296223	MADS-box transcription factor family protein
AT5G44990	AT5G44990	3.3133	0.00106449	0.0215124	Glutathione S-transferase family protein
AT1G52040	MBP1	3.30243	0.00111513	0.0220214	myrosinase-binding protein 1
AT1G47890	AtRLP7	3.28946	6.5534e-05	0.00422939	receptor like protein 7
AT1G45145	TRX5	3.24977	3.34992e-06	0.000985768	thioredoxin H-type 5
AT4G21840	MSRB8	3.24738	2.17145e-05	0.00246943	methionine sulfoxide reductase B8
AT2G25440	AtRLP20	3.2436	0.000480287	0.0136163	receptor like protein 20
AT2G14620	XTH10	3.2198	6.38667e-05	0.00418066	xyloglucan endotransglucosylase/hydrolase 10
AT1G74010	AT1G74010	3.20815	5.1183e-08	0.000149245	Calcium-dependent phosphotriesterase superfamily protein
AT1G73260	KTI1	3.20419	8.66351e-05	0.00495334	kunitz trypsin inhibitor 1
AT3G26830	CYP71B15	3.18686	0.00352197	0.042937	Cytochrome P450 superfamily protein
AT1G66860	AT1G66860	3.18503	2.21303e-07	0.000247191	Class I glutamine amidotransferase-like superfamily protein
AT5G59580	UGT76E1	3.16928	0.00154528	0.0264176	UDP-glucosyl transferase 76E1
AT3G28580	AT3G28580	3.14735	0.00378491	0.044847	P-loop containing nucleoside triphosphate hydrolases superfamily protein
AT3G12910	AT3G12910	3.13962	0.00277301	0.0369063	NAC (No Apical Meristem) domain transcriptional regulator superfamily protein
AT3G54150	AT3G54150	3.13448	0.000105682	0.00569703	S-adenosyl-L-methionine-dependent methyltransferases superfamily protein
AT2G35980	NHL10	3.11704	0.00238611	0.0338349	Late embryogenesis abundant (LEA) hydroxyproline-rich glycoprotein family
AT3G45130	LAS1	3.11254	0.00041284	0.0123065	lanosterol synthase 1
AT2G33130	RALFL18	3.09825	0.000529634	0.0142965	ralf-like 18
AT5G59220	SAG113	3.08572	2.40282e-05	0.00256047	highly ABA-induced PP2C gene 1
AT4G04510	CRK38	3.08527	6.3852e-06	0.00147395	cysteine-rich RLK (RECEPTOR-like protein kinase) 38
AT1G04580	AAO4	3.08316	0.00076187	0.0176906	aldehyde oxidase 4
AT5G53870	ENODL1	3.07936	1.29742e-05	0.00195872	early nodulin-like protein 1
AT4G21120	CAT1	3.07682	0.000504815	0.0139197	amino acid transporter 1
AT1G52890	NAC019	3.06074	0.000872159	0.0191083	NAC domain containing protein 19
AT5G27060	AtRLP53	3.05994	5.33438e-05	0.00382775	receptor like protein 53
AT5G24200	AT5G24200	3.05459	1.1875e-07	0.000173132	alpha/beta-Hydrolases superfamily protein
AT1G13340	AT1G13340	3.05351	5.07231e-07	0.000439714	Regulator of Vps4 activity in the MVB pathway protein
AT1G35230	AGP5	3.04754	7.4897e-06	0.00153995	arabinogalactan protein 5
AT4G32810	CCD8	3.04198	4.84372e-05	0.00363846	carotenoid cleavage dioxygenase 8
AT2G02580	CYP71B9	3.0401	0.00079676	0.0181635	cytochrome P450, family 71, subfamily B, polypeptide 9
AT3G10320	AT3G10320	3.01297	1.57738e-08	8.43242e-05	Glycosyltransferase family 61 protein
AT1G19610	PDF1.4	3.00842	1.03564e-06	0.00059318	Arabidopsis defensin-like protein
AT3G44300	NIT2	2.98812	0.00103998	0.0212134	nitrilase 2
AT5G48400	GLR1.2	2.9858	0.00248642	0.034609	Glutamate receptor family protein
AT3G18250	AT3G18250	2.95578	0.000144992	0.00682912	Putative membrane lipoprotein
AT1G08630	THA1	2.94764	0.000848292	0.0187803	threonine aldolase 1
AT1G30100	NCED5	2.89006	0.00445706	0.0494159	nine-cis-epoxycarotenoid dioxygenase 5
AT1G68290	ENDO2	2.88078	1.85397e-05	0.00227839	endonuclease 2
AT3G53040	AT3G53040	2.87573	0.000505858	0.0139197	late embryogenesis abundant protein, putative / LEA protein, putative
AT1G68620	CXE6	2.87279	4.34549e-05	0.00338204	alpha/beta-Hydrolases superfamily protein
AT5G66150	AT5G66150	2.86709	0.00193986	0.0300149	Glycosyl hydrolase family 38 protein
AT1G06100	AT1G06100	2.85738	0.00066549	0.0163174	Fatty acid desaturase family protein
AT5G03210	AT5G03210	2.85581	0.00130322	0.0239546
AT1G28480	GRXC9	2.8499	0.00333944	0.0415223	Thioredoxin superfamily protein
AT3G61198	AT3G61198	2.83719	6.1077e-05	0.00404678	other RNA
AT3G57700	AT3G57700	2.83361	7.93937e-06	0.00161311	Protein kinase superfamily protein
AT1G44130	AT1G44130	2.83159	0.00420167	0.0477528	Eukaryotic aspartyl protease family protein
AT1G61440	AT1G61440	2.82511	1.31817e-05	0.00195872	S-locus lectin protein kinase family protein
AT4G28085	AT4G28085	2.81968	0.000415968	0.0123791
AT3G13130	AT3G13130	2.80864	0.000335072	0.010856
AT1G02920	GSTF7	2.77905	1.89254e-05	0.00230811	glutathione S-transferase 7
AT4G13920	AtRLP50	2.76714	2.26366e-05	0.00251319	receptor like protein 50
AT3G46230	HSP17.4A	2.76593	0.00023236	0.00888312	heat shock protein 17.4
AT1G55230	AT1G55230	2.75847	0.00145022	0.0254741	Family of unknown function (DUF716)
AT5G52720	AT5G52720	2.74071	9.54497e-05	0.00533724	Copper transport protein family
AT1G60130	JAL18	2.73441	3.19231e-05	0.00290586	Mannose-binding lectin superfamily protein
AT1G09380	AT1G09380	2.733	0.000657151	0.0162052	nodulin MtN21 /EamA-like transporter family protein
AT1G30135	TIFY5A	2.7268	0.00133171	0.0243517	jasmonate-zim-domain protein 8
AT2G25297	AT2G25297	2.71	2.59134e-05	0.002622
AT1G69920	GSTU12	2.70932	0.000394127	0.0119771	glutathione S-transferase TAU 12
AT4G21830	MSRB7	2.70918	4.30018e-05	0.0033641	methionine sulfoxide reductase B7
AT4G39670	AT4G39670	2.70758	7.8079e-08	0.000166959	Glycolipid transfer protein (GLTP) family protein
AT2G30550	AT2G30550	2.6981	3.50706e-09	7.48287e-05	alpha/beta-Hydrolases superfamily protein
AT5G11920	CWINV6	2.69144	1.12788e-06	0.000613164	6-&1-fructan exohydrolase
AT2G34500	CYP710A1	2.69134	0.000212221	0.00848753	cytochrome P450, family 710, subfamily A, polypeptide 1
AT1G74080	MYB122	2.6783	0.00155026	0.0264633	myb domain protein 122
AT3G49120	PER34	2.6769	4.84712e-07	0.000431865	peroxidase CB
AT5G01380	GT-3A	2.67399	4.29085e-05	0.0033641	Homeodomain-like superfamily protein
AT5G11210	GLR2.5	2.64248	2.7254e-05	0.0027147	glutamate receptor 2.5
AT4G37530	PER51	2.63592	1.00996e-07	0.000169228	Peroxidase superfamily protein
AT2G43510	ATTI1	2.63377	5.687e-06	0.00139245	trypsin inhibitor protein 1
AT2G01008	AT2G01008	2.63291	0.000642633	0.0160464
AT5G46350	WRKY8	2.62735	2.09281e-05	0.00245886	WRKY DNA-binding protein 8
AT3G63380	ACA12	2.62052	1.16646e-08	7.48287e-05	ATPase E1-E2 type family protein / haloacid dehalogenase-like hydrolase family protein
AT1G57630	AT1G57630	2.61249	0.000794368	0.0181219	Toll-Interleukin-Resistance (TIR) domain family protein
AT3G13790	CWINV1	2.61118	2.77312e-06	0.00090763	Glycosyl hydrolases family 32 protein
AT3G13950	AT3G13950	2.60203	0.000873048	0.0191147
AT3G08860	PYD4	2.59217	0.000178474	0.00766505	PYRIMIDINE 4
AT4G27852	AT4G27852	2.58771	0.00157528	0.0267198
AT5G48410	GLR1.3	2.57364	5.59803e-05	0.0038938	glutamate receptor 1.3
AT2G04495	AT2G04495	2.56744	0.00357023	0.0432295
AT1G01680	PUB54	2.56467	0.000373173	0.0115587	plant U-box 54
AT4G23700	CHX17	2.55828	7.45299e-06	0.00153995	cation/H+ exchanger 17
AT3G23120	AtRLP38	2.55556	0.00266051	0.0359309	receptor like protein 38
AT2G33020	AtRLP24	2.55265	0.00253722	0.0349861	receptor like protein 24
AT1G51890	AT1G51890	2.52574	8.05584e-07	0.000528814	Leucine-rich repeat protein kinase family protein
AT1G09080	MED37B	2.51255	4.31855e-06	0.00110814	Heat shock protein 70 (Hsp 70) family protein
AT2G19500	CKX2	2.51018	0.00170735	0.0278551	cytokinin oxidase 2
AT3G23240	ERF1B	2.50694	3.65791e-06	0.0010183	ethylene response factor 1
AT4G23150	CRK7	2.49269	9.21547e-05	0.00522237	cysteine-rich RLK (RECEPTOR-like protein kinase) 7
AT5G07650	AT5G07650	2.49104	2.57065e-05	0.00261392	Actin-binding FH2 protein
AT3G15536	AT3G15536	2.4903	0.000203329	0.00829743
AT2G21510	AT2G21510	2.48044	0.000473819	0.0134971	DNAJ heat shock N-terminal domain-containing protein
AT1G59950	AT1G59950	2.47628	0.000886937	0.0193133	NAD(P)-linked oxidoreductase superfamily protein
AT5G46050	NPF5.2	2.47254	0.000119721	0.00606643	peptide transporter 3
AT4G15280	UGT71B5	2.46891	4.14904e-05	0.00330224	UDP-glucosyl transferase 71B5
AT1G72120	NPF5.14	2.46006	2.12499e-07	0.000247191	Major facilitator superfamily protein
AT3G22600	AT3G22600	2.45998	0.0041705	0.0476237	Bifunctional inhibitor/lipid-transfer protein/seed storage 2S albumin superfamily protein
AT1G02220	NAC003	2.45283	0.00119048	0.0228184	NAC domain containing protein 3
AT1G66700	PXMT1	2.45107	9.97158e-07	0.000581525	S-adenosyl-L-methionine-dependent methyltransferases superfamily protein
AT1G14880	PCR1	2.44565	0.00442133	0.0491727	PLANT CADMIUM RESISTANCE 1
AT1G16420	AMC8	2.43965	5.63967e-05	0.0038938	metacaspase 8
AT3G50770	CML41	2.43388	3.09531e-05	0.00285293	calmodulin-like 41
AT5G58680	AT5G58680	2.43168	0.00375157	0.0445637	ARM repeat superfamily protein
AT1G65970	PRXIIC	2.43086	1.62876e-05	0.00210943	thioredoxin-dependent peroxidase 2
AT3G01080	WRKY58	2.42747	7.33979e-07	0.000525898	WRKY DNA-binding protein 58
AT2G02930	GSTF3	2.42261	0.000116311	0.00601721	glutathione S-transferase F3
AT1G71140	DTX14	2.41454	4.8601e-05	0.00364224	MATE efflux family protein
AT4G40020	AT4G40020	2.4119	2.42762e-05	0.00256047	Myosin heavy chain-related protein
AT3G48850	MPT2	2.41161	0.00112363	0.0220834	phosphate transporter 3;2
AT5G49690	UGT91C1	2.40497	3.96713e-05	0.00322141	UDP-Glycosyltransferase superfamily protein
AT4G03450	AT4G03450	2.40382	0.000334601	0.010856	Ankyrin repeat family protein
AT1G52990	AT1G52990	2.40312	0.000326845	0.0106975	thioredoxin family protein
AT3G61190	BAP1	2.40126	1.78506e-06	0.000716252	BON association protein 1
AT3G57260	BGL2	2.3939	5.76461e-05	0.00392569	beta-1,3-glucanase 2
AT4G23140	CRK6	2.39095	0.000652971	0.0161703	cysteine-rich RLK (RECEPTOR-like protein kinase) 6
AT5G64890	PEP2	2.37463	0.00287756	0.0377829	elicitor peptide 2 precursor
AT2G33380	PXG3	2.37353	0.00119443	0.0228386	Caleosin-related family protein
AT3G01970	WRKY45	2.34363	0.000217248	0.00862405	WRKY DNA-binding protein 45
AT1G17380	TIFY11A	2.34282	3.65279e-05	0.00309995	jasmonate-zim-domain protein 5
AT5G05600	AT5G05600	2.3392	0.00162499	0.0271608	2-oxoglutarate (2OG) and Fe(II)-dependent oxygenase superfamily protein
AT4G30430	TET9	2.33579	0.00254654	0.0350409	tetraspanin9
AT1G67000	LRK10L-2.8	2.33091	0.000445491	0.0129313	Protein kinase superfamily protein
AT3G28210	SAP12	2.32619	0.0010443	0.0212134	zinc finger (AN1-like) family protein
AT5G44567	AT5G44567	2.3247	8.54203e-06	0.00165601
AT5G25260	FLOT2	2.32409	1.95058e-06	0.000736058	SPFH/Band 7/PHB domain-containing membrane-associated protein family
AT3G11402	AT3G11402	2.32341	1.78963e-06	0.000716252	Cysteine/Histidine-rich C1 domain family protein
AT4G27480	AT4G27480	2.31735	1.23879e-05	0.00195872	Core-2/I-branching beta-1,6-N-acetylglucosaminyltransferase family protein
AT3G28540	AT3G28540	2.30609	5.06325e-09	7.48287e-05	P-loop containing nucleoside triphosphate hydrolases superfamily protein
AT1G79900	BAC2	2.3047	0.000491581	0.0137228	Mitochondrial substrate carrier family protein
AT3G44860	FAMT	2.30006	2.312e-07	0.000247191	farnesoic acid carboxyl-O-methyltransferase
AT1G02930	GSTF6	2.29953	2.85539e-05	0.00275914	glutathione S-transferase 6
AT4G30270	XTH24	2.29266	1.12948e-05	0.00185785	xyloglucan endotransglucosylase/hydrolase 24
AT3G29810	COBL3	2.2926	4.1005e-05	0.00329572	COBRA-like protein 2 precursor
AT1G17020	SRG1	2.29254	8.15882e-05	0.00479376	senescence-related gene 1
AT4G15610	AT4G15610	2.28794	2.57521e-05	0.00261392	Uncharacterised protein family (UPF0497)
AT3G11080	AtRLP35	2.27814	2.9068e-05	0.00276664	receptor like protein 35
AT3G11010	AtRLP34	2.27415	0.00024556	0.00912671	receptor like protein 34
AT3G22910	ACA13	2.27144	7.18719e-06	0.00152668	ATPase E1-E2 type family protein / haloacid dehalogenase-like hydrolase family protein
AT5G50260	CEP1	2.26736	0.000181014	0.00774752	Cysteine proteinases superfamily protein
AT1G75000	AT1G75000	2.26143	0.00117568	0.0226254	GNS1/SUR4 membrane protein family
AT3G47480	CML47	2.25661	0.000277549	0.00982204	Calcium-binding EF-hand family protein
AT2G43000	JUB1	2.25054	0.00026398	0.00952435	NAC domain containing protein 42
AT1G50040	AT1G50040	2.25013	0.000326731	0.0106975	Protein of unknown function (DUF1005)
AT4G23160	CRK8	2.24404	0.000198043	0.00814389	cysteine-rich RLK (RECEPTOR-like protein kinase) 8
AT1G64660	MGL	2.24373	0.00028752	0.0100056	methionine gamma-lyase
AT1G15040	GAT1_2.1	2.24269	0.000310661	0.0103699	Class I glutamine amidotransferase-like superfamily protein
AT1G52000	JAL5	2.24222	0.00106573	0.0215124	Mannose-binding lectin superfamily protein
AT5G38900	AT5G38900	2.23494	0.000197601	0.00814389	Thioredoxin superfamily protein
AT1G53100	AT1G53100	2.22288	0.000504343	0.0139197	Core-2/I-branching beta-1,6-N-acetylglucosaminyltransferase family protein
AT4G10860	AT4G10860	2.21813	0.00389484	0.0454776
AT3G08870	AT3G08870	2.20668	0.00126786	0.0235724	Concanavalin A-like lectin protein kinase family protein
AT3G25020	AtRLP42	2.20144	0.000393435	0.0119771	receptor like protein 42
AT3G60415	AT3G60415	2.19912	0.000144638	0.00682912
AT4G31230	AT4G31230	2.19617	0.0039796	0.0460815	Protein kinase protein with adenine nucleotide alpha hydrolases-like domain
AT3G26220	CYP71B3	2.19422	4.3954e-05	0.00340537	cytochrome P450, family 71, subfamily B, polypeptide 3
AT1G61810	BGLU45	2.19277	6.46178e-05	0.00420409	beta-glucosidase 45
AT1G22400	UGT85A1	2.18799	0.000196815	0.00812626	UDP-Glycosyltransferase superfamily protein
AT3G25010	AtRLP41	2.17611	0.000689379	0.016588	receptor like protein 41
AT5G38250	LRK10L-2.3	2.17337	0.000147667	0.00691302	Protein kinase family protein
AT3G51660	AT3G51660	2.16441	2.80266e-08	0.000111432	Tautomerase/MIF superfamily protein
AT3G46280	AT3G46280	2.16347	2.89691e-05	0.00276542	protein kinase-related
AT4G01895	AT4G01895	2.15962	6.01574e-05	0.00404282	systemic acquired resistance (SAR) regulator protein NIMIN-1-related
AT3G04070	NAC047	2.15912	1.9597e-07	0.000247191	NAC domain containing protein 47
AT4G00690	ULP1B	2.1575	9.32269e-08	0.000169228	UB-like protease 1B
AT1G51860	AT1G51860	2.15727	6.50793e-08	0.000158904	Leucine-rich repeat protein kinase family protein
AT3G51450	SSL7	2.15163	9.49645e-07	0.000564071	Calcium-dependent phosphotriesterase superfamily protein
AT4G11890	AT4G11890	2.14481	0.000342839	0.0110004	Protein kinase superfamily protein
AT1G70140	FH8	2.14466	7.43306e-07	0.000525898	formin 8
AT3G61280	AT3G61280	2.13905	0.000181942	0.00776035	Arabidopsis thaliana protein of unknown function (DUF821)
AT4G33150	AT4G33150	2.13781	0.000220718	0.00865319	lysine-ketoglutarate reductase/saccharopine dehydrogenase bifunctional enzyme
AT3G09520	ATEXO70H4	2.13685	7.66794e-05	0.00466512	exocyst subunit exo70 family protein H4
AT1G24147	AT1G24147	2.13449	0.000179296	0.00768839
AT1G51760	ILL4	2.11989	9.74728e-08	0.000169228	peptidase M20/M25/M40 family protein
AT2G32140	AT2G32140	2.11886	0.00114116	0.0222373	transmembrane receptors
AT4G11650	OSM34	2.10946	0.00160483	0.0269502	osmotin 34
AT5G64510	TIN1	2.10896	8.23877e-06	0.00162737
AT5G25910	AtRLP52	2.10723	0.0016953	0.0277432	receptor like protein 52
AT5G13200	AT5G13200	2.1072	1.65163e-06	0.000697052	GRAM domain family protein
AT1G32940	SBT3.5	2.10609	1.9079e-06	0.000734672	Subtilase family protein
AT2G38340	DREB2E	2.09329	0.00443016	0.049202	Integrase-type DNA-binding superfamily protein
AT4G11170	AT4G11170	2.09011	0.00141594	0.0251614	Disease resistance protein (TIR-NBS-LRR class) family
AT5G16360	AT5G16360	2.08931	1.18039e-06	0.000620672	NC domain-containing protein-related
AT1G65690	NHL6	2.08819	0.000219116	0.00863256	Late embryogenesis abundant (LEA) hydroxyproline-rich glycoprotein family
AT3G49780	PSK3	2.08293	1.30465e-06	0.000626799	phytosulfokine 4 precursor
AT3G28510	AT3G28510	2.08234	0.000821124	0.0184566	P-loop containing nucleoside triphosphate hydrolases superfamily protein
AT1G03850	AT1G03850	2.08074	4.50167e-05	0.00347094	Glutaredoxin family protein
AT5G22300	NIT4	2.07796	0.00111913	0.0220271	nitrilase 4
AT1G47510	IP5P11	2.07691	0.00157804	0.0267517	inositol polyphosphate 5-phosphatase 11
AT5G62150	AT5G62150	2.07143	0.000317865	0.0105002	peptidoglycan-binding LysM domain-containing protein
AT5G65600	LECRK92	2.06349	5.11993e-05	0.00376655	Concanavalin A-like lectin protein kinase family protein
AT4G14640	CML8	2.06241	4.12293e-05	0.00329589	calmodulin 8
AT1G65730	YSL7	2.06145	2.41606e-06	0.000807242	YELLOW STRIPE like 7
AT3G08970	ERDJ3A	2.05873	1.30332e-05	0.00195872	DNAJ heat shock N-terminal domain-containing protein
AT4G11655	AT4G11655	2.05677	0.002107	0.031403	Uncharacterised protein family (UPF0497)
AT1G26420	FOX5	2.05517	0.000482591	0.01363	FAD-binding Berberine family protein
AT2G15220	AT2G15220	2.05489	0.00279644	0.0371023	Plant basic secretory protein (BSP) family protein
AT1G68450	VQ8	2.05484	0.00219831	0.0321087	VQ motif-containing protein
AT1G61610	AT1G61610	2.05201	0.000344052	0.0110027	S-locus lectin protein kinase family protein
AT2G36770	UGT73C4	2.05059	0.0018646	0.0295015	UDP-Glycosyltransferase superfamily protein
AT3G60540	AT3G60540	2.04499	0.000284327	0.00992419	Preprotein translocase Sec, Sec61-beta subunit protein
AT4G23260	CRK18	2.04226	1.80877e-06	0.000716252	cysteine-rich RLK (RECEPTOR-like protein kinase) 18
AT2G42360	ATL41	2.03185	0.000447035	0.012941	RING/U-box superfamily protein
AT5G20230	BCB	2.02872	6.6004e-05	0.00423307	blue-copper-binding protein
AT5G04390	AT5G04390	2.02833	8.21081e-05	0.00480587	C2H2-type zinc finger family protein
AT1G73810	AT1G73810	2.02567	8.75427e-06	0.00165601	Core-2/I-branching beta-1,6-N-acetylglucosaminyltransferase family protein
AT1G70690	CRRSP2	2.02319	6.93579e-08	0.000158904	Receptor-like protein kinase-related family protein
AT2G45360	AT2G45360	2.01966	0.00184169	0.0292436	Protein of unknown function (DUF1442)
AT1G74590	GSTU10	2.01838	0.000287612	0.0100056	glutathione S-transferase TAU 10
AT4G39030	DTX47	2.0107	1.3993e-05	0.00201268	MATE efflux family protein
AT1G21390	emb2170	2.0083	8.43236e-07	0.000537511	embryo defective 2170
AT2G15080	AtRLP19	2.00731	7.28862e-07	0.000525898	receptor like protein 19
AT4G37520	PER50	2.00533	1.45525e-07	0.000202945	Peroxidase superfamily protein
AT5G26690	HIPP02	2.00429	0.000368335	0.0115262	Heavy metal transport/detoxification superfamily protein
AT3G51440	SSL6	2.00376	9.83042e-08	0.000169228	Calcium-dependent phosphotriesterase superfamily protein
AT1G18140	LAC1	-2.00239	0.00148846	0.0258767	laccase 1
AT2G35380	PER20	-2.01482	0.00406764	0.0468212	Peroxidase superfamily protein
AT4G11320	RDL5	-2.0176	3.43493e-05	0.00300667	Papain family cysteine protease
AT2G48080	AT2G48080	-2.02291	0.00450788	0.0497127	oxidoreductase, 2OG-Fe(II) oxygenase family protein
AT4G00680	ADF8	-2.02702	0.000204739	0.00831564	actin depolymerizing factor 8
AT3G47360	HSD3	-2.02923	0.00157245	0.0267001	hydroxysteroid dehydrogenase 3
AT5G47635	AT5G47635	-2.02984	0.00281668	0.0372089	Pollen Ole e 1 allergen and extensin family protein
AT1G05260	PER3	-2.03264	0.00213379	0.0315398	Peroxidase superfamily protein
AT1G15210	ABCG35	-2.03286	0.000999019	0.0207536	pleiotropic drug resistance 7
AT2G12646	AT2G12646	-2.03484	0.00323113	0.0407545	PLATZ transcription factor family protein
AT1G72490	AT1G72490	-2.03957	0.000843041	0.0187132
AT2G24610	ATCNGC14	-2.04537	0.000734893	0.0172686	cyclic nucleotide-gated channel 14
AT1G51830	AT1G51830	-2.04543	0.00279335	0.0371023	Leucine-rich repeat protein kinase family protein
AT5G15180	PER56	-2.04595	0.000173754	0.00754149	Peroxidase superfamily protein
AT3G44990	XTH31	-2.05143	0.000606656	0.0155668	xyloglucan endo-transglycosylase-related 8
AT2G01880	PAP7	-2.05614	0.00411465	0.0471942	purple acid phosphatase 7
AT5G26300	AT5G26300	-2.05704	0.00142878	0.0252959	TRAF-like family protein
AT4G12050	AHL26	-2.05823	0.000804088	0.0182527	Predicted AT-hook DNA-binding family protein
AT3G21510	AHP1	-2.06484	0.000249249	0.00921045	histidine-containing phosphotransmitter 1
AT5G63660	PDF2.5	-2.06495	0.0026641	0.035934	Scorpion toxin-like knottin superfamily protein
AT5G06839	TGA10	-2.07047	1.2346e-05	0.00195872	bZIP transcription factor family protein
AT3G02550	LBD41	-2.07496	8.73126e-06	0.00165601	LOB domain-containing protein 41
AT4G11780	AT4G11780	-2.0769	0.00274115	0.0366648
AT3G44550	FAR5	-2.07913	5.52441e-06	0.00136304	fatty acid reductase 5
AT1G18100	MFT	-2.08034	0.00329089	0.0411682	PEBP (phosphatidylethanolamine-binding protein) family protein
AT3G62040	AT3G62040	-2.08363	0.000878294	0.0191749	Haloacid dehalogenase-like hydrolase (HAD) superfamily protein
AT5G14690	AT5G14690	-2.0837	0.00084284	0.0187132
AT2G17850	AT2G17850	-2.08576	0.00170165	0.0277904	Rhodanese/Cell cycle control phosphatase superfamily protein
AT2G48130	AT2G48130	-2.0985	0.000922656	0.019866	Bifunctional inhibitor/lipid-transfer protein/seed storage 2S albumin superfamily protein
AT4G22235	AT4G22235	-2.09893	7.11686e-05	0.00444977	Arabidopsis defensin-like protein
AT2G21045	HAC1	-2.10905	0.000827188	0.0185201	Rhodanese/Cell cycle control phosphatase superfamily protein
AT3G50400	AT3G50400	-2.11529	0.000168261	0.00740942	GDSL-like Lipase/Acylhydrolase superfamily protein
AT5G01060	AT5G01060	-2.11531	0.000183465	0.00777491	Protein kinase protein with tetratricopeptide repeat domain
AT4G29270	AT4G29270	-2.1161	1.64726e-06	0.000697052	HAD superfamily, subfamily IIIB acid phosphatase
AT4G29180	RHS16	-2.121	0.000475168	0.0135115	root hair specific 16
AT1G67150	AT1G67150	-2.12906	0.000137863	0.00663684	Plant protein of unknown function (DUF247)
AT5G41040	HHT1	-2.13042	0.00050033	0.0138823	HXXXD-type acyl-transferase family protein
AT2G48140	EDA4	-2.13115	8.0554e-06	0.00161486	Bifunctional inhibitor/lipid-transfer protein/seed storage 2S albumin superfamily protein
AT3G12820	AtMYB10	-2.13339	0.00240573	0.0339372	myb domain protein 10
AT2G43590	AT2G43590	-2.14643	0.00238605	0.0338349	Chitinase family protein
AT3G44540	FAR4	-2.14717	0.0031073	0.039717	fatty acid reductase 4
AT4G26220	AT4G26220	-2.15381	0.000245934	0.00913002	S-adenosyl-L-methionine-dependent methyltransferases superfamily protein
AT5G17820	AT5G17820	-2.16139	0.00231615	0.0332231	Peroxidase superfamily protein
AT2G40370	LAC5	-2.16647	6.19536e-06	0.00145145	laccase 5
AT4G11290	PER39	-2.1705	1.30825e-05	0.00195872	Peroxidase superfamily protein
AT5G58860	CYP86A1	-2.17167	0.00366529	0.0438743	cytochrome P450, family 86, subfamily A, polypeptide 1
AT2G01530	MLP329	-2.1765	0.000534729	0.0143444	MLP-like protein 329
AT2G47460	MYB12	-2.17992	0.000871982	0.0191083	myb domain protein 12
AT5G66985	AT5G66985	-2.18007	0.000455035	0.0131252
AT1G59780	AT1G59780	-2.18115	0.00355628	0.0431421	NB-ARC domain-containing disease resistance protein
AT1G78090	TPPB	-2.18168	4.72745e-06	0.00119396	trehalose-6-phosphate phosphatase
AT4G35160	ASMT	-2.18178	0.000237006	0.00894055	O-methyltransferase family protein
AT3G59370	AT3G59370	-2.18976	0.00435012	0.0486408	Vacuolar calcium-binding protein-related
AT5G42500	DIR2	-2.19203	0.00245911	0.0343986	Disease resistance-responsive (dirigent-like protein) family protein
AT2G14820	NPY2	-2.19233	0.00383237	0.0450433	Phototropic-responsive NPH3 family protein
AT5G20790	AT5G20790	-2.1933	0.000911582	0.0196896
AT1G73270	SCPL6	-2.1942	0.000418551	0.0123961	serine carboxypeptidase-like 6
AT1G68850	PER11	-2.19471	0.000332524	0.0108062	Peroxidase superfamily protein
AT2G47540	AT2G47540	-2.20537	0.000163321	0.00728586	Pollen Ole e 1 allergen and extensin family protein
AT5G48940	RCH1	-2.21062	0.00189963	0.0297067	Leucine-rich repeat transmembrane protein kinase family protein
AT5G42630	KAN4	-2.21218	0.00187369	0.0295378	Homeodomain-like superfamily protein
AT4G29690	AT4G29690	-2.21499	0.0022893	0.0329279	Alkaline-phosphatase-like family protein
AT3G60490	ERF035	-2.21546	0.00228033	0.0328431	Integrase-type DNA-binding superfamily protein
AT1G56630	AT1G56630	-2.24014	0.00150985	0.0260103	alpha/beta-Hydrolases superfamily protein
AT5G20150	SPX1	-2.24014	0.000409687	0.0122575	SPX domain gene 1
AT2G23050	NPY4	-2.24463	0.00356344	0.0431637	Phototropic-responsive NPH3 family protein
AT2G29750	UGT71C1	-2.24497	0.000259934	0.00944209	UDP-glucosyl transferase 71C1
AT5G38030	DTX30	-2.24513	0.00152725	0.02622	MATE efflux family protein
AT5G19410	AT5G19410	-2.24614	3.32123e-05	0.00296737	ABC-2 type transporter family protein
AT2G05440	ATGRP9	-2.25222	5.66923e-05	0.0038938	GLYCINE RICH PROTEIN 9
AT2G25810	TIP4-1	-2.2558	7.44097e-05	0.00458098	tonoplast intrinsic protein 4;1
AT1G77530	AT1G77530	-2.25947	0.00212451	0.0314692	O-methyltransferase family protein
AT5G09520	PELPK2	-2.27451	3.93182e-05	0.00321624	hydroxyproline-rich glycoprotein family protein
AT1G49860	GSTF14	-2.27485	0.00101095	0.0209093	glutathione S-transferase (class phi) 14
AT1G73330	ATDR4	-2.27627	0.0010282	0.0211005	drought-repressed 4
AT1G01580	FRO2	-2.27693	0.00056953	0.0149612	ferric reduction oxidase 2
AT4G29800	PLP8	-2.2773	0.000630438	0.0159348	PATATIN-like protein 8
AT1G74500	PRE3	-2.27889	0.00385874	0.0452373	activation-tagged BRI1(brassinosteroid-insensitive 1)-suppressor 1
AT4G21200	GA2OX8	-2.27999	0.001376	0.0247672	gibberellin 2-oxidase 8
AT5G38020	AT5G38020	-2.28379	0.000229113	0.00880095	S-adenosyl-L-methionine-dependent methyltransferases superfamily protein
AT4G19030	NIP1-1	-2.29546	0.000555756	0.0147078	NOD26-like major intrinsic protein 1
AT4G33790	FAR3	-2.29878	0.0044634	0.0494395	Jojoba acyl CoA reductase-related male sterility protein
AT3G60280	UCC3	-2.30177	0.00233376	0.0333652	uclacyanin 3
AT5G10720	AHK5	-2.30234	0.00335958	0.0416861	histidine kinase 5
AT3G01190	PER27	-2.30246	0.000156689	0.00713893	Peroxidase superfamily protein
AT1G73600	AT1G73600	-2.31032	0.000242263	0.00904608	S-adenosyl-L-methionine-dependent methyltransferases superfamily protein
AT3G62740	BGLU7	-2.31253	3.77808e-06	0.00103574	beta glucosidase 7
AT2G30210	LAC3	-2.31963	8.84678e-06	0.00165601	laccase 3
AT2G25980	JAL20	-2.31986	0.00106569	0.0215124	Mannose-binding lectin superfamily protein
AT4G37410	CYP81F4	-2.33352	3.53226e-08	0.000113297	cytochrome P450, family 81, subfamily F, polypeptide 4
AT1G56320	AT1G56320	-2.33391	0.000145748	0.00685466
AT5G10230	ANNAT7	-2.34195	2.97725e-05	0.00281549	annexin 7
AT4G13280	TPS12	-2.34932	5.86861e-05	0.00396285	terpenoid synthase 12
AT1G07560	AT1G07560	-2.35836	0.000170638	0.00745672	Leucine-rich repeat protein kinase family protein
AT5G58750	AT5G58750	-2.36065	0.00188756	0.0296223	NAD(P)-binding Rossmann-fold superfamily protein
AT1G49210	ATL76	-2.36471	0.000566421	0.0148918	RING/U-box superfamily protein
AT3G50230	AT3G50230	-2.36826	0.00146524	0.0255927	Leucine-rich repeat protein kinase family protein
AT3G24240	RCH2	-2.37121	0.00039677	0.0120287	Leucine-rich repeat receptor-like protein kinase family protein
AT2G03720	MRH6	-2.37314	0.00154911	0.0264579	Adenine nucleotide alpha hydrolases-like superfamily protein
AT5G07475	AT5G07475	-2.37748	0.000149847	0.00696815	Cupredoxin superfamily protein
AT3G54770	ARP1	-2.3812	0.000371135	0.011535	RNA-binding (RRM/RBD/RNP motifs) family protein
AT4G12170	AT4G12170	-2.38278	0.00148286	0.0257968	Thioredoxin superfamily protein
AT2G30340	LBD13	-2.39106	0.000265597	0.00955755	LOB domain-containing protein 13
AT5G38010	UGT76E9	-2.39609	1.09051e-05	0.00182079	UDP-Glycosyltransferase superfamily protein
AT5G38000	AT5G38000	-2.40141	1.09559e-05	0.00182079	Zinc-binding dehydrogenase family protein
AT3G23800	SBP3	-2.40214	0.000508931	0.0139566	selenium-binding protein 3
AT3G14940	PPC3	-2.41056	0.000155624	0.00710999	phosphoenolpyruvate carboxylase 3
AT5G51060	RBOHC	-2.41389	0.000692795	0.0166185	NADPH/respiratory burst oxidase protein D
AT3G15240	AT3G15240	-2.42463	0.00192677	0.0299106	Serine/threonine-protein kinase WNK (With No Lysine)-related
AT5G13580	ABCG6	-2.4318	0.000281929	0.00986614	ABC-2 type transporter family protein
AT2G14920	SOT10	-2.43197	0.00307669	0.0394897	sulfotransferase 4A
AT1G77120	ADH1	-2.46134	0.00136354	0.0246954	alcohol dehydrogenase 1
AT1G14160	AT1G14160	-2.46885	0.0020495	0.0309791	Uncharacterised protein family (UPF0497)
AT3G50300	AT3G50300	-2.47532	0.000176335	0.00760939	HXXXD-type acyl-transferase family protein
AT2G04680	AT2G04680	-2.48327	0.00162483	0.0271608	Cysteine/Histidine-rich C1 domain family protein
AT2G44110	MLO15	-2.48419	0.00195615	0.0302232	Seven transmembrane MLO family protein
AT1G23720	AT1G23720	-2.48767	0.00140952	0.0250889	Proline-rich extensin-like family protein
AT5G24960	CYP71A14	-2.49	0.000679485	0.016478	cytochrome P450, family 71, subfamily A, polypeptide 14
AT4G19690	IRT1	-2.49383	0.000940138	0.0199967	iron-regulated transporter 1
AT3G11430	GPAT5	-2.49714	1.36821e-05	0.00198333	glycerol-3-phosphate acyltransferase 5
AT1G05700	AT1G05700	-2.49992	6.75069e-06	0.0014933	Leucine-rich repeat transmembrane protein kinase protein
AT1G14240	APY3	-2.50214	3.68269e-06	0.0010183	GDA1/CD39 nucleoside phosphatase family protein
AT1G51840	AT1G51840	-2.51423	0.000291536	0.0100657	protein kinase-related
AT5G62165	AGL42	-2.51667	0.000288652	0.0100135	AGAMOUS-like 42
AT4G15160	AT4G15160	-2.51862	0.000351461	0.0111615	Bifunctional inhibitor/lipid-transfer protein/seed storage 2S albumin superfamily protein
AT1G23410	RPS27AA	-2.51913	0.00274566	0.0366794	Ribosomal protein S27a / Ubiquitin family protein
AT4G25310	AT4G25310	-2.52223	0.00112853	0.0221352	2-oxoglutarate (2OG) and Fe(II)-dependent oxygenase superfamily protein
AT3G20380	AT3G20380	-2.52446	7.98477e-05	0.0047516	TRAF-like family protein
AT1G54970	PRP1	-2.55582	0.00373583	0.0444297	proline-rich protein 1
AT1G05240	PER2	-2.55606	0.00454787	0.049987	Peroxidase superfamily protein
AT1G16440	RHS3	-2.55783	0.00183575	0.029217	root hair specific 3
AT1G74460	AT1G74460	-2.55955	2.42839e-05	0.00256047	GDSL-like Lipase/Acylhydrolase superfamily protein
AT2G43880	AT2G43880	-2.56297	0.00439327	0.0489455	Pectin lyase-like superfamily protein
AT2G42660	AT2G42660	-2.56599	0.00155438	0.0264913	Homeodomain-like superfamily protein
AT5G58910	LAC16	-2.57016	0.000537871	0.014358	laccase 16
AT2G19590	ACO1	-2.58177	3.11254e-05	0.00286059	ACC oxidase 1
AT5G49350	AT5G49350	-2.58492	0.000300012	0.0101829	Glycine-rich protein family
AT5G51720	NEET	-2.59507	9.09027e-05	0.00516054	2 iron, 2 sulfur cluster binding
AT2G01520	MLP328	-2.6312	0.0029002	0.0379534	MLP-like protein 328
AT4G12280	AT4G12280	-2.64026	3.25518e-06	0.000966759	copper amine oxidase family protein
AT1G70450	AT1G70450	-2.65517	0.000698344	0.0166911	Protein kinase superfamily protein
AT1G48500	TIFY6A	-2.65668	3.02513e-05	0.00282067	jasmonate-zim-domain protein 4
AT4G20240	CYP71A27	-2.66354	7.09742e-05	0.00444629	cytochrome P450, family 71, subfamily A, polypeptide 27
AT1G26250	AT1G26250	-2.66535	0.000111574	0.00590887	Proline-rich extensin-like family protein
AT3G27884	AT3G27884	-2.66997	0.00121657	0.0230624	other RNA
AT5G19520	MSL9	-2.69553	0.000262144	0.00949016	mechanosensitive channel of small conductance-like 9
AT5G37990	AT5G37990	-2.69786	0.00312071	0.0397999	S-adenosyl-L-methionine-dependent methyltransferases superfamily protein
AT3G61410	AT3G61410	-2.69875	0.000181583	0.00775534
AT2G30130	LBD12	-2.70611	0.000755167	0.0175789	Lateral organ boundaries (LOB) domain family protein
AT4G31320	AT4G31320	-2.71926	0.00270459	0.0363143	SAUR-like auxin-responsive protein family
AT1G33750	TPS22	-2.72089	0.00388081	0.0453798	Terpenoid cyclases/Protein prenyltransferases superfamily protein
AT1G12740	CYP87A2	-2.72522	0.000175267	0.00758661	cytochrome P450, family 87, subfamily A, polypeptide 2
AT3G45070	AT3G45070	-2.73185	0.000234877	0.00893057	P-loop containing nucleoside triphosphate hydrolases superfamily protein
AT4G15290	CSLB5	-2.73353	0.0038023	0.0449212	Cellulose synthase family protein
AT1G78990	AT1G78990	-2.77194	1.8148e-05	0.00224748	HXXXD-type acyl-transferase family protein
AT4G08400	AT4G08400	-2.7723	0.0017722	0.0285939	Proline-rich extensin-like family protein
AT2G02630	AT2G02630	-2.77375	0.00207534	0.0311642	Cysteine/Histidine-rich C1 domain family protein
AT3G24300	AMT1-3	-2.78005	0.000181158	0.00774752	ammonium transporter 1;3
AT2G18620	AT2G18620	-2.80558	0.00431496	0.0484858	Terpenoid synthases superfamily protein
AT3G57157	AT3G57157	-2.81908	5.57715e-05	0.0038938	other RNA
AT5G36180	SCPL1	-2.82395	0.000227051	0.00876372	serine carboxypeptidase-like 1
AT1G31950	AT1G31950	-2.82645	0.00326053	0.0409488	Terpenoid cyclases/Protein prenyltransferases superfamily protein
AT3G46270	AT3G46270	-2.85172	0.000223115	0.00867347	receptor protein kinase-related
AT1G19900	AT1G19900	-2.8604	0.000934147	0.0199353	glyoxal oxidase-related protein
AT3G13784	CWINV5	-2.86602	0.0022768	0.0328203	cell wall invertase 5
AT4G22610	AT4G22610	-2.86821	0.0023225	0.0332861	Bifunctional inhibitor/lipid-transfer protein/seed storage 2S albumin superfamily protein
AT4G19820	AT4G19820	-2.89701	0.00280966	0.0372089	Glycosyl hydrolase family protein with chitinase insertion domain
AT1G78815	LSH7	-2.91041	7.59814e-05	0.00463328	Protein of unknown function (DUF640)
AT4G14060	AT4G14060	-2.91443	8.26925e-05	0.00483126	Polyketide cyclase/dehydrase and lipid transport superfamily protein
AT5G10040	AT5G10040	-2.92053	0.00435553	0.0486434
AT1G12010	AT1G12010	-2.96244	1.28841e-05	0.00195872	2-oxoglutarate (2OG) and Fe(II)-dependent oxygenase superfamily protein
AT4G12270	AT4G12270	-2.96859	0.000391596	0.0119509	Copper amine oxidase family protein
AT1G80340	GA3OX2	-3.00172	0.000980679	0.02055	gibberellin 3-oxidase 2
AT3G61680	PLIP1	-3.01789	9.80078e-05	0.00542	alpha/beta-Hydrolases superfamily protein
AT4G31940	CYP82C4	-3.01857	0.00323343	0.0407554	cytochrome P450, family 82, subfamily C, polypeptide 4
AT5G42785	AT5G42785	-3.08424	0.000373483	0.0115587
AT4G11880	AGL14	-3.12343	1.63099e-05	0.00210943	AGAMOUS-like 14
AT3G01260	AT3G01260	-3.12635	0.000151868	0.00699879	Galactose mutarotase-like superfamily protein
AT4G11610	AT4G11610	-3.15612	0.00146543	0.0255927	C2 calcium/lipid-binding plant phosphoribosyltransferase family protein
AT5G46900	AT5G46900	-3.27773	0.000437829	0.0127713	Bifunctional inhibitor/lipid-transfer protein/seed storage 2S albumin superfamily protein
AT3G09160	AT3G09160	-3.39491	0.00209875	0.0313688	RNA-binding (RRM/RBD/RNP motifs) family protein
AT5G37950	AT5G37950	-3.42221	0.00364222	0.0437708	UDP-Glycosyltransferase superfamily protein
AT4G01630	EXPA17	-3.42325	0.000135677	0.00660726	expansin A17
AT5G14650	AT5G14650	-3.42398	0.000153577	0.0070573	Pectin lyase-like superfamily protein
AT1G77520	AT1G77520	-3.55363	0.000400428	0.0120663	O-methyltransferase family protein
AT3G46880	AT3G46880	-3.68259	0.00392176	0.0456668
AT5G26310	UGT72E3	-3.78061	0.00133601	0.0243764	UDP-Glycosyltransferase superfamily protein
AT3G54310	AT3G54310	-4.05287	0.0020266	0.0307926
AT5G51500	PME60	-4.30989	0.00092345	0.019866	Plant invertase/pectin methylesterase inhibitor superfamily
AT5G52170	HDG7	-4.36423	0.00247869	0.034552	homeodomain GLABROUS 7
AT2G22590	UGT91A1	-4.57578	0.00158602	0.0268168	UDP-Glycosyltransferase superfamily protein
AT4G01970	AtSTS	-5.89797	0.00347748	0.0426449	stachyose synthase
AT5G37210	AT5G37210	-7.0255	0.000309322	0.0103457	Cysteine/Histidine-rich C1 domain family protein
AT3G01202	AT3G01202	-7.37149	0.000691059	0.0166115	other RNA
AT4G26330	UNE17	-7.41582	0.00282069	0.037232	Subtilisin-like serine endopeptidase family protein
AT4G00210	LBD31	-7.51241	0.00136706	0.0247155	LOB domain-containing protein 31
AT5G37820	NIP4	-7.71905	9.57668e-05	0.00533724	NOD26-like intrinsic protein 4;2
AT5G09978	PEP7	-8.22546	0.00364642	0.0438011	elicitor peptide 7 precursor
AT3G58060	MTPC3	-8.25619	0.000162826	0.00727386	Cation efflux family protein
AT4G19770	AT4G19770	-8.3789	0.00121833	0.0230809	Glycosyl hydrolase family protein with chitinase insertion domain
AT1G05660	AT1G05660	-8.48732	0.000175208	0.00758661	Pectin lyase-like superfamily protein
AT1G33280	BRN1	-9.32734	8.42358e-05	0.00487029	NAC domain containing protein 15

## Sheet: VS-0
Gene	Symbol	log2FC	p-value	FDR	Description
AT3G60120	BGLU27	11.5983	0.00318612	0.0368902	beta glucosidase 27
AT1G35320	AT1G35320	10.4463	1.73159e-07	0.000142401
AT1G65483	AT1G65483	9.97302	1.10621e-06	0.00037712
AT3G25180	CYP82G1	9.75531	0.000529438	0.0127133	cytochrome P450, family 82, subfamily G, polypeptide 1
AT5G07310	ERF115	9.65132	8.83318e-05	0.0044618	Integrase-type DNA-binding superfamily protein
AT4G22467	AT4G22467	8.92719	0.000190872	0.00700276
AT2G19610	AT2G19610	8.72218	0.00180821	0.0258784	RING/U-box superfamily protein
AT1G02580	MEA	8.66988	0.000569249	0.0132977	SET domain-containing protein
AT2G01280	MEE65	8.61722	0.00407672	0.0428443	Cyclin/Brf1-like TBP-binding protein
AT5G49420	AT5G49420	8.52033	7.45339e-05	0.00409362	MADS-box transcription factor family protein
AT1G72840	AT1G72840	8.3683	6.32937e-07	0.000285497	Disease resistance protein (TIR-NBS-LRR class)
AT3G13433	AT3G13433	8.29907	0.00149229	0.0231397
AT3G47030	AT3G47030	8.19359	0.0042738	0.0440778	F-box and associated interaction domains-containing protein
AT1G20400	AT1G20400	8.13782	0.000621651	0.0140024	Protein of unknown function (DUF1204)
AT5G09876	AT5G09876	8.11625	0.000429962	0.0111914
AT5G64790	AT5G64790	8.01306	0.000458933	0.0116735	O-Glycosyl hydrolases family 17 protein
AT4G35170	AT4G35170	7.76542	0.00147278	0.0230103	Late embryogenesis abundant (LEA) hydroxyproline-rich glycoprotein family
AT1G75600	AT1G75600	7.68639	0.00344824	0.0387545	Histone superfamily protein
AT2G27650	AT2G27650	7.64425	0.00376442	0.04083	Ubiquitin carboxyl-terminal hydrolase-related protein
AT2G25510	AT2G25510	7.55314	0.00497813	0.0487553
AT4G34210	ASK11	7.16355	0.00436839	0.044737	SKP1-like 11
AT2G14610	PR1	7.09183	2.38824e-07	0.000162985	pathogenesis-related gene 1
AT3G47250	AT3G47250	6.94654	3.3778e-11	1.08343e-06	Plant protein of unknown function (DUF247)
AT1G09995	AT1G09995	6.93766	0.00139043	0.0223999	DNA repair DEAD helicase RAD3/XP-D subfamily protein
AT3G54363	AT3G54363	6.83479	8.65805e-05	0.00441027
AT3G47290	ATPLC8	6.79355	0.000266266	0.00834032	phosphatidylinositol-speciwc phospholipase C8
AT3G48580	XTH11	6.47526	1.78831e-06	0.000482988	xyloglucan endotransglucosylase/hydrolase 11
AT1G03106	AT1G03106	6.00903	0.000538391	0.0128393
AT2G44240	AT2G44240	5.99808	8.55085e-06	0.00118731	Protein of Unknown Function (DUF239)
AT1G72852	AT1G72852	5.91815	0.000149837	0.00597765
AT5G57550	XTH25	5.88886	2.47147e-08	5.28484e-05	xyloglucan endotransglucosylase/hydrolase 25
AT5G03204	AT5G03204	5.84165	0.00420588	0.0437087
AT3G13130	AT3G13130	5.67892	1.73307e-05	0.00171568
AT2G38240	ANS	5.34143	9.50275e-06	0.00123067	2-oxoglutarate (2OG) and Fe(II)-dependent oxygenase superfamily protein
AT3G44430	AT3G44430	5.26407	1.8234e-05	0.00177768
AT2G25440	AtRLP20	5.21003	0.00010943	0.00508692	receptor like protein 20
AT2G36760	UGT73C2	5.13036	0.0030732	0.0360941	UDP-glucosyl transferase 73C2
AT4G22470	AT4G22470	5.11878	0.000714488	0.0150474	protease inhibitor/seed storage/lipid transfer protein (LTP) family protein
AT3G60966	AT3G60966	5.07482	1.07759e-07	0.000115213	RING/U-box superfamily protein
AT4G17660	PBL20	5.06174	0.0007078	0.014936	Protein kinase superfamily protein
AT5G61890	ERF114	5.04594	0.000100675	0.00484132	Integrase-type DNA-binding superfamily protein
AT1G04580	AAO4	4.96996	6.90569e-05	0.00391343	aldehyde oxidase 4
AT5G55150	AT5G55150	4.95316	0.00284755	0.0344791	Protein of unknown function (DUF295)
AT4G37990	CAD8	4.94314	6.79537e-05	0.00388523	elicitor-activated gene 3-2
AT2G29470	GSTU3	4.86933	0.000199097	0.00718257	glutathione S-transferase tau 3
AT5G22520	AT5G22520	4.78128	0.00130087	0.0215867
AT5G22545	AT5G22545	4.69432	0.00214242	0.0288108
AT5G01900	WRKY62	4.6503	1.4066e-05	0.00151216	WRKY DNA-binding protein 62
AT4G04510	CRK38	4.54972	5.95587e-07	0.000272907	cysteine-rich RLK (RECEPTOR-like protein kinase) 38
AT2G39030	NATA1	4.54371	0.00340929	0.0384576	Acyl-CoA N-acyltransferases (NAT) superfamily protein
AT1G61800	GPT2	4.52673	0.000811732	0.0163562	glucose-6-phosphate/phosphate translocator 2
AT1G28650	AT1G28650	4.50741	0.00295516	0.0351831	GDSL-like Lipase/Acylhydrolase superfamily protein
AT5G09470	PUMP6	4.4885	6.30496e-06	0.000976964	dicarboxylate carrier 3
AT1G72855	AT1G72855	4.47836	7.3732e-06	0.00107989	other RNA
AT5G53870	ENODL1	4.45349	1.01167e-06	0.000372078	early nodulin-like protein 1
AT5G05340	PER52	4.45241	0.000173296	0.0065703	Peroxidase superfamily protein
AT2G35070	AT2G35070	4.42032	4.72481e-06	0.000834683
AT5G58840	SBT4.9	4.38663	0.000121499	0.00535017	Subtilase family protein
AT2G20800	NDB4	4.38201	0.00353389	0.0392904	NAD(P)H dehydrogenase B4
AT4G21840	MSRB8	4.35312	3.21766e-06	0.000669638	methionine sulfoxide reductase B8
AT5G39520	AT5G39520	4.33187	6.99734e-05	0.00395026	Protein of unknown function (DUF1997)
AT3G28580	AT3G28580	4.30108	0.000893082	0.0172916	P-loop containing nucleoside triphosphate hydrolases superfamily protein
AT2G42170	AT2G42170	4.30106	8.93491e-08	0.000110025	Actin family protein
AT1G09080	MED37B	4.22852	5.67785e-08	8.27804e-05	Heat shock protein 70 (Hsp 70) family protein
AT4G36950	MAPKKK21	4.1905	0.00135747	0.0221132	mitogen-activated protein kinase kinase kinase 21
AT4G15270	AT4G15270	4.14596	0.000123457	0.00538134	glucosyltransferase-related
AT1G65360	AGL23	4.1381	0.00365366	0.0400107	AGAMOUS-like 23
AT4G00130	AT4G00130	4.12316	0.00233842	0.0303173	DNA-binding storekeeper protein-related transcriptional regulator
AT4G21830	MSRB7	4.11308	2.03555e-06	0.000509059	methionine sulfoxide reductase B7
AT1G69930	GSTU11	4.10741	0.000993566	0.0183999	glutathione S-transferase TAU 11
AT3G47480	CML47	4.08693	6.95934e-06	0.00103824	Calcium-binding EF-hand family protein
AT4G21680	NPF7.2	4.05446	0.000482125	0.0119784	NITRATE TRANSPORTER 1.8
AT5G63750	ARI13	4.04337	0.00150888	0.023268	RING/U-box superfamily protein
AT4G12480	EARLI1	3.99265	8.74653e-05	0.00443199	Bifunctional inhibitor/lipid-transfer protein/seed storage 2S albumin superfamily protein
AT1G16420	AMC8	3.97036	9.00491e-07	0.000347991	metacaspase 8
AT5G36907	AT5G36907	3.96563	3.28969e-06	0.000674404
AT5G59590	UGT76E2	3.92117	0.000138986	0.0057374	UDP-glucosyl transferase 76E2
AT3G19615	AT3G19615	3.90545	0.00207884	0.0282418
AT5G27060	AtRLP53	3.90333	1.29892e-05	0.00144663	receptor like protein 53
AT4G04490	CRK36	3.89251	0.000144651	0.00587302	cysteine-rich RLK (RECEPTOR-like protein kinase) 36
AT5G25260	FLOT2	3.88838	3.0347e-08	5.40767e-05	SPFH/Band 7/PHB domain-containing membrane-associated protein family
AT3G18250	AT3G18250	3.88389	4.43738e-05	0.00304773	Putative membrane lipoprotein
AT1G33950	IAN7	3.85604	0.0033658	0.0381302	Avirulence induced gene (AIG1) family protein
AT2G43510	ATTI1	3.84554	3.20141e-07	0.000199888	trypsin inhibitor protein 1
AT3G44300	NIT2	3.82567	0.00028296	0.0085703	nitrilase 2
AT2G45570	CYP76C2	3.80667	0.00356386	0.0394503	cytochrome P450, family 76, subfamily C, polypeptide 2
AT5G14180	LIP2	3.80043	1.72663e-06	0.000477429	Myzus persicae-induced lipase 1
AT1G80130	AT1G80130	3.79964	0.00130314	0.0216123	Tetratricopeptide repeat (TPR)-like superfamily protein
AT2G24850	TAT3	3.79806	0.000664736	0.0144945	tyrosine aminotransferase 3
AT3G57260	BGL2	3.79706	1.965e-06	0.000509059	beta-1,3-glucanase 2
AT3G55970	JRG21	3.79683	0.00195769	0.0272185	jasmonate-regulated gene 21
AT5G03495	AT5G03495	3.79292	0.000178678	0.00670561	RNA-binding (RRM/RBD/RNP motifs) family protein
AT4G12490	AT4G12490	3.78692	1.15588e-05	0.00137315	Bifunctional inhibitor/lipid-transfer protein/seed storage 2S albumin superfamily protein
AT4G25810	XTH23	3.77492	2.45056e-06	0.000583236	xyloglucan endotransglycosylase 6
AT3G54150	AT3G54150	3.70603	3.93809e-05	0.00283081	S-adenosyl-L-methionine-dependent methyltransferases superfamily protein
AT3G26830	CYP71B15	3.68939	0.00182274	0.0259726	Cytochrome P450 superfamily protein
AT1G44130	AT1G44130	3.68689	0.00151458	0.0233446	Eukaryotic aspartyl protease family protein
AT4G11170	AT4G11170	3.67739	4.8788e-05	0.00318064	Disease resistance protein (TIR-NBS-LRR class) family
AT5G52720	AT5G52720	3.67501	2.00307e-05	0.00188422	Copper transport protein family
AT5G13170	SWEET15	3.66392	5.03328e-05	0.00321598	senescence-associated gene 29
AT4G35180	LHT7	3.64082	0.000108127	0.00506079	LYS/HIS transporter 7
AT1G55230	AT1G55230	3.63015	0.000375663	0.0103074	Family of unknown function (DUF716)
AT1G45616	AtRLP6	3.62629	0.00411785	0.0431659	receptor like protein 6
AT1G76930	ATEXT4	3.62442	4.25838e-07	0.000230753	extensin 4
AT1G69920	GSTU12	3.62068	6.62159e-05	0.00382642	glutathione S-transferase TAU 12
AT1G30135	TIFY5A	3.61394	0.0001518	0.00602828	jasmonate-zim-domain protein 8
AT5G56795	MT1B	3.60755	0.000626311	0.014058	metallothionein 1B
AT3G23250	MYB15	3.59274	9.3626e-07	0.000353301	myb domain protein 15
AT4G29570	CDA8	3.53088	2.6526e-05	0.00221568	Cytidine/deoxycytidylate deaminase family protein
AT1G65481	AT1G65481	3.50964	4.459e-06	0.000799008
AT1G35230	AGP5	3.4904	4.15534e-06	0.000765992	arabinogalactan protein 5
AT4G10860	AT4G10860	3.48174	0.000358848	0.0099889
AT5G26690	HIPP02	3.47231	5.70466e-06	0.000910333	Heavy metal transport/detoxification superfamily protein
AT5G53230	AT5G53230	3.45228	0.000447285	0.0114865	Protein of unknown function (DUF295)
AT4G12500	AT4G12500	3.42002	3.50313e-06	0.000680987	Bifunctional inhibitor/lipid-transfer protein/seed storage 2S albumin superfamily protein
AT5G11920	CWINV6	3.36875	1.92516e-07	0.000142401	6-&1-fructan exohydrolase
AT2G29110	ATGLR2.8	3.3646	0.00360624	0.0397765	glutamate receptor 2.8
AT5G11210	GLR2.5	3.3594	6.3434e-06	0.000978196	glutamate receptor 2.5
AT3G63380	ACA12	3.33462	1.19449e-09	1.45982e-05	ATPase E1-E2 type family protein / haloacid dehalogenase-like hydrolase family protein
AT1G32960	SBT3.3	3.32252	9.87683e-06	0.00125714	Subtilase family protein
AT1G79680	WAKL10	3.32089	2.45764e-06	0.000583236	WALL ASSOCIATED KINASE (WAK)-LIKE 10
AT1G14880	PCR1	3.31648	0.000946268	0.0178854	PLANT CADMIUM RESISTANCE 1
AT1G13470	AT1G13470	3.31304	0.000823813	0.0165459	Protein of unknown function (DUF1262)
AT4G23280	CRK20	3.30474	0.00406324	0.0427446	cysteine-rich RLK (RECEPTOR-like protein kinase) 20
AT2G29120	GLR2.7	3.26775	1.40797e-06	0.000414649	glutamate receptor 2.7
AT1G52890	NAC019	3.24272	0.00082898	0.0165874	NAC domain containing protein 19
AT1G51780	ILL5	3.23917	0.00383176	0.0413122	IAA-leucine resistant (ILR)-like gene 5
AT3G50770	CML41	3.22946	4.3446e-06	0.000789848	calmodulin-like 41
AT5G22530	AT5G22530	3.21912	0.00316623	0.0367427
AT5G39030	AT5G39030	3.20623	6.19632e-05	0.00366996	Protein kinase superfamily protein
AT5G13320	PBS3	3.20445	0.000884611	0.0171859	Auxin-responsive GH3 family protein
AT1G61610	AT1G61610	3.20042	1.67894e-05	0.00170159	S-locus lectin protein kinase family protein
AT3G22910	ACA13	3.20039	4.21461e-07	0.000230753	ATPase E1-E2 type family protein / haloacid dehalogenase-like hydrolase family protein
AT3G05660	AtRLP33	3.1483	6.52439e-07	0.000286671	receptor like protein 33
AT3G25882	NIMIN-2	3.14478	0.00330209	0.0377188	NIM1-interacting 2
AT3G61190	BAP1	3.14234	1.90409e-07	0.000142401	BON association protein 1
AT3G50930	HSR4	3.14044	4.10473e-05	0.00290682	cytochrome BC1 synthesis
AT1G17020	SRG1	3.12351	9.08935e-06	0.00121984	senescence-related gene 1
AT4G37530	PER51	3.0995	2.28555e-08	5.23636e-05	Peroxidase superfamily protein
AT1G43910	AT1G43910	3.09551	0.000137298	0.00568014	P-loop containing nucleoside triphosphate hydrolases superfamily protein
AT2G02580	CYP71B9	3.0924	0.00115006	0.0200927	cytochrome P450, family 71, subfamily B, polypeptide 9
AT3G50480	HR4	3.07926	7.53195e-06	0.00109315	homolog of RPW8 4
AT1G02930	GSTF6	3.07923	2.60567e-06	0.000593737	glutathione S-transferase 6
AT1G56650	MYB75	3.07494	0.000909169	0.0174966	production of anthocyanin pigment 1
AT5G64905	PEP3	3.06531	0.00149569	0.0231654	elicitor peptide 3 precursor
AT5G13080	WRKY75	3.06117	1.19993e-06	0.000388767	WRKY DNA-binding protein 75
AT1G21240	WAK3	3.05385	3.30106e-06	0.000674404	wall associated kinase 3
AT5G57510	AT5G57510	3.03673	0.000280561	0.00854677
AT2G04495	AT2G04495	3.03037	0.00162763	0.0243613
AT1G15790	AT1G15790	3.02875	1.98702e-07	0.000142401
AT1G73805	SARD1	3.01277	0.000311275	0.00909755	Calmodulin binding protein-like
AT4G11890	AT4G11890	3.00869	4.70463e-05	0.00312892	Protein kinase superfamily protein
AT3G10320	AT3G10320	3.00735	1.71221e-08	4.5766e-05	Glycosyltransferase family 61 protein
AT2G47190	ATMYB2	3.00039	7.67795e-05	0.00415295	myb domain protein 2
AT1G02770	AT1G02770	2.99106	0.000123649	0.00538134	Protein of unknown function (DUF626)
AT4G30430	TET9	2.98605	0.000338246	0.00966955	tetraspanin9
AT3G57700	AT3G57700	2.98565	1.14521e-05	0.00136553	Protein kinase superfamily protein
AT1G80160	AT1G80160	2.94962	0.00491488	0.0483276	Lactoylglutathione lyase / glyoxalase I family protein
AT1G62760	PMEI10	2.93245	0.000620856	0.0139944	Plant invertase/pectin methylesterase inhibitor superfamily protein
AT3G44860	FAMT	2.93224	2.04058e-08	5.03474e-05	farnesoic acid carboxyl-O-methyltransferase
AT4G23680	AT4G23680	2.9292	2.44148e-05	0.00211143	Polyketide cyclase/dehydrase and lipid transport superfamily protein
AT5G43650	BHLH92	2.92511	0.00162641	0.0243613	basic helix-loop-helix (bHLH) DNA-binding superfamily protein
AT1G01680	PUB54	2.92082	0.000310567	0.00909755	plant U-box 54
AT1G28480	GRXC9	2.90914	0.00363299	0.0398805	Thioredoxin superfamily protein
AT3G01080	WRKY58	2.90548	1.85705e-07	0.000142401	WRKY DNA-binding protein 58
AT1G19610	PDF1.4	2.9045	1.78196e-06	0.000482988	Arabidopsis defensin-like protein
AT4G28085	AT4G28085	2.89948	0.000232843	0.00777963
AT1G02920	GSTF7	2.89625	1.39658e-05	0.00150867	glutathione S-transferase 7
AT5G59390	AT5G59390	2.89503	0.00240087	0.030898	XH/XS domain-containing protein
AT1G79400	CHX2	2.89487	1.28848e-05	0.00144504	cation/H+ exchanger 2
AT3G28890	AtRLP43	2.88276	6.47179e-08	8.64928e-05	receptor like protein 43
AT1G26420	FOX5	2.87927	6.47632e-05	0.00377002	FAD-binding Berberine family protein
AT5G25250	FLOT1	2.87925	8.78747e-05	0.00444571	SPFH/Band 7/PHB domain-containing membrane-associated protein family
AT5G58680	AT5G58680	2.87802	0.00088027	0.0171537	ARM repeat superfamily protein
AT3G15536	AT3G15536	2.86816	0.000302926	0.0089469
AT3G09940	MDAR3	2.86089	0.000203495	0.00723627	monodehydroascorbate reductase
AT3G48850	MPT2	2.85057	0.000473705	0.0119263	phosphate transporter 3;2
AT5G39670	CML46	2.8434	4.25637e-06	0.000780132	Calcium-binding EF-hand family protein
AT5G56510	APUM12	2.84248	0.00232354	0.0301731	pumilio 12
AT5G38250	LRK10L-2.3	2.84192	3.41767e-05	0.00257057	Protein kinase family protein
AT4G18980	AtS40-3	2.84165	0.00139938	0.0224803	AtS40-3
AT2G40435	AT2G40435	2.84006	2.39159e-05	0.00210165
AT3G46090	ZAT7	2.83392	1.58562e-06	0.000450077	C2H2 and C2HC zinc fingers superfamily protein
AT1G57650	AT1G57650	2.83362	0.00464404	0.0464477	ATP binding
AT2G23970	GGP5	2.82399	0.00317892	0.0368633	Class I glutamine amidotransferase-like superfamily protein
AT5G42380	CML37	2.81693	5.56614e-05	0.00343334	calmodulin like 37
AT2G42360	ATL41	2.81205	5.00721e-05	0.00321102	RING/U-box superfamily protein
AT2G01008	AT2G01008	2.80512	0.000283542	0.00857982
AT3G46280	AT3G46280	2.80009	4.00763e-06	0.000756145	protein kinase-related
AT1G75750	GASA1	2.79721	4.99402e-06	0.000851063	GAST1 protein homolog 1
AT1G68290	ENDO2	2.79099	2.14805e-05	0.00197098	endonuclease 2
AT1G51890	AT1G51890	2.78758	4.07522e-07	0.00022932	Leucine-rich repeat protein kinase family protein
AT4G04710	CPK22	2.78327	0.000439849	0.0113627	calcium-dependent protein kinase 22
AT1G73260	KTI1	2.7674	0.000217576	0.00753644	kunitz trypsin inhibitor 1
AT3G50940	AT3G50940	2.766	0.000343611	0.00977069	P-loop containing nucleoside triphosphate hydrolases superfamily protein
AT1G47510	IP5P11	2.74395	0.000263018	0.0082898	inositol polyphosphate 5-phosphatase 11
AT5G39580	PER62	2.74136	8.66937e-05	0.00441027	Peroxidase superfamily protein
AT1G35210	AT1G35210	2.73795	1.68299e-05	0.00170159
AT2G43570	CHI	2.73782	0.00513506	0.0497604	chitinase, putative
AT1G14520	MIOX1	2.73283	4.39525e-08	7.04888e-05	myo-inositol oxygenase 1
AT4G12470	AZI1	2.73131	0.000708411	0.0149391	azelaic acid induced 1
AT2G25450	GSL-OH	2.73102	7.04156e-05	0.00395382	2-oxoglutarate (2OG) and Fe(II)-dependent oxygenase superfamily protein
AT2G20142	AT2G20142	2.73021	0.000280263	0.00854677	Toll-Interleukin-Resistance (TIR) domain family protein
AT1G66090	AT1G66090	2.71662	0.000125118	0.00539945	Disease resistance protein (TIR-NBS class)
AT4G37520	PER50	2.6968	7.58471e-09	3.45443e-05	Peroxidase superfamily protein
AT5G46050	NPF5.2	2.69668	7.23857e-05	0.00401436	peptide transporter 3
AT3G02840	AT3G02840	2.67958	0.000517411	0.0124962	ARM repeat superfamily protein
AT5G46350	WRKY8	2.67904	2.47993e-05	0.00211143	WRKY DNA-binding protein 8
AT3G13950	AT3G13950	2.66276	0.0008652	0.0169642
AT4G39210	APL3	2.66261	0.00276209	0.0338016	Glucose-1-phosphate adenylyltransferase family protein
AT3G61390	PUB36	2.65855	0.00198258	0.0273864	RING/U-box superfamily protein
AT2G28400	AT2G28400	2.65347	1.6664e-05	0.00169985	Protein of unknown function, DUF584
AT5G52740	HIPP12	2.64788	5.70653e-05	0.00347979	Copper transport protein family
AT5G64890	PEP2	2.64053	0.00258213	0.0323475	elicitor peptide 2 precursor
AT5G10760	AED1	2.6396	6.31916e-05	0.00372586	Eukaryotic aspartyl protease family protein
AT2G06185	AT2G06185	2.63901	0.00491147	0.0483216
AT1G13340	AT1G13340	2.62223	1.93958e-06	0.000509059	Regulator of Vps4 activity in the MVB pathway protein
AT1G74010	AT1G74010	2.62208	4.70687e-07	0.000235603	Calcium-dependent phosphotriesterase superfamily protein
AT1G56060	AT1G56060	2.62177	4.73005e-05	0.00312892
AT4G16563	AT4G16563	2.61964	7.65612e-05	0.00414814	Eukaryotic aspartyl protease family protein
AT2G25000	WRKY60	2.61131	1.07793e-08	3.79147e-05	WRKY DNA-binding protein 60
AT3G21080	AT3G21080	2.60878	0.000757068	0.0156	ABC transporter-related
AT1G24147	AT1G24147	2.60725	4.74934e-05	0.00313447
AT4G21120	CAT1	2.60503	0.00166461	0.0247193	amino acid transporter 1
AT1G51960	IQD27	2.59982	0.000485145	0.0120327	IQ-domain 27
AT5G26170	WRKY50	2.59147	0.00102828	0.0187719	WRKY DNA-binding protein 50
AT2G30550	AT2G30550	2.58723	5.39678e-09	3.42816e-05	alpha/beta-Hydrolases superfamily protein
AT4G23150	CRK7	2.58547	0.000120567	0.0053267	cysteine-rich RLK (RECEPTOR-like protein kinase) 7
AT1G09380	AT1G09380	2.58218	0.00101163	0.0185774	nodulin MtN21 /EamA-like transporter family protein
AT3G60415	AT3G60415	2.57327	5.14592e-05	0.00327474
AT4G30280	XTH18	2.57315	0.000107074	0.00503576	xyloglucan endotransglucosylase/hydrolase 18
AT3G50570	AT3G50570	2.56333	1.38245e-06	0.000414412	hydroxyproline-rich glycoprotein family protein
AT1G45145	TRX5	2.55512	2.09476e-05	0.00194081	thioredoxin H-type 5
AT1G53625	AT1G53625	2.55436	0.00209556	0.0283848
AT2G25297	AT2G25297	2.54927	7.87465e-05	0.00423081
AT3G12220	SCPL16	2.54784	0.00346958	0.0388687	serine carboxypeptidase-like 16
AT3G06325	AT3G06325	2.54564	5.60741e-05	0.00345217
AT3G10815	AT3G10815	2.54204	1.04402e-06	0.000372078	RING/U-box superfamily protein
AT3G11402	AT3G11402	2.54016	8.44433e-07	0.000335393	Cysteine/Histidine-rich C1 domain family protein
AT3G23630	IPT7	2.53889	0.000327576	0.00943918	isopentenyltransferase 7
AT3G51660	AT3G51660	2.536	5.74986e-09	3.42816e-05	Tautomerase/MIF superfamily protein
AT5G49850	JAL46	2.51477	9.12232e-05	0.00455052	Mannose-binding lectin superfamily protein
AT3G45970	EXLA1	2.51326	0.0029112	0.0349362	expansin-like A1
AT5G64120	PER71	2.50818	6.43727e-06	0.000984962	Peroxidase superfamily protein
AT1G70440	SRO3	2.50782	0.0026787	0.0331479	similar to RCD one 3
AT4G27480	AT4G27480	2.50741	7.22255e-06	0.00106268	Core-2/I-branching beta-1,6-N-acetylglucosaminyltransferase family protein
AT1G51920	AT1G51920	2.50675	0.00106484	0.019145
AT5G20230	BCB	2.49495	1.39696e-05	0.00150867	blue-copper-binding protein
AT3G01830	CML40	2.49038	1.2393e-06	0.000391674	Calcium-binding EF-hand family protein
AT3G11010	AtRLP34	2.48439	0.000175032	0.00662436	receptor like protein 34
AT5G24200	AT5G24200	2.47951	2.02865e-06	0.000509059	alpha/beta-Hydrolases superfamily protein
AT1G76470	AT1G76470	2.47156	0.00137989	0.0222861	NAD(P)-binding Rossmann-fold superfamily protein
AT5G44568	AT5G44568	2.47155	1.80473e-07	0.000142401
AT3G01970	WRKY45	2.46983	0.000155559	0.00611294	WRKY DNA-binding protein 45
AT4G23600	CORI3	2.46028	5.1872e-05	0.00327519	Tyrosine transaminase family protein
AT1G65610	KOR2	2.45586	1.71501e-07	0.000142401	Six-hairpin glycosidases superfamily protein
AT3G03470	CYP89A9	2.44094	9.73982e-05	0.00473341	cytochrome P450, family 87, subfamily A, polypeptide 9
AT4G21380	SD18	2.43941	0.000230227	0.00774871	receptor kinase 3
AT3G28210	SAP12	2.42082	0.000827883	0.0165757	zinc finger (AN1-like) family protein
AT4G23610	AT4G23610	2.42073	5.5498e-06	0.000890049	Late embryogenesis abundant (LEA) hydroxyproline-rich glycoprotein family
AT5G47850	CCR4	2.41974	0.000509365	0.0123881	CRINKLY4 related 4
AT1G58225	AT1G58225	2.41547	0.00148774	0.023131
AT4G16260	AT4G16260	2.40971	7.06174e-07	0.00029593	Glycosyl hydrolase superfamily protein
AT5G51465	AT5G51465	2.40224	0.000622594	0.0140138
AT2G32660	AtRLP22	2.39908	0.00170198	0.0250877	receptor like protein 22
AT1G17960	AT1G17960	2.39767	0.00232709	0.0301948	Threonyl-tRNA synthetase
AT2G46400	WRKY46	2.38812	0.00363523	0.0398905	WRKY DNA-binding protein 46
AT2G39710	AT2G39710	2.38411	4.61813e-08	7.05365e-05	Eukaryotic aspartyl protease family protein
AT5G24160	SQE6	2.38208	0.000116168	0.00526101	squalene monoxygenase 6
AT1G67520	AT1G67520	2.36877	2.61004e-06	0.000593737	lectin protein kinase family protein
AT1G52040	MBP1	2.36826	0.00473852	0.0470857	myrosinase-binding protein 1
AT5G44567	AT5G44567	2.36728	1.2325e-05	0.00141772
AT1G22400	UGT85A1	2.36344	0.00011803	0.00526537	UDP-Glycosyltransferase superfamily protein
AT3G29810	COBL3	2.35577	3.436e-05	0.00257057	COBRA-like protein 2 precursor
AT1G36622	AT1G36622	2.35112	3.65641e-05	0.00268374
AT1G69870	NPF2.13	2.33049	1.00965e-07	0.000111671	nitrate transporter 1.7
AT3G26210	CYP71B23	2.33035	2.49114e-06	0.000583236	cytochrome P450, family 71, subfamily B, polypeptide 23
AT1G63245	CLE14	2.32732	0.000410002	0.0109045	CLAVATA3/ESR-RELATED 14
AT3G11340	UGT76B1	2.31648	1.25692e-06	0.000391674	UDP-Glycosyltransferase superfamily protein
AT1G08050	AT1G08050	2.31465	1.25479e-05	0.00142768	Zinc finger (C3HC4-type RING finger) family protein
AT2G16586	AT2G16586	2.30157	0.00393278	0.041978
AT3G51450	SSL7	2.29739	4.7745e-07	0.000235603	Calcium-dependent phosphotriesterase superfamily protein
AT2G28650	ATEXO70H8	2.29676	0.000241431	0.00795325	exocyst subunit exo70 family protein H8
AT4G25110	AMC2	2.29619	6.41277e-09	3.42816e-05	metacaspase 2
AT5G25450	QCR7-2	2.2875	0.000134002	0.00564798	Cytochrome bd ubiquinol oxidase, 14kDa subunit
AT3G04720	HEL	2.28655	4.0669e-06	0.000762842	pathogenesis-related 4
AT3G17690	CNGC19	2.27441	0.000136185	0.00567404	cyclic nucleotide gated channel 19
AT3G60540	AT3G60540	2.27046	0.000156752	0.00614648	Preprotein translocase Sec, Sec61-beta subunit protein
AT2G25470	AtRLP21	2.26562	0.00016943	0.0064773	receptor like protein 21
AT1G33030	AT1G33030	2.26121	0.000175135	0.00662436	O-methyltransferase family protein
AT5G36910	THI2.2	2.26011	0.00420477	0.0437087	thionin 2.2
AT1G18830	SEC31A	2.25869	0.000300848	0.00889854	Transducin/WD40 repeat-like superfamily protein
AT4G32810	CCD8	2.25712	0.000427429	0.0111462	carotenoid cleavage dioxygenase 8
AT1G19200	FLZ12	2.25312	9.16162e-05	0.00455967	Protein of unknown function (DUF581)
AT2G32140	AT2G32140	2.24509	0.000874611	0.0170951	transmembrane receptors
AT1G29290	CEP14	2.24204	0.000977261	0.0182136
AT1G32940	SBT3.5	2.24064	1.1967e-06	0.000388767	Subtilase family protein
AT5G01100	FRB1	2.24019	2.1565e-05	0.00197098	O-fucosyltransferase family protein
AT5G52640	HSP90-1	2.2366	0.00315055	0.0366402	heat shock protein 90.1
AT4G08870	ARGAH2	2.23646	5.00264e-06	0.000851063	Arginase/deacetylase superfamily protein
AT1G70140	FH8	2.23073	5.05004e-07	0.000239792	formin 8
AT4G14370	AT4G14370	2.22413	6.49492e-05	0.003774	Disease resistance protein (TIR-NBS-LRR class) family
AT3G28540	AT3G28540	2.22346	8.61588e-09	3.45443e-05	P-loop containing nucleoside triphosphate hydrolases superfamily protein
AT1G65500	AT1G65500	2.22195	3.53429e-05	0.00261203
AT1G67000	LRK10L-2.8	2.21819	0.000584453	0.0134963	Protein kinase superfamily protein
AT2G32830	PHT1-5	2.20742	0.00385424	0.0414292	phosphate transporter 1;5
AT2G18690	AT2G18690	2.20124	0.00291502	0.0349399
AT3G61280	AT3G61280	2.1939	0.000178747	0.00670561	Arabidopsis thaliana protein of unknown function (DUF821)
AT2G26440	PME12	2.19122	2.815e-08	5.40767e-05	Plant invertase/pectin methylesterase inhibitor superfamily
AT5G01380	GT-3A	2.18861	0.000203812	0.00723952	Homeodomain-like superfamily protein
AT4G15236	ABCG43	2.1781	4.15043e-06	0.000765992	ABC-2 and Plant PDR ABC-type transporter family protein
AT5G05600	AT5G05600	2.17151	0.00238414	0.030736	2-oxoglutarate (2OG) and Fe(II)-dependent oxygenase superfamily protein
AT4G14365	XBAT34	2.1637	0.000695535	0.0148234	XB3 ortholog 4 in Arabidopsis thaliana
AT3G14700	AT3G14700	2.16174	0.00330652	0.0377245	SART-1 family
AT2G45760	BAP2	2.15934	0.00156238	0.0238181	BON association protein 2
AT5G14490	anac085	2.15913	0.00338852	0.0383104	NAC domain containing protein 85
AT5G38900	AT5G38900	2.15465	0.000268897	0.00835813	Thioredoxin superfamily protein
AT5G48657	AT5G48657	2.15269	5.17032e-05	0.00327474	defense protein-related
AT3G02240	RGF7	2.13767	0.000118803	0.00528515
AT4G39670	AT4G39670	2.1335	8.93466e-07	0.000347991	Glycolipid transfer protein (GLTP) family protein
AT2G36770	UGT73C4	2.13145	0.00149254	0.0231397	UDP-Glycosyltransferase superfamily protein
AT5G42830	AT5G42830	2.1305	8.08786e-05	0.00425974	HXXXD-type acyl-transferase family protein
AT1G51760	ILL4	2.12786	9.34174e-08	0.000110025	peptidase M20/M25/M40 family protein
AT3G22560	AT3G22560	2.12522	0.00203786	0.0278621	Acyl-CoA N-acyltransferases (NAT) superfamily protein
AT1G23850	AT1G23850	2.12491	4.31651e-07	0.000230753
AT3G56891	HIPP45	2.1166	0.000121084	0.0053422	Heavy metal transport/detoxification superfamily protein
AT3G51860	CAX3	2.11429	3.0679e-07	0.000199888	cation exchanger 3
AT3G51440	SSL6	2.11294	6.28957e-08	8.64928e-05	Calcium-dependent phosphotriesterase superfamily protein
AT4G40020	AT4G40020	2.10649	0.000127011	0.00543907	Myosin heavy chain-related protein
AT1G55390	AT1G55390	2.10506	0.00013692	0.00567404	Cysteine/Histidine-rich C1 domain family protein
AT2G32030	AT2G32030	2.10415	9.99152e-06	0.00126671	Acyl-CoA N-acyltransferases (NAT) superfamily protein
AT3G13090	ABCC6	2.10134	4.14093e-06	0.000765992	multidrug resistance-associated protein 8
AT3G02410	ICMEL2	2.09638	0.00068011	0.0146782	alpha/beta-Hydrolases superfamily protein
AT4G01895	AT4G01895	2.09604	7.2465e-05	0.00401436	systemic acquired resistance (SAR) regulator protein NIMIN-1-related
AT1G60130	JAL18	2.09494	0.000263103	0.0082898	Mannose-binding lectin superfamily protein
AT3G08860	PYD4	2.09436	0.000717592	0.0150872	PYRIMIDINE 4
AT4G30270	XTH24	2.08991	2.48811e-05	0.00211143	xyloglucan endotransglucosylase/hydrolase 24
AT5G52760	HIPP14	2.08823	0.00135884	0.0221243	Copper transport protein family
AT1G10550	XTH33	2.08294	0.00191685	0.0267782	xyloglucan:xyloglucosyl transferase 33
AT3G28340	GATL10	2.08012	7.89964e-06	0.00112614	galacturonosyltransferase-like 10
AT2G34930	AT2G34930	2.07927	0.000193033	0.00702636	disease resistance family protein / LRR family protein
AT3G21230	4CL4	2.07087	0.000101074	0.0048532	4-coumarate:CoA ligase 5
AT2G42370	AT2G42370	2.07086	0.000626947	0.0140625
AT4G31800	WRKY18	2.06969	3.87818e-07	0.000223305	WRKY DNA-binding protein 18
AT2G38250	GT-3B	2.05907	9.23953e-05	0.00458049	Homeodomain-like superfamily protein
AT2G21510	AT2G21510	2.05523	0.00170525	0.0251244	DNAJ heat shock N-terminal domain-containing protein
AT5G13490	AAC2	2.05191	9.60467e-08	0.000110025	ADP/ATP carrier 2
AT1G71140	DTX14	2.04743	0.000170861	0.00650103	MATE efflux family protein
AT5G65600	LECRK92	2.02978	6.24342e-05	0.00368799	Concanavalin A-like lectin protein kinase family protein
AT5G58670	PLC1	2.02849	1.32472e-07	0.000128759	phospholipase C1
AT5G38780	AT5G38780	2.02055	0.00310748	0.0363496	S-adenosyl-L-methionine-dependent methyltransferases superfamily protein
AT4G23160	CRK8	2.01814	0.000626168	0.014058	cysteine-rich RLK (RECEPTOR-like protein kinase) 8
AT4G23210	CRK13	2.01538	6.61877e-06	0.0009967	cysteine-rich RLK (RECEPTOR-like protein kinase) 13
AT5G10380	ATL55	2.01231	4.53622e-07	0.000235603	RING/U-box superfamily protein
AT5G05300	AT5G05300	2.0095	0.000201436	0.00722815
AT4G33150	AT4G33150	2.00842	0.000333642	0.00957205	lysine-ketoglutarate reductase/saccharopine dehydrogenase bifunctional enzyme
AT5G48410	GLR1.3	2.007	0.000650807	0.014337	glutamate receptor 1.3
AT1G65484	AT1G65484	2.00551	5.2526e-05	0.00329057
AT3G12580	MED37C	2.00286	0.00344954	0.0387545	heat shock protein 70
AT3G46080	ZAT8	2.00176	0.000927301	0.0176832	C2H2-type zinc finger family protein
AT1G68850	PER11	-2.00304	0.000606232	0.0138005	Peroxidase superfamily protein
AT5G48070	XTH20	-2.00551	0.00409833	0.0429908	xyloglucan endotransglucosylase/hydrolase 20
AT3G52720	ACA1	-2.00646	8.46065e-05	0.00435726	alpha carbonic anhydrase 1
AT5G19410	AT5G19410	-2.01034	8.07153e-05	0.00425949	ABC-2 type transporter family protein
AT2G32510	MAPKKK17	-2.01322	0.000321736	0.00933909	mitogen-activated protein kinase kinase kinase 17
AT5G66690	UGT72E2	-2.01469	0.00115148	0.0200927	UDP-Glycosyltransferase superfamily protein
AT5G20150	SPX1	-2.02059	0.000919612	0.0176351	SPX domain gene 1
AT5G42630	KAN4	-2.02614	0.00326106	0.0374218	Homeodomain-like superfamily protein
AT5G44870	LAZ5	-2.02797	0.000165488	0.00636585	Disease resistance protein (TIR-NBS-LRR class) family
AT5G58860	CYP86A1	-2.02871	0.00511101	0.0496474	cytochrome P450, family 86, subfamily A, polypeptide 1
AT2G32990	AtGH9B8	-2.03433	4.61941e-05	0.00312048	glycosyl hydrolase 9B8
AT5G20830	SUS1	-2.04094	5.34441e-06	0.000874602	sucrose synthase 1
AT3G44990	XTH31	-2.04358	0.000619045	0.0139796	xyloglucan endo-transglycosylase-related 8
AT3G01190	PER27	-2.04753	0.000341695	0.00973344	Peroxidase superfamily protein
AT1G64360	AT1G64360	-2.04854	5.17628e-05	0.00327474
AT1G44970	PER9	-2.0502	0.00189463	0.0265141	Peroxidase superfamily protein
AT3G63440	CKX6	-2.05131	1.45406e-07	0.000133585	cytokinin oxidase/dehydrogenase 6
AT1G04610	YUC3	-2.05181	0.00497387	0.0487285	YUCCA 3
AT4G12270	AT4G12270	-2.05378	0.00347061	0.0388687	Copper amine oxidase family protein
AT5G48485	DIR1	-2.05636	0.00159945	0.0241355	Bifunctional inhibitor/lipid-transfer protein/seed storage 2S albumin superfamily protein
AT5G44550	AT5G44550	-2.06353	5.15292e-06	0.00086299	Uncharacterised protein family (UPF0497)
AT1G63450	GT16	-2.06933	0.0014961	0.0231654	root hair specific 8
AT1G80760	NIP6-1	-2.07285	1.23706e-06	0.000391674	NOD26-like intrinsic protein 6;1
AT5G37690	AT5G37690	-2.07333	0.00252464	0.031924	SGNH hydrolase-type esterase superfamily protein
AT5G63660	PDF2.5	-2.07449	0.00258792	0.032351	Scorpion toxin-like knottin superfamily protein
AT5G36180	SCPL1	-2.0756	0.00265619	0.0329456	serine carboxypeptidase-like 1
AT4G05200	CRK25	-2.07715	0.000680191	0.0146782	cysteine-rich RLK (RECEPTOR-like protein kinase) 25
AT2G47460	MYB12	-2.08944	0.00113096	0.0199535	myb domain protein 12
AT3G03530	NPC4	-2.08989	0.000509437	0.0123881	non-specific phospholipase C4
AT5G44578	AT5G44578	-2.10083	0.000560078	0.0131416
AT1G29720	RFK1	-2.10108	7.17092e-05	0.0040035	Leucine-rich repeat transmembrane protein kinase
AT5G13580	ABCG6	-2.10515	0.000733045	0.0153076	ABC-2 type transporter family protein
AT4G36610	AT4G36610	-2.10523	3.22552e-05	0.0024633	alpha/beta-Hydrolases superfamily protein
AT1G63930	ROH1	-2.10594	0.00305953	0.0359862	from the Czech 'roh' meaning 'corner'
AT2G16060	AHB1	-2.10642	0.000164593	0.00636062	hemoglobin 1
AT3G11430	GPAT5	-2.1082	5.27007e-05	0.00329508	glycerol-3-phosphate acyltransferase 5
AT1G66725	MIR163	-2.11225	0.000357947	0.0099836	MIR163; miRNA
AT4G22235	AT4G22235	-2.11367	4.46832e-05	0.00306242	Arabidopsis defensin-like protein
AT5G39150	AT5G39150	-2.11545	0.000853245	0.0168417	RmlC-like cupins superfamily protein
AT1G07260	UGT71C3	-2.11636	0.00363308	0.0398805	UDP-glucosyl transferase 71C3
AT5G26290	AT5G26290	-2.11945	0.000189129	0.00696476	TRAF-like family protein
AT2G22240	IPS2	-2.12288	7.10416e-07	0.00029593	myo-inositol-1-phosphate synthase 2
AT3G50300	AT3G50300	-2.12301	0.000594375	0.0136468	HXXXD-type acyl-transferase family protein
AT1G26790	AT1G26790	-2.1239	0.00371442	0.0404153	Dof-type zinc finger DNA-binding family protein
AT1G66800	AT1G66800	-2.12541	0.00310856	0.0363496	NAD(P)-binding Rossmann-fold superfamily protein
AT1G61230	AT1G61230	-2.12557	0.00327983	0.0375448	Mannose-binding lectin superfamily protein
AT5G19650	OFP8	-2.12866	0.00297292	0.0353044	ovate family protein 8
AT2G48080	AT2G48080	-2.13032	0.00308855	0.0361724	oxidoreductase, 2OG-Fe(II) oxygenase family protein
AT5G09480	AT5G09480	-2.13172	0.000268322	0.00835813	hydroxyproline-rich glycoprotein family protein
AT1G01750	ADF11	-2.15136	0.00113474	0.0199691	actin depolymerizing factor 11
AT4G30110	HMA2	-2.15346	2.27932e-06	0.000562379	heavy metal atpase 2
AT4G21990	APR3	-2.16184	7.64955e-06	0.00110522	APS reductase 3
AT1G08590	PXL1	-2.16968	1.02003e-06	0.000372078	Leucine-rich receptor-like protein kinase family protein
AT1G05260	PER3	-2.17227	0.00152228	0.0234408	Peroxidase superfamily protein
AT4G31470	AT4G31470	-2.17748	0.000570439	0.0132977	CAP (Cysteine-rich secretory proteins, Antigen 5, and Pathogenesis-related 1 protein) superfamily protein
AT4G21760	BGLU47	-2.17828	0.00022211	0.00760318	beta-glucosidase 47
AT2G38380	PER22	-2.18501	0.00216338	0.0290094	Peroxidase superfamily protein
AT1G43650	AT1G43650	-2.1888	0.0029262	0.0350305	nodulin MtN21 /EamA-like transporter family protein
AT3G21680	AT3G21680	-2.20136	0.00227758	0.0297587
AT4G02850	AT4G02850	-2.20621	0.00055518	0.0130842	phenazine biosynthesis PhzC/PhzF family protein
AT5G49120	FLZ15	-2.20782	0.00171486	0.025162	Protein of unknown function (DUF581)
AT1G23720	AT1G23720	-2.20788	0.00260617	0.0325138	Proline-rich extensin-like family protein
AT3G15050	IQD10	-2.20903	0.00416497	0.0434443	IQ-domain 10
AT3G51895	SULTR3	-2.20954	3.19181e-07	0.000199888	sulfate transporter 3;1
AT1G56320	AT1G56320	-2.21325	0.000206217	0.00730068
AT4G17280	AT4G17280	-2.21533	0.000136105	0.00567404	Auxin-responsive family protein
AT1G54540	AT1G54540	-2.22236	0.000349424	0.0098747	Late embryogenesis abundant (LEA) hydroxyproline-rich glycoprotein family
AT1G14240	APY3	-2.22735	9.39043e-06	0.00123067	GDA1/CD39 nucleoside phosphatase family protein
AT5G67060	HEC1	-2.22757	0.000126145	0.00541731	basic helix-loop-helix (bHLH) DNA-binding superfamily protein
AT4G00070	AT4G00070	-2.22874	0.000540962	0.0128529	RING/U-box superfamily protein
AT1G76650	CML38	-2.22952	5.30039e-05	0.00330116	calmodulin-like 38
AT3G55580	AT3G55580	-2.22996	0.00341528	0.0385045	Regulator of chromosome condensation (RCC1) family protein
AT3G25790	HHO1	-2.23037	0.00104885	0.018996	myb-like transcription factor family protein
AT4G13890	SHM5	-2.23059	0.00224946	0.0295908	Pyridoxal phosphate (PLP)-dependent transferases superfamily protein
AT1G76952	IDL5	-2.23062	0.000699784	0.0148843	inflorescence deficient in abscission (IDA)-like 5
AT3G10040	AT3G10040	-2.23184	8.32974e-05	0.00434433	sequence-specific DNA binding transcription factors
AT2G30340	LBD13	-2.24662	0.000390857	0.0105706	LOB domain-containing protein 13
AT1G77520	AT1G77520	-2.24703	0.00508996	0.0495329	O-methyltransferase family protein
AT5G09520	PELPK2	-2.25251	3.89072e-05	0.00281395	hydroxyproline-rich glycoprotein family protein
AT5G20860	AT5G20860	-2.25497	0.000644692	0.0142583	Plant invertase/pectin methylesterase inhibitor superfamily
AT3G24300	AMT1-3	-2.25618	0.000683311	0.0146782	ammonium transporter 1;3
AT3G24240	RCH2	-2.2616	0.000570598	0.0132977	Leucine-rich repeat receptor-like protein kinase family protein
AT1G15210	ABCG35	-2.26413	0.000538838	0.0128404	pleiotropic drug resistance 7
AT2G12646	AT2G12646	-2.26443	0.00172046	0.0251881	PLATZ transcription factor family protein
AT5G36260	AT5G36260	-2.26531	0.00511689	0.0496894	Eukaryotic aspartyl protease family protein
AT3G48340	CEP2	-2.27294	0.00140997	0.0225288	Cysteine proteinases superfamily protein
AT5G15120	PCO1	-2.27554	7.50706e-06	0.00109315	Protein of unknown function (DUF1637)
AT1G73330	ATDR4	-2.27899	0.00103847	0.0188934	drought-repressed 4
AT4G11290	PER39	-2.28586	8.80918e-06	0.00119631	Peroxidase superfamily protein
AT5G47635	AT5G47635	-2.28596	0.00122169	0.0208324	Pollen Ole e 1 allergen and extensin family protein
AT5G25810	TINY	-2.29708	0.00010595	0.00501233	Integrase-type DNA-binding superfamily protein
AT5G14690	AT5G14690	-2.29716	0.000378607	0.0103793
AT3G54770	ARP1	-2.30337	0.00050223	0.012297	RNA-binding (RRM/RBD/RNP motifs) family protein
AT3G60490	ERF035	-2.30618	0.0014277	0.0227038	Integrase-type DNA-binding superfamily protein
AT1G08670	AT1G08670	-2.31392	0.00398686	0.0422879	ENTH/VHS family protein
AT4G28650	MIK1	-2.31521	2.24525e-05	0.00203612	Leucine-rich repeat transmembrane protein kinase family protein
AT1G27140	GSTU14	-2.32238	0.00162128	0.0243297	glutathione S-transferase tau 14
AT2G01880	PAP7	-2.3256	0.00147714	0.0230556	purple acid phosphatase 7
AT1G33540	SCPL18	-2.33464	0.00359825	0.0397246	serine carboxypeptidase-like 18
AT5G24660	LSU2	-2.33549	0.00304228	0.035886	response to low sulfur 2
AT3G03270	AT3G03270	-2.34355	4.89901e-06	0.000844815	Adenine nucleotide alpha hydrolases-like superfamily protein
AT2G24610	ATCNGC14	-2.35221	0.000298622	0.00886564	cyclic nucleotide-gated channel 14
AT4G12520	AT4G12520	-2.35651	0.000382016	0.0104194	Bifunctional inhibitor/lipid-transfer protein/seed storage 2S albumin superfamily protein
AT5G13990	ATEXO70C2	-2.35892	0.0020511	0.0280072	exocyst subunit exo70 family protein C2
AT3G45680	NPF2.3	-2.36554	3.16008e-05	0.00244979	Major facilitator superfamily protein
AT1G77530	AT1G77530	-2.37339	0.00161353	0.0242749	O-methyltransferase family protein
AT1G20700	WOX14	-2.37534	0.00106737	0.0191798	WUSCHEL related homeobox 14
AT5G06090	GPAT7	-2.38132	0.00347888	0.0389069	glycerol-3-phosphate acyltransferase 7
AT3G20460	AT3G20460	-2.38169	0.000939552	0.017822	Major facilitator superfamily protein
AT5G24100	AT5G24100	-2.38723	0.000185359	0.00686534	Leucine-rich repeat protein kinase family protein
AT5G15960	KIN1	-2.38794	0.00230382	0.0300215	stress-responsive protein (KIN1) / stress-induced protein (KIN1)
AT4G12510	AT4G12510	-2.3905	0.000692753	0.014774	Bifunctional inhibitor/lipid-transfer protein/seed storage 2S albumin superfamily protein
AT1G07490	RTFL3	-2.39162	0.00455971	0.0460353	ROTUNDIFOLIA like 3
AT1G19900	AT1G19900	-2.39994	0.00196975	0.02729	glyoxal oxidase-related protein
AT5G17820	AT5G17820	-2.40045	0.0013549	0.0220891	Peroxidase superfamily protein
AT5G40510	AT5G40510	-2.40166	0.00048209	0.0119784	Sucrase/ferredoxin-like family protein
AT2G05180	CYP705A6	-2.4104	0.00223624	0.0294931	cytochrome P450, family 705, subfamily A, polypeptide 6
AT2G29750	UGT71C1	-2.41875	0.000116068	0.00526101	UDP-glucosyl transferase 71C1
AT5G43530	RAD5B	-2.42303	0.000155252	0.00611007	Helicase protein with RING/U-box domain
AT3G29670	PMAT2	-2.4248	4.95813e-05	0.0031928	HXXXD-type acyl-transferase family protein
AT5G23990	ATFRO5	-2.42709	0.00237065	0.030599	ferric reduction oxidase 5
AT4G15160	AT4G15160	-2.43173	0.000440741	0.011364	Bifunctional inhibitor/lipid-transfer protein/seed storage 2S albumin superfamily protein
AT4G08400	AT4G08400	-2.43613	0.00382999	0.0413069	Proline-rich extensin-like family protein
AT5G51060	RBOHC	-2.44124	0.00068873	0.0147115	NADPH/respiratory burst oxidase protein D
AT1G66270	BGLU21	-2.44396	0.00455985	0.0460353	Glycosyl hydrolase superfamily protein
AT1G74460	AT1G74460	-2.45846	3.17015e-05	0.00244979	GDSL-like Lipase/Acylhydrolase superfamily protein
AT1G22220	AT1G22220	-2.45969	8.61038e-06	0.00118951	F-box family protein
AT5G39180	AT5G39180	-2.4606	0.000660145	0.0144739	RmlC-like cupins superfamily protein
AT4G12050	AHL26	-2.46456	0.000240206	0.0079347	Predicted AT-hook DNA-binding family protein
AT3G61680	PLIP1	-2.46785	0.000425427	0.0111302	alpha/beta-Hydrolases superfamily protein
AT3G20380	AT3G20380	-2.46855	0.000116053	0.00526101	TRAF-like family protein
AT5G58910	LAC16	-2.46925	0.000755534	0.0156	laccase 16
AT1G49860	GSTF14	-2.48663	0.000655564	0.0144022	glutathione S-transferase (class phi) 14
AT1G68940	AT1G68940	-2.49335	0.00444506	0.0453267	Armadillo/beta-catenin-like repeat family protein
AT5G39120	AT5G39120	-2.50185	3.17326e-05	0.00244979	RmlC-like cupins superfamily protein
AT4G39675	AT4G39675	-2.51884	0.000275958	0.0084783
AT2G25810	TIP4-1	-2.52447	3.24504e-05	0.00247232	tonoplast intrinsic protein 4;1
AT3G21180	ACA9	-2.53075	0.00059011	0.0135878	autoinhibited Ca(2+)-ATPase 9
AT2G47520	ERF071	-2.53169	0.00275237	0.0337454	Integrase-type DNA-binding superfamily protein
AT4G02290	AtGH9B13	-2.5432	4.81423e-06	0.000834683	glycosyl hydrolase 9B13
AT2G40130	SMXL8	-2.54856	0.000135671	0.00567404	Double Clp-N motif-containing P-loop nucleoside triphosphate hydrolases superfamily protein
AT1G53270	ABCG10	-2.55171	0.00148547	0.023131	ABC-2 type transporter family protein
AT5G45920	AT5G45920	-2.55831	4.20588e-05	0.00296748	SGNH hydrolase-type esterase superfamily protein
AT5G66280	GMD1	-2.58275	0.00032369	0.0093619	GDP-D-mannose 4,6-dehydratase 1
AT1G18420	ALMT3	-2.59223	0.00290356	0.0348808	Aluminium activated malate transporter family protein
AT2G15370	FUT5	-2.59782	0.0013236	0.0217599	fucosyltransferase 5
AT1G74890	ARR15	-2.6078	0.000189441	0.00696826	response regulator 15
AT4G22666	AT4G22666	-2.61188	0.000341483	0.00973344	Bifunctional inhibitor/lipid-transfer protein/seed storage 2S albumin superfamily protein
AT1G48100	AT1G48100	-2.61473	8.32136e-06	0.00117944	Pectin lyase-like superfamily protein
AT2G20750	EXPB1	-2.62412	0.00453588	0.0458736	expansin B1
AT5G62210	AT5G62210	-2.64598	2.31564e-06	0.000563269	Embryo-specific protein 3, (ATS3)
AT1G80240	AT1G80240	-2.64637	0.000518458	0.0125034	Protein of unknown function, DUF642
AT4G13280	TPS12	-2.64706	1.70173e-05	0.0017053	terpenoid synthase 12
AT5G05880	UGT76C4	-2.65151	0.000157169	0.0061553	UDP-Glycosyltransferase superfamily protein
AT4G14060	AT4G14060	-2.65823	0.000115599	0.00526101	Polyketide cyclase/dehydrase and lipid transport superfamily protein
AT1G05250	PER2	-2.65954	0.00432464	0.0444307	Peroxidase superfamily protein
AT1G48510	AT1G48510	-2.65974	0.000335111	0.00960561	Surfeit locus 1 cytochrome c oxidase biogenesis protein
AT5G49270	COBL9	-2.66245	0.000234523	0.00782759	COBRA-like extracellular glycosyl-phosphatidyl inositol-anchored protein family
AT1G22150	SULTR1	-2.66721	0.00402826	0.0425696	sulfate transporter 1;3
AT1G05240	PER2	-2.66958	0.00402325	0.0425473	Peroxidase superfamily protein
AT1G04660	AT1G04660	-2.69202	0.00132944	0.0217894	glycine-rich protein
AT3G44070	AT3G44070	-2.69497	0.00249598	0.0316938	Glycosyl hydrolase family 35 protein
AT3G44510	AT3G44510	-2.69602	0.00483	0.0477402	alpha/beta-Hydrolases superfamily protein
AT5G26200	AT5G26200	-2.69629	1.5694e-05	0.00165098	Mitochondrial substrate carrier family protein
AT2G30210	LAC3	-2.7081	2.42166e-06	0.000583236	laccase 3
AT2G23050	NPY4	-2.73033	0.00126864	0.0212823	Phototropic-responsive NPH3 family protein
AT1G13610	AT1G13610	-2.74107	0.00027997	0.00854677	alpha/beta-Hydrolases superfamily protein
AT3G15240	AT3G15240	-2.74168	0.00101184	0.0185774	Serine/threonine-protein kinase WNK (With No Lysine)-related
AT5G48940	RCH1	-2.74895	0.000551568	0.0130276	Leucine-rich repeat transmembrane protein kinase family protein
AT5G60520	AT5G60520	-2.76229	0.000403736	0.0108096	Late embryogenesis abundant (LEA) protein-related
AT1G77120	ADH1	-2.76354	0.000707353	0.014936	alcohol dehydrogenase 1
AT5G19520	MSL9	-2.76357	0.000219303	0.00754858	mechanosensitive channel of small conductance-like 9
AT5G26220	GGCT2	-2.76486	0.000542583	0.0128533	ChaC-like family protein
AT1G04770	AT1G04770	-2.76515	1.36538e-09	1.45982e-05	Tetratricopeptide repeat (TPR)-like superfamily protein
AT2G30130	LBD12	-2.77253	0.000842948	0.01673	Lateral organ boundaries (LOB) domain family protein
AT3G26200	CYP71B22	-2.80357	3.62978e-08	6.12764e-05	cytochrome P450, family 71, subfamily B, polypeptide 22
AT1G18100	MFT	-2.80627	0.000395279	0.0106496	PEBP (phosphatidylethanolamine-binding protein) family protein
AT1G12010	AT1G12010	-2.80707	1.97861e-05	0.00187466	2-oxoglutarate (2OG) and Fe(II)-dependent oxygenase superfamily protein
AT1G54970	PRP1	-2.8079	0.00281003	0.0341666	proline-rich protein 1
AT4G31320	AT4G31320	-2.81041	0.00230448	0.0300215	SAUR-like auxin-responsive protein family
AT5G19790	RAP2-11	-2.81323	0.00302472	0.0357472	related to AP2 11
AT4G11880	AGL14	-2.82014	3.62592e-05	0.00266746	AGAMOUS-like 14
AT1G02810	PME7	-2.82929	5.35751e-05	0.00332383	Plant invertase/pectin methylesterase inhibitor superfamily
AT1G78815	LSH7	-2.83316	9.43313e-05	0.00464061	Protein of unknown function (DUF640)
AT5G16530	PIN5	-2.84241	4.64706e-05	0.00312892	Auxin efflux carrier family protein
AT3G02550	LBD41	-2.84413	6.40867e-07	0.000285497	LOB domain-containing protein 41
AT3G08490	AT3G08490	-2.84529	0.00295586	0.0351831
AT1G74500	PRE3	-2.85104	0.00102165	0.0186933	activation-tagged BRI1(brassinosteroid-insensitive 1)-suppressor 1
AT3G45070	AT3G45070	-2.85598	0.000267552	0.008348	P-loop containing nucleoside triphosphate hydrolases superfamily protein
AT3G05155	AT3G05155	-2.85689	0.000565035	0.0132385	Major facilitator superfamily protein
AT1G67105	AT1G67105	-2.86878	5.15978e-05	0.00327474	other RNA
AT2G18150	PER15	-2.87005	0.000203033	0.00722815	Peroxidase superfamily protein
AT5G57090	PIN2	-2.87116	0.00351744	0.0391981	Auxin efflux carrier family protein
AT5G48850	SDI1	-2.87218	0.00142655	0.0226967	Tetratricopeptide repeat (TPR)-like superfamily protein
AT2G17850	AT2G17850	-2.87377	8.57574e-05	0.0043909	Rhodanese/Cell cycle control phosphatase superfamily protein
AT5G42785	AT5G42785	-2.87725	0.000669446	0.0145477
AT5G42510	DIR1	-2.89369	0.000483039	0.0119919	Disease resistance-responsive (dirigent-like protein) family protein
AT5G38540	AT5G38540	-2.94342	0.0027337	0.0335951	Mannose-binding lectin superfamily protein
AT3G24210	AT3G24210	-2.96095	0.0031393	0.0365625	Ankyrin repeat family protein
AT3G49570	LSU3	-2.9928	0.000746995	0.015518	response to low sulfur 3
AT2G14820	NPY2	-2.99746	0.000766764	0.0157351	Phototropic-responsive NPH3 family protein
AT2G25980	JAL20	-3.0038	0.000232102	0.00777963	Mannose-binding lectin superfamily protein
AT4G16270	PER40	-3.00618	0.000517767	0.0124962	Peroxidase superfamily protein
AT4G10270	AT4G10270	-3.00768	5.1577e-06	0.00086299	Wound-responsive family protein
AT2G19590	ACO1	-3.0103	9.38943e-06	0.00123067	ACC oxidase 1
AT1G12740	CYP87A2	-3.03423	8.46399e-05	0.00435726	cytochrome P450, family 87, subfamily A, polypeptide 2
AT4G19980	AT4G19980	-3.04884	0.00162249	0.0243297
AT5G39890	PCO2	-3.05655	7.69901e-06	0.00110738	Protein of unknown function (DUF1637)
AT4G11610	AT4G11610	-3.08468	0.00181911	0.0259324	C2 calcium/lipid-binding plant phosphoribosyltransferase family protein
AT5G62310	IRE	-3.10111	0.00194778	0.0271042	AGC (cAMP-dependent, cGMP-dependent and protein kinase C) kinase family protein
AT3G59850	AT3G59850	-3.11065	0.0033222	0.0378139	Pectin lyase-like superfamily protein
AT2G39040	PER24	-3.12232	0.00431915	0.0444028	Peroxidase superfamily protein
AT3G21620	AT3G21620	-3.14245	0.00399779	0.0423618	ERD (early-responsive to dehydration stress) family protein
AT2G44110	MLO15	-3.14902	0.000503041	0.012298	Seven transmembrane MLO family protein
AT5G03545	AT4	-3.15429	5.32202e-07	0.000247397
AT3G43850	AT3G43850	-3.16369	0.0014728	0.0230103
AT5G25390	SHN3	-3.16402	0.00315387	0.0366632	Integrase-type DNA-binding superfamily protein
AT1G66470	BHLH83	-3.19333	0.00369202	0.0402794	ROOT HAIR DEFECTIVE6
AT5G66985	AT5G66985	-3.21307	2.80552e-05	0.00228143
AT5G57530	XTH12	-3.21845	0.00413719	0.0433063	xyloglucan endotransglucosylase/hydrolase 12
AT1G70260	AT1G70260	-3.22533	0.000429386	0.0111881	nodulin MtN21 /EamA-like transporter family protein
AT1G79580	SMB	-3.23351	0.000979742	0.0182387	NAC (No Apical Meristem) domain transcriptional regulator superfamily protein
AT5G14150	AT5G14150	-3.30756	6.64479e-05	0.00382642	Protein of unknown function, DUF642
AT4G23496	SP1L5	-3.30923	0.000282306	0.00856666	SPIRAL1-like5
AT5G26310	UGT72E3	-3.38474	0.0021686	0.0290464	UDP-Glycosyltransferase superfamily protein
AT5G01600	FER1	-3.40018	0.000496959	0.0122145	ferretin 1
AT3G50640	AT3G50640	-3.45545	0.000426664	0.0111462
AT5G20450	AT5G20450	-3.46164	0.00207767	0.0282379
AT3G01840	LYK2	-3.5047	5.8735e-06	0.000928042	Protein kinase superfamily protein
AT3G47720	SRO4	-3.50983	0.00144025	0.0227775	similar to RCD one 4
AT1G26250	AT1G26250	-3.53143	2.02314e-05	0.0018919	Proline-rich extensin-like family protein
AT4G37682	AT4G37682	-3.56307	0.00305888	0.0359862	Protein of unknown function (DUF1399)
AT3G07970	QRT2	-3.56485	3.87704e-06	0.000740215	Pectin lyase-like superfamily protein
AT5G14650	AT5G14650	-3.57915	0.000124026	0.00538494	Pectin lyase-like superfamily protein
AT5G46900	AT5G46900	-3.58934	0.000122081	0.00535017	Bifunctional inhibitor/lipid-transfer protein/seed storage 2S albumin superfamily protein
AT3G46270	AT3G46270	-3.61365	3.94544e-05	0.00283081	receptor protein kinase-related
AT1G12805	AT1G12805	-3.62549	0.00456031	0.0460353	nucleotide binding
AT5G45200	AT5G45200	-3.63476	0.00491802	0.0483437	Disease resistance protein (TIR-NBS-LRR class) family
AT2G39510	AT2G39510	-3.63489	0.00137348	0.0222161	nodulin MtN21 /EamA-like transporter family protein
AT5G10130	DFC	-3.66327	0.000391729	0.0105853	Pollen Ole e 1 allergen and extensin family protein
AT4G19030	NIP1-1	-3.68168	2.55909e-05	0.00216008	NOD26-like major intrinsic protein 1
AT5G51720	NEET	-3.68577	4.79247e-06	0.000834683	2 iron, 2 sulfur cluster binding
AT3G60280	UCC3	-3.72249	0.00013688	0.00567404	uclacyanin 3
AT2G47530	AT2G47530	-3.73809	0.00328671	0.0375968	Pollen Ole e 1 allergen and extensin family protein
AT1G43800	S-ACP-DES6	-3.75932	0.000193203	0.00702636	Plant stearoyl-acyl-carrier-protein desaturase family protein
AT3G13784	CWINV5	-3.79177	0.00051652	0.0124848	cell wall invertase 5
AT2G14510	AT2G14510	-3.79244	0.00425059	0.0439601	Leucine-rich repeat protein kinase family protein
AT2G33350	AT2G33350	-3.85205	0.00100097	0.0184994	CCT motif family protein
AT4G10640	IQD16	-3.87049	0.00162052	0.0243297	IQ-domain 16
AT5G15720	GLIP7	-3.94179	0.000919832	0.0176351	GDSL-motif lipase 7
AT5G24880	AT5G24880	-3.96951	0.00162939	0.0243763
AT5G58750	AT5G58750	-4.03893	6.54376e-05	0.0037955	NAD(P)-binding Rossmann-fold superfamily protein
AT1G33750	TPS22	-4.04796	0.00144283	0.0227775	Terpenoid cyclases/Protein prenyltransferases superfamily protein
AT4G10265	AT4G10265	-4.09377	0.000389838	0.0105642	Wound-responsive family protein
AT4G23340	AT4G23340	-4.11751	0.000444935	0.0114537	2-oxoglutarate (2OG) and Fe(II)-dependent oxygenase superfamily protein
AT2G31920	AT2G31920	-4.1552	0.00322844	0.037205	Plant protein of unknown function (DUF936)
AT1G23110	AT1G23110	-4.19703	0.00190554	0.0266319
AT2G19970	AT2G19970	-4.2033	0.00245055	0.0313028	CAP (Cysteine-rich secretory proteins, Antigen 5, and Pathogenesis-related 1 protein) superfamily protein
AT4G22110	AT4G22110	-4.20658	0.00134709	0.0219887	GroES-like zinc-binding dehydrogenase family protein
AT2G25160	CYP82F1	-4.24344	0.00158901	0.024064	cytochrome P450, family 82, subfamily F, polypeptide 1
AT1G50580	UGT79B5	-4.30085	9.2833e-05	0.00459509	UDP-Glycosyltransferase superfamily protein
AT3G07070	PBL26	-4.35897	0.000920145	0.0176351	Protein kinase superfamily protein
AT4G27290	AT4G27290	-4.40966	0.00167303	0.0247978	S-locus lectin protein kinase family protein
AT3G49160	PKP4	-4.42069	1.1988e-06	0.000388767	pyruvate kinase family protein
AT4G33070	PDC1	-4.46824	0.00269343	0.0332532	Thiamine pyrophosphate dependent pyruvate decarboxylase family protein
AT3G15700	AT3G15700	-4.53464	0.00141444	0.02256	P-loop containing nucleoside triphosphate hydrolases superfamily protein
AT1G67790	SEOC	-4.72644	1.73141e-05	0.00171568
AT3G09922	IPS1	-4.73671	0.00221952	0.0293599	induced by phosphate starvation1
AT4G14980	AT4G14980	-4.81032	0.00339401	0.0383455	Cysteine/Histidine-rich C1 domain family protein
AT3G46720	UGT76E5	-4.83994	0.00092961	0.0177062	UDP-Glycosyltransferase superfamily protein
AT5G22410	PER60	-4.86941	0.00415498	0.0433859	root hair specific 18
AT5G10040	AT5G10040	-4.92736	0.000190938	0.00700276
AT4G13420	POT5	-4.94228	2.74913e-05	0.0022668	high affinity K+ transporter 5
AT3G59370	AT3G59370	-5.03191	2.45366e-05	0.00211143	Vacuolar calcium-binding protein-related
AT2G25240	AT2G25240	-5.05854	0.000488405	0.012069	Serine protease inhibitor (SERPIN) family protein
AT3G43190	SUS4	-5.10189	0.000557956	0.0131205	sucrose synthase 4
AT2G34390	NIP2-1	-5.20771	0.00285124	0.0345107	NOD26-like intrinsic protein 2;1
AT1G11490	AT1G11490	-6.67017	0.00486783	0.0479957	zinc finger (C2H2 type) family protein
AT3G48835	AT3G48835	-6.8404	0.0010419	0.0189236
AT1G16160	WAKL5	-7.07683	0.00237628	0.030647	wall associated kinase-like 5
AT5G52690	AT5G52690	-7.24751	0.00185325	0.0261748	Copper transport protein family
AT4G10530	AT4G10530	-7.44651	0.00112582	0.0199257	Subtilase family protein
AT2G20520	FLA6	-7.47548	0.00422954	0.0437837	FASCICLIN-like arabinogalactan 6
AT2G39490	AT2G39490	-7.49582	0.00161565	0.0242839	F-box family protein
AT2G03370	AT2G03370	-7.54083	0.000392279	0.0105912	Glycosyltransferase family 61 protein
AT1G53640	AT1G53640	-7.79973	0.000565535	0.0132405
AT4G04760	AT4G04760	-7.89144	0.00394329	0.0420622	Major facilitator superfamily protein
AT3G30260	AGL79	-7.95917	0.00225667	0.0296427	AGAMOUS-like 79
AT3G50150	AT3G50150	-8.00955	0.00114725	0.020077	Plant protein of unknown function (DUF247)
AT2G04500	AT2G04500	-8.11191	0.000443046	0.0114142	Cysteine/Histidine-rich C1 domain family protein
AT1G19090	RKF2	-8.12314	0.00250418	0.0317352	receptor-like serine/threonine kinase 2
AT1G79860	ROPGEF12	-8.17855	0.00216148	0.028996	RHO guanyl-nucleotide exchange factor 12
AT3G47770	ABCA6	-8.64675	0.00355326	0.0393954	ABC2 homolog 5
AT4G25220	RHS15	-8.68966	0.000201205	0.00722815	root hair specific 15
AT1G59725	AT1G59725	-8.69379	8.32499e-05	0.00434433	DNAJ heat shock family protein
AT1G06310	ACX3.2	-8.75014	0.000292388	0.00873217	acyl-CoA oxidase 6
AT5G07450	CYCU4-2	-8.89801	0.000110621	0.00511265	cyclin p4;3
AT1G52240	ROPGEF11	-8.95273	0.00138569	0.0223601	RHO guanyl-nucleotide exchange factor 11
AT1G52790	AT1G52790	-9.12119	0.00406103	0.0427446	2-oxoglutarate (2OG) and Fe(II)-dependent oxygenase superfamily protein
AT4G28850	XTH26	-9.14988	0.00155716	0.0237902	xyloglucan endotransglucosylase/hydrolase 26
AT1G33090	DTX22	-9.15684	4.27778e-05	0.00297314	MATE efflux family protein
AT1G06120	AT1G06120	-9.21953	0.00217922	0.0290756	Fatty acid desaturase family protein
AT5G53048	AT5G53048	-9.237	0.000359245	0.0099889	other RNA
AT1G44180	AT1G44180	-9.29064	3.89871e-07	0.000223305	Peptidase M20/M25/M40 family protein
AT4G10260	AT4G10260	-9.61116	0.00326497	0.0374314	pfkB-like carbohydrate kinase family protein
AT1G05280	AT1G05280	-9.66829	1.66938e-05	0.00169985	Protein of unknown function (DUF604)
AT2G46860	PPA3	-9.84146	2.80956e-05	0.00228143	pyrophosphorylase 3
AT4G11310	RDL4	-9.8826	0.00267126	0.0330814	Papain family cysteine protease
AT1G15540	AT1G15540	-10.0468	0.00285915	0.0345661	2-oxoglutarate (2OG) and Fe(II)-dependent oxygenase superfamily protein
AT5G06900	CYP93D1	-10.7669	0.00140521	0.0224816	cytochrome P450, family 93, subfamily D, polypeptide 1
AT1G52820	AT1G52820	-13.0455	0.00369948	0.0403231	2-oxoglutarate (2OG) and Fe(II)-dependent oxygenase superfamily protein

## Sheet: Masa-0
Gene	Symbol	log2FC	p-value	FDR	Description
AT4G05235	AT4G05235	10.7735	3.50526e-06	0.00468463
AT5G49420	AT5G49420	8.004	0.000158425	0.033971	MADS-box transcription factor family protein
AT1G15640	AT1G15640	7.92861	0.000353264	0.0480125
AT5G14160	AT5G14160	7.27978	0.000335344	0.0461638	F-box family protein
AT4G37990	CAD8	5.785	6.18478e-05	0.0241923	elicitor-activated gene 3-2
AT2G29470	GSTU3	4.65332	0.000324852	0.0454543	glutathione S-transferase tau 3
AT3G21330	BHLH87	4.0046	0.000177855	0.0350652	basic helix-loop-helix (bHLH) DNA-binding superfamily protein
AT1G62760	PMEI10	3.79766	0.000174309	0.0347264	Plant invertase/pectin methylesterase inhibitor superfamily protein
AT5G18010	SAUR19	3.10429	0.000281856	0.042644	SAUR-like auxin-responsive protein family
AT1G69920	GSTU12	2.98077	0.000294483	0.0438693	glutathione S-transferase TAU 12
AT1G32960	SBT3.3	2.9064	2.47711e-05	0.0158907	Subtilase family protein
AT5G57550	XTH25	2.86989	4.05151e-06	0.00511447	xyloglucan endotransglucosylase/hydrolase 25
AT2G47190	ATMYB2	2.77423	0.000165695	0.0341484	myb domain protein 2
AT4G21830	MSRB7	2.76067	4.06721e-05	0.019766	methionine sulfoxide reductase B7
AT5G39860	PRE1	2.74418	0.000252986	0.0407765	basic helix-loop-helix (bHLH) DNA-binding family protein
AT5G13080	WRKY75	2.72768	3.31018e-06	0.00461625	WRKY DNA-binding protein 75
AT1G73260	KTI1	2.63357	0.000303151	0.0446036	kunitz trypsin inhibitor 1
AT5G18050	SAUR22	2.62944	8.15199e-05	0.0276055	SAUR-like auxin-responsive protein family
AT3G08860	PYD4	2.60578	0.000189879	0.0365976	PYRIMIDINE 4
AT2G14610	PR1	2.51336	0.000326391	0.0454543	pathogenesis-related gene 1
AT1G52400	BGLU18	2.47096	0.000228527	0.0382547	beta glucosidase 18
AT1G66700	PXMT1	2.41688	1.02855e-06	0.00225207	S-adenosyl-L-methionine-dependent methyltransferases superfamily protein
AT5G18080	SAUR24	2.39001	0.000159926	0.033971	SAUR-like auxin-responsive protein family
AT5G18030	SAUR21	2.38782	8.57132e-05	0.0280536	SAUR-like auxin-responsive protein family
AT4G16260	AT4G16260	2.3155	1.03643e-06	0.00225207	Glycosyl hydrolase superfamily protein
AT3G09960	AT3G09960	2.30533	0.000145672	0.0329104	Calcineurin-like metallo-phosphoesterase superfamily protein
AT3G10320	AT3G10320	2.28715	2.8624e-07	0.00131159	Glycosyltransferase family 61 protein
AT2G40435	AT2G40435	2.13858	0.000258789	0.0415034
AT1G74010	AT1G74010	2.13561	2.69957e-06	0.00412327	Calcium-dependent phosphotriesterase superfamily protein
AT1G13340	AT1G13340	2.11002	1.30098e-05	0.0112781	Regulator of Vps4 activity in the MVB pathway protein
AT3G63380	ACA12	2.09693	1.19752e-07	0.000768208	ATPase E1-E2 type family protein / haloacid dehalogenase-like hydrolase family protein
AT1G17020	SRG1	2.01946	0.000242062	0.0396944	senescence-related gene 1
AT1G02920	GSTF7	2.00769	0.000215205	0.0371113	glutathione S-transferase 7
AT1G04770	AT1G04770	-2.01082	2.80343e-08	0.000299733	Tetratricopeptide repeat (TPR)-like superfamily protein
AT3G57520	RFS2	-2.13974	2.10853e-05	0.0147702	seed imbibition 2
AT3G30775	POX1	-2.16584	4.4109e-06	0.00511447	Methylenetetrahydrofolate reductase family protein
AT5G51720	NEET	-2.18831	0.000222556	0.0377697	2 iron, 2 sulfur cluster binding
AT3G49160	PKP4	-2.40257	0.000142528	0.0328891	pyruvate kinase family protein
AT5G41080	GDPD2	-2.45209	0.000116093	0.0306266	PLC-like phosphodiesterases superfamily protein
AT1G02820	LEA2	-2.61125	0.000114861	0.0306266	Late embryogenesis abundant 3 (LEA3) family protein
AT4G04223	AT4G04223	-2.90424	0.00018305	0.0358008	other RNA
AT3G60950	AT3G60950	-4.79706	1.45666e-07	0.000778705	C2 calcium/lipid-binding endonuclease/exonuclease/phosphatase
AT3G62460	AT3G62460	-4.82485	1.01358e-08	0.000162554	Putative endonuclease or glycosyl hydrolase
AT3G61030	AT3G61030	-4.93011	1.32472e-06	0.00225207	Calcium-dependent lipid-binding (CaLB domain) family protein
AT2G29000	AT2G29000	-8.74229	0.000263999	0.0416116	Leucine-rich repeat protein kinase family protein
AT2G27402	AT2G27402	-8.97334	4.35951e-06	0.00511447

## Sheet: Common response
Common response to acute irradiation for all accessions							Unique response to acute irradiation for each accession
		log2FC					Bab-0				VS-0				Masa-0
Gene	Protein	Bab-0	VS-0	Masa-0	Protein name		Gene	Symbol	log2FC	Description	Gene	Symbol	log2FC	Description	Gene	Symbol	log2FC	Description
AT5G49420	AT5G49420	3.31697	8.52033	8.004	MADS-box transcription factor family protein		AT3G12230	SCPL14	10.7447	serine carboxypeptidase-like 14	AT3G60120	BGLU27	11.5983	beta glucosidase 27	AT4G05235	AT4G05235	10.7735
AT4G37990	CAD8	6.01344	4.94314	5.785	elicitor-activated gene 3-2		AT2G28680	AT2G28680	10.2085	RmlC-like cupins superfamily protein	AT1G35320	AT1G35320	10.4463		AT1G15640	AT1G15640	7.92861
AT2G29470	GSTU3	5.31418	4.86933	4.65332	glutathione S-transferase tau 3		AT1G06983	AT1G06983	10.028		AT3G25180	CYP82G1	9.75531	cytochrome P450, family 82, subfamily G, polypeptide 1	AT5G14160	AT5G14160	7.27978	F-box family protein
AT1G62760	PMEI10	6.11889	2.93245	3.79766	Plant invertase/pectin methylesterase inhibitor superfamily protein		AT3G21500	DXPS1	8.7429	1-deoxy-D-xylulose 5-phosphate synthase 1	AT5G07310	ERF115	9.65132	Integrase-type DNA-binding superfamily protein	AT3G21330	BHLH87	4.0046	basic helix-loop-helix (bHLH) DNA-binding superfamily protein
AT1G69920	GSTU12	2.70932	3.62068	2.98077	glutathione S-transferase TAU 12		AT5G28237	AT5G28237	7.59111	Pyridoxal-5'-phosphate-dependent enzyme family protein	AT4G22467	AT4G22467	8.92719		AT5G18010	SAUR19	3.10429	SAUR-like auxin-responsive protein family
AT1G32960	SBT3.3	5.24341	3.32252	2.9064	Subtilase family protein		AT1G14250	APY5	7.40619	GDA1/CD39 nucleoside phosphatase family protein	AT2G19610	AT2G19610	8.72218	RING/U-box superfamily protein	AT5G39860	PRE1	2.74418	basic helix-loop-helix (bHLH) DNA-binding family protein
AT5G57550	XTH25	4.60764	5.88886	2.86989	xyloglucan endotransglucosylase/hydrolase 25		AT5G65080	MAF5	6.92629	K-box region and MADS-box transcription factor family protein	AT1G02580	MEA	8.66988	SET domain-containing protein	AT5G18050	SAUR22	2.62944	SAUR-like auxin-responsive protein family
AT2G47190	ATMYB2	3.59332	3.00039	2.77423	myb domain protein 2		AT3G22090	AT3G22090	6.77245		AT2G01280	MEE65	8.61722	Cyclin/Brf1-like TBP-binding protein	AT1G52400	BGLU18	2.47096	beta glucosidase 18
AT4G21830	MSRB7	2.70918	4.11308	2.76067	methionine sulfoxide reductase B7		AT3G52680	AT3G52680	6.67596	F-box/RNI-like/FBD-like domains-containing protein	AT1G72840	AT1G72840	8.3683	Disease resistance protein (TIR-NBS-LRR class)	AT5G18080	SAUR24	2.39001	SAUR-like auxin-responsive protein family
AT5G13080	WRKY75	3.63009	3.06117	2.72768	WRKY DNA-binding protein 75		AT3G46658	AT3G46658	6.11762	other RNA	AT3G47030	AT3G47030	8.19359	F-box and associated interaction domains-containing protein	AT5G18030	SAUR21	2.38782	SAUR-like auxin-responsive protein family
AT1G73260	KTI1	3.20419	2.7674	2.63357	kunitz trypsin inhibitor 1		AT5G46960	PMEI12	4.98577	Plant invertase/pectin methylesterase inhibitor superfamily protein	AT1G20400	AT1G20400	8.13782	Protein of unknown function (DUF1204)	AT3G09960	AT3G09960	2.30533	Calcineurin-like metallo-phosphoesterase superfamily protein
AT3G08860	PYD4	2.59217	2.09436	2.60578	PYRIMIDINE 4		AT5G07550	GRP19	4.87011	glycine-rich protein 19	AT5G09876	AT5G09876	8.11625		AT3G57520	RFS2	-2.13974	seed imbibition 2
AT2G14610	PR1	4.68397	7.09183	2.51336	pathogenesis-related gene 1		AT1G15330	PV42A	4.49351	Cystathionine beta-synthase (CBS) protein	AT5G64790	AT5G64790	8.01306	O-Glycosyl hydrolases family 17 protein	AT3G30775	POX1	-2.16584	Methylenetetrahydrofolate reductase family protein
AT3G10320	AT3G10320	3.01297	3.00735	2.28715	Glycosyltransferase family 61 protein		AT3G60140	BGLU30	4.36931	Glycosyl hydrolase superfamily protein	AT4G35170	AT4G35170	7.76542	Late embryogenesis abundant (LEA) hydroxyproline-rich glycoprotein family	AT5G41080	GDPD2	-2.45209	PLC-like phosphodiesterases superfamily protein
AT1G74010	AT1G74010	3.20815	2.62208	2.13561	Calcium-dependent phosphotriesterase superfamily protein		AT1G21245	AT1G21245	4.12745	Protein kinase superfamily protein	AT1G75600	AT1G75600	7.68639	Histone superfamily protein	AT1G02820	LEA2	-2.61125	Late embryogenesis abundant 3 (LEA3) family protein
AT1G13340	AT1G13340	3.05351	2.62223	2.11002	Regulator of Vps4 activity in the MVB pathway protein		AT1G32350	AOX3	3.92523	alternative oxidase 1D	AT2G27650	AT2G27650	7.64425	Ubiquitin carboxyl-terminal hydrolase-related protein	AT4G04223	AT4G04223	-2.90424	other RNA
AT3G63380	ACA12	2.62052	3.33462	2.09693	ATPase E1-E2 type family protein / haloacid dehalogenase-like hydrolase family protein		AT1G61120	GES	3.85961	terpene synthase 04	AT2G25510	AT2G25510	7.55314		AT3G60950	AT3G60950	-4.79706	C2 calcium/lipid-binding endonuclease/exonuclease/phosphatase
AT1G17020	SRG1	2.29254	3.12351	2.01946	senescence-related gene 1		AT2G23110	AT2G23110	3.84009	Late embryogenesis abundant protein, group 6	AT4G34210	ASK11	7.16355	SKP1-like 11	AT3G62460	AT3G62460	-4.82485	Putative endonuclease or glycosyl hydrolase
AT1G02920	GSTF7	2.77905	2.89625	2.00769	glutathione S-transferase 7		AT2G47770	TSPO	3.63526	TSPO(outer membrane tryptophan-rich sensory protein)-related	AT3G47250	AT3G47250	6.94654	Plant protein of unknown function (DUF247)	AT3G61030	AT3G61030	-4.93011	Calcium-dependent lipid-binding (CaLB domain) family protein
AT5G51720	NEET	-2.6	-3.69	-2.18831	2 iron, 2 sulfur cluster binding		AT5G06730	PER54	3.56723	Peroxidase superfamily protein	AT1G09995	AT1G09995	6.93766	DNA repair DEAD helicase RAD3/XP-D subfamily protein	AT2G29000	AT2G29000	-8.74229	Leucine-rich repeat protein kinase family protein
							AT5G43570	AT5G43570	3.50724	Serine protease inhibitor, potato inhibitor I-type family protein	AT3G54363	AT3G54363	6.83479		AT2G27402	AT2G27402	-8.97334
							AT1G67980	CCOAMT	3.33674	caffeoyl-CoA 3-O-methyltransferase	AT3G47290	ATPLC8	6.79355	phosphatidylinositol-speciwc phospholipase C8
							AT5G44990	AT5G44990	3.3133	Glutathione S-transferase family protein	AT1G03106	AT1G03106	6.00903
Common response to acute irradiation for accessions Bab-0 and Masa-0							AT1G47890	AtRLP7	3.28946	receptor like protein 7	AT1G72852	AT1G72852	5.91815
							AT2G14620	XTH10	3.2198	xyloglucan endotransglucosylase/hydrolase 10	AT5G03204	AT5G03204	5.84165
		log2FC					AT1G66860	AT1G66860	3.18503	Class I glutamine amidotransferase-like superfamily protein	AT3G44430	AT3G44430	5.26407
Gene	Protein	Bab-0	Masa-0	Protein name			AT5G59580	UGT76E1	3.16928	UDP-glucosyl transferase 76E1	AT2G36760	UGT73C2	5.13036	UDP-glucosyl transferase 73C2
AT5G49420	AT5G49420	2.45107	2.41688	S-adenosyl-L-methionine-dependent methyltransferases superfamily protein			AT3G12910	AT3G12910	3.13962	NAC (No Apical Meristem) domain transcriptional regulator superfamily protein	AT4G22470	AT4G22470	5.11878	protease inhibitor/seed storage/lipid transfer protein (LTP) family protein
							AT2G35980	NHL10	3.11704	Late embryogenesis abundant (LEA) hydroxyproline-rich glycoprotein family	AT4G17660	PBL20	5.06174	Protein kinase superfamily protein
							AT3G45130	LAS1	3.11254	lanosterol synthase 1	AT5G61890	ERF114	5.04594	Integrase-type DNA-binding superfamily protein
							AT2G33130	RALFL18	3.09825	ralf-like 18	AT5G55150	AT5G55150	4.95316	Protein of unknown function (DUF295)
Common response to acute irradiation for accessions Bab-0 and VS-0							AT5G59220	SAG113	3.08572	highly ABA-induced PP2C gene 1	AT5G22520	AT5G22520	4.78128
							AT5G48400	GLR1.2	2.9858	Glutamate receptor family protein	AT1G61800	GPT2	4.52673	glucose-6-phosphate/phosphate translocator 2
		log2FC					AT1G08630	THA1	2.94764	threonine aldolase 1	AT5G09470	PUMP6	4.4885	dicarboxylate carrier 3
Gene	Protein	Bab-0	VS-0	Protein name			AT1G30100	NCED5	2.89006	nine-cis-epoxycarotenoid dioxygenase 5	AT1G72855	AT1G72855	4.47836	other RNA
AT1G65483	AT1G65483	10.6095	9.97302				AT3G53040	AT3G53040	2.87573	late embryogenesis abundant protein, putative / LEA protein, putative	AT5G05340	PER52	4.45241	Peroxidase superfamily protein
AT1G28650	AT1G28650	9.03813	4.50741	GDSL-like Lipase/Acylhydrolase superfamily protein			AT1G68620	CXE6	2.87279	alpha/beta-Hydrolases superfamily protein	AT5G58840	SBT4.9	4.38663	Subtilase family protein
AT2G35070	AT2G35070	8.43186	4.42032				AT5G66150	AT5G66150	2.86709	Glycosyl hydrolase family 38 protein	AT2G20800	NDB4	4.38201	NAD(P)H dehydrogenase B4
AT2G44240	AT2G44240	6.07645	5.99808	Protein of Unknown Function (DUF239)			AT1G06100	AT1G06100	2.85738	Fatty acid desaturase family protein	AT2G42170	AT2G42170	4.30106	Actin family protein
AT5G22545	AT5G22545	4.62131	4.69432				AT5G03210	AT5G03210	2.85581		AT4G15270	AT4G15270	4.14596	glucosyltransferase-related
AT3G13433	AT3G13433	4.07185	8.29907	transmembrane protein			AT3G61198	AT3G61198	2.83719	other RNA	AT1G65360	AGL23	4.1381	AGAMOUS-like 23
AT3G60966	AT3G60966	3.88198	5.07482	RING/U-box superfamily protein			AT1G61440	AT1G61440	2.82511	S-locus lectin protein kinase family protein	AT4G00130	AT4G00130	4.12316	DNA-binding storekeeper protein-related transcriptional regulator
AT2G06185	AT2G06185	3.66214	2.63901				AT4G13920	AtRLP50	2.76714	receptor like protein 50	AT4G21680	NPF7.2	4.05446	NITRATE TRANSPORTER 1.8
AT5G39520	AT5G39520	3.45414	4.33187	Protein of unknown function (DUF1997)			AT3G46230	HSP17.4A	2.76593	heat shock protein 17.4	AT5G63750	ARI13	4.04337	RING/U-box superfamily protein
AT5G57510	AT5G57510	3.44266	3.03673	cotton fiber protein			AT2G34500	CYP710A1	2.69134	cytochrome P450, family 710, subfamily A, polypeptide 1	AT4G12480	EARLI1	3.99265	Bifunctional inhibitor/lipid-transfer protein/seed storage 2S albumin superfamily protein
AT3G28580	AT3G28580	3.14735	4.30108	P-loop containing nucleoside triphosphate hydrolases superfamily protein			AT1G74080	MYB122	2.6783	myb domain protein 122	AT5G36907	AT5G36907	3.96563
AT3G54150	AT3G54150	3.13448	3.70603	S-adenosyl-L-methionine-dependent methyltransferases superfamily protein			AT3G49120	PER34	2.6769	peroxidase CB	AT3G19615	AT3G19615	3.90545
AT5G24200	AT5G24200	3.05459	2.47951	alpha/beta-Hydrolases superfamily protein			AT1G57630	AT1G57630	2.61249	Toll-Interleukin-Resistance (TIR) domain family protein	AT1G33950	IAN7	3.85604	Avirulence induced gene (AIG1) family protein
AT3G18250	AT3G18250	2.95578	3.88389	Putative membrane lipoprotein			AT3G13790	CWINV1	2.61118	Glycosyl hydrolases family 32 protein	AT2G45570	CYP76C2	3.80667	cytochrome P450, family 76, subfamily C, polypeptide 2
AT3G57700	AT3G57700	2.83361	2.98565	Protein kinase superfamily protein			AT4G23700	CHX17	2.55828	cation/H+ exchanger 17	AT1G80130	AT1G80130	3.79964	Tetratricopeptide repeat (TPR)-like superfamily protein
AT1G44130	AT1G44130	2.83159	3.68689	Eukaryotic aspartyl protease family protein			AT3G23120	AtRLP38	2.55556	receptor like protein 38	AT5G03495	AT5G03495	3.79292	RNA-binding (RRM/RBD/RNP motifs) family protein
AT4G28085	AT4G28085	2.81968	2.89948				AT2G33020	AtRLP24	2.55265	receptor like protein 24	AT4G12490	AT4G12490	3.78692	Bifunctional inhibitor/lipid-transfer protein/seed storage 2S albumin superfamily protein
AT3G13130	AT3G13130	2.80864	5.67892				AT2G19500	CKX2	2.51018	cytokinin oxidase 2	AT5G13170	SWEET15	3.66392	senescence-associated gene 29
AT1G55230	AT1G55230	2.75847	3.63015	Family of unknown function (DUF716)			AT3G23240	ERF1B	2.50694	ethylene response factor 1	AT4G35180	LHT7	3.64082	LYS/HIS transporter 7
AT5G52720	AT5G52720	2.74071	3.67501	Copper transport protein family			AT5G07650	AT5G07650	2.49104	Actin-binding FH2 protein	AT1G45616	AtRLP6	3.62629	receptor like protein 6
AT1G09380	AT1G09380	2.733	2.58218	nodulin MtN21 /EamA-like transporter family protein			AT1G59950	AT1G59950	2.47628	NAD(P)-linked oxidoreductase superfamily protein	AT1G76930	ATEXT4	3.62442	extensin 4
AT2G25297	AT2G25297	2.71	2.54927				AT4G15280	UGT71B5	2.46891	UDP-glucosyl transferase 71B5	AT5G56795	MT1B	3.60755	metallothionein 1B
AT4G39670	AT4G39670	2.70758	2.1335	Glycolipid transfer protein (GLTP) family protein			AT1G72120	NPF5.14	2.46006	Major facilitator superfamily protein	AT3G23250	MYB15	3.59274	myb domain protein 15
AT2G30550	AT2G30550	2.6981	2.58723	alpha/beta-Hydrolases superfamily protein			AT3G22600	AT3G22600	2.45998	Bifunctional inhibitor/lipid-transfer protein/seed storage 2S albumin superfamily protein	AT1G65481	AT1G65481	3.50964
AT3G15536	AT3G15536	2.4903	2.86816				AT1G02220	NAC003	2.45283	NAC domain containing protein 3	AT5G53230	AT5G53230	3.45228	Protein of unknown function (DUF295)
AT2G21510	AT2G21510	2.48044	2.05523	DNAJ heat shock N-terminal domain-containing protein			AT1G65970	PRXIIC	2.43086	thioredoxin-dependent peroxidase 2	AT4G12500	AT4G12500	3.42002	Bifunctional inhibitor/lipid-transfer protein/seed storage 2S albumin superfamily protein
AT4G40020	AT4G40020	2.4119	2.10649	Myosin heavy chain-related protein			AT2G02930	GSTF3	2.42261	glutathione S-transferase F3	AT2G29110	ATGLR2.8	3.3646	glutamate receptor 2.8
AT2G04495	AT2G04495	2.56744	3.03037				AT5G49690	UGT91C1	2.40497	UDP-Glycosyltransferase superfamily protein	AT1G13470	AT1G13470	3.31304	Protein of unknown function (DUF1262)
AT1G51890	AT1G51890	2.52574	2.78758	Leucine-rich repeat protein kinase family protein			AT4G03450	AT4G03450	2.40382	Ankyrin repeat family protein	AT4G23280	CRK20	3.30474	cysteine-rich RLK (RECEPTOR-like protein kinase) 20
AT2G01008	AT2G01008	2.63291	2.80512				AT1G52990	AT1G52990	2.40312	thioredoxin family protein	AT2G29120	GLR2.7	3.26775	glutamate receptor 2.7
AT3G13950	AT3G13950	2.60203	2.66276				AT4G23140	CRK6	2.39095	cysteine-rich RLK (RECEPTOR-like protein kinase) 6	AT1G51780	ILL5	3.23917	IAA-leucine resistant (ILR)-like gene 5
AT5G58680	AT5G58680	2.43168	2.87802	ARM repeat superfamily protein			AT2G33380	PXG3	2.37353	Caleosin-related family protein	AT5G22530	AT5G22530	3.21912
AT5G05600	AT5G05600	2.3392	2.17151	2-oxoglutarate (2OG) and Fe(II)-dependent oxygenase superfamily protein			AT1G17380	TIFY11A	2.34282	jasmonate-zim-domain protein 5	AT5G39030	AT5G39030	3.20623	Protein kinase superfamily protein
AT5G44567	AT5G44567	2.3247	2.36728				AT1G79900	BAC2	2.3047	Mitochondrial substrate carrier family protein	AT5G13320	PBS3	3.20445	Auxin-responsive GH3 family protein
AT2G32140	AT2G32140	2.11886	2.24509	transmembrane receptors			AT4G15610	AT4G15610	2.28794	Uncharacterised protein family (UPF0497)	AT3G05660	AtRLP33	3.1483	receptor like protein 33
AT3G11402	AT3G11402	2.32341	2.54016	Cysteine/Histidine-rich C1 domain family protein			AT3G11080	AtRLP35	2.27814	receptor like protein 35	AT3G25882	NIMIN-2	3.14478	NIM1-interacting 2
AT4G27480	AT4G27480	2.31735	2.50741	Core-2/I-branching beta-1,6-N-acetylglucosaminyltransferase family protein			AT5G50260	CEP1	2.26736	Cysteine proteinases superfamily protein	AT3G50930	HSR4	3.14044	cytochrome BC1 synthesis
AT3G28540	AT3G28540	2.30609	2.22346	P-loop containing nucleoside triphosphate hydrolases superfamily protein			AT1G75000	AT1G75000	2.26143	GNS1/SUR4 membrane protein family	AT1G43910	AT1G43910	3.09551	P-loop containing nucleoside triphosphate hydrolases superfamily protein
AT5G38900	AT5G38900	2.23494	2.15465	Thioredoxin superfamily protein			AT2G43000	JUB1	2.25054	NAC domain containing protein 42	AT3G50480	HR4	3.07926	homolog of RPW8 4
AT4G10860	AT4G10860	2.21813	3.48174				AT1G50040	AT1G50040	2.25013	Protein of unknown function (DUF1005)	AT1G56650	MYB75	3.07494	production of anthocyanin pigment 1
AT3G60415	AT3G60415	2.19912	2.57327				AT1G64660	MGL	2.24373	methionine gamma-lyase	AT5G64905	PEP3	3.06531	elicitor peptide 3 precursor
AT3G51660	AT3G51660	2.16441	2.536	Tautomerase/MIF superfamily protein			AT1G15040	GAT1_2.1	2.24269	Class I glutamine amidotransferase-like superfamily protein	AT1G15790	AT1G15790	3.02875
AT3G46280	AT3G46280	2.16347	2.80009	protein kinase-related			AT1G52000	JAL5	2.24222	Mannose-binding lectin superfamily protein	AT1G73805	SARD1	3.01277	Calmodulin binding protein-like
AT4G01895	AT4G01895	2.15962	2.09604	systemic acquired resistance (SAR) regulator protein NIMIN-1-related			AT1G53100	AT1G53100	2.22288	Core-2/I-branching beta-1,6-N-acetylglucosaminyltransferase family protein	AT1G02770	AT1G02770	2.99106	Protein of unknown function (DUF626)
AT4G11890	AT4G11890	2.14481	3.00869	Protein kinase superfamily protein			AT3G08870	AT3G08870	2.20668	Concanavalin A-like lectin protein kinase family protein	AT1G80160	AT1G80160	2.94962	Lactoylglutathione lyase / glyoxalase I family protein
AT3G61280	AT3G61280	2.13905	2.1939	Arabidopsis thaliana protein of unknown function (DUF821)			AT3G25020	AtRLP42	2.20144	receptor like protein 42	AT4G23680	AT4G23680	2.9292	Polyketide cyclase/dehydrase and lipid transport superfamily protein
AT4G33150	AT4G33150	2.13781	2.00842	lysine-ketoglutarate reductase/saccharopine dehydrogenase bifunctional enzyme			AT4G31230	AT4G31230	2.19617	Protein kinase protein with adenine nucleotide alpha hydrolases-like domain	AT5G59390	AT5G59390	2.89503	XH/XS domain-containing protein
AT1G24147	AT1G24147	2.13449	2.60725				AT3G26220	CYP71B3	2.19422	cytochrome P450, family 71, subfamily B, polypeptide 3	AT1G79400	CHX2	2.89487	cation/H+ exchanger 2
AT4G11170	AT4G11170	2.09011	3.67739	Disease resistance protein (TIR-NBS-LRR class) family			AT1G61810	BGLU45	2.19277	beta-glucosidase 45	AT3G28890	AtRLP43	2.88276	receptor like protein 43
AT1G61610	AT1G61610	2.05201	3.20042	S-locus lectin protein kinase family protein			AT3G25010	AtRLP41	2.17611	receptor like protein 41	AT5G25250	FLOT1	2.87925	SPFH/Band 7/PHB domain-containing membrane-associated protein family
AT3G60540	AT3G60540	2.04499	2.27046	Preprotein translocase Sec, Sec61-beta subunit protein			AT3G04070	NAC047	2.15912	NAC domain containing protein 47	AT3G09940	MDAR3	2.86089	monodehydroascorbate reductase
AT3G55970	JRG21	7.75911	3.79683	jasmonate-regulated gene 21			AT4G00690	ULP1B	2.1575	UB-like protease 1B	AT5G39670	CML46	2.8434	Calcium-binding EF-hand family protein
AT5G43650	BHLH92	6.72726	2.92511	basic helix-loop-helix (bHLH) DNA-binding superfamily protein			AT1G51860	AT1G51860	2.15727	Leucine-rich repeat protein kinase family protein	AT5G56510	APUM12	2.84248	pumilio 12
AT2G38240	ANS	5.96197	5.34143	2-oxoglutarate (2OG) and Fe(II)-dependent oxygenase superfamily protein			AT3G09520	ATEXO70H4	2.13685	exocyst subunit exo70 family protein H4	AT3G46090	ZAT7	2.83392	C2H2 and C2HC zinc fingers superfamily protein
AT2G39030	NATA1	5.90189	4.54371	Acyl-CoA N-acyltransferases (NAT) superfamily protein			AT4G11650	OSM34	2.10946	osmotin 34	AT1G57650	AT1G57650	2.83362	ATP binding
AT4G36950	MAPKKK21	4.26917	4.1905	mitogen-activated protein kinase kinase kinase 21			AT5G64510	TIN1	2.10896		AT2G23970	GGP5	2.82399	Class I glutamine amidotransferase-like superfamily protein
AT2G24850	TAT3	4.09272	3.79806	tyrosine aminotransferase 3			AT5G25910	AtRLP52	2.10723	receptor like protein 52	AT5G42380	CML37	2.81693	calmodulin like 37
AT1G69930	GSTU11	4.01476	4.10741	glutathione S-transferase TAU 11			AT5G13200	AT5G13200	2.1072	GRAM domain family protein	AT1G75750	GASA1	2.79721	GAST1 protein homolog 1
AT4G04490	CRK36	4.0048	3.89251	cysteine-rich RLK (RECEPTOR-like protein kinase) 36			AT2G38340	DREB2E	2.09329	Integrase-type DNA-binding superfamily protein	AT4G04710	CPK22	2.78327	calcium-dependent protein kinase 22
AT4G29570	CDA8	3.98487	3.53088	Cytidine/deoxycytidylate deaminase family protein			AT5G16360	AT5G16360	2.08931	NC domain-containing protein-related	AT3G50940	AT3G50940	2.766	P-loop containing nucleoside triphosphate hydrolases superfamily protein
AT5G01900	WRKY62	3.86826	4.6503	WRKY DNA-binding protein 62			AT1G65690	NHL6	2.08819	Late embryogenesis abundant (LEA) hydroxyproline-rich glycoprotein family	AT5G39580	PER62	2.74136	Peroxidase superfamily protein
AT5G59590	UGT76E2	3.86639	3.92117	UDP-glucosyl transferase 76E2			AT3G49780	PSK3	2.08293	phytosulfokine 4 precursor	AT1G35210	AT1G35210	2.73795
AT2G32660	AtRLP22	3.79304	2.39908	receptor like protein 22			AT3G28510	AT3G28510	2.08234	P-loop containing nucleoside triphosphate hydrolases superfamily protein	AT1G14520	MIOX1	2.73283	myo-inositol oxygenase 1
AT4G18980	AtS40-3	3.77218	2.84165				AT1G03850	AT1G03850	2.08074	Glutaredoxin family protein	AT4G12470	AZI1	2.73131	azelaic acid induced 1
AT4G25810	XTH23	3.7274	3.77492	xyloglucan endotransglycosylase 23			AT5G22300	NIT4	2.07796	nitrilase 4	AT2G25450	GSL-OH	2.73102	2-oxoglutarate (2OG) and Fe(II)-dependent oxygenase superfamily protein
AT3G48580	XTH11	3.69653	6.47526	xyloglucan endotransglucosylase/hydrolase 11			AT5G62150	AT5G62150	2.07143	peptidoglycan-binding LysM domain-containing protein	AT2G20142	AT2G20142	2.73021	Toll-Interleukin-Resistance (TIR) domain family protein
AT1G18830	SEC31A	3.67574	2.25869	Transducin/WD40 repeat-like superfamily protein			AT4G14640	CML8	2.06241	calmodulin 8	AT1G66090	AT1G66090	2.71662	Disease resistance protein (TIR-NBS class)
AT1G21240	WAK3	3.65362	3.05385	wall associated kinase 3			AT1G65730	YSL7	2.06145	YELLOW STRIPE like 7	AT3G02840	AT3G02840	2.67958	ARM repeat superfamily protein
AT5G14180	LIP2	3.55524	3.80043	Myzus persicae-induced lipase 1			AT3G08970	ERDJ3A	2.05873	DNAJ heat shock N-terminal domain-containing protein	AT4G39210	APL3	2.66261	Glucose-1-phosphate adenylyltransferase family protein
AT2G43570	CHI	3.4683	2.73782	chitinase, putative			AT4G11655	AT4G11655	2.05677	Uncharacterised protein family (UPF0497)	AT3G61390	PUB36	2.65855	RING/U-box superfamily protein
AT1G79680	WAKL10	3.46208	3.32089	WALL ASSOCIATED KINASE (WAK)-LIKE 10			AT2G15220	AT2G15220	2.05489	Plant basic secretory protein (BSP) family protein	AT2G28400	AT2G28400	2.65347	Protein of unknown function, DUF584
AT1G52040	MBP1	3.30243	2.36826	myrosinase-binding protein 1			AT1G68450	VQ8	2.05484	VQ motif-containing protein	AT5G52740	HIPP12	2.64788	Copper transport protein family
AT1G45145	TRX5	3.24977	2.55512	thioredoxin H-type 5			AT4G23260	CRK18	2.04226	cysteine-rich RLK (RECEPTOR-like protein kinase) 18	AT5G10760	AED1	2.6396	Eukaryotic aspartyl protease family protein
AT4G21840	MSRB8	3.24738	4.35312	methionine sulfoxide reductase B8			AT5G04390	AT5G04390	2.02833	C2H2-type zinc finger family protein	AT1G56060	AT1G56060	2.62177
AT2G25440	AtRLP20	3.2436	5.21003	receptor like protein 20			AT1G73810	AT1G73810	2.02567	Core-2/I-branching beta-1,6-N-acetylglucosaminyltransferase family protein	AT4G16563	AT4G16563	2.61964	Eukaryotic aspartyl protease family protein
AT3G26830	CYP71B15	3.18686	3.68939	Cytochrome P450 superfamily protein			AT1G70690	CRRSP2	2.02319	Receptor-like protein kinase-related family protein	AT2G25000	WRKY60	2.61131	WRKY DNA-binding protein 60
AT4G04510	CRK38	3.08527	4.54972	cysteine-rich RLK (RECEPTOR-like protein kinase) 38			AT2G45360	AT2G45360	2.01966	Protein of unknown function (DUF1442)	AT3G21080	AT3G21080	2.60878	ABC transporter-related
AT1G04580	AAO4	3.08316	4.96996	aldehyde oxidase 4			AT1G74590	GSTU10	2.01838	glutathione S-transferase TAU 10	AT1G51960	IQD27	2.59982	IQ-domain 27
AT5G53870	ENODL1	3.07936	4.45349	early nodulin-like protein 1			AT4G39030	DTX47	2.0107	MATE efflux family protein	AT5G26170	WRKY50	2.59147	WRKY DNA-binding protein 50
AT4G21120	CAT1	3.07682	2.60503	amino acid transporter 1			AT1G21390	emb2170	2.0083	embryo defective 2170	AT4G30280	XTH18	2.57315	xyloglucan endotransglucosylase/hydrolase 18
AT1G52890	NAC019	3.06074	3.24272	NAC domain containing protein 19			AT2G15080	AtRLP19	2.00731	receptor like protein 19	AT3G50570	AT3G50570	2.56333	hydroxyproline-rich glycoprotein family protein
AT5G27060	AtRLP53	3.05994	3.90333	receptor like protein 53			AT1G18140	LAC1	-2.00239	laccase 1	AT1G53625	AT1G53625	2.55436
AT1G35230	AGP5	3.04754	3.4904	arabinogalactan protein 5			AT2G35380	PER20	-2.01482	Peroxidase superfamily protein	AT3G12220	SCPL16	2.54784	serine carboxypeptidase-like 16
AT4G32810	CCD8	3.04198	2.25712	carotenoid cleavage dioxygenase 8			AT4G11320	RDL5	-2.0176	Papain family cysteine protease	AT3G06325	AT3G06325	2.54564
AT2G02580	CYP71B9	3.0401	3.0924	cytochrome P450, family 71, subfamily B, polypeptide 9			AT4G00680	ADF8	-2.02702	actin depolymerizing factor 8	AT3G10815	AT3G10815	2.54204	RING/U-box superfamily protein
AT1G19610	PDF1.4	3.00842	2.9045	Defensin-like protein 19			AT3G47360	HSD3	-2.02923	hydroxysteroid dehydrogenase 3	AT3G23630	IPT7	2.53889	isopentenyltransferase 7
AT3G44300	NIT2	2.98812	3.82567	nitrilase 2			AT1G72490	AT1G72490	-2.03957		AT5G49850	JAL46	2.51477	Mannose-binding lectin superfamily protein
AT1G68290	ENDO2	2.88078	2.79099	endonuclease 2			AT1G51830	AT1G51830	-2.04543	Leucine-rich repeat protein kinase family protein	AT3G45970	EXLA1	2.51326	expansin-like A1
AT1G28480	GRXC9	2.8499	2.90914	Thioredoxin superfamily protein			AT5G15180	PER56	-2.04595	Peroxidase superfamily protein	AT5G64120	PER71	2.50818	Peroxidase superfamily protein
AT1G60130	JAL18	2.73441	2.09494	Mannose-binding lectin superfamily protein			AT5G26300	AT5G26300	-2.05704	TRAF-like family protein	AT1G70440	SRO3	2.50782	similar to RCD one 3
AT1G30135	TIFY5A	2.7268	3.61394	jasmonate-zim-domain protein 8			AT3G21510	AHP1	-2.06484	histidine-containing phosphotransmitter 1	AT1G51920	AT1G51920	2.50675
AT5G11920	CWINV6	2.69144	3.36875	6-&1-fructan exohydrolase			AT5G06839	TGA10	-2.07047	bZIP transcription factor family protein	AT3G01830	CML40	2.49038	Calcium-binding EF-hand family protein
AT5G01380	GT-3A	2.67399	2.18861	Homeodomain-like superfamily protein			AT4G11780	AT4G11780	-2.0769		AT1G76470	AT1G76470	2.47156	NAD(P)-binding Rossmann-fold superfamily protein
AT5G11210	GLR2.5	2.64248	3.3594	glutamate receptor 2.5			AT3G44550	FAR5	-2.07913	fatty acid reductase 5	AT5G44568	AT5G44568	2.47155
AT4G37530	PER51	2.63592	3.0995	Peroxidase superfamily protein			AT3G62040	AT3G62040	-2.08363	Haloacid dehalogenase-like hydrolase (HAD) superfamily protein	AT4G23600	CORI3	2.46028	Tyrosine transaminase family protein
AT2G43510	ATTI1	2.63377	3.84554	trypsin inhibitor protein 1			AT2G48130	AT2G48130	-2.0985	Bifunctional inhibitor/lipid-transfer protein/seed storage 2S albumin superfamily protein	AT1G65610	KOR2	2.45586	Six-hairpin glycosidases superfamily protein
AT5G46350	WRKY8	2.62735	2.67904	WRKY DNA-binding protein 8			AT2G21045	HAC1	-2.10905	Rhodanese/Cell cycle control phosphatase superfamily protein	AT3G03470	CYP89A9	2.44094	cytochrome P450, family 87, subfamily A, polypeptide 9
AT5G48410	GLR1.3	2.57364	2.007	glutamate receptor 1.3			AT3G50400	AT3G50400	-2.11529	GDSL-like Lipase/Acylhydrolase superfamily protein	AT4G21380	SD18	2.43941	receptor kinase 3
AT1G01680	PUB54	2.56467	2.92082	plant U-box 54			AT5G01060	AT5G01060	-2.11531	Protein kinase protein with tetratricopeptide repeat domain	AT4G23610	AT4G23610	2.42073	Late embryogenesis abundant (LEA) hydroxyproline-rich glycoprotein family
AT1G09080	MED37B	2.51255	4.22852	Heat shock protein 70 (Hsp 70) family protein			AT4G29270	AT4G29270	-2.1161	HAD superfamily, subfamily IIIB acid phosphatase	AT5G47850	CCR4	2.41974	CRINKLY4 related 4
AT4G23150	CRK7	2.49269	2.58547	cysteine-rich RLK (RECEPTOR-like protein kinase) 7			AT4G29180	RHS16	-2.121	root hair specific 16	AT1G58225	AT1G58225	2.41547
AT5G46050	NPF5.2	2.47254	2.69668	peptide transporter 3			AT1G67150	AT1G67150	-2.12906	Plant protein of unknown function (DUF247)	AT5G51465	AT5G51465	2.40224
AT1G14880	PCR1	2.44565	3.31648	PLANT CADMIUM RESISTANCE 1			AT5G41040	HHT1	-2.13042	HXXXD-type acyl-transferase family protein	AT1G17960	AT1G17960	2.39767	Threonyl-tRNA synthetase
AT1G16420	AMC8	2.43965	3.97036	glutathione S-transferase 6			AT2G48140	EDA4	-2.13115	Bifunctional inhibitor/lipid-transfer protein/seed storage 2S albumin superfamily protein	AT2G46400	WRKY46	2.38812	WRKY DNA-binding protein 46
AT3G50770	CML41	2.43388	3.22946	metacaspase 8			AT3G12820	AtMYB10	-2.13339	myb domain protein 10	AT2G39710	AT2G39710	2.38411	Eukaryotic aspartyl protease family protein
AT3G01080	WRKY58	2.42747	2.90548	WRKY DNA-binding protein 58			AT2G43590	AT2G43590	-2.14643	Chitinase family protein	AT5G24160	SQE6	2.38208	squalene monoxygenase 6
AT1G71140	DTX14	2.41454	2.04743	MATE efflux family protein			AT3G44540	FAR4	-2.14717	fatty acid reductase 4	AT1G67520	AT1G67520	2.36877	lectin protein kinase family protein
AT3G48850	MPT2	2.41161	2.85057	phosphate transporter 3;2			AT4G26220	AT4G26220	-2.15381	S-adenosyl-L-methionine-dependent methyltransferases superfamily protein	AT1G36622	AT1G36622	2.35112
AT3G61190	BAP1	2.40126	3.14234	BON association protein 1			AT2G40370	LAC5	-2.16647	laccase 5	AT1G69870	NPF2.13	2.33049	nitrate transporter 1.7
AT3G57260	BGL2	2.3939	3.79706	beta-1,3-glucanase 2			AT2G01530	MLP329	-2.1765	MLP-like protein 329	AT3G26210	CYP71B23	2.33035	cytochrome P450, family 71, subfamily B, polypeptide 23
AT5G64890	PEP2	2.37463	2.64053	elicitor peptide 2 precursor			AT1G59780	AT1G59780	-2.18115	NB-ARC domain-containing disease resistance protein	AT1G63245	CLE14	2.32732	CLAVATA3/ESR-RELATED 14
AT3G01970	WRKY45	2.34363	2.46983	WRKY DNA-binding protein 45			AT1G78090	TPPB	-2.18168	trehalose-6-phosphate phosphatase	AT3G11340	UGT76B1	2.31648	UDP-Glycosyltransferase superfamily protein
AT4G30430	TET9	2.33579	2.98605	tetraspanin9			AT4G35160	ASMT	-2.18178	O-methyltransferase family protein	AT1G08050	AT1G08050	2.31465	Zinc finger (C3HC4-type RING finger) family protein
AT1G67000	LRK10L-2.8	2.33091	2.21819	Protein kinase superfamily protein			AT5G42500	DIR2	-2.19203	Disease resistance-responsive (dirigent-like protein) family protein	AT2G16586	AT2G16586	2.30157
AT3G28210	SAP12	2.32619	2.42082	zinc finger (AN1-like) family protein			AT5G20790	AT5G20790	-2.1933		AT2G28650	ATEXO70H8	2.29676	exocyst subunit exo70 family protein H8
AT5G25260	FLOT2	2.32409	3.88838	SPFH/Band 7/PHB domain-containing membrane-associated protein family			AT1G73270	SCPL6	-2.1942	serine carboxypeptidase-like 6	AT4G25110	AMC2	2.29619	metacaspase 2
AT3G44860	FAMT	2.30006	2.93224	farnesoic acid carboxyl-O-methyltransferase			AT2G47540	AT2G47540	-2.20537	Pollen Ole e 1 allergen and extensin family protein	AT5G25450	QCR7-2	2.2875	Cytochrome bd ubiquinol oxidase, 14kDa subunit
AT1G02930	GSTF6	2.29953	3.07923	glutathione S-transferase 6			AT4G29690	AT4G29690	-2.21499	Alkaline-phosphatase-like family protein	AT3G04720	HEL	2.28655	pathogenesis-related 4
AT4G30270	XTH24	2.29266	2.08991	xyloglucan endotransglucosylase/hydrolase 24			AT1G56630	AT1G56630	-2.24014	alpha/beta-Hydrolases superfamily protein	AT3G17690	CNGC19	2.27441	cyclic nucleotide gated channel 19
AT3G29810	COBL3	2.2926	2.35577	COBRA-like protein 2 precursor			AT5G38030	DTX30	-2.24513	MATE efflux family protein	AT2G25470	AtRLP21	2.26562	receptor like protein 21
AT3G11010	AtRLP34	2.27415	2.48439	receptor like protein 34			AT2G05440	ATGRP9	-2.25222	GLYCINE RICH PROTEIN 9	AT1G33030	AT1G33030	2.26121	O-methyltransferase family protein
AT3G22910	ACA13	2.27144	3.20039	ATPase E1-E2 type family protein / haloacid dehalogenase-like hydrolase family protein			AT1G01580	FRO2	-2.27693	ferric reduction oxidase 2	AT5G36910	THI2.2	2.26011	thionin 2.2
AT3G47480	CML47	2.25661	4.08693	Calcium-binding EF-hand family protein			AT4G29800	PLP8	-2.2773	PATATIN-like protein 8	AT1G19200	FLZ12	2.25312	Protein of unknown function (DUF581)
AT4G23160	CRK8	2.24404	2.01814	cysteine-rich RLK (RECEPTOR-like protein kinase) 8			AT4G21200	GA2OX8	-2.27999	gibberellin 2-oxidase 8	AT1G29290	CEP14	2.24204
AT1G22400	UGT85A1	2.18799	2.36344	UDP-Glycosyltransferase superfamily protein			AT5G38020	AT5G38020	-2.28379	S-adenosyl-L-methionine-dependent methyltransferases superfamily protein	AT5G01100	FRB1	2.24019	O-fucosyltransferase family protein
AT5G38250	LRK10L-2.3	2.17337	2.84192	Protein kinase family protein			AT4G33790	FAR3	-2.29878	Jojoba acyl CoA reductase-related male sterility protein	AT5G52640	HSP90-1	2.2366	heat shock protein 90.1
AT3G51450	SSL7	2.15163	2.29739	Calcium-dependent phosphotriesterase superfamily protein			AT5G10720	AHK5	-2.30234	histidine kinase 5	AT4G08870	ARGAH2	2.23646	Arginase/deacetylase superfamily protein
AT1G70140	FH8	2.14466	2.23073	formin 8			AT1G73600	AT1G73600	-2.31032	S-adenosyl-L-methionine-dependent methyltransferases superfamily protein	AT4G14370	AT4G14370	2.22413	Disease resistance protein (TIR-NBS-LRR class) family
AT1G51760	ILL4	2.11989	2.12786	peptidase M20/M25/M40 family protein			AT3G62740	BGLU7	-2.31253	beta glucosidase 7	AT1G65500	AT1G65500	2.22195
AT1G32940	SBT3.5	2.10609	2.24064	Subtilase family protein			AT4G37410	CYP81F4	-2.33352	cytochrome P450, family 81, subfamily F, polypeptide 4	AT2G32830	PHT1-5	2.20742	phosphate transporter 1;5
AT1G47510	IP5P11	2.07691	2.74395	inositol polyphosphate 5-phosphatase 11			AT5G10230	ANNAT7	-2.34195	annexin 7	AT2G18690	AT2G18690	2.20124
AT5G65600	LECRK92	2.06349	2.02978	Concanavalin A-like lectin protein kinase family protein			AT1G07560	AT1G07560	-2.35836	Leucine-rich repeat protein kinase family protein	AT2G26440	PME12	2.19122	Plant invertase/pectin methylesterase inhibitor superfamily
AT1G26420	FOX5	2.05517	2.87927	FAD-binding Berberine family protein			AT1G49210	ATL76	-2.36471	RING/U-box superfamily protein	AT4G15236	ABCG43	2.1781	ABC-2 and Plant PDR ABC-type transporter family protein
AT2G36770	UGT73C4	2.05059	2.13145	UDP-Glycosyltransferase superfamily protein			AT3G50230	AT3G50230	-2.36826	Leucine-rich repeat protein kinase family protein	AT4G14365	XBAT34	2.1637	XB3 ortholog 4 in Arabidopsis thaliana
AT2G42360	ATL41	2.03185	2.81205	RING/U-box superfamily protein			AT2G03720	MRH6	-2.37314	Adenine nucleotide alpha hydrolases-like superfamily protein	AT3G14700	AT3G14700	2.16174	SART-1 family
AT5G20230	BCB	2.02872	2.49495	blue-copper-binding protein			AT5G07475	AT5G07475	-2.37748	Cupredoxin superfamily protein	AT2G45760	BAP2	2.15934	BON association protein 2
AT4G37520	PER50	2.00533	2.6968	Peroxidase superfamily protein			AT4G12170	AT4G12170	-2.38278	Thioredoxin superfamily protein	AT5G14490	anac085	2.15913	NAC domain containing protein 85
AT5G26690	HIPP02	2.00429	3.47231	Heavy metal transport/detoxification superfamily protein			AT5G38010	UGT76E9	-2.39609	UDP-Glycosyltransferase superfamily protein	AT5G48657	AT5G48657	2.15269	defense protein-related
AT3G51440	SSL6	2.00376	2.11294	Calcium-dependent phosphotriesterase superfamily protein			AT5G38000	AT5G38000	-2.40141	Zinc-binding dehydrogenase family protein	AT3G02240	RGF7	2.13767
AT2G48080	AT2G48080	-2.02291	-2.13032	oxidoreductase, 2OG-Fe(II) oxygenase family protein			AT3G23800	SBP3	-2.40214	selenium-binding protein 3	AT5G42830	AT5G42830	2.1305	HXXXD-type acyl-transferase family protein
AT5G47635	AT5G47635	-2.02984	-2.28596	Pollen Ole e 1 allergen and extensin family protein			AT3G14940	PPC3	-2.41056	phosphoenolpyruvate carboxylase 3	AT3G22560	AT3G22560	2.12522	Acyl-CoA N-acyltransferases (NAT) superfamily protein
AT1G05260	PER3	-2.03264	-2.17227	Peroxidase superfamily protein			AT2G14920	SOT10	-2.43197	sulfotransferase 4A	AT1G23850	AT1G23850	2.12491
AT1G15210	ABCG35	-2.03286	-2.26413	pleiotropic drug resistance 7			AT1G14160	AT1G14160	-2.46885	Uncharacterised protein family (UPF0497)	AT3G56891	HIPP45	2.1166	Heavy metal transport/detoxification superfamily protein
AT2G12646	AT2G12646	-2.03484	-2.26443	PLATZ transcription factor family protein			AT2G04680	AT2G04680	-2.48327	Cysteine/Histidine-rich C1 domain family protein	AT3G51860	CAX3	2.11429	cation exchanger 3
AT2G24610	ATCNGC14	-2.04537	-2.35221	cyclic nucleotide-gated channel 14			AT5G24960	CYP71A14	-2.49	cytochrome P450, family 71, subfamily A, polypeptide 14	AT1G55390	AT1G55390	2.10506	Cysteine/Histidine-rich C1 domain family protein
AT3G44990	XTH31	-2.05143	-2.04358	xyloglucan endo-transglycosylase-related 8			AT4G19690	IRT1	-2.49383	iron-regulated transporter 1	AT2G32030	AT2G32030	2.10415	Acyl-CoA N-acyltransferases (NAT) superfamily protein
AT2G01880	PAP7	-2.05614	-2.3256	purple acid phosphatase 7			AT1G05700	AT1G05700	-2.49992	Leucine-rich repeat transmembrane protein kinase protein	AT3G13090	ABCC6	2.10134	multidrug resistance-associated protein 8
AT4G12050	AHL26	-2.05823	-2.46456	Predicted AT-hook DNA-binding family protein			AT1G51840	AT1G51840	-2.51423	protein kinase-related	AT3G02410	ICMEL2	2.09638	alpha/beta-Hydrolases superfamily protein
AT5G63660	PDF2.5	-2.06495	-2.07449	Defensin-like protein 6			AT5G62165	AGL42	-2.51667	AGAMOUS-like 42	AT5G52760	HIPP14	2.08823	Copper transport protein family
AT3G02550	LBD41	-2.07496	-2.84413	LOB domain-containing protein 41			AT1G23410	RPS27AA	-2.51913	Ribosomal protein S27a / Ubiquitin family protein	AT1G10550	XTH33	2.08294	xyloglucan:xyloglucosyl transferase 33
AT1G18100	MFT	-2.08034	-2.80627	PEBP (phosphatidylethanolamine-binding protein) family protein			AT4G25310	AT4G25310	-2.52223	2-oxoglutarate (2OG) and Fe(II)-dependent oxygenase superfamily protein	AT3G28340	GATL10	2.08012	galacturonosyltransferase-like 10
AT5G14690	AT5G14690	-2.0837	-2.29716				AT1G16440	RHS3	-2.55783	root hair specific 3	AT2G34930	AT2G34930	2.07927	disease resistance family protein / LRR family protein
AT2G17850	AT2G17850	-2.08576	-2.87377	Rhodanese/Cell cycle control phosphatase superfamily protein			AT2G43880	AT2G43880	-2.56297	Pectin lyase-like superfamily protein	AT3G21230	4CL4	2.07087	4-coumarate:CoA ligase 5
AT4G22235	AT4G22235	-2.09893	-2.11367	Arabidopsis defensin-like protein			AT2G42660	AT2G42660	-2.56599	Homeodomain-like superfamily protein	AT2G42370	AT2G42370	2.07086
AT5G17820	AT5G17820	-2.16139	-2.40045	Peroxidase superfamily protein			AT5G49350	AT5G49350	-2.58492	Glycine-rich protein family	AT4G31800	WRKY18	2.06969	WRKY DNA-binding protein 18
AT4G11290	PER39	-2.1705	-2.28586	Peroxidase superfamily protein			AT2G01520	MLP328	-2.6312	MLP-like protein 328	AT2G38250	GT-3B	2.05907	Homeodomain-like superfamily protein
AT5G58860	CYP86A1	-2.17167	-2.02871	cytochrome P450, family 86, subfamily A, polypeptide 1			AT4G12280	AT4G12280	-2.64026	copper amine oxidase family protein	AT5G13490	AAC2	2.05191	ADP/ATP carrier 2
AT2G47460	MYB12	-2.17992	-2.08944	myb domain protein 12			AT1G70450	AT1G70450	-2.65517	Protein kinase superfamily protein	AT5G58670	PLC1	2.02849	phospholipase C1
AT5G66985	AT5G66985	-2.18007	-3.21307				AT1G48500	TIFY6A	-2.65668	jasmonate-zim-domain protein 4	AT5G38780	AT5G38780	2.02055	S-adenosyl-L-methionine-dependent methyltransferases superfamily protein
AT3G59370	AT3G59370	-2.18976	-5.03191	Vacuolar calcium-binding protein-related			AT4G20240	CYP71A27	-2.66354	cytochrome P450, family 71, subfamily A, polypeptide 27	AT4G23210	CRK13	2.01538	cysteine-rich RLK (RECEPTOR-like protein kinase) 13
AT2G14820	NPY2	-2.19233	-2.99746	Phototropic-responsive NPH3 family protein			AT3G27884	AT3G27884	-2.66997	other RNA	AT5G10380	ATL55	2.01231	RING/U-box superfamily protein
AT1G68850	PER11	-2.19471	-2.00304	Peroxidase superfamily protein			AT5G37990	AT5G37990	-2.69786	S-adenosyl-L-methionine-dependent methyltransferases superfamily protein	AT5G05300	AT5G05300	2.0095
AT5G48940	RCH1	-2.21062	-2.74895	Leucine-rich repeat transmembrane protein kinase family protein			AT3G61410	AT3G61410	-2.69875		AT1G65484	AT1G65484	2.00551
AT5G42630	KAN4	-2.21218	-2.02614	Homeodomain-like superfamily protein			AT4G15290	CSLB5	-2.73353	Cellulose synthase family protein	AT3G12580	MED37C	2.00286	heat shock protein 70
AT3G60490	ERF035	-2.21546	-2.30618	Integrase-type DNA-binding superfamily protein			AT1G78990	AT1G78990	-2.77194	HXXXD-type acyl-transferase family protein	AT3G46080	ZAT8	2.00176	C2H2-type zinc finger family protein
AT5G20150	SPX1	-2.24014	-2.02059	SPX domain gene 1			AT2G02630	AT2G02630	-2.77375	Cysteine/Histidine-rich C1 domain family protein	AT5G48070	XTH20	-2.00551	xyloglucan endotransglucosylase/hydrolase 20
AT2G23050	NPY4	-2.24463	-2.73033	Phototropic-responsive NPH3 family protein			AT2G18620	AT2G18620	-2.80558	Terpenoid synthases superfamily protein	AT3G52720	ACA1	-2.00646	alpha carbonic anhydrase 1
AT2G29750	UGT71C1	-2.24497	-2.41875	UDP-glucosyl transferase 71C1			AT3G57157	AT3G57157	-2.81908	other RNA	AT2G32510	MAPKKK17	-2.01322	mitogen-activated protein kinase kinase kinase 17
AT5G19410	AT5G19410	-2.24614	-2.01034	ABC-2 type transporter family protein			AT1G31950	AT1G31950	-2.82645	Terpenoid cyclases/Protein prenyltransferases superfamily protein	AT5G66690	UGT72E2	-2.01469	UDP-Glycosyltransferase superfamily protein
AT2G25810	TIP4-1	-2.2558	-2.52447	tonoplast intrinsic protein 4;1			AT4G22610	AT4G22610	-2.86821	Bifunctional inhibitor/lipid-transfer protein/seed storage 2S albumin superfamily protein	AT5G44870	LAZ5	-2.02797	Disease resistance protein (TIR-NBS-LRR class) family
AT1G77530	AT1G77530	-2.25947	-2.37339	O-methyltransferase family protein			AT4G19820	AT4G19820	-2.89701	Glycosyl hydrolase family protein with chitinase insertion domain	AT2G32990	AtGH9B8	-2.03433	glycosyl hydrolase 9B8
AT5G09520	PELPK2	-2.27451	-2.25251	hydroxyproline-rich glycoprotein family protein			AT1G80340	GA3OX2	-3.00172	gibberellin 3-oxidase 2	AT5G20830	SUS1	-2.04094	sucrose synthase 1
AT1G49860	GSTF14	-2.27485	-2.48663	glutathione S-transferase (class phi) 14			AT4G31940	CYP82C4	-3.01857	cytochrome P450, family 82, subfamily C, polypeptide 4	AT1G64360	AT1G64360	-2.04854
AT1G73330	ATDR4	-2.27627	-2.27899	drought-repressed 4			AT3G01260	AT3G01260	-3.12635	Galactose mutarotase-like superfamily protein	AT1G44970	PER9	-2.0502	Peroxidase superfamily protein
AT1G74500	PRE3	-2.27889	-2.85104	activation-tagged BRI1(brassinosteroid-insensitive 1)-suppressor 1			AT3G09160	AT3G09160	-3.39491	RNA-binding (RRM/RBD/RNP motifs) family protein	AT3G63440	CKX6	-2.05131	cytokinin oxidase/dehydrogenase 6
AT4G19030	NIP1-1	-2.29546	-3.68168	NOD26-like major intrinsic protein 1			AT5G37950	AT5G37950	-3.42221	UDP-Glycosyltransferase superfamily protein	AT1G04610	YUC3	-2.05181	YUCCA 3
AT3G60280	UCC3	-2.30177	-3.72249	uclacyanin 3			AT4G01630	EXPA17	-3.42325	expansin A17	AT5G48485	DIR1	-2.05636	Bifunctional inhibitor/lipid-transfer protein/seed storage 2S albumin superfamily protein
AT3G01190	PER27	-2.30246	-2.04753	Peroxidase superfamily protein			AT3G46880	AT3G46880	-3.68259		AT5G44550	AT5G44550	-2.06353	Uncharacterised protein family (UPF0497)
AT2G30210	LAC3	-2.31963	-2.7081	laccase 3			AT3G54310	AT3G54310	-4.05287		AT1G63450	GT16	-2.06933	root hair specific 8
AT2G25980	JAL20	-2.31986	-3.0038	Mannose-binding lectin superfamily protein			AT5G51500	PME60	-4.30989	Plant invertase/pectin methylesterase inhibitor superfamily	AT1G80760	NIP6-1	-2.07285	NOD26-like intrinsic protein 6;1
AT1G56320	AT1G56320	-2.33391	-2.21325				AT5G52170	HDG7	-4.36423	homeodomain GLABROUS 7	AT5G37690	AT5G37690	-2.07333	SGNH hydrolase-type esterase superfamily protein
AT4G13280	TPS12	-2.34932	-2.64706	terpenoid synthase 12			AT2G22590	UGT91A1	-4.57578	UDP-Glycosyltransferase superfamily protein	AT4G05200	CRK25	-2.07715	cysteine-rich RLK (RECEPTOR-like protein kinase) 25
AT5G58750	AT5G58750	-2.36065	-4.03893	NAD(P)-binding Rossmann-fold superfamily protein			AT4G01970	AtSTS	-5.89797	stachyose synthase	AT3G03530	NPC4	-2.08989	non-specific phospholipase C4
AT3G24240	RCH2	-2.37121	-2.2616	Leucine-rich repeat receptor-like protein kinase family protein			AT5G37210	AT5G37210	-7.0255	Cysteine/Histidine-rich C1 domain family protein	AT5G44578	AT5G44578	-2.10083
AT3G54770	ARP1	-2.3812	-2.30337	RNA-binding (RRM/RBD/RNP motifs) family protein			AT3G01202	AT3G01202	-7.37149	other RNA	AT1G29720	RFK1	-2.10108	Leucine-rich repeat transmembrane protein kinase
AT2G30340	LBD13	-2.39106	-2.24662	LOB domain-containing protein 13			AT4G26330	UNE17	-7.41582	Subtilisin-like serine endopeptidase family protein	AT4G36610	AT4G36610	-2.10523	alpha/beta-Hydrolases superfamily protein
AT5G51060	RBOHC	-2.41389	-2.44124	NADPH/respiratory burst oxidase protein D			AT4G00210	LBD31	-7.51241	LOB domain-containing protein 31	AT1G63930	ROH1	-2.10594	from the Czech 'roh' meaning 'corner'
AT3G15240	AT3G15240	-2.42463	-2.74168	Serine/threonine-protein kinase WNK (With No Lysine)-related			AT5G37820	NIP4	-7.71905	NOD26-like intrinsic protein 4;2	AT2G16060	AHB1	-2.10642	hemoglobin 1
AT5G13580	ABCG6	-2.4318	-2.10515	ABC-2 type transporter family protein			AT5G09978	PEP7	-8.22546	elicitor peptide 7 precursor	AT1G66725	MIR163	-2.11225	MIR163; miRNA
AT1G77120	ADH1	-2.46134	-2.76354	alcohol dehydrogenase 1			AT3G58060	MTPC3	-8.25619	Cation efflux family protein	AT5G39150	AT5G39150	-2.11545	RmlC-like cupins superfamily protein
AT3G50300	AT3G50300	-2.47532	-2.12301	HXXXD-type acyl-transferase family protein			AT4G19770	AT4G19770	-8.3789	Glycosyl hydrolase family protein with chitinase insertion domain	AT1G07260	UGT71C3	-2.11636	UDP-glucosyl transferase 71C3
AT2G44110	MLO15	-2.48419	-3.14902	Seven transmembrane MLO family protein			AT1G05660	AT1G05660	-8.48732	Pectin lyase-like superfamily protein	AT5G26290	AT5G26290	-2.11945	TRAF-like family protein
AT1G23720	AT1G23720	-2.48767	-2.20788	Proline-rich extensin-like family protein			AT1G33280	BRN1	-9.32734	NAC domain containing protein 15	AT2G22240	IPS2	-2.12288	myo-inositol-1-phosphate synthase 2
AT3G11430	GPAT5	-2.49714	-2.1082	glycerol-3-phosphate acyltransferase 5			AT4G27852	AT4G27852	2.58771		AT1G26790	AT1G26790	-2.1239	Dof-type zinc finger DNA-binding family protein
AT1G14240	APY3	-2.50214	-2.22735	GDA1/CD39 nucleoside phosphatase family protein							AT1G66800	AT1G66800	-2.12541	NAD(P)-binding Rossmann-fold superfamily protein
AT4G15160	AT4G15160	-2.51862	-2.43173	Bifunctional inhibitor/lipid-transfer protein/seed storage 2S albumin superfamily protein							AT1G61230	AT1G61230	-2.12557	Mannose-binding lectin superfamily protein
AT3G20380	AT3G20380	-2.52446	-2.46855	TRAF-like family protein							AT5G19650	OFP8	-2.12866	ovate family protein 8
AT1G54970	PRP1	-2.55582	-2.8079	proline-rich protein 1							AT5G09480	AT5G09480	-2.13172	hydroxyproline-rich glycoprotein family protein
AT1G05240	PER2	-2.55606	-2.65954	Peroxidase superfamily protein							AT1G01750	ADF11	-2.15136	actin depolymerizing factor 11
AT1G74460	AT1G74460	-2.55955	-2.45846	GDSL-like Lipase/Acylhydrolase superfamily protein							AT4G30110	HMA2	-2.15346	heavy metal atpase 2
AT5G58910	LAC16	-2.57016	-2.46925	laccase 16							AT4G21990	APR3	-2.16184	APS reductase 3
AT2G19590	ACO1	-2.58177	-3.0103	ACC oxidase 1							AT1G08590	PXL1	-2.16968	Leucine-rich receptor-like protein kinase family protein
AT1G26250	AT1G26250	-2.66535	-3.53143	Proline-rich extensin-like family protein							AT4G31470	AT4G31470	-2.17748	CAP (Cysteine-rich secretory proteins, Antigen 5, and Pathogenesis-related 1 protein) superfamily protein
AT5G19520	MSL9	-2.69553	-2.76357	mechanosensitive channel of small conductance-like 9							AT4G21760	BGLU47	-2.17828	beta-glucosidase 47
AT2G30130	LBD12	-2.70611	-2.77253	Lateral organ boundaries (LOB) domain family protein							AT2G38380	PER22	-2.18501	Peroxidase superfamily protein
AT4G31320	AT4G31320	-2.71926	-2.81041	SAUR-like auxin-responsive protein family							AT1G43650	AT1G43650	-2.1888	nodulin MtN21 /EamA-like transporter family protein
AT1G33750	TPS22	-2.72089	-4.04796	Terpenoid cyclases/Protein prenyltransferases superfamily protein							AT3G21680	AT3G21680	-2.20136
AT1G12740	CYP87A2	-2.72522	-3.03423	cytochrome P450, family 87, subfamily A, polypeptide 2							AT4G02850	AT4G02850	-2.20621	phenazine biosynthesis PhzC/PhzF family protein
AT3G45070	AT3G45070	-2.73185	-2.85598	P-loop containing nucleoside triphosphate hydrolases superfamily protein							AT5G49120	FLZ15	-2.20782	Protein of unknown function (DUF581)
AT4G08400	AT4G08400	-2.7723	-2.43613	Proline-rich extensin-like family protein							AT3G15050	IQD10	-2.20903	IQ-domain 10
AT3G24300	AMT1-3	-2.78005	-2.25618	ammonium transporter 1;3							AT3G51895	SULTR3	-2.20954	sulfate transporter 3;1
AT5G36180	SCPL1	-2.82395	-2.0756	serine carboxypeptidase-like 1							AT4G17280	AT4G17280	-2.21533	Auxin-responsive family protein
AT3G46270	AT3G46270	-2.85172	-3.61365	receptor protein kinase-related							AT1G54540	AT1G54540	-2.22236	Late embryogenesis abundant (LEA) hydroxyproline-rich glycoprotein family
AT1G19900	AT1G19900	-2.8604	-2.39994	glyoxal oxidase-related protein							AT5G67060	HEC1	-2.22757	basic helix-loop-helix (bHLH) DNA-binding superfamily protein
AT3G13784	CWINV5	-2.86602	-3.79177	cell wall invertase 5							AT4G00070	AT4G00070	-2.22874	RING/U-box superfamily protein
AT1G78815	LSH7	-2.91041	-2.83316	Protein of unknown function (DUF640)							AT1G76650	CML38	-2.22952	calmodulin-like 38
AT4G14060	AT4G14060	-2.91443	-2.65823	Polyketide cyclase/dehydrase and lipid transport superfamily protein							AT3G55580	AT3G55580	-2.22996	Regulator of chromosome condensation (RCC1) family protein
AT5G10040	AT5G10040	-2.92053	-4.92736								AT3G25790	HHO1	-2.23037	myb-like transcription factor family protein
AT1G12010	AT1G12010	-2.96244	-2.80707	2-oxoglutarate (2OG) and Fe(II)-dependent oxygenase superfamily protein							AT4G13890	SHM5	-2.23059	Pyridoxal phosphate (PLP)-dependent transferases superfamily protein
AT4G12270	AT4G12270	-2.96859	-2.05378	Copper amine oxidase family protein							AT1G76952	IDL5	-2.23062	inflorescence deficient in abscission (IDA)-like 5
AT3G61680	PLIP1	-3.01789	-2.46785	alpha/beta-Hydrolases superfamily protein							AT3G10040	AT3G10040	-2.23184	sequence-specific DNA binding transcription factors
AT5G42785	AT5G42785	-3.08424	-2.87725								AT5G20860	AT5G20860	-2.25497	Plant invertase/pectin methylesterase inhibitor superfamily
AT4G11880	AGL14	-3.12343	-2.82014	AGAMOUS-like 14							AT5G36260	AT5G36260	-2.26531	Eukaryotic aspartyl protease family protein
AT4G11610	AT4G11610	-3.15612	-3.08468	C2 calcium/lipid-binding plant phosphoribosyltransferase family protein							AT3G48340	CEP2	-2.27294	Cysteine proteinases superfamily protein
AT5G46900	AT5G46900	-3.27773	-3.58934	Bifunctional inhibitor/lipid-transfer protein/seed storage 2S albumin superfamily protein							AT5G15120	PCO1	-2.27554	Protein of unknown function (DUF1637)
AT5G14650	AT5G14650	-3.42398	-3.57915	Pectin lyase-like superfamily protein							AT5G25810	TINY	-2.29708	Integrase-type DNA-binding superfamily protein
AT1G77520	AT1G77520	-3.55363	-2.24703	O-methyltransferase family protein							AT1G08670	AT1G08670	-2.31392	ENTH/VHS family protein
AT5G26310	UGT72E3	-3.78061	-3.38474	UDP-Glycosyltransferase superfamily protein							AT4G28650	MIK1	-2.31521	Leucine-rich repeat transmembrane protein kinase family protein
											AT1G27140	GSTU14	-2.32238	glutathione S-transferase tau 14
											AT1G33540	SCPL18	-2.33464	serine carboxypeptidase-like 18
Common response to acute irradiation for population Masany and population Vygrebnaya Sloboda (without common response for all populations)											AT5G24660	LSU2	-2.33549	response to low sulfur 2
											AT3G03270	AT3G03270	-2.34355	Adenine nucleotide alpha hydrolases-like superfamily protein
		log2FC									AT4G12520	AT4G12520	-2.35651	Bifunctional inhibitor/lipid-transfer protein/seed storage 2S albumin superfamily protein
Gene	Protein	Vygrebnaya Sloboda	Masany	Protein name							AT5G13990	ATEXO70C2	-2.35892	exocyst subunit exo70 family protein C2
AT4G16260	AT4G16260	2.40971	2.3155	Glycosyl hydrolase superfamily protein							AT3G45680	NPF2.3	-2.36554	Major facilitator superfamily protein
AT2G40435	AT2G40435	2.84006	2.13858								AT1G20700	WOX14	-2.37534	WUSCHEL related homeobox 14
AT1G04770	SDI2	-2.76515	-2.01082	Tetratricopeptide repeat (TPR)-like superfamily protein							AT5G06090	GPAT7	-2.38132	glycerol-3-phosphate acyltransferase 7
AT3G49160	PKP4	-4.42069	-2.40257	pyruvate kinase family protein							AT3G20460	AT3G20460	-2.38169	Major facilitator superfamily protein
											AT5G24100	AT5G24100	-2.38723	Leucine-rich repeat protein kinase family protein
											AT5G15960	KIN1	-2.38794	stress-responsive protein (KIN1) / stress-induced protein (KIN1)
											AT4G12510	AT4G12510	-2.3905	Bifunctional inhibitor/lipid-transfer protein/seed storage 2S albumin superfamily protein
											AT1G07490	RTFL3	-2.39162	ROTUNDIFOLIA like 3
											AT5G40510	AT5G40510	-2.40166	Sucrase/ferredoxin-like family protein
											AT2G05180	CYP705A6	-2.4104	cytochrome P450, family 705, subfamily A, polypeptide 6
											AT5G43530	RAD5B	-2.42303	Helicase protein with RING/U-box domain
											AT3G29670	PMAT2	-2.4248	HXXXD-type acyl-transferase family protein
											AT5G23990	ATFRO5	-2.42709	ferric reduction oxidase 5
											AT1G66270	BGLU21	-2.44396	Glycosyl hydrolase superfamily protein
											AT1G22220	AT1G22220	-2.45969	F-box family protein
											AT5G39180	AT5G39180	-2.4606	RmlC-like cupins superfamily protein
											AT1G68940	AT1G68940	-2.49335	Armadillo/beta-catenin-like repeat family protein
											AT5G39120	AT5G39120	-2.50185	RmlC-like cupins superfamily protein
											AT4G39675	AT4G39675	-2.51884
											AT3G21180	ACA9	-2.53075	autoinhibited Ca(2+)-ATPase 9
											AT2G47520	ERF071	-2.53169	Integrase-type DNA-binding superfamily protein
											AT4G02290	AtGH9B13	-2.5432	glycosyl hydrolase 9B13
											AT2G40130	SMXL8	-2.54856	Double Clp-N motif-containing P-loop nucleoside triphosphate hydrolases superfamily protein
											AT1G53270	ABCG10	-2.55171	ABC-2 type transporter family protein
											AT5G45920	AT5G45920	-2.55831	SGNH hydrolase-type esterase superfamily protein
											AT5G66280	GMD1	-2.58275	GDP-D-mannose 4,6-dehydratase 1
											AT1G18420	ALMT3	-2.59223	Aluminium activated malate transporter family protein
											AT2G15370	FUT5	-2.59782	fucosyltransferase 5
											AT1G74890	ARR15	-2.6078	response regulator 15
											AT4G22666	AT4G22666	-2.61188	Bifunctional inhibitor/lipid-transfer protein/seed storage 2S albumin superfamily protein
											AT1G48100	AT1G48100	-2.61473	Pectin lyase-like superfamily protein
											AT2G20750	EXPB1	-2.62412	expansin B1
											AT5G62210	AT5G62210	-2.64598	Embryo-specific protein 3, (ATS3)
											AT1G80240	AT1G80240	-2.64637	Protein of unknown function, DUF642
											AT5G05880	UGT76C4	-2.65151	UDP-Glycosyltransferase superfamily protein
											AT1G05250	PER2	-2.65954	Peroxidase superfamily protein
											AT1G48510	AT1G48510	-2.65974	Surfeit locus 1 cytochrome c oxidase biogenesis protein
											AT5G49270	COBL9	-2.66245	COBRA-like extracellular glycosyl-phosphatidyl inositol-anchored protein family
											AT1G22150	SULTR1	-2.66721	sulfate transporter 1;3
											AT1G04660	AT1G04660	-2.69202	glycine-rich protein
											AT3G44070	AT3G44070	-2.69497	Glycosyl hydrolase family 35 protein
											AT3G44510	AT3G44510	-2.69602	alpha/beta-Hydrolases superfamily protein
											AT5G26200	AT5G26200	-2.69629	Mitochondrial substrate carrier family protein
											AT1G13610	AT1G13610	-2.74107	alpha/beta-Hydrolases superfamily protein
											AT5G60520	AT5G60520	-2.76229	Late embryogenesis abundant (LEA) protein-related
											AT5G26220	GGCT2	-2.76486	ChaC-like family protein
											AT3G26200	CYP71B22	-2.80357	cytochrome P450, family 71, subfamily B, polypeptide 22
											AT5G19790	RAP2-11	-2.81323	related to AP2 11
											AT1G02810	PME7	-2.82929	Plant invertase/pectin methylesterase inhibitor superfamily
											AT5G16530	PIN5	-2.84241	Auxin efflux carrier family protein
											AT3G08490	AT3G08490	-2.84529
											AT3G05155	AT3G05155	-2.85689	Major facilitator superfamily protein
											AT1G67105	AT1G67105	-2.86878	other RNA
											AT2G18150	PER15	-2.87005	Peroxidase superfamily protein
											AT5G57090	PIN2	-2.87116	Auxin efflux carrier family protein
											AT5G48850	SDI1	-2.87218	Tetratricopeptide repeat (TPR)-like superfamily protein
											AT5G42510	DIR1	-2.05636	Disease resistance-responsive (dirigent-like protein) family protein
											AT5G38540	AT5G38540	-2.94342	Mannose-binding lectin superfamily protein
											AT3G24210	AT3G24210	-2.96095	Ankyrin repeat family protein
											AT3G49570	LSU3	-2.9928	response to low sulfur 3
											AT4G16270	PER40	-3.00618	Peroxidase superfamily protein
											AT4G10270	AT4G10270	-3.00768	Wound-responsive family protein
											AT4G19980	AT4G19980	-3.04884
											AT5G39890	PCO2	-3.05655	Protein of unknown function (DUF1637)
											AT5G62310	IRE	-3.10111	AGC (cAMP-dependent, cGMP-dependent and protein kinase C) kinase family protein
											AT3G59850	AT3G59850	-3.11065	Pectin lyase-like superfamily protein
											AT2G39040	PER24	-3.12232	Peroxidase superfamily protein
											AT3G21620	AT3G21620	-3.14245	ERD (early-responsive to dehydration stress) family protein
											AT5G03545	AT4	-3.15429
											AT3G43850	AT3G43850	-3.16369
											AT5G25390	SHN3	-3.16402	Integrase-type DNA-binding superfamily protein
											AT1G66470	BHLH83	-3.19333	ROOT HAIR DEFECTIVE6
											AT5G57530	XTH12	-3.21845	xyloglucan endotransglucosylase/hydrolase 12
											AT1G70260	AT1G70260	-3.22533	nodulin MtN21 /EamA-like transporter family protein
											AT1G79580	SMB	-3.23351	NAC (No Apical Meristem) domain transcriptional regulator superfamily protein
											AT5G14150	AT5G14150	-3.30756	Protein of unknown function, DUF642
											AT4G23496	SP1L5	-3.30923	SPIRAL1-like5
											AT5G01600	FER1	-3.40018	ferretin 1
											AT3G50640	AT3G50640	-3.45545
											AT5G20450	AT5G20450	-3.46164
											AT3G01840	LYK2	-3.5047	Protein kinase superfamily protein
											AT3G47720	SRO4	-3.50983	similar to RCD one 4
											AT4G37682	AT4G37682	-3.56307	Protein of unknown function (DUF1399)
											AT3G07970	QRT2	-3.56485	Pectin lyase-like superfamily protein
											AT1G12805	AT1G12805	-3.62549	nucleotide binding
											AT5G45200	AT5G45200	-3.63476	Disease resistance protein (TIR-NBS-LRR class) family
											AT2G39510	AT2G39510	-3.63489	nodulin MtN21 /EamA-like transporter family protein
											AT5G10130	DFC	-3.66327	Pollen Ole e 1 allergen and extensin family protein
											AT2G47530	AT2G47530	-3.73809	Pollen Ole e 1 allergen and extensin family protein
											AT1G43800	S-ACP-DES6	-3.75932	Plant stearoyl-acyl-carrier-protein desaturase family protein
											AT2G14510	AT2G14510	-3.79244	Leucine-rich repeat protein kinase family protein
											AT2G33350	AT2G33350	-3.85205	CCT motif family protein
											AT4G10640	IQD16	-3.87049	IQ-domain 16
											AT5G15720	GLIP7	-3.94179	GDSL-motif lipase 7
											AT5G24880	AT5G24880	-3.96951
											AT4G10265	AT4G10265	-4.09377	Wound-responsive family protein
											AT4G23340	AT4G23340	-4.11751	2-oxoglutarate (2OG) and Fe(II)-dependent oxygenase superfamily protein
											AT2G31920	AT2G31920	-4.1552	Plant protein of unknown function (DUF936)
											AT1G23110	AT1G23110	-4.19703
											AT2G19970	AT2G19970	-4.2033	CAP (Cysteine-rich secretory proteins, Antigen 5, and Pathogenesis-related 1 protein) superfamily protein
											AT4G22110	AT4G22110	-4.20658	GroES-like zinc-binding dehydrogenase family protein
											AT2G25160	CYP82F1	-4.24344	cytochrome P450, family 82, subfamily F, polypeptide 1
											AT1G50580	UGT79B5	-4.30085	UDP-Glycosyltransferase superfamily protein
											AT3G07070	PBL26	-4.35897	Protein kinase superfamily protein
											AT4G27290	AT4G27290	-4.40966	S-locus lectin protein kinase family protein
											AT4G33070	PDC1	-4.46824	Thiamine pyrophosphate dependent pyruvate decarboxylase family protein
											AT3G15700	AT3G15700	-4.53464	P-loop containing nucleoside triphosphate hydrolases superfamily protein
											AT1G67790	SEOC	-4.72644
											AT3G09922	IPS1	-4.73671	induced by phosphate starvation1
											AT4G14980	AT4G14980	-4.81032	Cysteine/Histidine-rich C1 domain family protein
											AT3G46720	UGT76E5	-4.83994	UDP-Glycosyltransferase superfamily protein
											AT5G22410	PER60	-4.86941	root hair specific 18
											AT4G13420	POT5	-4.94228	high affinity K+ transporter 5
											AT2G25240	AT2G25240	-5.05854	Serine protease inhibitor (SERPIN) family protein
											AT3G43190	SUS4	-5.10189	sucrose synthase 4
											AT2G34390	NIP2-1	-5.20771	NOD26-like intrinsic protein 2;1
											AT1G11490	AT1G11490	-6.67017	zinc finger (C2H2 type) family protein
											AT3G48835	AT3G48835	-6.8404
											AT1G16160	WAKL5	-7.07683	wall associated kinase-like 5
											AT5G52690	AT5G52690	-7.24751	Copper transport protein family
											AT4G10530	AT4G10530	-7.44651	Subtilase family protein
											AT2G20520	FLA6	-7.47548	FASCICLIN-like arabinogalactan 6
											AT2G39490	AT2G39490	-7.49582	F-box family protein
											AT2G03370	AT2G03370	-7.54083	Glycosyltransferase family 61 protein
											AT1G53640	AT1G53640	-7.79973
											AT4G04760	AT4G04760	-7.89144	Major facilitator superfamily protein
											AT3G30260	AGL79	-7.95917	AGAMOUS-like 79
											AT3G50150	AT3G50150	-8.00955	Plant protein of unknown function (DUF247)
											AT2G04500	AT2G04500	-8.11191	Cysteine/Histidine-rich C1 domain family protein
											AT1G19090	RKF2	-8.12314	receptor-like serine/threonine kinase 2
											AT1G79860	ROPGEF12	-8.17855	RHO guanyl-nucleotide exchange factor 12
											AT3G47770	ABCA6	-8.64675	ABC2 homolog 5
											AT4G25220	RHS15	-8.68966	root hair specific 15
											AT1G59725	AT1G59725	-8.69379	DNAJ heat shock family protein
											AT1G06310	ACX3.2	-8.75014	acyl-CoA oxidase 6
											AT5G07450	CYCU4-2	-8.89801	cyclin p4;3
											AT1G52240	ROPGEF11	-8.95273	RHO guanyl-nucleotide exchange factor 11
											AT1G52790	AT1G52790	-9.12119	2-oxoglutarate (2OG) and Fe(II)-dependent oxygenase superfamily protein
											AT4G28850	XTH26	-9.14988	xyloglucan endotransglucosylase/hydrolase 26
											AT1G33090	DTX22	-9.15684	MATE efflux family protein
											AT1G06120	AT1G06120	-9.21953	Fatty acid desaturase family protein
											AT5G53048	AT5G53048	-9.237	other RNA
											AT1G44180	AT1G44180	-9.29064	Peptidase M20/M25/M40 family protein
											AT4G10260	AT4G10260	-9.61116	pfkB-like carbohydrate kinase family protein
											AT1G05280	AT1G05280	-9.66829	Protein of unknown function (DUF604)
											AT2G46860	PPA3	-9.84146	pyrophosphorylase 3
											AT4G11310	RDL4	-9.8826	Papain family cysteine protease
											AT1G15540	AT1G15540	-10.0468	2-oxoglutarate (2OG) and Fe(II)-dependent oxygenase superfamily protein
											AT5G06900	CYP93D1	-10.7669	cytochrome P450, family 93, subfamily D, polypeptide 1
											AT1G52820	AT1G52820	-13.0455	2-oxoglutarate (2OG) and Fe(II)-dependent oxygenase superfamily protein
