# Supplementary material for: Arabidopsis thaliana Accessions from the Chernobyl Exclusion Zone Show Decreased Sensitivity to Additional Acute Irradiation
Source: Plants (Basel). 2022 Nov 17;11(22):3142. doi: 10.3390/plants11223142 (PMC9697804; doi:10.3390/plants11223142)
Supplement: Supplementary file 1 [file plants-11-03142-s001.zip › Table S6.xlsx]

## Sheet: General
Table S6. Functional enrichment GO analysis for additionally gamma-irradiated A. thaliana seedlings

## Sheet: Bab-0
Functional enrichment for upregulated genes
GO term	Type of term	Description	p-value	Entries
GO:0006950	Biological Process	response to stress	1.4e-20	// AT5G46050 // AT1G64660 // AT3G46230 // AT2G33380 // AT4G21840 // AT5G46350 // AT1G19610 // AT4G23260 // AT4G23140 // AT3G11080 // AT2G44240 // AT1G30100 // AT5G65600 // AT2G39030 // AT5G25910 // AT3G28580 // AT4G03450 // AT3G57260 // AT2G43000 // AT4G21830 // AT1G45145 // AT4G23150 // AT5G57510 // AT1G57630 // AT3G13790 // AT4G01895 // AT5G65080 // AT1G30135 // AT2G24850 // AT1G16420 // AT4G11…
GO:0006952	Biological Process	defense response	2e-19	// AT5G03210 // AT5G46050 // AT1G30135 // AT5G01900 // AT3G23120 // AT1G51890 // AT5G65600 // AT3G49120 // AT2G33380 // AT5G14180 // AT5G27060 // AT1G47890 // AT5G46350 // AT2G35980 // AT2G15220 // AT3G01080 // AT2G14610 // AT5G38900 // AT4G23160 // AT3G25020 // AT1G19610 // AT4G23260 // AT2G15080 // AT4G11170 // AT2G32660 // AT4G23140 // AT3G11080 // AT3G11010 // AT4G39030 // AT4G11890 // AT1G02…
GO:0050896	Biological Process	response to stimulus	5.6e-16	// AT5G46050 // AT1G64660 // AT3G46230 // AT2G33380 // AT4G21840 // AT5G46350 // AT1G19610 // AT4G23260 // AT4G23140 // AT3G11080 // AT2G44240 // AT1G30100 // AT5G65600 // AT2G39030 // AT5G43570 // AT3G28580 // AT4G03450 // AT3G57260 // AT2G25440 // AT2G43000 // AT4G21830 // AT3G60140 // AT1G45145 // AT4G23150 // AT5G57510 // AT1G57630 // AT3G13790 // AT4G01895 // AT1G28480 // AT5G65080 // AT1G30…
GO:0051704	Biological Process	multi-organism process	2.3e-12	// AT5G03210 // AT5G46050 // AT3G49120 // AT3G54150 // AT5G65600 // AT5G01900 // AT2G35070 // AT1G61440 // AT5G14180 // AT3G44300 // AT5G46350 // AT2G35980 // AT2G14610 // AT1G61610 // AT1G51890 // AT3G08970 // AT1G19610 // AT4G23260 // AT4G23160 // AT3G51440 // AT1G61120 // AT4G23140 // AT1G79680 // AT4G39030 // AT4G11890 // AT1G02930 // AT4G11650 // AT5G20230 // AT5G38900 // AT5G25910 // AT3G57…
GO:0051707	Biological Process	response to other organism	2.6e-12	// AT5G03210 // AT5G46050 // AT3G49120 // AT5G65600 // AT5G01900 // AT2G33380 // AT5G14180 // AT3G44300 // AT5G46350 // AT2G35980 // AT2G14610 // AT1G51890 // AT1G19610 // AT4G23260 // AT4G23160 // AT3G51440 // AT1G61120 // AT4G23140 // AT4G39030 // AT1G02930 // AT4G11650 // AT5G20230 // AT5G38900 // AT5G25910 // AT3G57260 // AT1G32960 // AT1G79680 // AT1G73260 // AT1G70690 // AT3G26830 // AT2G02…
GO:0043207	Biological Process	response to external biotic stimulus	2.6e-12	// AT5G03210 // AT5G46050 // AT3G49120 // AT5G65600 // AT5G01900 // AT2G33380 // AT5G14180 // AT3G44300 // AT5G46350 // AT2G35980 // AT2G14610 // AT1G51890 // AT1G19610 // AT4G23260 // AT4G23160 // AT3G51440 // AT1G61120 // AT4G23140 // AT4G39030 // AT1G02930 // AT4G11650 // AT5G20230 // AT5G38900 // AT5G25910 // AT3G57260 // AT1G32960 // AT1G79680 // AT1G73260 // AT1G70690 // AT3G26830 // AT2G02…
GO:0009607	Biological Process	response to biotic stimulus	6.9e-12	// AT5G03210 // AT5G46050 // AT3G49120 // AT5G65600 // AT5G01900 // AT2G33380 // AT5G14180 // AT3G44300 // AT5G46350 // AT2G35980 // AT2G14610 // AT1G51890 // AT1G19610 // AT4G23260 // AT4G23160 // AT3G51440 // AT1G61120 // AT4G23140 // AT4G39030 // AT1G02930 // AT4G11650 // AT5G20230 // AT5G38900 // AT5G25910 // AT3G57260 // AT1G32960 // AT1G79680 // AT1G73260 // AT1G70690 // AT3G26830 // AT2G02…
GO:0009605	Biological Process	response to external stimulus	2.1e-11	// AT5G03210 // AT5G46050 // AT1G64660 // AT5G01900 // AT5G65600 // AT3G49120 // AT2G33380 // AT5G14180 // AT3G44300 // AT5G46350 // AT2G35980 // AT2G14610 // AT1G51890 // AT1G19610 // AT4G23260 // AT4G23160 // AT2G47190 // AT1G61120 // AT4G23140 // AT3G51440 // AT4G39030 // AT4G11890 // AT1G02930 // AT4G11650 // AT5G20230 // AT5G38900 // AT5G25910 // AT3G57260 // AT1G32960 // AT5G13080 // AT1G79…
GO:0098542	Biological Process	defense response to other organism	8.8e-11	// AT5G03210 // AT5G46050 // AT3G49120 // AT5G65600 // AT5G01900 // AT2G33380 // AT5G14180 // AT5G46350 // AT2G35980 // AT2G14610 // AT1G51890 // AT1G19610 // AT4G23260 // AT4G23160 // AT1G70690 // AT4G23140 // AT4G39030 // AT1G02930 // AT4G11650 // AT5G20230 // AT5G38900 // AT5G25910 // AT3G57260 // AT1G32960 // AT1G73260 // AT3G26830 // AT2G02930 // AT2G43510 // AT1G45145 // AT4G23150 // AT2G43…
GO:0001101	Biological Process	response to acid chemical	1.3e-08	// AT5G46050 // AT1G64660 // AT5G01900 // AT2G24850 // AT5G59220 // AT1G30135 // AT2G33380 // AT5G46350 // AT3G28210 // AT2G14610 // AT4G04490 // AT1G65690 // AT1G47510 // AT4G23260 // AT4G11170 // AT2G47190 // AT1G61120 // AT1G17380 // AT2G47770 // AT3G51440 // AT4G39030 // AT1G02930 // AT1G30100 // AT2G39030 // AT3G28580 // AT4G03450 // AT1G79680 // AT3G61190 // AT1G73260 // AT5G13200 // AT3G26…
GO:1901700	Biological Process	response to oxygen-containing compound	2e-08	// AT5G46050 // AT1G64660 // AT5G01900 // AT2G24850 // AT1G16420 // AT5G59220 // AT1G30135 // AT2G33380 // AT5G46350 // AT3G28210 // AT2G14610 // AT4G04490 // AT1G65690 // AT1G47510 // AT4G23260 // AT4G11170 // AT2G47190 // AT1G61120 // AT4G23140 // AT2G47770 // AT3G51440 // AT1G17380 // AT4G39030 // AT1G02930 // AT1G30100 // AT2G39030 // AT5G25910 // AT3G28580 // AT4G03450 // AT1G79680 // AT3G61…
GO:0042221	Biological Process	response to chemical	2.6e-08	// AT5G46050 // AT1G64660 // AT2G29470 // AT5G01900 // AT1G69920 // AT2G24850 // AT1G15330 // AT1G16420 // AT5G59220 // AT1G30135 // AT2G33380 // AT3G44300 // AT3G49120 // AT5G46350 // AT3G28210 // AT2G14610 // AT4G04490 // AT1G65690 // AT1G47510 // AT4G23260 // AT4G14640 // AT4G11170 // AT2G47190 // AT1G61120 // AT4G23140 // AT2G47770 // AT3G51440 // AT1G17380 // AT4G39030 // AT1G02930 // AT5G05…
GO:0009617	Biological Process	response to bacterium	3.9e-07	// AT1G70690 // AT5G46050 // AT3G49120 // AT5G01900 // AT1G51890 // AT4G23150 // AT4G11650 // AT4G23260 // AT4G37990 // AT4G23160 // AT1G32960 // AT1G61120 // AT3G44300 // AT1G73260 // AT4G23140 // AT1G79680 // AT5G46350 // AT4G39030 // AT1G02920 // AT1G02930 // AT3G26830
GO:0044699	Biological Process	single-organism process	5.1e-07	// AT1G64660 // AT5G65600 // AT2G33380 // AT4G21120 // AT4G21840 // AT3G45130 // AT1G28650 // AT2G34500 // AT1G61610 // AT5G28237 // AT1G08630 // AT1G06100 // AT3G11080 // AT3G26220 // AT4G29570 // AT5G05600 // AT1G30100 // AT2G32660 // AT2G39030 // AT5G25910 // AT4G03450 // AT2G25440 // AT2G43000 // AT4G21830 // AT3G60140 // AT2G30550 // AT1G45145 // AT1G57630 // AT1G28480 // AT5G27060 // AT1G30…
GO:0009404	Biological Process	toxin metabolic process	1.7e-06	// AT2G02930 // AT1G02930 // AT2G29470 // AT1G74590 // AT1G69930 // AT1G69920 // AT1G02920 // AT2G43000 // AT3G26830
GO:0006979	Biological Process	response to oxidative stress	2.5e-06	// AT4G21830 // AT3G49120 // AT5G20230 // AT2G44240 // AT1G45145 // AT4G23150 // AT3G28580 // AT1G13340 // AT1G61120 // AT4G37520 // AT4G11170 // AT4G21840 // AT1G03850 // AT1G73260 // AT4G23140 // AT5G46350 // AT5G06730 // AT1G16420 // AT1G02930 // AT4G37530
GO:0009636	Biological Process	response to toxic substance	9.5e-06	// AT5G05600 // AT2G29470 // AT2G02930 // AT1G45145 // AT1G74590 // AT1G69930 // AT1G69920 // AT5G22300 // AT1G02920 // AT1G02930
GO:0009611	Biological Process	response to wounding	2.5e-05	// AT5G46050 // AT1G30135 // AT5G20230 // AT2G24850 // AT5G43570 // AT1G17380 // AT3G13790 // AT3G51450 // AT3G51440 // AT3G61190 // AT1G73260 // AT1G61120 // AT1G51760
GO:0042742	Biological Process	defense response to bacterium	4e-05	// AT1G70690 // AT5G46050 // AT3G49120 // AT5G01900 // AT1G51890 // AT4G23150 // AT4G11650 // AT4G23260 // AT4G23160 // AT1G32960 // AT1G73260 // AT4G23140 // AT5G46350 // AT4G39030 // AT1G02920 // AT1G02930
GO:0090487	Biological Process	secondary metabolite catabolic process	4.4e-05	// AT2G02930 // AT2G29470 // AT1G02920 // AT1G69930 // AT1G69920 // AT1G74590 // AT1G02930
GO:0009407	Biological Process	toxin catabolic process	4.4e-05	// AT2G02930 // AT2G29470 // AT1G02920 // AT1G69930 // AT1G69920 // AT1G74590 // AT1G02930
GO:0002376	Biological Process	immune system process	5.8e-05	// AT5G03210 // AT2G43570 // AT4G11650 // AT2G14610 // AT5G38900 // AT3G49120 // AT3G57260 // AT4G37990 // AT1G32960 // AT5G64890 // AT4G01895 // AT5G46350 // AT4G39030 // AT1G02920 // AT2G35980 // AT3G26830
GO:0009620	Biological Process	response to fungus	6.4e-05	// AT2G02930 // AT4G11650 // AT2G43510 // AT5G20230 // AT5G38900 // AT1G45145 // AT1G19610 // AT3G49120 // AT2G33380 // AT3G51450 // AT3G51440 // AT1G79680 // AT1G73260 // AT5G25910 // AT5G50260 // AT5G46350 // AT4G11890 // AT1G02920 // AT1G03850 // AT3G26830
GO:0009751	Biological Process	response to salicylic acid	8.3e-05	// AT5G46050 // AT5G01900 // AT4G03450 // AT2G33380 // AT3G51450 // AT2G47190 // AT1G79680 // AT1G73260 // AT3G51440 // AT4G39030 // AT1G28480 // AT3G61190
GO:0044710	Biological Process	single-organism metabolic process	9.7e-05	// AT1G64660 // AT1G08630 // AT1G66860 // AT2G24850 // AT1G04580 // AT1G53100 // AT1G52990 // AT4G27480 // AT1G69920 // AT3G49120 // AT2G33380 // AT2G19500 // AT5G14180 // AT1G61810 // AT4G21840 // AT3G45130 // AT3G21500 // AT1G28650 // AT2G29470 // AT2G34500 // AT5G24200 // AT4G33150 // AT1G65690 // AT5G28237 // AT1G47510 // AT1G65970 // AT1G67980 // AT1G06100 // AT3G26220 // AT4G39030 // AT1G02…
GO:0019748	Biological Process	secondary metabolic process	0.00011	// AT2G02930 // AT1G69920 // AT1G02930 // AT5G20230 // AT1G04580 // AT1G65690 // AT2G29470 // AT4G37990 // AT1G61810 // AT1G74590 // AT3G12230 // AT1G69930 // AT1G67980 // AT3G26220 // AT2G02580 // AT1G02920 // AT2G43000 // AT3G26830
GO:0009753	Biological Process	response to jasmonic acid	0.00015	// AT5G46050 // AT1G30135 // AT2G14610 // AT2G24850 // AT2G39030 // AT1G47510 // AT3G23240 // AT3G51440 // AT1G61120 // AT1G17380 // AT3G51450 // AT1G28480
GO:0009628	Biological Process	response to abiotic stimulus	0.00023	// AT5G46050 // AT1G64660 // AT2G38340 // AT1G16420 // AT3G46230 // AT5G59220 // AT4G11650 // AT2G33380 // AT5G65080 // AT3G49120 // AT5G46350 // AT2G14610 // AT4G33150 // AT3G08970 // AT1G65690 // AT1G47510 // AT5G11210 // AT2G47190 // AT2G47770 // AT5G48400 // AT1G02930 // AT4G37530 // AT5G05600 // AT1G30100 // AT5G20230 // AT3G48850 // AT3G57260 // AT1G79900 // AT3G61190 // AT1G73260 // AT2G43…
GO:0014070	Biological Process	response to organic cyclic compound	0.0006	// AT5G46050 // AT5G01900 // AT2G14610 // AT4G03450 // AT2G33380 // AT4G30270 // AT2G43570 // AT3G51450 // AT2G47190 // AT1G79680 // AT1G73260 // AT3G51440 // AT4G39030 // AT1G28480 // AT3G61190
GO:0045087	Biological Process	innate immune response	0.00097	// AT2G43570 // AT3G49120 // AT2G14610 // AT5G38900 // AT4G11650 // AT3G57260 // AT4G37990 // AT1G32960 // AT5G64890 // AT4G01895 // AT4G39030 // AT1G02920 // AT3G26830
GO:0010033	Biological Process	response to organic substance	0.0011	// AT5G46050 // AT1G30135 // AT5G01900 // AT2G24850 // AT3G49120 // AT2G33380 // AT5G46350 // AT3G28210 // AT2G14610 // AT4G04490 // AT1G65690 // AT1G47510 // AT4G23260 // AT3G23240 // AT2G47190 // AT1G61120 // AT1G17380 // AT2G47770 // AT3G51440 // AT4G39030 // AT5G59220 // AT2G39030 // AT5G25910 // AT3G28580 // AT4G03450 // AT1G79680 // AT3G61190 // AT1G73260 // AT5G13200 // AT3G26830 // AT4G32…
GO:0006955	Biological Process	immune response	0.0012	// AT2G43570 // AT3G49120 // AT2G14610 // AT5G38900 // AT4G11650 // AT3G57260 // AT4G37990 // AT1G32960 // AT5G64890 // AT4G01895 // AT4G39030 // AT1G02920 // AT3G26830
GO:0044763	Biological Process	single-organism cellular process	0.0015	// AT1G64660 // AT5G65600 // AT2G33380 // AT3G45130 // AT1G61610 // AT5G28237 // AT1G08630 // AT1G06100 // AT3G11080 // AT4G29570 // AT1G30100 // AT2G32660 // AT2G39030 // AT5G25910 // AT4G03450 // AT2G25440 // AT2G43000 // AT1G45145 // AT1G57630 // AT1G28480 // AT1G30135 // AT1G69920 // AT2G24850 // AT1G16420 // AT1G66860 // AT3G08970 // AT4G11170 // AT2G47190 // AT1G67980 // AT4G39030 // AT1G47…
GO:0010035	Biological Process	response to inorganic substance	0.0016	// AT1G64660 // AT1G16420 // AT1G30100 // AT2G33380 // AT3G44300 // AT5G46350 // AT2G14610 // AT4G14640 // AT4G11170 // AT2G47190 // AT1G61120 // AT1G02930 // AT5G59220 // AT3G28580 // AT1G73260 // AT3G26830 // AT4G21830 // AT1G52890 // AT1G45145 // AT2G38340 // AT2G43570 // AT4G11890 // AT1G02920
GO:0050832	Biological Process	defense response to fungus	0.0016	// AT2G02930 // AT4G11650 // AT2G43510 // AT5G20230 // AT5G38900 // AT1G45145 // AT1G19610 // AT3G49120 // AT2G33380 // AT5G25910 // AT5G50260 // AT5G46350 // AT4G11890 // AT1G02920 // AT1G03850 // AT3G26830
GO:0000302	Biological Process	response to reactive oxygen species	0.0018	// AT4G21830 // AT1G61120 // AT4G23150 // AT3G28580 // AT4G23140 // AT4G11170 // AT1G73260 // AT1G16420 // AT5G46350
GO:0009814	Biological Process	defense response, incompatible interaction	0.0021	// AT4G11650 // AT2G14610 // AT5G38900 // AT3G57260 // AT2G43570 // AT5G64890 // AT4G01895 // AT1G02920 // AT3G26830
GO:0007568	Biological Process	aging	0.0024	// AT5G59220 // AT3G60140 // AT4G30270 // AT2G43570 // AT2G43000 // AT4G30430 // AT1G17020 // AT2G35980 // AT4G18980
GO:0031347	Biological Process	regulation of defense response	0.0041	// AT1G30135 // AT3G01080 // AT4G11890 // AT4G03450 // AT3G49120 // AT3G61190 // AT1G17380 // AT4G01895 // AT4G39030 // AT3G26830
GO:0044403	Biological Process	symbiosis, encompassing mutualism through parasitism	0.005	// AT5G03210 // AT3G49120 // AT1G70690 // AT2G43570 // AT3G51450 // AT3G51440 // AT5G46350 // AT2G35980
GO:0044419	Biological Process	interspecies interaction between organisms	0.0055	// AT5G03210 // AT3G49120 // AT1G70690 // AT2G43570 // AT3G51450 // AT3G51440 // AT5G46350 // AT2G35980
GO:0006970	Biological Process	response to osmotic stress	0.0058	// AT5G46050 // AT4G11650 // AT2G38340 // AT1G65690 // AT1G47510 // AT3G48850 // AT2G33380 // AT1G79900 // AT2G47190 // AT1G02930 // AT1G73260 // AT2G47770 // AT5G46350 // AT4G11890 // AT1G02920 // AT2G43000 // AT4G37530
GO:0009737	Biological Process	response to abscisic acid	0.006	// AT5G46050 // AT5G59220 // AT2G38340 // AT4G04490 // AT1G65690 // AT3G28580 // AT1G47510 // AT4G23260 // AT2G47190 // AT2G33380 // AT2G47770 // AT5G46350 // AT4G11890 // AT3G28210 // AT5G13200 // AT3G26830
GO:0044036	Biological Process	cell wall macromolecule metabolic process	0.0061	// AT4G25810 // AT5G57550 // AT3G29810 // AT2G14620 // AT3G48580 // AT4G30270 // AT2G43570 // AT5G62150
GO:0009615	Biological Process	response to virus	0.0063	// AT5G03210 // AT2G43570 // AT3G51450 // AT3G51440 // AT5G46350 // AT2G35980
GO:0097305	Biological Process	response to alcohol	0.0063	// AT5G46050 // AT5G59220 // AT2G38340 // AT4G04490 // AT1G65690 // AT3G28580 // AT1G47510 // AT4G23260 // AT2G47190 // AT2G33380 // AT2G47770 // AT5G46350 // AT4G11890 // AT3G28210 // AT5G13200 // AT3G26830
GO:0010411	Biological Process	xyloglucan metabolic process	0.0088	// AT4G30270 // AT4G25810 // AT5G57550 // AT2G14620 // AT3G48580
GO:0009719	Biological Process	response to endogenous stimulus	0.0088	// AT5G46050 // AT1G30135 // AT2G24850 // AT3G49120 // AT2G33380 // AT5G46350 // AT3G28210 // AT2G14610 // AT4G04490 // AT1G65690 // AT1G47510 // AT4G23260 // AT3G23240 // AT2G47190 // AT1G61120 // AT1G17380 // AT2G47770 // AT3G51440 // AT5G59220 // AT2G39030 // AT5G25910 // AT3G28580 // AT5G13200 // AT3G26830 // AT4G32810 // AT2G38340 // AT4G30270 // AT2G43570 // AT3G51450 // AT1G03850 // AT4G11…
GO:0080134	Biological Process	regulation of response to stress	0.0088	// AT1G30135 // AT3G01080 // AT4G11890 // AT4G03450 // AT3G49120 // AT3G61190 // AT1G17380 // AT4G01895 // AT5G46350 // AT4G39030 // AT3G26830
GO:0016032	Biological Process	viral process	0.0095	// AT5G03210 // AT1G70690 // AT2G43570 // AT3G51450 // AT3G51440 // AT5G46350 // AT2G35980
GO:0009725	Biological Process	response to hormone	0.014	// AT5G46050 // AT1G30135 // AT2G24850 // AT3G49120 // AT2G33380 // AT5G46350 // AT3G28210 // AT2G14610 // AT4G04490 // AT1G65690 // AT1G47510 // AT4G23260 // AT3G23240 // AT2G47190 // AT1G61120 // AT1G17380 // AT2G47770 // AT3G51440 // AT5G59220 // AT2G39030 // AT3G28580 // AT5G13200 // AT3G26830 // AT4G32810 // AT2G38340 // AT4G30270 // AT3G51450 // AT1G03850 // AT4G11890 // AT1G28480
GO:0009651	Biological Process	response to salt stress	0.014	// AT5G46050 // AT4G11650 // AT2G38340 // AT1G47510 // AT3G48850 // AT2G33380 // AT2G47190 // AT1G02930 // AT1G73260 // AT2G47770 // AT5G46350 // AT4G11890 // AT1G02920 // AT2G43000 // AT4G37530
GO:0009627	Biological Process	systemic acquired resistance	0.016	// AT4G01895 // AT2G43570 // AT2G14610 // AT3G57260 // AT3G26830
GO:0044712	Biological Process	single-organism catabolic process	0.016	// AT4G29570 // AT2G02930 // AT1G64660 // AT4G32810 // AT4G33150 // AT1G08630 // AT2G30550 // AT1G74590 // AT5G14180 // AT1G69930 // AT1G69920 // AT1G28650 // AT2G29470 // AT1G02920 // AT1G02930
GO:0009414	Biological Process	response to water deprivation	0.017	// AT1G64660 // AT2G14610 // AT1G52890 // AT2G38340 // AT5G59220 // AT1G30100 // AT2G33380 // AT2G47190 // AT4G11890 // AT1G02930 // AT3G26830
GO:0008152	Biological Process	metabolic process	0.017	// AT1G64660 // AT4G04510 // AT5G65600 // AT2G33380 // AT4G21840 // AT3G45130 // AT5G62150 // AT1G28650 // AT5G46350 // AT5G43650 // AT2G34500 // AT4G25810 // AT4G15280 // AT5G28237 // AT1G08630 // AT4G23260 // AT4G23140 // AT3G26220 // AT5G49420 // AT3G46280 // AT5G01380 // AT5G05600 // AT1G30100 // AT2G39030 // AT5G11920 // AT1G32940 // AT3G57260 // AT1G67000 // AT2G43000 // AT4G21830 // AT3G60…
GO:0009415	Biological Process	response to water	0.019	// AT1G64660 // AT2G14610 // AT1G52890 // AT2G38340 // AT5G59220 // AT1G30100 // AT2G33380 // AT2G47190 // AT4G11890 // AT1G02930 // AT3G26830
GO:0044764	Biological Process	multi-organism cellular process	0.023	// AT5G03210 // AT1G70690 // AT2G43570 // AT3G51450 // AT3G51440 // AT5G46350 // AT2G35980
GO:0010150	Biological Process	leaf senescence	0.024	// AT5G59220 // AT4G18980 // AT2G43570 // AT2G35980 // AT2G43000 // AT1G17020
GO:0010260	Biological Process	organ senescence	0.024	// AT5G59220 // AT4G18980 // AT2G43570 // AT2G35980 // AT2G43000 // AT1G17020
GO:0055114	Biological Process	oxidation-reduction process	0.027	// AT3G49120 // AT1G04580 // AT1G59950 // AT2G33380 // AT4G21840 // AT2G34500 // AT2G19500 // AT1G65970 // AT1G06100 // AT3G26220 // AT4G37530 // AT5G05600 // AT1G30100 // AT5G20230 // AT3G26830 // AT4G21830 // AT1G26420 // AT4G32810 // AT1G45145 // AT2G02580 // AT4G37990 // AT4G37520 // AT1G32350 // AT3G55970 // AT1G17020 // AT2G38240 // AT5G06730 // AT1G28480
GO:0010383	Biological Process	cell wall polysaccharide metabolic process	0.027	// AT4G25810 // AT5G57550 // AT3G29810 // AT2G14620 // AT3G48580 // AT4G30270
GO:0048583	Biological Process	regulation of response to stimulus	0.029	// AT1G30135 // AT3G01080 // AT4G11890 // AT3G61190 // AT4G03450 // AT5G59220 // AT3G49120 // AT5G13080 // AT5G65080 // AT1G17380 // AT4G01895 // AT5G46350 // AT4G39030 // AT3G26830
GO:0033993	Biological Process	response to lipid	0.032	// AT5G46050 // AT5G59220 // AT2G38340 // AT4G04490 // AT1G65690 // AT3G28580 // AT1G47510 // AT4G23260 // AT4G30270 // AT2G47190 // AT2G33380 // AT2G47770 // AT5G46350 // AT4G11890 // AT3G28210 // AT5G13200 // AT3G26830
GO:0044248	Biological Process	cellular catabolic process	0.049	// AT4G29570 // AT2G02930 // AT1G64660 // AT4G32810 // AT1G69920 // AT4G33150 // AT1G68290 // AT3G49120 // AT1G74590 // AT4G37520 // AT1G08630 // AT2G43570 // AT1G69930 // AT5G62150 // AT5G50260 // AT2G29470 // AT5G06730 // AT1G02920 // AT1G02930 // AT4G37530
GO:0003824	Molecular Function	catalytic activity	5.4e-09	// AT1G64660 // AT4G04510 // AT5G65600 // AT2G33380 // AT3G28540 // AT4G21840 // AT3G45130 // AT1G28650 // AT2G34500 // AT4G25810 // AT1G61610 // AT4G15280 // AT5G28237 // AT1G08630 // AT4G23260 // AT4G23140 // AT3G11080 // AT3G26220 // AT3G46280 // AT4G29570 // AT5G05600 // AT1G30100 // AT2G32660 // AT2G39030 // AT5G11920 // AT1G32940 // AT3G28580 // AT3G57260 // AT2G25440 // AT1G67000 // AT4G21…
GO:0016740	Molecular Function	transferase activity	1.1e-06	// AT3G54150 // AT1G64660 // AT4G04510 // AT1G66860 // AT2G24850 // AT1G53100 // AT4G27480 // AT5G65600 // AT1G69920 // AT4G13920 // AT5G59580 // AT1G67000 // AT1G01680 // AT3G57700 // AT3G21500 // AT2G42360 // AT5G49690 // AT4G36950 // AT3G11010 // AT5G44990 // AT4G25810 // AT1G61610 // AT4G15280 // AT4G04490 // AT4G23160 // AT2G29470 // AT4G23260 // AT3G08870 // AT2G15080 // AT1G67980 // AT4G23…
GO:0004364	Molecular Function	glutathione transferase activity	0.00026	// AT2G02930 // AT2G29470 // AT1G02920 // AT1G69930 // AT1G69920 // AT1G74590 // AT1G02930
GO:0016301	Molecular Function	kinase activity	0.00035	// AT4G04510 // AT5G65600 // AT4G13920 // AT1G67000 // AT5G27060 // AT4G36950 // AT3G11010 // AT1G61610 // AT1G51890 // AT4G04490 // AT4G23160 // AT4G23260 // AT3G08870 // AT2G15080 // AT2G32660 // AT1G21240 // AT3G11080 // AT5G38250 // AT3G46280 // AT1G47890 // AT5G25910 // AT1G51860 // AT4G23140 // AT1G79680 // AT2G25440 // AT2G33020 // AT3G23120 // AT3G25010 // AT4G23150 // AT1G61440 // AT4G31…
GO:0016762	Molecular Function	xyloglucan:xyloglucosyl transferase activity	0.0022	// AT4G30270 // AT4G25810 // AT5G57550 // AT2G14620 // AT3G48580
GO:0030246	Molecular Function	carbohydrate binding	0.0033	// AT1G60130 // AT1G61610 // AT1G52040 // AT5G65600 // AT1G61440 // AT3G57260 // AT3G08870 // AT1G52000 // AT1G79680 // AT1G21240 // AT5G66150 // AT5G38250
GO:0016772	Molecular Function	transferase activity, transferring phosphorus-containing groups	0.0034	// AT4G04510 // AT5G65600 // AT4G13920 // AT1G67000 // AT5G27060 // AT4G36950 // AT3G11010 // AT1G61610 // AT1G51890 // AT4G04490 // AT4G23160 // AT4G23260 // AT3G08870 // AT2G15080 // AT2G32660 // AT1G21240 // AT3G11080 // AT5G38250 // AT3G46280 // AT1G47890 // AT5G25910 // AT1G51860 // AT4G23140 // AT1G79680 // AT2G25440 // AT2G33020 // AT3G23120 // AT3G25010 // AT4G23150 // AT1G61440 // AT4G31…
GO:0016765	Molecular Function	transferase activity, transferring alkyl or aryl (other than methyl) groups	0.0039	// AT2G02930 // AT1G64660 // AT2G29470 // AT1G74590 // AT1G69930 // AT1G69920 // AT1G02920 // AT1G02930
GO:0016491	Molecular Function	oxidoreductase activity	0.004	// AT3G49120 // AT1G04580 // AT1G59950 // AT2G33380 // AT4G21840 // AT2G34500 // AT2G19500 // AT4G33150 // AT3G08970 // AT1G65970 // AT1G06100 // AT3G26220 // AT4G37530 // AT5G05600 // AT1G30100 // AT5G38900 // AT1G17020 // AT3G26830 // AT4G21830 // AT1G26420 // AT4G32810 // AT1G45145 // AT2G02580 // AT4G37990 // AT4G37520 // AT1G32350 // AT3G55970 // AT1G28480 // AT2G38240 // AT5G06730 // AT1G03…
GO:0016758	Molecular Function	transferase activity, transferring hexosyl groups	0.0043	// AT5G59590 // AT2G36770 // AT4G25810 // AT1G22400 // AT4G15280 // AT5G57550 // AT4G27480 // AT2G14620 // AT3G48580 // AT4G30270 // AT1G73810 // AT5G59580 // AT1G53100
GO:0004553	Molecular Function	hydrolase activity, hydrolyzing O-glycosyl compounds	0.024	// AT5G11920 // AT4G25810 // AT3G60140 // AT5G57550 // AT2G14620 // AT3G48580 // AT4G30270 // AT2G43570 // AT3G57260 // AT5G66150 // AT3G13790 // AT1G61810
GO:0016798	Molecular Function	hydrolase activity, acting on glycosyl bonds	0.042	// AT5G11920 // AT4G25810 // AT3G60140 // AT5G57550 // AT2G14620 // AT3G48580 // AT4G30270 // AT2G43570 // AT3G57260 // AT5G66150 // AT3G13790 // AT1G61810
GO:0008194	Molecular Function	UDP-glycosyltransferase activity	0.043	// AT5G59590 // AT2G36770 // AT1G22400 // AT4G15280 // AT3G10320 // AT4G27480 // AT5G59580 // AT1G73810 // AT1G53100
GO:0016667	Molecular Function	oxidoreductase activity, acting on a sulfur group of donors	0.043	// AT4G21830 // AT5G38900 // AT1G45145 // AT4G21840 // AT1G28480 // AT1G03850
GO:0016757	Molecular Function	transferase activity, transferring glycosyl groups	0.049	// AT5G59590 // AT2G36770 // AT4G25810 // AT1G22400 // AT4G15280 // AT3G10320 // AT4G27480 // AT2G14620 // AT3G48580 // AT4G30270 // AT5G57550 // AT1G73810 // AT5G49690 // AT5G59580 // AT1G53100
GO:0005576	Cellular Component	extracellular region	1.2e-06	// AT1G44130 // AT3G49120 // AT1G68290 // AT3G10320 // AT1G16420 // AT1G70690 // AT3G48580 // AT5G14180 // AT2G14620 // AT1G28650 // AT5G49690 // AT2G34500 // AT2G19500 // AT4G25810 // AT5G46960 // AT4G04490 // AT3G25020 // AT1G19610 // AT4G23260 // AT2G33130 // AT2G15080 // AT5G48400 // AT3G51440 // AT1G74010 // AT3G46280 // AT4G37530 // AT2G44240 // AT4G11650 // AT2G15220 // AT3G49780 // AT1G32…
GO:0071944	Cellular Component	cell periphery	9.2e-06	// AT1G44130 // AT5G46050 // AT3G49120 // AT4G04510 // AT4G11655 // AT3G47480 // AT1G62760 // AT5G65600 // AT3G29810 // AT3G63380 // AT4G13920 // AT4G21120 // AT3G09520 // AT3G13790 // AT1G74010 // AT1G72120 // AT2G35980 // AT3G22910 // AT4G25810 // AT1G61610 // AT1G51890 // AT4G04490 // AT4G23160 // AT1G65690 // AT1G47510 // AT3G28540 // AT4G23260 // AT3G08870 // AT1G32960 // AT3G22600 // AT4G36…
GO:0031224	Cellular Component	intrinsic component of membrane	0.00027	// AT1G70690 // AT5G46050 // AT3G63380 // AT4G04510 // AT3G10320 // AT3G13130 // AT1G53100 // AT4G27480 // AT5G65600 // AT3G29810 // AT4G28085 // AT2G35070 // AT4G21120 // AT1G67000 // AT1G21240 // AT5G27060 // AT3G48850 // AT2G42360 // AT1G72120 // AT2G34500 // AT2G35980 // AT3G13950 // AT2G32140 // AT1G61610 // AT1G51890 // AT4G04490 // AT1G55230 // AT1G65690 // AT4G11655 // AT3G28540 // AT3G08…
GO:0005886	Cellular Component	plasma membrane	0.0008	// AT5G46050 // AT3G63380 // AT4G04510 // AT4G11655 // AT3G47480 // AT1G62760 // AT5G65600 // AT3G29810 // AT4G13920 // AT4G21120 // AT3G44300 // AT1G74010 // AT1G72120 // AT2G35980 // AT3G22910 // AT1G61610 // AT1G51890 // AT4G04490 // AT1G65690 // AT1G47510 // AT3G28540 // AT4G23260 // AT3G08870 // AT4G23160 // AT4G36950 // AT2G32660 // AT4G23140 // AT5G38250 // AT1G65730 // AT4G39030 // AT5G59…
GO:0044425	Cellular Component	membrane part	0.0013	// AT1G70690 // AT5G46050 // AT3G63380 // AT4G04510 // AT3G10320 // AT3G13130 // AT1G53100 // AT4G27480 // AT5G65600 // AT3G29810 // AT4G28085 // AT2G35070 // AT4G21120 // AT1G67000 // AT1G21240 // AT5G27060 // AT3G48850 // AT2G42360 // AT1G72120 // AT2G34500 // AT2G35980 // AT3G13950 // AT2G32140 // AT1G61610 // AT1G51890 // AT4G04490 // AT1G55230 // AT1G65690 // AT4G11655 // AT3G28540 // AT3G08…
GO:0016021	Cellular Component	integral component of membrane	0.0013	// AT1G70690 // AT5G46050 // AT3G63380 // AT4G04510 // AT3G10320 // AT3G13130 // AT1G53100 // AT4G27480 // AT5G65600 // AT4G28085 // AT2G35070 // AT4G21120 // AT1G21240 // AT5G27060 // AT3G48850 // AT2G42360 // AT1G72120 // AT2G34500 // AT2G35980 // AT3G13950 // AT2G32140 // AT1G61610 // AT1G51890 // AT4G04490 // AT1G55230 // AT1G65690 // AT4G11655 // AT3G28540 // AT3G08870 // AT2G15080 // AT1G06…
GO:0048046	Cellular Component	apoplast	0.0027	// AT5G11920 // AT3G49120 // AT4G25810 // AT2G33130 // AT5G57550 // AT1G45145 // AT1G32940 // AT2G43570 // AT2G14620 // AT3G48580 // AT4G30270 // AT1G32960 // AT2G14610 // AT3G57260 // AT3G13790
GO:0016020	Cellular Component	membrane	0.0078	// AT5G46050 // AT4G04510 // AT3G47480 // AT1G62760 // AT5G65600 // AT2G33380 // AT4G21120 // AT1G72120 // AT2G34500 // AT1G61610 // AT4G23260 // AT1G35230 // AT1G06100 // AT3G11080 // AT3G26220 // AT3G46280 // AT1G30100 // AT5G25910 // AT3G28580 // AT4G03450 // AT3G57260 // AT2G01008 // AT3G60540 // AT2G25440 // AT5G43570 // AT1G14250 // AT1G14880 // AT1G45145 // AT4G23150 // AT4G15610 // AT3G13…
GO:0030312	Cellular Component	external encapsulating structure	0.011	// AT1G44130 // AT5G11920 // AT3G49120 // AT4G25810 // AT5G57550 // AT1G32940 // AT2G43570 // AT2G14620 // AT3G48580 // AT4G30270 // AT1G32960 // AT2G14610 // AT3G57260 // AT5G50260 // AT1G74010 // AT3G13790 // AT1G02930
GO:0005618	Cellular Component	cell wall	0.011	// AT1G44130 // AT5G11920 // AT3G49120 // AT4G25810 // AT5G57550 // AT1G32940 // AT2G43570 // AT2G14620 // AT3G48580 // AT4G30270 // AT1G32960 // AT2G14610 // AT3G57260 // AT5G50260 // AT1G74010 // AT3G13790 // AT1G02930
Functional enrichment for downregulated genes
GO term	Type of term	Description	p-value	Entries
GO:0044710	Biological Process	single-organism metabolic process	4.3e-07	// AT1G68850 // AT4G33790 // AT3G01260 // AT5G10040 // AT3G44550 // AT4G12270 // AT1G05260 // AT4G13280 // AT3G60280 // AT5G51060 // AT1G05240 // AT1G18140 // AT2G14920 // AT2G40370 // AT4G29800 // AT1G77120 // AT5G58860 // AT4G12280 // AT1G49860 // AT1G56630 // AT1G01580 // AT1G77530 // AT4G25310 // AT5G17820 // AT1G74460 // AT3G50400 // AT4G20240 // AT5G36180 // AT2G30210 // AT2G47460 // AT5G24…
GO:0009698	Biological Process	phenylpropanoid metabolic process	1.4e-06	// AT5G58860 // AT1G18140 // AT2G40370 // AT3G44550 // AT5G13580 // AT1G77520 // AT1G77530 // AT3G11430 // AT3G44540 // AT4G26220 // AT5G41040 // AT2G30210
GO:0010345	Biological Process	suberin biosynthetic process	1.4e-06	// AT5G58860 // AT3G44550 // AT5G13580 // AT3G44540 // AT5G41040 // AT3G11430
GO:0019748	Biological Process	secondary metabolic process	1.4e-06	// AT4G31940 // AT5G24960 // AT5G58860 // AT4G37410 // AT2G40370 // AT3G44550 // AT5G13580 // AT3G44540 // AT1G77520 // AT1G77530 // AT3G11430 // AT5G36180 // AT1G49860 // AT1G73270 // AT1G18140 // AT4G20240 // AT4G26220 // AT5G41040 // AT2G30210
GO:0055114	Biological Process	oxidation-reduction process	1.9e-06	// AT1G68850 // AT4G33790 // AT2G40370 // AT5G10040 // AT3G44550 // AT4G12270 // AT1G05260 // AT5G51060 // AT1G05240 // AT1G77120 // AT4G12280 // AT1G01580 // AT4G25310 // AT5G17820 // AT2G30210 // AT5G24960 // AT4G11290 // AT3G01190 // AT2G35380 // AT5G15180 // AT1G12010 // AT2G19590 // AT1G18140 // AT5G58860 // AT1G12740 // AT4G31940 // AT4G37410 // AT3G47360 // AT5G38000 // AT3G60280 // AT4G21…
GO:0044699	Biological Process	single-organism process	3.4e-05	// AT1G51830 // AT3G44550 // AT4G12270 // AT5G51060 // AT1G05240 // AT3G24240 // AT3G62740 // AT3G12820 // AT4G12280 // AT5G46900 // AT1G74500 // AT5G13580 // AT5G15180 // AT5G09520 // AT3G54770 // AT5G62165 // AT1G48500 // AT5G41040 // AT1G12740 // AT2G48130 // AT4G31940 // AT4G11880 // AT4G37410 // AT4G15290 // AT1G18100 // AT5G48940 // AT4G12170 // AT4G21200 // AT4G26220 // AT1G16440 // AT1G80…
GO:0042744	Biological Process	hydrogen peroxide catabolic process	4.5e-05	// AT1G68850 // AT4G11290 // AT1G05260 // AT2G35380 // AT5G15180 // AT5G17820 // AT3G01190 // AT1G05240
GO:0009699	Biological Process	phenylpropanoid biosynthetic process	5.4e-05	// AT5G58860 // AT3G44550 // AT5G13580 // AT1G77520 // AT1G77530 // AT3G44540 // AT4G26220 // AT5G41040 // AT3G11430
GO:0044550	Biological Process	secondary metabolite biosynthetic process	7.4e-05	// AT4G31940 // AT5G24960 // AT5G58860 // AT4G37410 // AT3G44550 // AT5G13580 // AT3G44540 // AT1G77520 // AT1G77530 // AT4G20240 // AT4G26220 // AT5G41040 // AT3G11430
GO:0042743	Biological Process	hydrogen peroxide metabolic process	0.00015	// AT1G68850 // AT4G11290 // AT1G05260 // AT2G35380 // AT5G15180 // AT5G17820 // AT3G01190 // AT1G05240
GO:0010015	Biological Process	root morphogenesis	0.00027	// AT4G01630 // AT2G03720 // AT1G72490 // AT3G24240 // AT4G15290 // AT5G48940 // AT3G24300 // AT5G51060 // AT1G74500 // AT4G11880 // AT1G16440
GO:0072593	Biological Process	reactive oxygen species metabolic process	0.00049	// AT1G68850 // AT4G11290 // AT1G05260 // AT2G35380 // AT5G15180 // AT5G17820 // AT5G51720 // AT3G01190 // AT1G05240
GO:0006979	Biological Process	response to oxidative stress	0.00057	// AT1G77120 // AT4G11290 // AT1G05260 // AT2G35380 // AT5G38000 // AT5G15180 // AT4G19690 // AT1G68850 // AT5G17820 // AT3G01190 // AT1G05240 // AT4G01970 // AT2G19590 // AT5G10720
GO:0022622	Biological Process	root system development	0.0041	// AT4G01630 // AT2G03720 // AT1G33280 // AT3G24240 // AT4G15290 // AT5G48940 // AT1G72490 // AT3G24300 // AT5G51060 // AT1G74500 // AT5G10720 // AT4G11880 // AT1G16440
GO:0009664	Biological Process	plant-type cell wall organization	0.0041	// AT4G01630 // AT1G05260 // AT4G08400 // AT5G15180 // AT1G26250 // AT1G23720 // AT5G41040
GO:0048364	Biological Process	root development	0.0041	// AT4G01630 // AT2G03720 // AT1G33280 // AT3G24240 // AT4G15290 // AT5G48940 // AT1G72490 // AT3G24300 // AT5G51060 // AT1G74500 // AT5G10720 // AT4G11880 // AT1G16440
GO:0099402	Biological Process	plant organ development	0.0048	// AT4G01630 // AT2G03720 // AT1G33280 // AT3G24240 // AT4G15290 // AT3G24300 // AT2G30130 // AT5G48940 // AT5G62165 // AT1G72490 // AT5G51720 // AT5G51060 // AT5G06839 // AT1G74500 // AT5G10720 // AT4G11880 // AT1G16440 // AT5G42630 // AT3G14940
GO:0009808	Biological Process	lignin metabolic process	0.0052	// AT1G18140 // AT2G40370 // AT1G77520 // AT1G77530 // AT4G26220 // AT2G30210
GO:0071555	Biological Process	cell wall organization	0.0063	// AT4G01630 // AT1G05260 // AT5G14650 // AT4G15290 // AT1G05660 // AT3G44990 // AT4G08400 // AT5G15180 // AT2G43880 // AT5G51500 // AT1G26250 // AT1G23720 // AT5G41040
GO:0006629	Biological Process	lipid metabolic process	0.0063	// AT4G29800 // AT5G38020 // AT4G33790 // AT3G47360 // AT3G44550 // AT3G61680 // AT2G18620 // AT3G44540 // AT2G14920 // AT4G13280 // AT1G56630 // AT4G21200 // AT1G74460 // AT3G50400 // AT5G58860 // AT1G12740 // AT3G11430 // AT1G33750 // AT1G80340
GO:0071669	Biological Process	plant-type cell wall organization or biogenesis	0.0064	// AT4G01630 // AT1G05260 // AT1G33280 // AT4G15290 // AT4G08400 // AT5G15180 // AT1G26250 // AT1G23720 // AT5G41040
GO:0008152	Biological Process	metabolic process	0.0071	// AT1G51830 // AT4G19820 // AT3G44550 // AT4G12270 // AT1G73330 // AT5G51060 // AT1G05240 // AT3G24240 // AT3G62740 // AT5G24960 // AT4G12280 // AT4G25310 // AT1G74500 // AT5G13580 // AT5G15180 // AT5G62165 // AT1G48500 // AT1G49210 // AT5G41040 // AT1G12740 // AT2G48130 // AT4G31940 // AT4G37410 // AT4G15290 // AT5G48940 // AT4G12170 // AT5G51500 // AT4G21200 // AT4G26220 // AT1G16440 // AT1G80…
GO:0045229	Biological Process	external encapsulating structure organization	0.0091	// AT4G01630 // AT1G05260 // AT5G14650 // AT4G15290 // AT1G05660 // AT3G44990 // AT4G08400 // AT5G15180 // AT2G43880 // AT5G51500 // AT1G26250 // AT1G23720 // AT5G41040
GO:0050896	Biological Process	response to stimulus	0.0091	// AT1G68850 // AT1G51830 // AT2G40370 // AT3G44550 // AT1G05260 // AT4G19690 // AT4G13280 // AT1G73330 // AT5G42500 // AT5G51060 // AT1G05240 // AT3G24240 // AT1G48500 // AT2G01520 // AT2G14920 // AT5G06839 // AT2G23050 // AT4G29800 // AT1G77120 // AT5G38030 // AT2G03720 // AT5G20150 // AT4G01970 // AT1G49860 // AT1G01580 // AT4G22235 // AT4G31320 // AT2G21045 // AT5G01060 // AT5G17820 // AT5G63…
GO:0071554	Biological Process	cell wall organization or biogenesis	0.0091	// AT4G01630 // AT1G05260 // AT1G33280 // AT4G15290 // AT1G05660 // AT3G44990 // AT4G08400 // AT5G15180 // AT2G43880 // AT5G51500 // AT1G26250 // AT1G23720 // AT5G14650 // AT5G41040 // AT2G43590
GO:0009056	Biological Process	catabolic process	0.028	// AT1G68850 // AT4G19820 // AT3G44990 // AT1G05260 // AT1G05240 // AT4G11320 // AT2G40370 // AT4G29800 // AT4G19770 // AT1G49860 // AT5G17820 // AT1G74460 // AT3G50400 // AT2G30210 // AT4G11290 // AT3G01190 // AT2G35380 // AT5G15180 // AT1G18140 // AT1G23410 // AT5G51500 // AT2G43590
GO:0003824	Molecular Function	catalytic activity	2.9e-07	// AT1G51830 // AT4G19820 // AT3G44550 // AT4G12270 // AT1G73330 // AT5G51060 // AT1G05240 // AT3G24240 // AT1G14240 // AT4G12280 // AT3G13784 // AT4G25310 // AT5G13580 // AT5G15180 // AT3G62740 // AT1G49210 // AT5G41040 // AT1G12740 // AT2G48130 // AT4G31940 // AT4G37410 // AT4G15290 // AT5G48940 // AT5G51500 // AT4G21200 // AT3G50300 // AT4G26220 // AT1G16440 // AT1G80340 // AT3G01260 // AT1G05…
GO:0016491	Molecular Function	oxidoreductase activity	1.2e-06	// AT1G68850 // AT4G33790 // AT2G40370 // AT3G44550 // AT4G12270 // AT1G05260 // AT5G51060 // AT1G05240 // AT5G58910 // AT1G77120 // AT4G12280 // AT1G01580 // AT2G21045 // AT4G25310 // AT5G17820 // AT4G20240 // AT2G30210 // AT5G24960 // AT4G11290 // AT3G01190 // AT2G35380 // AT5G15180 // AT1G12010 // AT2G19590 // AT1G18140 // AT5G58860 // AT1G12740 // AT4G31940 // AT4G37410 // AT3G47360 // AT5G38…
GO:0004601	Molecular Function	peroxidase activity	9.9e-05	// AT1G68850 // AT4G11290 // AT1G05260 // AT2G35380 // AT5G15180 // AT5G17820 // AT5G51060 // AT1G05240 // AT3G01190
GO:0016684	Molecular Function	oxidoreductase activity, acting on peroxide as acceptor	0.00011	// AT1G68850 // AT4G11290 // AT1G05260 // AT2G35380 // AT5G15180 // AT5G17820 // AT5G51060 // AT1G05240 // AT3G01190
GO:0020037	Molecular Function	heme binding	0.00021	// AT4G31940 // AT5G24960 // AT4G11290 // AT1G05260 // AT4G37410 // AT1G68850 // AT5G15180 // AT5G17820 // AT3G01190 // AT1G05240 // AT2G35380 // AT5G58860 // AT1G12740
GO:0016209	Molecular Function	antioxidant activity	0.00047	// AT1G68850 // AT4G11290 // AT1G05260 // AT2G35380 // AT5G15180 // AT5G17820 // AT5G51060 // AT1G05240 // AT3G01190
GO:0046906	Molecular Function	tetrapyrrole binding	0.00047	// AT4G31940 // AT5G24960 // AT4G11290 // AT1G05260 // AT4G37410 // AT1G68850 // AT5G15180 // AT5G17820 // AT3G01190 // AT1G05240 // AT2G35380 // AT5G58860 // AT1G12740
GO:0016722	Molecular Function	oxidoreductase activity, oxidizing metal ions	0.0024	// AT1G01580 // AT5G58910 // AT1G18140 // AT2G30210 // AT2G40370
GO:0005507	Molecular Function	copper ion binding	0.0028	// AT4G12280 // AT5G07475 // AT4G12270 // AT3G60280 // AT1G18140 // AT2G01520 // AT2G01530 // AT2G30210 // AT2G40370
GO:0004553	Molecular Function	hydrolase activity, hydrolyzing O-glycosyl compounds	0.029	// AT5G14650 // AT4G19820 // AT1G05660 // AT3G44990 // AT3G13784 // AT2G43880 // AT4G01970 // AT4G19770 // AT3G62740 // AT2G43590
GO:0016798	Molecular Function	hydrolase activity, acting on glycosyl bonds	0.046	// AT5G14650 // AT4G19820 // AT1G05660 // AT3G44990 // AT3G13784 // AT2G43880 // AT4G01970 // AT4G19770 // AT3G62740 // AT2G43590
GO:0005576	Cellular Component	extracellular region	5.2e-05	// AT4G01630 // AT4G26330 // AT4G19820 // AT1G05660 // AT3G44990 // AT4G12270 // AT1G19900 // AT1G73330 // AT1G05240 // AT5G14650 // AT5G20790 // AT5G42500 // AT4G11320 // AT2G40370 // AT5G47635 // AT5G58910 // AT2G01880 // AT3G13784 // AT4G22235 // AT2G43880 // AT5G46900 // AT5G17820 // AT5G63660 // AT1G74460 // AT3G50400 // AT5G37990 // AT3G46270 // AT2G30210 // AT4G11290 // AT1G05260 // AT2G35…

## Sheet: VS-0
Functional enrichment for upregulated genes
GO term	Type of term	Description	p-value	Entries
GO:0006952	Biological Process	defense response	1.1e-21	// AT5G46050 // AT1G30135 // AT3G57260 // AT4G37990 // AT2G34930 // AT5G64120 // AT5G65600 // AT5G01900 // AT3G25180 // AT1G66090 // AT5G14180 // AT3G05660 // AT5G27060 // AT3G50930 // AT2G23970 // AT5G46350 // AT5G20230 // AT5G64905 // AT2G14610 // AT3G11010 // AT2G39030 // AT4G25110 // AT4G12490 // AT1G19610 // AT1G72840 // AT1G56650 // AT4G23160 // AT4G12480 // AT4G11170 // AT5G10760 // AT2G32…
GO:0006950	Biological Process	response to stress	3.3e-19	// AT5G46050 // AT2G34930 // AT5G65600 // AT4G21840 // AT2G23970 // AT5G46350 // AT5G64905 // AT4G37530 // AT4G25110 // AT1G19610 // AT3G05660 // AT5G13170 // AT5G10760 // AT2G44240 // AT2G39030 // AT3G28580 // AT3G50940 // AT3G28340 // AT3G12580 // AT3G11340 // AT4G21830 // AT1G45145 // AT4G23150 // AT5G57510 // AT1G52040 // AT5G10380 // AT1G51780 // AT4G01895 // AT4G12470 // AT5G05340 // AT1G30…
GO:0009607	Biological Process	response to biotic stimulus	2.9e-18	// AT5G46050 // AT5G01900 // AT2G34930 // AT5G64120 // AT5G65600 // AT1G33950 // AT4G37990 // AT5G14180 // AT3G51860 // AT3G44300 // AT3G50930 // AT5G46350 // AT5G20230 // AT2G14610 // AT1G51890 // AT4G12490 // AT1G19610 // AT1G56650 // AT4G23160 // AT4G12480 // AT5G10760 // AT3G51440 // AT3G11340 // AT1G61800 // AT1G02930 // AT1G73805 // AT4G23280 // AT5G39580 // AT5G38900 // AT4G23210 // AT1G79…
GO:0043207	Biological Process	response to external biotic stimulus	2.9e-18	// AT5G46050 // AT5G01900 // AT2G34930 // AT5G64120 // AT5G65600 // AT1G33950 // AT4G37990 // AT5G14180 // AT3G51860 // AT3G44300 // AT3G50930 // AT5G46350 // AT5G20230 // AT2G14610 // AT1G51890 // AT4G12490 // AT1G19610 // AT1G56650 // AT4G23160 // AT4G12480 // AT5G10760 // AT3G51440 // AT3G11340 // AT1G61800 // AT1G02930 // AT1G73805 // AT4G23280 // AT5G39580 // AT5G38900 // AT4G23210 // AT1G79…
GO:0051707	Biological Process	response to other organism	2.9e-18	// AT5G46050 // AT5G01900 // AT2G34930 // AT5G64120 // AT5G65600 // AT1G33950 // AT4G37990 // AT5G14180 // AT3G51860 // AT3G44300 // AT3G50930 // AT5G46350 // AT5G20230 // AT2G14610 // AT1G51890 // AT4G12490 // AT1G19610 // AT1G56650 // AT4G23160 // AT4G12480 // AT5G10760 // AT3G51440 // AT3G11340 // AT1G61800 // AT1G02930 // AT1G73805 // AT4G23280 // AT5G39580 // AT5G38900 // AT4G23210 // AT1G79…
GO:0050896	Biological Process	response to stimulus	5.8e-16	// AT1G75750 // AT5G46050 // AT2G34930 // AT5G65600 // AT1G33950 // AT4G21840 // AT2G23970 // AT2G20142 // AT4G21680 // AT5G64905 // AT4G37530 // AT4G25110 // AT1G19610 // AT1G72840 // AT5G13170 // AT4G17660 // AT5G10760 // AT2G44240 // AT2G39030 // AT3G28580 // AT3G50940 // AT2G25440 // AT3G28340 // AT3G12580 // AT3G11340 // AT4G21830 // AT1G45145 // AT4G23150 // AT5G57510 // AT1G52040 // AT5G10…
GO:0051704	Biological Process	multi-organism process	6.6e-16	// AT5G46050 // AT5G01900 // AT3G54150 // AT2G34930 // AT5G64120 // AT5G65600 // AT1G33950 // AT2G35070 // AT4G37990 // AT5G14180 // AT3G51860 // AT3G44300 // AT3G50930 // AT5G46350 // AT4G12470 // AT2G14610 // AT1G61610 // AT1G51890 // AT4G12490 // AT1G19610 // AT1G56650 // AT4G23160 // AT4G12480 // AT5G10760 // AT3G51440 // AT3G11340 // AT3G57260 // AT1G61800 // AT1G02930 // AT1G73805 // AT4G23…
GO:0009605	Biological Process	response to external stimulus	1.9e-15	// AT5G46050 // AT5G01900 // AT2G34930 // AT5G64120 // AT5G65600 // AT1G33950 // AT4G37990 // AT5G14180 // AT3G51860 // AT3G44300 // AT3G50930 // AT5G46350 // AT1G43910 // AT5G20230 // AT2G14610 // AT1G51890 // AT4G12490 // AT1G19610 // AT1G56650 // AT4G23160 // AT4G12480 // AT3G51440 // AT5G10760 // AT2G47190 // AT3G11340 // AT1G61800 // AT1G02930 // AT1G73805 // AT4G23280 // AT3G08860 // AT5G39…
GO:0098542	Biological Process	defense response to other organism	1.1e-12	// AT5G46050 // AT5G01900 // AT2G34930 // AT5G64120 // AT5G65600 // AT5G14180 // AT5G46350 // AT5G20230 // AT2G14610 // AT1G51890 // AT4G12490 // AT1G19610 // AT1G56650 // AT4G23160 // AT4G12480 // AT5G10760 // AT3G11340 // AT1G02930 // AT1G73805 // AT4G23280 // AT5G39580 // AT5G38900 // AT4G23210 // AT3G57260 // AT5G61890 // AT1G73260 // AT3G26830 // AT4G08870 // AT5G13320 // AT4G12470 // AT2G43…
GO:0009617	Biological Process	response to bacterium	1.9e-10	// AT5G46050 // AT5G01900 // AT1G33950 // AT3G44300 // AT3G50930 // AT5G46350 // AT1G51890 // AT4G23160 // AT4G12480 // AT1G02930 // AT1G73805 // AT4G23280 // AT1G79680 // AT3G50480 // AT1G32960 // AT1G73260 // AT3G26830 // AT4G12470 // AT3G12580 // AT4G31800 // AT2G26440 // AT4G23150 // AT2G25000 // AT4G37990 // AT5G10380 // AT5G52640 // AT4G23210 // AT3G04720 // AT1G02920
GO:1901700	Biological Process	response to oxygen-containing compound	2.3e-09	// AT1G75750 // AT5G46050 // AT1G30135 // AT2G24850 // AT1G16420 // AT5G01900 // AT5G58670 // AT3G50930 // AT5G46350 // AT1G43910 // AT3G46080 // AT3G28210 // AT4G21680 // AT2G14610 // AT4G04490 // AT3G51440 // AT1G47510 // AT1G56650 // AT5G13170 // AT4G12480 // AT4G11170 // AT2G47190 // AT3G23250 // AT2G46400 // AT1G02930 // AT4G23280 // AT2G39030 // AT4G21830 // AT3G28580 // AT1G79680 // AT3G50…
GO:0009620	Biological Process	response to fungus	3e-09	// AT2G34930 // AT5G64120 // AT5G46350 // AT5G20230 // AT1G19610 // AT1G56650 // AT4G12480 // AT3G51440 // AT3G11340 // AT5G39580 // AT5G38900 // AT1G79680 // AT3G50480 // AT5G61890 // AT1G73260 // AT3G09940 // AT3G26830 // AT4G08870 // AT4G12470 // AT2G43510 // AT4G31800 // AT4G16260 // AT1G45145 // AT2G25000 // AT5G10380 // AT4G12490 // AT3G51450 // AT5G26170 // AT3G04720 // AT4G11890 // AT1G02…
GO:0002376	Biological Process	immune system process	1.7e-08	// AT3G50930 // AT5G46350 // AT2G14610 // AT4G12480 // AT5G10760 // AT1G73805 // AT5G38900 // AT3G57260 // AT3G50480 // AT1G32960 // AT3G26830 // AT5G13320 // AT3G04720 // AT4G31800 // AT4G16260 // AT4G37990 // AT1G51780 // AT2G43570 // AT5G64890 // AT4G23210 // AT4G01895 // AT4G12470 // AT5G05300 // AT1G02920
GO:0001101	Biological Process	response to acid chemical	2e-08	// AT1G75750 // AT5G46050 // AT1G30135 // AT2G24850 // AT5G01900 // AT3G50930 // AT5G46350 // AT1G43910 // AT3G28210 // AT2G14610 // AT4G04490 // AT3G51440 // AT1G47510 // AT1G56650 // AT5G13170 // AT4G12480 // AT4G11170 // AT2G47190 // AT3G23250 // AT1G76930 // AT1G02930 // AT4G23280 // AT2G39030 // AT3G28580 // AT1G79680 // AT3G50480 // AT3G61190 // AT1G73260 // AT3G09940 // AT3G26830 // AT5G42…
GO:0045087	Biological Process	innate immune response	4e-08	// AT3G50930 // AT2G14610 // AT4G12480 // AT5G10760 // AT1G73805 // AT5G38900 // AT3G57260 // AT3G50480 // AT1G32960 // AT3G26830 // AT5G13320 // AT3G04720 // AT4G16260 // AT4G37990 // AT1G51780 // AT2G43570 // AT5G64890 // AT4G23210 // AT4G01895 // AT4G12470 // AT5G05300 // AT1G02920
GO:0042221	Biological Process	response to chemical	4.1e-08	// AT1G75750 // AT5G46050 // AT1G30135 // AT1G47510 // AT2G24850 // AT1G16420 // AT5G01900 // AT1G71140 // AT5G58670 // AT1G69930 // AT3G44300 // AT1G69920 // AT3G50930 // AT5G46350 // AT1G43910 // AT3G46080 // AT3G28210 // AT4G21680 // AT5G25250 // AT5G64905 // AT2G14610 // AT4G04490 // AT3G51440 // AT2G29470 // AT2G25000 // AT1G56650 // AT5G13170 // AT4G12480 // AT4G11170 // AT2G47190 // AT5G56…
GO:0006955	Biological Process	immune response	6e-08	// AT3G50930 // AT2G14610 // AT4G12480 // AT5G10760 // AT1G73805 // AT5G38900 // AT3G57260 // AT3G50480 // AT1G32960 // AT3G26830 // AT5G13320 // AT3G04720 // AT4G16260 // AT4G37990 // AT1G51780 // AT2G43570 // AT5G64890 // AT4G23210 // AT4G01895 // AT4G12470 // AT5G05300 // AT1G02920
GO:0006979	Biological Process	response to oxidative stress	1.3e-07	// AT5G05340 // AT5G64120 // AT4G21840 // AT5G46350 // AT5G20230 // AT1G56650 // AT1G80130 // AT4G11170 // AT1G16420 // AT1G02930 // AT4G37530 // AT2G44240 // AT5G39580 // AT1G13340 // AT3G28580 // AT3G28340 // AT1G73260 // AT3G46090 // AT5G42380 // AT3G12580 // AT1G45145 // AT4G23150 // AT4G37520 // AT4G21830 // AT3G02840
GO:0009627	Biological Process	systemic acquired resistance	2.6e-07	// AT5G13320 // AT4G12470 // AT3G26830 // AT1G51780 // AT2G43570 // AT2G14610 // AT5G10760 // AT3G57260 // AT4G01895 // AT3G04720 // AT1G73805
GO:0009814	Biological Process	defense response, incompatible interaction	8.3e-07	// AT5G13320 // AT4G12470 // AT4G16260 // AT5G38900 // AT3G26830 // AT1G51780 // AT2G43570 // AT2G14610 // AT5G10760 // AT5G64890 // AT4G01895 // AT3G04720 // AT3G57260 // AT1G02920 // AT1G73805
GO:0009751	Biological Process	response to salicylic acid	1.7e-06	// AT4G23280 // AT5G46050 // AT5G01900 // AT4G31800 // AT2G25000 // AT1G79680 // AT3G50480 // AT5G13170 // AT3G51450 // AT2G47190 // AT3G61190 // AT1G73260 // AT3G50930 // AT3G51440 // AT1G76930 // AT1G28480
GO:0050832	Biological Process	defense response to fungus	3.3e-06	// AT2G34930 // AT5G64120 // AT5G46350 // AT5G20230 // AT1G19610 // AT1G56650 // AT4G12480 // AT3G26830 // AT5G39580 // AT5G38900 // AT5G61890 // AT3G11340 // AT4G08870 // AT3G04720 // AT2G43510 // AT4G31800 // AT4G16260 // AT1G45145 // AT2G25000 // AT4G12490 // AT5G26170 // AT4G12470 // AT4G11890 // AT1G02920
GO:0009753	Biological Process	response to jasmonic acid	3.9e-06	// AT5G46050 // AT1G30135 // AT2G14610 // AT2G39030 // AT2G24850 // AT1G47510 // AT4G23600 // AT1G56650 // AT3G50480 // AT3G51450 // AT5G26170 // AT3G09940 // AT3G23250 // AT3G51440 // AT1G76930 // AT1G28480
GO:0042742	Biological Process	defense response to bacterium	1.4e-05	// AT4G23280 // AT5G46050 // AT5G01900 // AT4G12470 // AT4G31800 // AT4G23150 // AT1G51890 // AT2G25000 // AT4G12480 // AT4G23160 // AT1G32960 // AT5G52640 // AT1G73260 // AT4G23210 // AT5G46350 // AT3G04720 // AT1G02920 // AT1G02930 // AT1G73805
GO:0014070	Biological Process	response to organic cyclic compound	2.3e-05	// AT1G75750 // AT5G46050 // AT5G01900 // AT2G14610 // AT4G23280 // AT4G31800 // AT2G25000 // AT1G79680 // AT3G50480 // AT5G13170 // AT4G30270 // AT2G43570 // AT3G51450 // AT2G47190 // AT3G61190 // AT1G73260 // AT3G50930 // AT3G51440 // AT1G76930 // AT1G28480
GO:0012501	Biological Process	programmed cell death	4.2e-05	// AT4G23280 // AT5G13320 // AT4G25110 // AT1G16420 // AT4G23210 // AT4G37990 // AT5G10380 // AT3G50480 // AT1G73260 // AT3G50930 // AT4G12470 // AT1G73805
GO:0010033	Biological Process	response to organic substance	8.6e-05	// AT1G75750 // AT5G46050 // AT1G30135 // AT2G24850 // AT5G01900 // AT5G58670 // AT3G50930 // AT5G46350 // AT1G43910 // AT3G46080 // AT3G28210 // AT2G14610 // AT4G04490 // AT1G47510 // AT1G56650 // AT5G13170 // AT4G12480 // AT3G51440 // AT2G47190 // AT3G28580 // AT3G23250 // AT2G46400 // AT1G73805 // AT4G23280 // AT2G39030 // AT5G07310 // AT4G23210 // AT1G79680 // AT3G50480 // AT5G61890 // AT3G61…
GO:0019748	Biological Process	secondary metabolic process	0.0001	// AT3G21230 // AT1G04580 // AT1G33030 // AT1G76470 // AT5G20230 // AT5G64120 // AT2G29470 // AT4G37990 // AT3G25180 // AT3G12220 // AT2G45570 // AT2G25450 // AT1G02930 // AT1G69930 // AT1G69920 // AT5G05340 // AT3G26210 // AT2G02580 // AT1G02920 // AT3G03470 // AT3G26830
GO:0008219	Biological Process	cell death	0.0001	// AT4G23280 // AT5G13320 // AT4G25110 // AT1G16420 // AT5G65600 // AT4G37990 // AT5G10380 // AT3G50480 // AT4G23210 // AT1G73260 // AT3G50930 // AT4G12470 // AT1G73805
GO:0002237	Biological Process	response to molecule of bacterial origin	0.00018	// AT4G31800 // AT2G25000 // AT3G50930 // AT1G73260 // AT4G23210 // AT1G73805
GO:0010112	Biological Process	regulation of systemic acquired resistance	0.00041	// AT4G01895 // AT1G51780 // AT1G73805 // AT5G13320 // AT3G26830
GO:0009636	Biological Process	response to toxic substance	0.00049	// AT5G05600 // AT1G45145 // AT2G29470 // AT4G23600 // AT1G56650 // AT1G69930 // AT1G69920 // AT1G02920 // AT1G02930
GO:0000302	Biological Process	response to reactive oxygen species	0.00063	// AT5G42380 // AT3G12580 // AT4G21830 // AT4G23150 // AT3G28580 // AT1G56650 // AT4G11170 // AT1G73260 // AT1G16420 // AT3G02840 // AT5G46350
GO:0031347	Biological Process	regulation of defense response	0.0027	// AT5G13320 // AT1G30135 // AT1G73805 // AT4G31800 // AT5G05300 // AT2G25000 // AT1G51780 // AT3G61190 // AT4G01895 // AT3G26830 // AT4G11890 // AT3G01080
GO:0010243	Biological Process	response to organonitrogen compound	0.003	// AT5G46050 // AT2G14610 // AT4G31800 // AT5G10380 // AT2G46400 // AT2G43570 // AT3G23250 // AT3G46090 // AT3G46080 // AT3G28210
GO:0032101	Biological Process	regulation of response to external stimulus	0.003	// AT5G13320 // AT4G31800 // AT1G51780 // AT5G13080 // AT4G01895 // AT3G26830 // AT1G73805
GO:0009719	Biological Process	response to endogenous stimulus	0.003	// AT1G75750 // AT5G46050 // AT1G30135 // AT2G24850 // AT5G58670 // AT5G46350 // AT1G43910 // AT3G46080 // AT3G28210 // AT2G14610 // AT4G04490 // AT1G47510 // AT1G56650 // AT5G13170 // AT4G12480 // AT3G51440 // AT2G47190 // AT3G28580 // AT3G23250 // AT2G46400 // AT2G39030 // AT5G07310 // AT3G50480 // AT5G61890 // AT4G04710 // AT3G09940 // AT3G46090 // AT3G26830 // AT4G32810 // AT4G31800 // AT4G23…
GO:0006874	Biological Process	cellular calcium ion homeostasis	0.003	// AT2G29110 // AT2G29120 // AT3G51860 // AT5G11210 // AT5G48410
GO:0055074	Biological Process	calcium ion homeostasis	0.0047	// AT2G29110 // AT2G29120 // AT3G51860 // AT5G11210 // AT5G48410
GO:0009628	Biological Process	response to abiotic stimulus	0.0048	// AT5G46050 // AT1G02580 // AT1G16420 // AT3G50930 // AT2G29110 // AT5G46350 // AT5G25250 // AT5G64905 // AT2G14610 // AT4G33150 // AT1G47510 // AT1G56650 // AT5G13170 // AT4G12480 // AT5G11210 // AT2G47190 // AT3G57260 // AT1G61800 // AT1G02930 // AT1G73805 // AT5G05600 // AT5G20230 // AT4G37530 // AT1G35210 // AT3G48850 // AT3G50940 // AT3G61190 // AT1G73260 // AT3G09940 // AT3G12580 // AT3G26…
GO:0009611	Biological Process	response to wounding	0.0048	// AT5G46050 // AT1G30135 // AT5G20230 // AT2G24850 // AT4G23600 // AT3G51450 // AT3G51440 // AT3G61190 // AT1G73260 // AT1G51760 // AT1G76930
GO:0010035	Biological Process	response to inorganic substance	0.0048	// AT1G16420 // AT3G51860 // AT3G44300 // AT5G46350 // AT4G21680 // AT2G14610 // AT1G56650 // AT4G11170 // AT2G47190 // AT5G56795 // AT1G02930 // AT4G21830 // AT3G28580 // AT1G73260 // AT3G09940 // AT3G12580 // AT3G26830 // AT5G42380 // AT1G52890 // AT1G45145 // AT5G58670 // AT2G43570 // AT3G23250 // AT3G02840 // AT4G11890 // AT1G02920
GO:0009615	Biological Process	response to virus	0.0048	// AT3G12580 // AT4G31800 // AT2G43570 // AT3G51450 // AT3G51440 // AT5G46350 // AT3G04720
GO:0010411	Biological Process	xyloglucan metabolic process	0.0048	// AT4G25810 // AT5G57550 // AT3G48580 // AT4G30270 // AT1G10550 // AT4G30280
GO:0009626	Biological Process	plant-type hypersensitive response	0.0048	// AT5G13320 // AT4G23210 // AT4G37990 // AT3G50480 // AT3G50930 // AT4G12470 // AT1G73805
GO:0034050	Biological Process	host programmed cell death induced by symbiont	0.0051	// AT5G13320 // AT4G23210 // AT4G37990 // AT3G50480 // AT3G50930 // AT4G12470 // AT1G73805
GO:0009651	Biological Process	response to salt stress	0.0052	// AT5G46050 // AT4G16260 // AT5G58670 // AT1G47510 // AT4G23600 // AT3G48850 // AT3G50940 // AT4G12480 // AT2G47190 // AT1G56650 // AT1G73260 // AT3G09940 // AT3G23250 // AT5G46350 // AT3G04720 // AT4G11890 // AT1G02920 // AT1G02930 // AT4G37530
GO:0009404	Biological Process	toxin metabolic process	0.0055	// AT2G29470 // AT1G69930 // AT1G69920 // AT1G02920 // AT1G02930 // AT3G26830
GO:0044419	Biological Process	interspecies interaction between organisms	0.0064	// AT5G13320 // AT3G12580 // AT4G31800 // AT2G43570 // AT3G51450 // AT3G51440 // AT3G09940 // AT5G46350 // AT3G04720
GO:0006970	Biological Process	response to osmotic stress	0.0064	// AT5G46050 // AT4G16260 // AT5G58670 // AT1G47510 // AT4G23600 // AT3G48850 // AT3G50940 // AT5G13170 // AT4G12480 // AT2G47190 // AT1G56650 // AT1G73260 // AT3G09940 // AT3G23250 // AT5G46350 // AT3G04720 // AT4G11890 // AT1G02920 // AT1G02930 // AT4G37530
GO:0044550	Biological Process	secondary metabolite biosynthetic process	0.0065	// AT3G21230 // AT5G05340 // AT1G33030 // AT1G76470 // AT5G20230 // AT4G37990 // AT3G25180 // AT2G45570 // AT2G25450 // AT3G26830 // AT2G02580 // AT3G03470 // AT3G26210
GO:0080134	Biological Process	regulation of response to stress	0.0074	// AT5G13320 // AT1G30135 // AT1G73805 // AT4G31800 // AT5G05300 // AT2G25000 // AT1G51780 // AT3G61190 // AT4G01895 // AT5G46350 // AT3G26830 // AT4G11890 // AT3G01080
GO:0072503	Biological Process	cellular divalent inorganic cation homeostasis	0.0077	// AT2G29110 // AT2G29120 // AT3G51860 // AT5G11210 // AT5G48410
GO:0002831	Biological Process	regulation of response to biotic stimulus	0.0099	// AT5G13320 // AT4G31800 // AT1G51780 // AT4G01895 // AT3G26830 // AT1G73805
GO:0090487	Biological Process	secondary metabolite catabolic process	0.012	// AT1G02930 // AT2G29470 // AT1G69930 // AT1G69920 // AT1G02920
GO:0009407	Biological Process	toxin catabolic process	0.012	// AT1G02930 // AT2G29470 // AT1G69930 // AT1G69920 // AT1G02920
GO:0009737	Biological Process	response to abscisic acid	0.013	// AT1G75750 // AT5G46050 // AT4G04490 // AT3G28580 // AT1G47510 // AT4G23600 // AT5G58670 // AT1G76930 // AT5G13170 // AT4G12480 // AT2G47190 // AT4G04710 // AT3G02410 // AT5G46350 // AT1G43910 // AT4G11890 // AT3G28210 // AT3G26830
GO:0044699	Biological Process	single-organism process	0.014	// AT1G75750 // AT2G34930 // AT5G65600 // AT4G21120 // AT2G25450 // AT4G21840 // AT1G28650 // AT2G20142 // AT4G21680 // AT3G54150 // AT3G45970 // AT1G61610 // AT4G37530 // AT4G25110 // AT1G72840 // AT5G13170 // AT1G65360 // AT4G29570 // AT5G05600 // AT2G39030 // AT2G25440 // AT3G28340 // AT3G11340 // AT4G21830 // AT1G45145 // AT5G10380 // AT4G12470 // AT1G28480 // AT3G26210 // AT5G05340 // AT1G30…
GO:0097305	Biological Process	response to alcohol	0.014	// AT1G75750 // AT5G46050 // AT4G04490 // AT3G28580 // AT1G47510 // AT4G23600 // AT5G58670 // AT1G76930 // AT5G13170 // AT4G12480 // AT2G47190 // AT4G04710 // AT3G02410 // AT5G46350 // AT1G43910 // AT4G11890 // AT3G28210 // AT3G26830
GO:0043900	Biological Process	regulation of multi-organism process	0.017	// AT5G13320 // AT3G09940 // AT4G31800 // AT1G51780 // AT4G01895 // AT3G26830 // AT1G73805
GO:1901698	Biological Process	response to nitrogen compound	0.017	// AT5G46050 // AT2G14610 // AT4G31800 // AT5G10380 // AT3G28210 // AT2G43570 // AT3G23250 // AT3G46090 // AT3G46080 // AT2G46400 // AT4G21680
GO:0002682	Biological Process	regulation of immune system process	0.017	// AT5G13320 // AT4G31800 // AT1G51780 // AT4G01895 // AT3G26830 // AT5G05300 // AT1G73805
GO:0072507	Biological Process	divalent inorganic cation homeostasis	0.019	// AT2G29110 // AT2G29120 // AT3G51860 // AT5G11210 // AT5G48410
GO:0044403	Biological Process	symbiosis, encompassing mutualism through parasitism	0.021	// AT3G12580 // AT4G31800 // AT2G43570 // AT3G51450 // AT3G51440 // AT3G09940 // AT5G46350 // AT3G04720
GO:0010383	Biological Process	cell wall polysaccharide metabolic process	0.023	// AT4G25810 // AT5G57550 // AT3G29810 // AT3G48580 // AT4G30270 // AT1G10550 // AT4G30280
GO:0044036	Biological Process	cell wall macromolecule metabolic process	0.027	// AT4G25810 // AT5G57550 // AT3G29810 // AT3G48580 // AT4G30270 // AT2G43570 // AT1G10550 // AT4G30280
GO:0009725	Biological Process	response to hormone	0.033	// AT1G75750 // AT5G46050 // AT1G30135 // AT2G24850 // AT5G46350 // AT1G43910 // AT3G28210 // AT2G14610 // AT4G04490 // AT1G47510 // AT1G56650 // AT5G13170 // AT4G12480 // AT3G51440 // AT2G47190 // AT3G28580 // AT3G23250 // AT1G76930 // AT2G39030 // AT5G07310 // AT3G50480 // AT5G61890 // AT4G04710 // AT3G09940 // AT3G26830 // AT4G32810 // AT4G23600 // AT5G58670 // AT4G30270 // AT3G51450 // AT5G26…
GO:0009808	Biological Process	lignin metabolic process	0.038	// AT5G05340 // AT1G33030 // AT1G76470 // AT5G20230 // AT5G64120 // AT4G37990
GO:0016032	Biological Process	viral process	0.038	// AT3G12580 // AT4G31800 // AT2G43570 // AT3G51450 // AT3G51440 // AT5G46350 // AT3G04720
GO:0010410	Biological Process	hemicellulose metabolic process	0.038	// AT4G25810 // AT5G57550 // AT3G48580 // AT4G30270 // AT1G10550 // AT4G30280
GO:0045088	Biological Process	regulation of innate immune response	0.038	// AT5G13320 // AT1G51780 // AT4G01895 // AT3G26830 // AT5G05300 // AT1G73805
GO:0010200	Biological Process	response to chitin	0.042	// AT4G31800 // AT5G10380 // AT2G46400 // AT3G23250 // AT3G46090 // AT3G46080 // AT3G28210
GO:0006073	Biological Process	cellular glucan metabolic process	0.046	// AT1G65610 // AT4G25810 // AT5G57550 // AT4G39210 // AT3G29810 // AT3G48580 // AT4G30270 // AT1G10550 // AT4G30280
GO:0044042	Biological Process	glucan metabolic process	0.046	// AT1G65610 // AT4G25810 // AT5G57550 // AT4G39210 // AT3G29810 // AT3G48580 // AT4G30270 // AT1G10550 // AT4G30280
GO:0050776	Biological Process	regulation of immune response	0.046	// AT5G13320 // AT1G51780 // AT4G01895 // AT3G26830 // AT5G05300 // AT1G73805
GO:0003824	Molecular Function	catalytic activity	0.0005	// AT4G04510 // AT2G36770 // AT5G65600 // AT2G25450 // AT4G21840 // AT3G57700 // AT1G28650 // AT2G23970 // AT3G54150 // AT4G25810 // AT1G61610 // AT4G25110 // AT3G05660 // AT4G17660 // AT5G10760 // AT4G34210 // AT3G46280 // AT4G29570 // AT5G05600 // AT2G39030 // AT4G21830 // AT1G32940 // AT3G28580 // AT3G50940 // AT2G25440 // AT3G28340 // AT3G11340 // AT5G11920 // AT1G45145 // AT1G09995 // AT5G10…
GO:0016762	Molecular Function	xyloglucan:xyloglucosyl transferase activity	0.0022	// AT4G25810 // AT5G57550 // AT3G48580 // AT4G30270 // AT1G10550 // AT4G30280
GO:0016740	Molecular Function	transferase activity	0.0028	// AT4G23280 // AT5G59590 // AT4G04510 // AT4G14365 // AT2G36770 // AT2G24850 // AT1G02580 // AT5G39030 // AT4G27480 // AT5G65600 // AT1G67000 // AT1G01680 // AT3G57700 // AT1G69920 // AT1G10550 // AT2G42360 // AT2G32030 // AT3G11010 // AT4G36950 // AT1G70440 // AT3G54150 // AT4G25810 // AT1G61610 // AT1G51890 // AT4G04490 // AT4G39210 // AT2G29470 // AT3G05660 // AT2G36760 // AT4G23160 // AT4G17…
GO:0071944	Cellular Component	cell periphery	2.6e-06	// AT1G75750 // AT5G46050 // AT4G04510 // AT3G47480 // AT2G34930 // AT1G62760 // AT5G65600 // AT4G21120 // AT4G21680 // AT3G45970 // AT4G25810 // AT1G61610 // AT3G17690 // AT3G05660 // AT5G13170 // AT1G32940 // AT3G28580 // AT3G57260 // AT2G25440 // AT5G11920 // AT1G14880 // AT1G45145 // AT4G23150 // AT5G10380 // AT5G53870 // AT3G50570 // AT4G12470 // AT5G05340 // AT3G48580 // AT3G22910 // AT2G14…
GO:0030312	Cellular Component	external encapsulating structure	3.5e-06	// AT1G44130 // AT1G75750 // AT2G34930 // AT5G64120 // AT3G48580 // AT4G16563 // AT1G10550 // AT3G45970 // AT4G25810 // AT4G30270 // AT4G12480 // AT5G05340 // AT1G74010 // AT1G02930 // AT1G32940 // AT3G57260 // AT1G32960 // AT2G14610 // AT5G11920 // AT3G12580 // AT4G16260 // AT5G57550 // AT2G26440 // AT4G30280 // AT4G12490 // AT2G43570 // AT4G12500 // AT5G52640 // AT4G12470
GO:0005618	Cellular Component	cell wall	3.5e-06	// AT1G44130 // AT1G75750 // AT2G34930 // AT5G64120 // AT3G48580 // AT4G16563 // AT1G10550 // AT3G45970 // AT4G25810 // AT4G30270 // AT4G12480 // AT5G05340 // AT1G74010 // AT1G02930 // AT1G32940 // AT3G57260 // AT1G32960 // AT2G14610 // AT5G11920 // AT3G12580 // AT4G16260 // AT5G57550 // AT2G26440 // AT4G30280 // AT4G12490 // AT2G43570 // AT4G12500 // AT5G52640 // AT4G12470
GO:0005576	Cellular Component	extracellular region	3.5e-06	// AT1G44130 // AT1G75750 // AT1G68290 // AT3G10320 // AT1G16420 // AT1G28650 // AT1G67000 // AT5G14180 // AT2G14610 // AT4G16563 // AT1G10550 // AT1G36622 // AT4G12470 // AT3G45970 // AT4G25810 // AT1G51890 // AT4G04490 // AT4G30270 // AT4G23280 // AT4G23600 // AT1G19610 // AT2G45570 // AT4G12480 // AT5G10760 // AT5G64120 // AT5G39030 // AT3G51440 // AT5G05340 // AT1G74010 // AT3G12220 // AT3G46…
GO:0048046	Cellular Component	apoplast	8.1e-05	// AT1G63245 // AT5G11920 // AT4G25810 // AT3G12580 // AT4G16260 // AT5G57550 // AT1G45145 // AT1G32940 // AT5G64120 // AT4G23600 // AT2G43570 // AT3G57260 // AT3G48580 // AT4G30270 // AT1G32960 // AT2G14610 // AT5G10760 // AT1G10550 // AT5G05340 // AT4G12470 // AT4G30280
GO:0031224	Cellular Component	intrinsic component of membrane	0.00059	// AT5G46050 // AT4G04510 // AT3G17690 // AT2G25510 // AT5G65600 // AT4G21120 // AT2G20142 // AT4G21680 // AT3G45970 // AT1G61610 // AT2G04495 // AT3G05660 // AT5G13170 // AT1G35320 // AT3G46280 // AT3G28580 // AT3G57260 // AT2G01008 // AT3G60540 // AT2G25440 // AT3G28340 // AT3G44430 // AT1G14880 // AT4G23150 // AT4G35170 // AT5G10380 // AT3G13090 // AT5G53870 // AT3G26210 // AT5G39030 // AT4G27…
GO:0016021	Cellular Component	integral component of membrane	0.0014	// AT5G46050 // AT4G04510 // AT3G17690 // AT2G25510 // AT5G65600 // AT4G21120 // AT2G20142 // AT4G21680 // AT3G45970 // AT1G61610 // AT3G05660 // AT5G13170 // AT1G35320 // AT3G46280 // AT3G28580 // AT5G48657 // AT2G01008 // AT3G60540 // AT2G25440 // AT3G28340 // AT3G44430 // AT1G14880 // AT4G23150 // AT4G35170 // AT5G10380 // AT3G13090 // AT3G26210 // AT5G39030 // AT4G27480 // AT5G25450 // AT2G25…
GO:0044425	Cellular Component	membrane part	0.002	// AT5G46050 // AT4G04510 // AT3G17690 // AT2G25510 // AT5G65600 // AT4G21120 // AT2G20142 // AT4G21680 // AT3G45970 // AT1G61610 // AT2G04495 // AT3G05660 // AT5G13170 // AT1G35320 // AT3G46280 // AT3G28580 // AT3G57260 // AT2G01008 // AT3G60540 // AT2G25440 // AT3G28340 // AT3G44430 // AT1G14880 // AT4G23150 // AT4G35170 // AT5G10380 // AT3G13090 // AT5G53870 // AT3G26210 // AT5G39030 // AT4G27…
GO:0016020	Cellular Component	membrane	0.0044	// AT5G46050 // AT4G04510 // AT3G47480 // AT2G25510 // AT1G62760 // AT5G65600 // AT4G21120 // AT2G20142 // AT4G21680 // AT3G45970 // AT1G61610 // AT3G17690 // AT3G05660 // AT5G13170 // AT4G17660 // AT1G35320 // AT3G46280 // AT3G28580 // AT4G30270 // AT5G48657 // AT2G01008 // AT3G60540 // AT2G25440 // AT3G28340 // AT3G44430 // AT1G14880 // AT1G45145 // AT4G23150 // AT4G35170 // AT5G10380 // AT3G13…
GO:0005886	Cellular Component	plasma membrane	0.0045	// AT4G23280 // AT5G46050 // AT3G63380 // AT1G47510 // AT1G51760 // AT3G47480 // AT4G30430 // AT1G62760 // AT3G50930 // AT3G29810 // AT5G64790 // AT3G28890 // AT4G21120 // AT5G58670 // AT3G50940 // AT3G47290 // AT4G04510 // AT3G44300 // AT1G10550 // AT1G43910 // AT4G21680 // AT5G25250 // AT3G56891 // AT1G61610 // AT1G51890 // AT3G47250 // AT3G17690 // AT3G05660 // AT5G13170 // AT4G23160 // AT2G32…
Functional enrichment for downregulated genes
GO term	Type of term	Description	p-value	Entries
GO:0042744	Biological Process	hydrogen peroxide catabolic process	7.6e-07	// AT1G68850 // AT4G11290 // AT1G05260 // AT2G38380 // AT3G01190 // AT2G18150 // AT2G39040 // AT5G17820 // AT1G44970 // AT1G05240 // AT1G05250 // AT5G22410
GO:0042743	Biological Process	hydrogen peroxide metabolic process	3.9e-06	// AT1G68850 // AT4G11290 // AT1G05260 // AT2G38380 // AT3G01190 // AT2G18150 // AT2G39040 // AT5G17820 // AT1G44970 // AT1G05240 // AT1G05250 // AT5G22410
GO:0036293	Biological Process	response to decreased oxygen levels	6.8e-06	// AT1G77120 // AT4G33070 // AT3G10040 // AT2G47520 // AT5G20830 // AT3G43190 // AT2G34390 // AT5G15120 // AT2G16060 // AT5G39890
GO:0070482	Biological Process	response to oxygen levels	6.8e-06	// AT1G77120 // AT4G33070 // AT3G10040 // AT2G47520 // AT5G20830 // AT3G43190 // AT2G34390 // AT5G15120 // AT2G16060 // AT5G39890
GO:0044699	Biological Process	single-organism process	2.6e-05	// AT4G12270 // AT5G62310 // AT5G16530 // AT1G66800 // AT5G51060 // AT1G05240 // AT3G24240 // AT3G63440 // AT5G57090 // AT3G55580 // AT4G28650 // AT1G06120 // AT1G22220 // AT1G12740 // AT1G66270 // AT5G46900 // AT4G12510 // AT1G79580 // AT1G74500 // AT5G44870 // AT3G01840 // AT5G15120 // AT1G76952 // AT1G15540 // AT5G13580 // AT5G09520 // AT2G22240 // AT3G47720 // AT4G14980 // AT3G03530 // AT1G05…
GO:0072593	Biological Process	reactive oxygen species metabolic process	2.6e-05	// AT1G68850 // AT4G11290 // AT1G05260 // AT2G38380 // AT3G01190 // AT2G18150 // AT2G39040 // AT5G17820 // AT5G51720 // AT1G44970 // AT1G05240 // AT1G05250 // AT5G22410
GO:0044710	Biological Process	single-organism metabolic process	5.8e-05	// AT5G45920 // AT4G10260 // AT4G17280 // AT1G06310 // AT1G68850 // AT5G20830 // AT4G12270 // AT1G04610 // AT3G01190 // AT4G13280 // AT1G66800 // AT1G52790 // AT5G51060 // AT1G05240 // AT1G33540 // AT3G63440 // AT3G45680 // AT3G49160 // AT5G15720 // AT2G39040 // AT1G77120 // AT5G58860 // AT3G55580 // AT1G06120 // AT1G66270 // AT1G63450 // AT4G23340 // AT1G77530 // AT3G26200 // AT1G49860 // AT5G17…
GO:0055114	Biological Process	oxidation-reduction process	5.8e-05	// AT1G68850 // AT4G17280 // AT1G06310 // AT1G04610 // AT4G12270 // AT3G01190 // AT2G39040 // AT1G52790 // AT5G51060 // AT1G05240 // AT3G63440 // AT1G77120 // AT5G58860 // AT1G15540 // AT4G23340 // AT3G26200 // AT1G06120 // AT5G17820 // AT2G05180 // AT4G22110 // AT2G30210 // AT5G39890 // AT5G10040 // AT4G11290 // AT1G05260 // AT1G52820 // AT2G25160 // AT2G18150 // AT1G12010 // AT1G05250 // AT2G19…
GO:0001666	Biological Process	response to hypoxia	0.00019	// AT1G77120 // AT3G10040 // AT5G20830 // AT3G43190 // AT2G34390 // AT5G15120 // AT2G16060 // AT5G39890
GO:0071555	Biological Process	cell wall organization	0.0003	// AT5G57530 // AT2G32990 // AT4G02290 // AT2G15370 // AT4G28850 // AT3G44990 // AT1G02810 // AT1G05260 // AT5G49270 // AT2G20750 // AT5G20860 // AT1G26250 // AT1G23720 // AT5G48070 // AT1G05250 // AT4G08400 // AT5G14650 // AT5G22410 // AT1G48100 // AT3G07970
GO:0009698	Biological Process	phenylpropanoid metabolic process	0.00045	// AT5G66690 // AT3G55580 // AT5G13580 // AT1G66270 // AT1G77520 // AT1G77530 // AT3G11430 // AT1G66800 // AT1G05250 // AT5G58860 // AT2G30210
GO:0019748	Biological Process	secondary metabolic process	0.00045	// AT3G26200 // AT5G58860 // AT5G36180 // AT3G55580 // AT1G27140 // AT2G25160 // AT5G13580 // AT1G66270 // AT5G66690 // AT1G77520 // AT1G77530 // AT3G11430 // AT1G66800 // AT1G49860 // AT2G05180 // AT1G05250 // AT5G06900 // AT2G30210 // AT1G33540
GO:0006979	Biological Process	response to oxidative stress	0.00051	// AT1G77120 // AT4G11290 // AT1G05260 // AT1G68850 // AT5G19790 // AT3G01190 // AT2G18150 // AT2G22240 // AT2G39040 // AT5G17820 // AT2G38380 // AT1G05240 // AT1G05250 // AT2G19590 // AT1G44970 // AT5G22410 // AT1G64360 // AT5G01600
GO:0045229	Biological Process	external encapsulating structure organization	0.00052	// AT5G57530 // AT2G32990 // AT4G02290 // AT2G15370 // AT4G28850 // AT3G44990 // AT1G02810 // AT1G05260 // AT5G49270 // AT2G20750 // AT5G20860 // AT1G26250 // AT1G23720 // AT5G48070 // AT1G05250 // AT4G08400 // AT5G14650 // AT5G22410 // AT1G48100 // AT3G07970
GO:0071554	Biological Process	cell wall organization or biogenesis	0.0016	// AT4G02290 // AT3G44990 // AT1G02810 // AT1G05260 // AT5G48070 // AT1G63450 // AT1G23720 // AT1G79580 // AT3G07970 // AT1G48100 // AT5G49270 // AT4G08400 // AT2G32990 // AT1G26250 // AT1G05250 // AT4G28850 // AT2G20750 // AT5G22410 // AT5G57530 // AT5G20860 // AT2G15370 // AT5G14650
GO:0009664	Biological Process	plant-type cell wall organization	0.0022	// AT5G49270 // AT4G08400 // AT1G05260 // AT1G26250 // AT1G23720 // AT1G05250 // AT5G22410 // AT2G20750 // AT3G07970
GO:0009808	Biological Process	lignin metabolic process	0.011	// AT5G66690 // AT3G55580 // AT1G77520 // AT1G77530 // AT1G66800 // AT1G05250 // AT2G30210
GO:0009056	Biological Process	catabolic process	0.011	// AT5G45920 // AT5G26220 // AT4G02290 // AT1G06310 // AT1G68850 // AT3G44990 // AT1G02810 // AT1G05260 // AT2G39040 // AT1G44970 // AT1G05240 // AT3G63440 // AT1G49860 // AT5G17820 // AT1G74460 // AT4G11310 // AT3G07970 // AT3G48340 // AT4G11290 // AT3G01190 // AT2G18150 // AT2G32990 // AT3G03530 // AT1G05250 // AT5G37690 // AT5G20860 // AT1G27140 // AT2G38380 // AT2G30210 // AT5G22410 // AT5G15…
GO:0031669	Biological Process	cellular response to nutrient levels	0.012	// AT5G48850 // AT5G20150 // AT1G80760 // AT1G66270 // AT2G22240 // AT5G24660 // AT2G19590 // AT1G04770 // AT3G09922
GO:0071669	Biological Process	plant-type cell wall organization or biogenesis	0.013	// AT5G49270 // AT2G15370 // AT4G08400 // AT1G05260 // AT1G26250 // AT1G23720 // AT1G79580 // AT1G05250 // AT5G22410 // AT2G20750 // AT3G07970
GO:0006950	Biological Process	response to stress	0.022	// AT1G68850 // AT4G22235 // AT4G10265 // AT5G20830 // AT5G44870 // AT1G05260 // AT4G13280 // AT1G73330 // AT5G24660 // AT5G51060 // AT1G05240 // AT1G04770 // AT3G45680 // AT1G64360 // AT2G16060 // AT4G05200 // AT1G77120 // AT5G48850 // AT5G20150 // AT3G55580 // AT5G45200 // AT5G19790 // AT1G66270 // AT3G54770 // AT5G17820 // AT5G63660 // AT1G16160 // AT2G47520 // AT5G15120 // AT5G39890 // AT2G47…
GO:0031667	Biological Process	response to nutrient levels	0.023	// AT5G48850 // AT5G20150 // AT1G80760 // AT1G66270 // AT2G22240 // AT5G24660 // AT2G19590 // AT1G04770 // AT3G09922
GO:0009267	Biological Process	cellular response to starvation	0.025	// AT5G48850 // AT5G20150 // AT1G66270 // AT2G22240 // AT5G24660 // AT2G19590 // AT1G04770 // AT3G09922
GO:0050896	Biological Process	response to stimulus	0.027	// AT5G44870 // AT5G62310 // AT5G16530 // AT1G73330 // AT5G51060 // AT1G05240 // AT3G24240 // AT3G55580 // AT4G28650 // AT1G22220 // AT1G66270 // AT1G74500 // AT3G01840 // AT5G15120 // AT5G42510 // AT5G13580 // AT3G54770 // AT4G10270 // AT4G14980 // AT3G15700 // AT1G05250 // AT3G09922 // AT4G19030 // AT1G15210 // AT1G27140 // AT1G18100 // AT5G48940 // AT1G76650 // AT2G40130 // AT1G44970 // AT4G14…
GO:0009699	Biological Process	phenylpropanoid biosynthetic process	0.03	// AT3G55580 // AT5G13580 // AT1G77520 // AT1G77530 // AT1G66800 // AT5G58860 // AT3G11430
GO:0031668	Biological Process	cellular response to extracellular stimulus	0.03	// AT5G48850 // AT5G20150 // AT1G80760 // AT1G66270 // AT2G22240 // AT5G24660 // AT2G19590 // AT1G04770 // AT3G09922
GO:0010015	Biological Process	root morphogenesis	0.03	// AT5G49270 // AT3G24300 // AT1G74500 // AT1G63450 // AT5G48940 // AT5G51060 // AT3G24240 // AT1G66470 // AT4G11880 // AT1G52240
GO:0010411	Biological Process	xyloglucan metabolic process	0.03	// AT5G57530 // AT3G44990 // AT2G15370 // AT4G28850 // AT5G48070
GO:0042594	Biological Process	response to starvation	0.03	// AT5G48850 // AT5G20150 // AT1G66270 // AT2G22240 // AT5G24660 // AT2G19590 // AT1G04770 // AT3G09922
GO:0071496	Biological Process	cellular response to external stimulus	0.032	// AT5G48850 // AT5G20150 // AT1G80760 // AT1G66270 // AT2G22240 // AT5G24660 // AT2G19590 // AT1G04770 // AT3G09922
GO:0044550	Biological Process	secondary metabolite biosynthetic process	0.041	// AT3G26200 // AT5G58860 // AT3G55580 // AT2G25160 // AT5G13580 // AT1G77520 // AT1G77530 // AT1G66800 // AT2G05180 // AT5G06900 // AT3G11430
GO:0004601	Molecular Function	peroxidase activity	3.6e-08	// AT1G68850 // AT4G11290 // AT1G05260 // AT4G16270 // AT2G38380 // AT3G01190 // AT2G18150 // AT2G39040 // AT5G17820 // AT3G21620 // AT5G51060 // AT1G05240 // AT1G05250 // AT1G44970 // AT5G22410
GO:0016684	Molecular Function	oxidoreductase activity, acting on peroxide as acceptor	3.6e-08	// AT1G68850 // AT4G11290 // AT1G05260 // AT4G16270 // AT2G38380 // AT3G01190 // AT2G18150 // AT2G39040 // AT5G17820 // AT3G21620 // AT5G51060 // AT1G05240 // AT1G05250 // AT1G44970 // AT5G22410
GO:0016209	Molecular Function	antioxidant activity	6.9e-07	// AT1G68850 // AT4G11290 // AT1G05260 // AT4G16270 // AT2G38380 // AT3G01190 // AT2G18150 // AT2G39040 // AT5G17820 // AT3G21620 // AT5G51060 // AT1G05240 // AT1G05250 // AT1G44970 // AT5G22410
GO:0016491	Molecular Function	oxidoreductase activity	3.6e-06	// AT1G68850 // AT1G06310 // AT1G04610 // AT4G12270 // AT1G05260 // AT2G39040 // AT1G66800 // AT1G52790 // AT5G51060 // AT1G05240 // AT3G63440 // AT1G77120 // AT5G58860 // AT4G16270 // AT3G21620 // AT1G15540 // AT4G23340 // AT5G58910 // AT3G26200 // AT1G06120 // AT5G17820 // AT2G05180 // AT4G22110 // AT2G30210 // AT5G39890 // AT4G11290 // AT3G01190 // AT1G52820 // AT2G25160 // AT2G18150 // AT1G12…
GO:0020037	Molecular Function	heme binding	3.8e-06	// AT1G68850 // AT4G11290 // AT1G05260 // AT2G25160 // AT5G58860 // AT3G01190 // AT2G18150 // AT5G22410 // AT2G39040 // AT3G26200 // AT5G17820 // AT2G38380 // AT1G05240 // AT1G05250 // AT1G44970 // AT5G06900 // AT1G12740 // AT2G16060 // AT2G05180
GO:0046906	Molecular Function	tetrapyrrole binding	1.6e-05	// AT1G68850 // AT4G11290 // AT1G05260 // AT2G25160 // AT5G58860 // AT3G01190 // AT2G18150 // AT5G22410 // AT2G39040 // AT3G26200 // AT5G17820 // AT2G38380 // AT1G05240 // AT1G05250 // AT1G44970 // AT5G06900 // AT1G12740 // AT2G16060 // AT2G05180
GO:0003824	Molecular Function	catalytic activity	7.1e-05	// AT4G02290 // AT1G05280 // AT4G12270 // AT5G62310 // AT1G66800 // AT5G51060 // AT1G05240 // AT3G24240 // AT3G63440 // AT1G14240 // AT3G46720 // AT4G28650 // AT1G06120 // AT4G02850 // AT3G13784 // AT1G66270 // AT1G13610 // AT4G30110 // AT5G66280 // AT1G02810 // AT3G01840 // AT5G15120 // AT5G23990 // AT5G13580 // AT1G29720 // AT2G22240 // AT3G47720 // AT5G20860 // AT3G03530 // AT1G05250 // AT1G12…
GO:0016757	Molecular Function	transferase activity, transferring glycosyl groups	0.0032	// AT5G57530 // AT1G05280 // AT2G15370 // AT4G28850 // AT3G46720 // AT5G05880 // AT3G44990 // AT5G66690 // AT5G20830 // AT1G63450 // AT1G07260 // AT3G47720 // AT3G43190 // AT1G50580 // AT5G26310 // AT2G29750 // AT2G03370 // AT1G11490 // AT4G11610 // AT5G48070
GO:0022857	Molecular Function	transmembrane transporter activity	0.0046	// AT1G22150 // AT1G70260 // AT5G16530 // AT4G04760 // AT3G47770 // AT1G53270 // AT3G45680 // AT1G80760 // AT3G20460 // AT4G30110 // AT2G25810 // AT3G51895 // AT3G05155 // AT1G15210 // AT1G43650 // AT3G24300 // AT1G33090 // AT4G13420 // AT2G24610 // AT5G13580 // AT5G19520 // AT2G34390 // AT5G19410 // AT5G57090 // AT4G19030 // AT3G21180 // AT2G39510 // AT3G11430
GO:0015075	Molecular Function	ion transmembrane transporter activity	0.013	// AT4G30110 // AT3G20460 // AT3G45680 // AT1G80760 // AT1G22150 // AT4G13420 // AT2G24610 // AT3G21180 // AT5G19520 // AT5G16530 // AT4G04760 // AT3G24300 // AT2G34390 // AT3G51895 // AT3G05155 // AT5G57090 // AT3G11430 // AT4G19030
GO:0005215	Molecular Function	transporter activity	0.018	// AT1G22150 // AT1G70260 // AT5G16530 // AT4G04760 // AT3G47770 // AT1G53270 // AT3G45680 // AT1G80760 // AT3G20460 // AT4G30110 // AT2G25810 // AT3G51895 // AT3G05155 // AT5G48485 // AT1G15210 // AT1G43650 // AT3G24300 // AT4G25220 // AT1G33090 // AT4G13420 // AT2G24610 // AT5G13580 // AT5G19520 // AT2G34390 // AT5G19410 // AT5G57090 // AT4G19030 // AT3G21180 // AT2G39510 // AT3G11430
GO:0016758	Molecular Function	transferase activity, transferring hexosyl groups	0.018	// AT5G57530 // AT5G66690 // AT2G15370 // AT4G28850 // AT3G46720 // AT5G05880 // AT3G44990 // AT5G20830 // AT1G07260 // AT2G29750 // AT3G43190 // AT5G26310 // AT5G48070
GO:0046527	Molecular Function	glucosyltransferase activity	0.018	// AT5G57530 // AT5G66690 // AT5G05880 // AT5G20830 // AT3G43190 // AT2G29750 // AT1G07260 // AT5G26310
GO:0015293	Molecular Function	symporter activity	0.028	// AT1G22150 // AT3G20460 // AT4G13420 // AT5G16530 // AT4G04760 // AT3G05155 // AT5G57090 // AT3G51895
GO:0035251	Molecular Function	UDP-glucosyltransferase activity	0.034	// AT5G66690 // AT5G05880 // AT5G20830 // AT3G43190 // AT2G29750 // AT1G07260 // AT5G26310
GO:0022804	Molecular Function	active transmembrane transporter activity	0.034	// AT4G30110 // AT5G57090 // AT3G20460 // AT1G22150 // AT4G13420 // AT5G13580 // AT3G21180 // AT5G16530 // AT4G04760 // AT3G47770 // AT3G05155 // AT1G53270 // AT5G19410 // AT1G15210 // AT3G51895 // AT1G33090
GO:0016798	Molecular Function	hydrolase activity, acting on glycosyl bonds	0.038	// AT5G57530 // AT4G02290 // AT5G48070 // AT3G44990 // AT3G13784 // AT1G66270 // AT5G14650 // AT2G32990 // AT4G21760 // AT4G28850 // AT3G59850 // AT1G48100 // AT3G07970
GO:0080043	Molecular Function	quercetin 3-O-glucosyltransferase activity	0.038	// AT5G66690 // AT5G26310 // AT1G07260 // AT2G29750 // AT5G05880
GO:0080044	Molecular Function	quercetin 7-O-glucosyltransferase activity	0.038	// AT5G66690 // AT5G26310 // AT1G07260 // AT2G29750 // AT5G05880
GO:0046872	Molecular Function	metal ion binding	0.039	// AT4G00070 // AT1G68850 // AT4G17280 // AT5G39150 // AT4G12270 // AT3G01190 // AT5G62310 // AT2G39040 // AT5G51720 // AT5G51060 // AT1G05240 // AT2G16060 // AT1G77120 // AT5G52690 // AT5G58860 // AT2G04500 // AT5G39180 // AT2G01880 // AT1G15540 // AT4G23340 // AT3G26200 // AT1G44180 // AT5G17820 // AT2G05180 // AT4G22110 // AT5G15120 // AT5G39890 // AT4G11290 // AT1G05260 // AT1G52820 // AT2G25…
GO:0043169	Molecular Function	cation binding	0.039	// AT4G00070 // AT1G68850 // AT4G17280 // AT5G39150 // AT4G12270 // AT3G01190 // AT5G62310 // AT2G39040 // AT5G51720 // AT5G51060 // AT1G05240 // AT2G16060 // AT1G77120 // AT5G52690 // AT5G58860 // AT2G04500 // AT5G39180 // AT2G01880 // AT1G15540 // AT4G23340 // AT3G26200 // AT1G44180 // AT5G17820 // AT2G05180 // AT4G22110 // AT5G15120 // AT5G39890 // AT4G11290 // AT1G05260 // AT1G52820 // AT2G25…
GO:0004553	Molecular Function	hydrolase activity, hydrolyzing O-glycosyl compounds	0.048	// AT4G02290 // AT5G48070 // AT3G44990 // AT3G13784 // AT1G66270 // AT5G14650 // AT2G32990 // AT4G21760 // AT4G28850 // AT3G59850 // AT1G48100 // AT3G07970
GO:0005576	Cellular Component	extracellular region	2.7e-10	// AT5G45920 // AT1G68850 // AT4G02290 // AT4G17280 // AT5G39150 // AT3G44990 // AT1G02810 // AT1G19900 // AT2G18150 // AT1G44970 // AT2G39040 // AT1G73330 // AT2G25240 // AT1G05240 // AT1G33540 // AT3G63440 // AT5G58910 // AT3G46270 // AT4G05200 // AT1G19090 // AT3G48340 // AT5G44550 // AT5G39180 // AT2G01880 // AT3G13784 // AT1G66270 // AT5G14650 // AT5G46900 // AT5G60520 // AT5G17820 // AT5G63…
GO:0071944	Cellular Component	cell periphery	9e-05	// AT5G49270 // AT5G13990 // AT1G22150 // AT1G70260 // AT3G44990 // AT1G02810 // AT1G05260 // AT2G24610 // AT5G16530 // AT4G04760 // AT3G03530 // AT3G24300 // AT5G51060 // AT1G05240 // AT3G24240 // AT1G53270 // AT5G24100 // AT5G42630 // AT2G16060 // AT2G23050 // AT4G05200 // AT1G77120 // AT3G45680 // AT3G03270 // AT1G80760 // AT5G44550 // AT4G13420 // AT4G11310 // AT4G30110 // AT2G25810 // AT5G17…
GO:0030312	Cellular Component	external encapsulating structure	0.00076	// AT3G44990 // AT1G02810 // AT1G05260 // AT1G54970 // AT1G05240 // AT5G42630 // AT2G16060 // AT5G17820 // AT1G16160 // AT5G22410 // AT1G48100 // AT2G18150 // AT5G20860 // AT1G05250 // AT2G20750 // AT1G80240 // AT4G11310 // AT5G57530 // AT4G28850 // AT2G38380 // AT3G07970 // AT5G48070
GO:0005618	Cellular Component	cell wall	0.00076	// AT3G44990 // AT1G02810 // AT1G05260 // AT1G54970 // AT1G05240 // AT5G42630 // AT2G16060 // AT5G17820 // AT1G16160 // AT5G22410 // AT1G48100 // AT2G18150 // AT5G20860 // AT1G05250 // AT2G20750 // AT1G80240 // AT4G11310 // AT5G57530 // AT4G28850 // AT2G38380 // AT3G07970 // AT5G48070
GO:0005887	Cellular Component	integral component of plasma membrane	0.002	// AT3G24300 // AT1G80760 // AT1G22150 // AT2G24610 // AT3G21180 // AT2G25810 // AT5G51060 // AT3G51895 // AT2G34390 // AT4G19030
GO:0031226	Cellular Component	intrinsic component of plasma membrane	0.016	// AT3G24300 // AT1G80760 // AT1G22150 // AT2G24610 // AT3G21180 // AT2G25810 // AT5G51060 // AT3G51895 // AT2G34390 // AT3G60280 // AT4G19030
GO:0005615	Cellular Component	extracellular space	0.033	// AT1G76952 // AT5G10130 // AT2G25240 // AT3G63440 // AT3G48340 // AT4G11310
GO:0005886	Cellular Component	plasma membrane	0.033	// AT5G49270 // AT3G50150 // AT1G22150 // AT1G70260 // AT3G44990 // AT5G16530 // AT4G04760 // AT3G03530 // AT3G24300 // AT5G51060 // AT3G24240 // AT1G53270 // AT5G24100 // AT2G16060 // AT2G23050 // AT4G05200 // AT1G77120 // AT3G45680 // AT3G03270 // AT1G80760 // AT5G44550 // AT4G13420 // AT4G30110 // AT2G25810 // AT1G16160 // AT3G51895 // AT3G05155 // AT5G36260 // AT3G01840 // AT2G20520 // AT4G27…

## Sheet: Masa-0
Functional enrichment for upregulated genes
GO term	Type of term	Description	p-value	Entries
GO:0009605	Biological Process	response to external stimulus	0.00094	// AT3G08860 // AT2G14610 // AT4G16260 // AT4G37990 // AT1G32960 // AT5G13080 // AT1G73260 // AT1G52400 // AT2G47190 // AT1G02920
GO:0050896	Biological Process	response to stimulus	0.00094	// AT3G08860 // AT4G21830 // AT2G14610 // AT1G73260 // AT5G18010 // AT4G16260 // AT1G13340 // AT2G29470 // AT5G18030 // AT4G37990 // AT1G02920 // AT1G32960 // AT2G47190 // AT1G69920 // AT1G52400 // AT5G13080 // AT5G18050 // AT5G18080 // AT5G39860
GO:0042221	Biological Process	response to chemical	0.00094	// AT4G21830 // AT2G14610 // AT1G73260 // AT5G18010 // AT2G29470 // AT5G18030 // AT1G02920 // AT2G47190 // AT1G69920 // AT1G52400 // AT5G18050 // AT5G18080 // AT5G39860
GO:0040008	Biological Process	regulation of growth	0.0017	// AT5G18050 // AT5G18030 // AT5G39860 // AT5G18010 // AT5G18080
GO:0006955	Biological Process	immune response	0.0027	// AT1G32960 // AT2G14610 // AT4G37990 // AT4G16260 // AT1G02920
GO:0045087	Biological Process	innate immune response	0.0027	// AT1G32960 // AT2G14610 // AT4G37990 // AT4G16260 // AT1G02920
GO:0002376	Biological Process	immune system process	0.0038	// AT1G32960 // AT2G14610 // AT4G37990 // AT4G16260 // AT1G02920
GO:0009755	Biological Process	hormone-mediated signaling pathway	0.013	// AT5G18030 // AT5G18010 // AT1G52400 // AT5G18050 // AT5G18080 // AT5G39860
GO:0043207	Biological Process	response to external biotic stimulus	0.013	// AT2G14610 // AT4G16260 // AT4G37990 // AT1G32960 // AT1G73260 // AT1G52400 // AT1G02920
GO:0051707	Biological Process	response to other organism	0.013	// AT2G14610 // AT4G16260 // AT4G37990 // AT1G32960 // AT1G73260 // AT1G52400 // AT1G02920
GO:0010033	Biological Process	response to organic substance	0.013	// AT2G14610 // AT1G73260 // AT5G18030 // AT2G47190 // AT5G18010 // AT1G52400 // AT5G18050 // AT5G18080 // AT5G39860
GO:0009607	Biological Process	response to biotic stimulus	0.013	// AT2G14610 // AT4G16260 // AT4G37990 // AT1G32960 // AT1G73260 // AT1G52400 // AT1G02920
GO:0009651	Biological Process	response to salt stress	0.013	// AT1G02920 // AT2G47190 // AT4G16260 // AT1G73260 // AT1G52400
GO:0032870	Biological Process	cellular response to hormone stimulus	0.013	// AT5G18030 // AT5G18010 // AT1G52400 // AT5G18050 // AT5G18080 // AT5G39860
GO:0009725	Biological Process	response to hormone	0.013	// AT2G14610 // AT5G18030 // AT2G47190 // AT5G18010 // AT1G52400 // AT5G18050 // AT5G18080 // AT5G39860
GO:0071495	Biological Process	cellular response to endogenous stimulus	0.013	// AT5G18030 // AT5G18010 // AT1G52400 // AT5G18050 // AT5G18080 // AT5G39860
GO:0010035	Biological Process	response to inorganic substance	0.014	// AT4G21830 // AT2G14610 // AT2G47190 // AT1G73260 // AT1G52400 // AT1G02920
GO:0009719	Biological Process	response to endogenous stimulus	0.014	// AT2G14610 // AT5G18030 // AT2G47190 // AT5G18010 // AT1G52400 // AT5G18050 // AT5G18080 // AT5G39860
GO:0098542	Biological Process	defense response to other organism	0.014	// AT2G14610 // AT4G16260 // AT1G32960 // AT1G73260 // AT1G52400 // AT1G02920
GO:0006970	Biological Process	response to osmotic stress	0.016	// AT1G02920 // AT2G47190 // AT4G16260 // AT1G73260 // AT1G52400
GO:0051716	Biological Process	cellular response to stimulus	0.019	// AT3G08860 // AT5G18030 // AT4G37990 // AT2G47190 // AT5G18010 // AT1G52400 // AT5G13080 // AT5G18050 // AT5G18080 // AT5G39860
GO:0071310	Biological Process	cellular response to organic substance	0.019	// AT5G18030 // AT5G18010 // AT1G52400 // AT5G18050 // AT5G18080 // AT5G39860
GO:0040007	Biological Process	growth	0.019	// AT5G18050 // AT5G18030 // AT5G39860 // AT5G18010 // AT5G18080
GO:0006950	Biological Process	response to stress	0.021	// AT4G21830 // AT2G14610 // AT4G16260 // AT1G13340 // AT4G37990 // AT1G32960 // AT5G13080 // AT1G73260 // AT1G52400 // AT2G47190 // AT1G02920
GO:0006952	Biological Process	defense response	0.029	// AT2G14610 // AT4G16260 // AT4G37990 // AT1G32960 // AT1G73260 // AT1G52400 // AT1G02920
GO:0070887	Biological Process	cellular response to chemical stimulus	0.032	// AT5G18030 // AT5G18010 // AT1G52400 // AT5G18050 // AT5G18080 // AT5G39860
GO:0051704	Biological Process	multi-organism process	0.033	// AT2G14610 // AT4G16260 // AT4G37990 // AT1G32960 // AT1G73260 // AT1G52400 // AT1G02920
GO:0007154	Biological Process	cell communication	0.045	// AT3G08860 // AT5G18030 // AT2G47190 // AT5G18010 // AT1G52400 // AT5G18050 // AT5G18080 // AT5G39860
GO:0030312	Cellular Component	external encapsulating structure	0.035	// AT1G32960 // AT2G14610 // AT1G74010 // AT5G57550 // AT4G16260
GO:0005618	Cellular Component	cell wall	0.035	// AT1G32960 // AT2G14610 // AT1G74010 // AT5G57550 // AT4G16260
Functional enrichment for downregulated genes
GO term	Type of term	Description	p-value	Entries
-	-	-	-	-

## Sheet: Overlaps between Bab-0 and VS-0
Functional enrichment for upregulated genes
Type of term	Description	p-value	Entries
Biological Process	Response to oxygen-containing compound	2.61563e-08	AT1G02930 AT1G04580 AT1G09080 AT1G16420 AT1G28480 AT1G30135 AT1G47510 AT1G52890 AT1G79680 AT2G24850 AT2G38240 AT2G39030 AT3G26830 AT3G28210 AT3G28580 AT3G44860 AT3G51440 AT3G51450 AT3G55970 AT3G61190 AT4G04490 AT4G11170 AT4G11890 AT4G23150 AT5G01900 AT5G05600 AT5G11210 AT5G39520 AT5G46050 AT5G46350 AT5G48410 AT5G65600
Biological Process	Response to jasmonic acid	8.6981e-08	AT1G28480 AT1G30135 AT1G47510 AT2G24850 AT2G38240 AT2G39030 AT3G44860 AT3G51440 AT3G51450 AT3G55970 AT5G05600 AT5G46050
Biological Process	Response to biotic stimulus	6.05328e-06	AT1G02930 AT1G19610 AT1G45145 AT1G51890 AT1G61610 AT1G79680 AT2G43510 AT2G43570 AT3G26830 AT3G44860 AT3G51440 AT3G51450 AT3G57260 AT4G01895 AT4G11890 AT4G23150 AT4G23160 AT5G01900 AT5G14180 AT5G20230 AT5G38900 AT5G46050 AT5G46350 AT5G64890 AT5G65600
Biological Process	Biological proc. involved in interspecies interaction between organisms	6.05328e-06	AT1G02930 AT1G19610 AT1G45145 AT1G51890 AT1G61610 AT1G79680 AT2G43510 AT2G43570 AT3G26830 AT3G44860 AT3G51440 AT3G51450 AT3G57260 AT4G01895 AT4G11890 AT4G23150 AT4G23160 AT5G01900 AT5G14180 AT5G20230 AT5G38900 AT5G46050 AT5G46350 AT5G64890 AT5G65600
Biological Process	Response to other organism	6.05328e-06	AT1G02930 AT1G19610 AT1G45145 AT1G51890 AT1G61610 AT1G79680 AT2G43510 AT2G43570 AT3G26830 AT3G44860 AT3G51440 AT3G51450 AT3G57260 AT4G01895 AT4G11890 AT4G23150 AT4G23160 AT5G01900 AT5G14180 AT5G20230 AT5G38900 AT5G46050 AT5G46350 AT5G64890 AT5G65600
Biological Process	Defense response	6.05328e-06	AT1G02930 AT1G19610 AT1G30135 AT1G45145 AT1G51890 AT1G52040 AT1G61610 AT1G79680 AT2G39030 AT2G43510 AT2G43570 AT3G01080 AT3G26830 AT3G57260 AT3G61190 AT4G01895 AT4G11170 AT4G11890 AT4G23150 AT4G23160 AT5G01900 AT5G14180 AT5G38900 AT5G46050 AT5G46350 AT5G64890 AT5G65600
Biological Process	Response to oxidative stress	6.70134e-06	AT1G02930 AT1G04580 AT1G09080 AT1G16420 AT1G45145 AT2G44240 AT3G28580 AT4G11170 AT4G21840 AT4G23150 AT4G37520 AT4G37530 AT5G20230 AT5G46350
Biological Process	Response to salicylic acid	1.23563e-05	AT1G28480 AT1G79680 AT3G44860 AT3G51440 AT3G51450 AT3G61190 AT5G01900 AT5G46050 AT5G65600
Biological Process	Response to lipid	2.03361e-05	AT1G28480 AT1G30135 AT1G47510 AT2G24850 AT2G38240 AT2G39030 AT3G26830 AT3G28210 AT3G28580 AT3G44860 AT3G51440 AT3G51450 AT3G55970 AT4G04490 AT4G11890 AT5G05600 AT5G39520 AT5G46050 AT5G46350
Biological Process	Response to wounding	0.000101317	AT1G30135 AT1G51760 AT2G24850 AT3G44860 AT3G51440 AT3G51450 AT3G54150 AT3G61190 AT5G46050
Biological Process	Response to organic cyclic compound	0.000246318	AT1G28480 AT1G79680 AT2G43570 AT3G44860 AT3G51440 AT3G51450 AT3G61190 AT5G01900 AT5G46050 AT5G65600
Biological Process	Defense response to other organism	0.000345525	AT1G02930 AT1G19610 AT1G45145 AT1G51890 AT1G61610 AT2G43510 AT2G43570 AT3G26830 AT3G57260 AT4G01895 AT4G23150 AT4G23160 AT5G01900 AT5G14180 AT5G38900 AT5G46050 AT5G46350 AT5G64890 AT5G65600
Biological Process	Immune system proc.	0.000352374	AT1G02930 AT1G19610 AT1G45145 AT1G51890 AT1G61610 AT2G43510 AT2G43570 AT3G26830 AT3G57260 AT4G01895 AT4G23150 AT4G23160 AT5G01900 AT5G14180 AT5G38900 AT5G46050 AT5G46350 AT5G64890 AT5G65600
Biological Process	Immune response	0.000352374	AT1G02930 AT1G19610 AT1G45145 AT1G51890 AT1G61610 AT2G43510 AT2G43570 AT3G26830 AT3G57260 AT4G01895 AT4G23150 AT4G23160 AT5G01900 AT5G14180 AT5G38900 AT5G46050 AT5G46350 AT5G64890 AT5G65600
Biological Process	Response to reactive oxygen species	0.0004935	AT1G04580 AT1G09080 AT1G16420 AT3G28580 AT4G11170 AT4G23150 AT5G46350
Biological Process	Response to endogenous stimulus	0.000638491	AT1G28480 AT1G30135 AT1G47510 AT2G24850 AT2G38240 AT2G39030 AT3G26830 AT3G28210 AT3G28580 AT3G44860 AT3G51440 AT3G51450 AT3G55970 AT4G04490 AT4G11890 AT4G32810 AT5G05600 AT5G11210 AT5G39520 AT5G46050 AT5G46350 AT5G48410
Biological Process	Reg. of jasmonic acid mediated signaling pathway	0.00176844	AT1G30135 AT2G38240 AT3G55970 AT5G05600
Biological Process	Systemic acquired resistance	0.00208198	AT2G43570 AT3G26830 AT3G57260 AT4G01895 AT5G65600
Biological Process	Cellular response to oxygen-containing compound	0.0026803	AT1G04580 AT1G16420 AT1G28480 AT1G30135 AT2G38240 AT3G55970 AT4G11890 AT5G01900 AT5G05600 AT5G11210 AT5G46350 AT5G48410 AT5G65600
Biological Process	Response to hormone	0.00355457	AT1G28480 AT1G30135 AT1G47510 AT2G24850 AT2G38240 AT2G39030 AT3G26830 AT3G28210 AT3G28580 AT3G44860 AT3G51440 AT3G51450 AT3G55970 AT4G04490 AT4G11890 AT4G32810 AT5G05600 AT5G39520 AT5G46050 AT5G46350
Molecular Function	Jasmonic acid hydrolase	0.000130738	AT2G38240 AT3G55970 AT5G05600
Molecular Function	Hydrolase activity, acting on carbon-nitrogen (but not peptide) bonds	0.00553879	AT1G51760 AT2G38240 AT3G44300 AT3G55970 AT4G29570 AT5G05600
Molecular Function	Protein serine/threonine kinase activity	0.00947576	AT1G21240 AT1G51890 AT1G61610 AT1G67000 AT1G79680 AT3G57700 AT4G04490 AT4G04510 AT4G11890 AT4G23150 AT4G23160 AT4G36950 AT5G38250 AT5G65600
Molecular Function	Protein serine kinase activity	0.00947576	AT1G21240 AT1G51890 AT1G61610 AT1G67000 AT1G79680 AT4G04490 AT4G04510 AT4G11890 AT4G23150 AT4G23160 AT5G38250 AT5G65600
Molecular Function	Polysaccharide binding	0.0226435	AT1G21240 AT1G67000 AT1G79680 AT5G38250
Molecular Function	Xyloglucan:xyloglucosyl transferase activity	0.0229279	AT3G48580 AT4G25810 AT4G30270
Molecular Function	Carbohydrate binding	0.0229279	AT1G21240 AT1G52040 AT1G60130 AT1G61610 AT1G67000 AT1G79680 AT5G38250 AT5G65600
Molecular Function	Triglyceride lipase activity	0.0448174	AT2G30550 AT5G14180
Functional enrichment for downregulated genes
Type of term	Description	p-value	Entries
Biological Process	Cellular response to toxic substance	3.86854e-05	AT1G05240 AT1G05260 AT1G68850 AT1G77120 AT3G01190 AT4G11290 AT5G17820 AT5G51060
Biological Process	Detoxification	3.86854e-05	AT1G05240 AT1G05260 AT1G49860 AT1G68850 AT1G77120 AT3G01190 AT4G11290 AT5G17820 AT5G51060
Biological Process	Cellular detoxification	3.86854e-05	AT1G05240 AT1G05260 AT1G68850 AT1G77120 AT3G01190 AT4G11290 AT5G17820 AT5G51060
Biological Process	Response to toxic substance	4.93388e-05	AT1G05240 AT1G05260 AT1G49860 AT1G68850 AT1G77120 AT3G01190 AT4G11290 AT5G17820 AT5G51060
Biological Process	Hydrogen peroxide catabolic proc.	6.57784e-05	AT1G05240 AT1G05260 AT1G68850 AT3G01190 AT4G11290 AT5G17820
Biological Process	Reactive oxygen species metabolic proc.	0.000150439	AT1G05240 AT1G05260 AT1G68850 AT2G12646 AT3G01190 AT4G11290 AT5G17820
Biological Process	Cellular oxidant detoxification	0.000150439	AT1G05240 AT1G05260 AT1G68850 AT3G01190 AT4G11290 AT5G17820 AT5G51060
Biological Process	Phenylpropanoid metabolic proc.	0.000405857	AT1G05240 AT2G30210 AT3G11430 AT5G13580 AT5G58860 AT5G58910
Biological Process	Root morphogenesis	0.000405857	AT1G74500 AT2G12646 AT2G30340 AT3G24240 AT3G24300 AT4G11880 AT5G48940 AT5G51060
Biological Process	Plant organ morphogenesis	0.000748535	AT1G74500 AT2G12646 AT2G30130 AT2G30340 AT3G24240 AT3G24300 AT4G11880 AT5G48940 AT5G51060
Biological Process	Secondary metabolic proc.	0.00100091	AT1G05240 AT1G49860 AT2G30210 AT3G11430 AT5G13580 AT5G36180 AT5G58860 AT5G58910
Biological Process	Suberin biosynthetic proc.	0.00163685	AT3G11430 AT5G13580 AT5G58860
Biological Process	Hydrocarbon biosynthetic proc.	0.00295051	AT1G12010 AT1G33750 AT2G19590 AT4G13280
Biological Process	Maintenance of meristem identity	0.00302084	AT2G12646 AT3G24240 AT4G11880 AT5G48940
Biological Process	Cellular response to chemical stimulus	0.00302084	AT1G05240 AT1G05260 AT1G12010 AT1G18100 AT1G68850 AT1G74500 AT1G77120 AT2G19590 AT3G01190 AT3G02550 AT3G60490 AT4G11290 AT5G17820 AT5G20150 AT5G51060 AT5G66985
Biological Process	Plant-type cell wall organization	0.00366121	AT1G05240 AT1G23720 AT1G26250 AT4G08400 AT5G14650
Biological Process	Hydrocarbon metabolic proc.	0.00414532	AT1G12010 AT1G33750 AT2G19590 AT4G13280
Biological Process	Reg. of root meristem growth	0.00423181	AT3G24240 AT4G11880 AT5G48940
Biological Process	Stem cell population maintenance	0.00462164	AT2G12646 AT3G24240 AT4G11880 AT5G48940
Biological Process	Maintenance of cell number	0.00462164	AT2G12646 AT3G24240 AT4G11880 AT5G48940
Cellular Compartment	Cell wall	2.75874e-05	AT1G05240 AT1G05260 AT1G19900 AT1G54970 AT2G30210 AT3G01190 AT3G13784 AT3G44990 AT4G11290 AT5G09520 AT5G14650 AT5G17820 AT5G42630
Cellular Compartment	Plant-type cell wall	2.75874e-05	AT1G05240 AT1G05260 AT1G19900 AT2G30210 AT3G01190 AT4G11290 AT5G14650 AT5G17820
Cellular Compartment	External encapsulating structure	2.75874e-05	AT1G05240 AT1G05260 AT1G19900 AT1G54970 AT2G30210 AT3G01190 AT3G13784 AT3G44990 AT4G11290 AT5G09520 AT5G14650 AT5G17820 AT5G42630
Cellular Compartment	Extracellular region	0.00124577	AT1G05240 AT1G05260 AT1G54970 AT1G68850 AT1G74460 AT2G01880 AT2G30210 AT3G01190 AT3G13784 AT3G44990 AT4G11290 AT4G22235 AT5G09520 AT5G17820 AT5G36180 AT5G58910 AT5G63660
Molecular Function	Peroxidase activity	5.9697e-05	AT1G05240 AT1G05260 AT1G68850 AT3G01190 AT4G11290 AT5G17820 AT5G51060
Molecular Function	Oxidoreductase activity, acting on peroxide as acceptor	5.9697e-05	AT1G05240 AT1G05260 AT1G68850 AT3G01190 AT4G11290 AT5G17820 AT5G51060
Molecular Function	Antioxidant activity	0.000107087	AT1G05240 AT1G05260 AT1G68850 AT3G01190 AT4G11290 AT5G17820 AT5G51060
Molecular Function	Oxidoreductase activity	0.00113442	AT1G05240 AT1G05260 AT1G12010 AT1G12740 AT1G19900 AT1G68850 AT1G77120 AT2G19590 AT2G30210 AT3G01190 AT3G60280 AT4G11290 AT4G12270 AT5G17820 AT5G51060 AT5G58860 AT5G58910
Molecular Function	Heme binding	0.00169636	AT1G05240 AT1G05260 AT1G12740 AT1G68850 AT3G01190 AT4G11290 AT5G17820 AT5G58860
Molecular Function	Tetrapyrrole binding	0.00259712	AT1G05240 AT1G05260 AT1G12740 AT1G68850 AT3G01190 AT4G11290 AT5G17820 AT5G58860
Molecular Function	Structural constituent of cell wall	0.00306419	AT1G23720 AT1G26250 AT4G08400
Molecular Function	Oxidoreductase activity, acting on the CH-NH2 group of donors, oxygen as accepto	0.00306419	AT1G12010 AT2G19590 AT4G12270
Molecular Function	1-aminocyclopropane-1-carboxylate oxidase activity	0.0131968	AT1G12010 AT2G19590
Molecular Function	Peptide receptor activity	0.022425	AT3G24240 AT5G48940
Molecular Function	Hydroquinone:oxygen oxidoreductase activity	0.022425	AT2G30210 AT5G58910
Molecular Function	Water transmembrane transporter activity	0.0440863	AT2G25810 AT4G19030
Molecular Function	Water channel activity	0.0440863	AT2G25810 AT4G19030
Molecular Function	Channel activity	0.0440863	AT2G24610 AT2G25810 AT4G19030 AT5G19520
Molecular Function	Oxidoreductase activity, acting on diphenols and related substances as donors, o	0.0440863	AT2G30210 AT5G58910
Molecular Function	Passive transmembrane transporter activity	0.0440863	AT2G24610 AT2G25810 AT4G19030 AT5G19520
Molecular Function	L-ascorbic acid binding	0.0440863	AT1G12010 AT2G19590
Molecular Function	Peptide binding	0.0440863	AT1G49860 AT3G24240 AT5G48940
